# Supplementary material for: Gene Dosage- and Age-Dependent Differential Transcriptomic Changes in the Prefrontal Cortex of Shank2-Mutant Mice
Source: Front Mol Neurosci. 2021 Jun 11;14:683196. doi: 10.3389/fnmol.2021.683196 (PMC8226033; doi:10.3389/fnmol.2021.683196)
Supplement: Supplementary Table 5 — GSEA results (C5-CC, C5-BP, and C5-MF domains) for W3-HM Shank2-mutant transcripts. [file Table_5.XLSX]

## Sheet: CC_Up
Supplementary Table 5. GSEA results (C5-CC, C5-BP, and C5-MF domains) for W3-HM Shank2-mutant transcripts.
NAME	SIZE	ES	NES	NOM p-val	FDR q-val	FWER p-val	RANK AT MAX	LEADING EDGE
GO_NUCLEAR_CHROMOSOME	466	0.153994	3.73979	0	0	0	7654	tags=70%, list=55%, signal=153%
GO_METHYLTRANSFERASE_COMPLEX	109	0.28867	3.48639	0	0	0	7563	tags=83%, list=55%, signal=183%
GO_NUCLEAR_CHROMATIN	274	0.168538	3.18956	0	0	0	6227	tags=62%, list=45%, signal=110%
GO_HISTONE_METHYLTRANSFERASE_COMPLEX	85	0.301093	3.18555	0	0	0	8203	tags=89%, list=59%, signal=219%
GO_SPLICEOSOMAL_COMPLEX	163	0.199565	2.99985	0	0	0	9632	tags=90%, list=70%, signal=294%
GO_CHROMATIN	411	0.129322	2.98072	0	0	0	7664	tags=68%, list=56%, signal=149%
GO_PROTEIN_ACETYLTRANSFERASE_COMPLEX	88	0.270482	2.96593	0	0.000161858	0.001	8203	tags=86%, list=59%, signal=212%
GO_NUCLEAR_SPECK	353	0.134818	2.91698	0	0.000141626	0.001	6626	tags=61%, list=48%, signal=115%
GO_CHROMOSOME_TELOMERIC_REGION	127	0.215302	2.86663	0	0.000125889	0.001	5310	tags=60%, list=39%, signal=96%
GO_NUCLEAR_CHROMOSOME_TELOMERIC_REGION	96	0.231086	2.60882	0	0.00205029	0.02	5310	tags=61%, list=39%, signal=99%
GO_CHROMOSOMAL_REGION	294	0.126444	2.52354	0.00205339	0.00459051	0.048	4109	tags=42%, list=30%, signal=59%
GO_NUCLEAR_PERIPHERY	125	0.194743	2.51231	0	0.00453994	0.051	3847	tags=47%, list=28%, signal=65%
GO_NUCLEAR_MATRIX	99	0.219263	2.50987	0	0.00427077	0.052	3962	tags=51%, list=29%, signal=70%
GO_NUCLEAR_PORE	69	0.252761	2.48028	0	0.00438869	0.058	5125	tags=62%, list=37%, signal=99%
GO_CATALYTIC_STEP_2_SPLICEOSOME	84	0.226886	2.42581	0	0.00585764	0.083	5098	tags=60%, list=37%, signal=94%
GO_MLL1_2_COMPLEX	29	0.336862	2.18519	0.00197628	0.0227658	0.309	8203	tags=93%, list=59%, signal=229%
GO_PROTEIN_DNA_COMPLEX	98	0.18581	2.10694	0.00646552	0.0363616	0.468	5476	tags=58%, list=40%, signal=96%
GO_U2_TYPE_SPLICEOSOMAL_COMPLEX	79	0.201389	2.0886	0.00204918	0.0389726	0.512	9632	tags=90%, list=70%, signal=296%
GO_SM_LIKE_PROTEIN_FAMILY_COMPLEX	71	0.210009	2.07854	0	0.0391714	0.535	9549	tags=90%, list=69%, signal=292%
GO_H4_HISTONE_ACETYLTRANSFERASE_COMPLEX	39	0.280272	2.06239	0	0.0408702	0.569	7814	tags=85%, list=57%, signal=195%
GO_TRANSCRIPTIONAL_REPRESSOR_COMPLEX	73	0.20395	2.03133	0.00798403	0.0469902	0.634	2302	tags=37%, list=17%, signal=44%
GO_VOLTAGE_GATED_CALCIUM_CHANNEL_COMPLEX	36	0.284109	2.02927	0.00198807	0.0454998	0.639	4902	tags=64%, list=36%, signal=99%
GO_PROTEASOME_ACCESSORY_COMPLEX	24	0.334895	1.95974	0.00393701	0.0664753	0.775	6881	tags=83%, list=50%, signal=166%
GO_RIBONUCLEOPROTEIN_GRANULE	186	0.12245	1.94094	0	0.070288	0.808	10048	tags=85%, list=73%, signal=309%
GO_SWI_SNF_SUPERFAMILY_TYPE_COMPLEX	69	0.199733	1.94053	0.00811359	0.0675584	0.808	6852	tags=70%, list=50%, signal=138%
GO_INO80_TYPE_COMPLEX	23	0.329719	1.90909	0.0106157	0.0771022	0.864	6852	tags=83%, list=50%, signal=164%
GO_PEPTIDASE_COMPLEX	82	0.181002	1.90621	0.0094518	0.0754778	0.87	9795	tags=89%, list=71%, signal=305%
GO_CALCIUM_CHANNEL_COMPLEX	56	0.218408	1.89071	0.0119284	0.0799402	0.896	5126	tags=59%, list=37%, signal=93%
GO_NUCLEOLAR_PART	162	0.123065	1.84968	0.0201207	0.0961838	0.943	7686	tags=68%, list=56%, signal=152%
GO_SEX_CHROMOSOME	23	0.315006	1.81739	0.0121704	0.11031	0.964	9453	tags=100%, list=69%, signal=317%
GO_PCG_PROTEIN_COMPLEX	44	0.231528	1.79819	0.0145833	0.119654	0.975	6846	tags=73%, list=50%, signal=144%
GO_RNA_POLYMERASE_II_TRANSCRIPTION_FACTOR_COMPLEX	135	0.131473	1.79654	0.0213178	0.117126	0.977	8317	tags=73%, list=60%, signal=183%
GO_PRERIBOSOME	69	0.182531	1.77997	0.0176471	0.123699	0.984	4090	tags=48%, list=30%, signal=68%
GO_SMALL_SUBUNIT_PROCESSOME	33	0.262366	1.77829	0.0243408	0.121211	0.986	7255	tags=79%, list=53%, signal=166%
GO_SAGA_TYPE_COMPLEX	26	0.290718	1.75915	0.0138067	0.130396	0.99	8197	tags=88%, list=59%, signal=218%
GO_PRESPLICEOSOME	15	0.38631	1.75594	0.034413	0.128995	0.99	5710	tags=80%, list=41%, signal=136%
GO_REPLISOME	27	0.285463	1.75572	0.0181818	0.125591	0.99	2710	tags=48%, list=20%, signal=60%
GO_PERICENTRIOLAR_MATERIAL	21	0.309379	1.71257	0.0264228	0.150653	0.998	6903	tags=81%, list=50%, signal=162%
GO_POLYSOME	63	0.179643	1.70893	0.0263158	0.149249	0.998	8697	tags=81%, list=63%, signal=218%
GO_NUCLEAR_ENVELOPE	401	0.0746817	1.70115	0.0238569	0.151431	0.998	3917	tags=36%, list=28%, signal=48%
GO_SITE_OF_DNA_DAMAGE	60	0.189811	1.70111	0.0290135	0.147809	0.998	6127	tags=63%, list=44%, signal=113%
GO_SITE_OF_DOUBLE_STRAND_BREAK	49	0.209458	1.69879	0.0392562	0.145724	0.998	6127	tags=65%, list=44%, signal=117%
GO_H4_H2A_HISTONE_ACETYLTRANSFERASE_COMPLEX	18	0.331494	1.68373	0.025641	0.154358	0.999	7692	tags=89%, list=56%, signal=201%
GO_MITOTIC_SPINDLE	92	0.152312	1.68057	0.0326531	0.153464	0.999	6307	tags=61%, list=46%, signal=111%
GO_HETEROTRIMERIC_G_PROTEIN_COMPLEX	23	0.285075	1.6626	0.0289575	0.165416	1	3869	tags=57%, list=28%, signal=78%
GO_FIBRILLAR_CENTER	118	0.13307	1.65894	0.0307102	0.164461	1	6945	tags=64%, list=50%, signal=127%
GO_ENDOPEPTIDASE_COMPLEX	61	0.184687	1.65657	0.0281426	0.162943	1	10576	tags=95%, list=77%, signal=406%
GO_NUCLEAR_REPLICATION_FORK	41	0.21732	1.64127	0.033543	0.172525	1	5420	tags=61%, list=39%, signal=100%
GO_NUCLEAR_HETEROCHROMATIN	28	0.263221	1.63794	0.0245283	0.171895	1	6227	tags=71%, list=45%, signal=130%
GO_CELL_CELL_ADHERENS_JUNCTION	102	0.137126	1.62541	0.0513834	0.178796	1	10020	tags=86%, list=73%, signal=313%
GO_MEMBRANE_REGION	279	0.0835657	1.62177	0.0374753	0.178218	1	3368	tags=33%, list=24%, signal=42%
GO_MIDBODY	155	0.110382	1.62112	0.0269151	0.17529	1	4811	tags=46%, list=35%, signal=70%
GO_REPLICATION_FORK	63	0.171617	1.61196	0.0382294	0.179619	1	9245	tags=84%, list=67%, signal=254%
GO_COPI_COATED_VESICLE	24	0.274225	1.60843	0.040568	0.179121	1	6567	tags=75%, list=48%, signal=143%
GO_NUCLEAR_TRANSCRIPTION_FACTOR_COMPLEX	170	0.104018	1.59015	0.0415842	0.191496	1	8317	tags=71%, list=60%, signal=176%
GO_HETEROCHROMATIN	66	0.169316	1.58704	0.0488281	0.191064	1	7496	tags=71%, list=54%, signal=155%
GO_PRECATALYTIC_SPLICEOSOME	43	0.200175	1.57204	0.0406504	0.201129	1	11038	tags=100%, list=80%, signal=499%
GO_CYTOPLASMIC_STRESS_GRANULE	51	0.185555	1.5686	0.0475207	0.200754	1	9618	tags=88%, list=70%, signal=291%
GO_NEUROTRANSMITTER_RECEPTOR_COMPLEX	52	0.185716	1.56341	0.0502008	0.202238	1	5669	tags=60%, list=41%, signal=101%
GO_MEDIATOR_COMPLEX	36	0.214498	1.55577	0.0601202	0.205999	1	8158	tags=81%, list=59%, signal=197%
GO_INTRINSIC_COMPONENT_OF_PRESYNAPTIC_ACTIVE_ZONE_MEMBRANE	18	0.30705	1.55539	0.0492813	0.203096	1	4964	tags=67%, list=36%, signal=104%
GO_MITOTIC_SPINDLE_POLE	26	0.254634	1.55036	0.060166	0.204372	1	6572	tags=73%, list=48%, signal=139%
GO_U1_SNRNP	18	0.308514	1.54516	0.0701403	0.206174	1	5710	tags=72%, list=41%, signal=123%
GO_ACTIN_FILAMENT_BUNDLE	59	0.16546	1.54504	0.0694445	0.203045	1	5908	tags=59%, list=43%, signal=103%
GO_GOLGI_CISTERNA_MEMBRANE	64	0.164481	1.54433	0.0487329	0.200641	1	7007	tags=67%, list=51%, signal=136%
GO_ORGANELLE_MEMBRANE_CONTACT_SITE	18	0.297684	1.54165	0.0512295	0.200312	1	9690	tags=100%, list=70%, signal=336%
GO_SPINDLE	304	0.077732	1.53982	0.0498084	0.199207	1	4712	tags=42%, list=34%, signal=62%
GO_ESC_E_Z_COMPLEX	15	0.324303	1.53795	0.0528455	0.197674	1	3806	tags=60%, list=28%, signal=83%
GO_CHROMOSOME_CENTROMERIC_REGION	171	0.0987145	1.53001	0.0643863	0.20174	1	4058	tags=39%, list=29%, signal=55%
GO_TRANSCRIPTION_ELONGATION_FACTOR_COMPLEX	51	0.178093	1.51087	0.0466926	0.217117	1	6746	tags=67%, list=49%, signal=130%
GO_SWI_SNF_COMPLEX	15	0.318685	1.5043	0.0627451	0.220172	1	7561	tags=87%, list=55%, signal=192%
GO_ENDOPLASMIC_RETICULUM_GOLGI_INTERMEDIATE_COMPARTMENT	109	0.122348	1.49327	0.0780287	0.227574	1	9206	tags=79%, list=67%, signal=235%
GO_TELOMERASE_HOLOENZYME_COMPLEX	20	0.275608	1.49165	0.0684105	0.22596	1	1720	tags=40%, list=12%, signal=46%
GO_GOLGI_ASSOCIATED_VESICLE	149	0.102847	1.48225	0.0916179	0.232376	1	7574	tags=65%, list=55%, signal=143%
GO_PML_BODY	92	0.134184	1.48033	0.0750507	0.231348	1	4007	tags=42%, list=29%, signal=59%
GO_ORGANELLAR_RIBOSOME	87	0.136172	1.48031	0.0815109	0.228369	1	8278	tags=74%, list=60%, signal=183%
GO_REGION_OF_CYTOSOL	24	0.255402	1.47959	0.0709939	0.226072	1	3953	tags=54%, list=29%, signal=76%
GO_COPI_COATED_VESICLE_MEMBRANE	17	0.296902	1.47884	0.0736842	0.22388	1	8078	tags=88%, list=59%, signal=213%
GO_ACTOMYOSIN	63	0.157516	1.47618	0.0712871	0.223755	1	6155	tags=60%, list=45%, signal=108%
GO_NBAF_COMPLEX	15	0.318685	1.47003	0.0650407	0.226704	1	7561	tags=87%, list=55%, signal=192%
GO_OTHER_ORGANISM	61	0.155405	1.4629	0.0972222	0.23156	1	5326	tags=54%, list=39%, signal=88%
GO_GOLGI_STACK	115	0.115552	1.4436	0.0954447	0.248397	1	7173	tags=63%, list=52%, signal=131%
GO_ENDOPLASMIC_RETICULUM_QUALITY_CONTROL_COMPARTMENT	21	0.257215	1.44005	0.105372	0.249194	1	3681	tags=52%, list=27%, signal=71%
GO_CONDENSED_CHROMOSOME	178	0.0921182	1.44002	0.0892495	0.246263	1	7345	tags=62%, list=53%, signal=132%
GO_CATION_CHANNEL_COMPLEX	194	0.08784	1.43106	0.0792079	0.25357	1	4776	tags=43%, list=35%, signal=65%
GO_NUCLEAR_EXOSOME_RNASE_COMPLEX_	16	0.293807	1.40549	0.128571	0.278672	1	7157	tags=81%, list=52%, signal=169%
GO_FILOPODIUM_MEMBRANE	18	0.267855	1.3856	0.134	0.299671	1	1673	tags=39%, list=12%, signal=44%
GO_AXONAL_GROWTH_CONE	25	0.229874	1.38531	0.117647	0.296491	1	8419	tags=84%, list=61%, signal=215%
GO_SIN3_TYPE_COMPLEX	15	0.29065	1.38387	0.113821	0.294837	1	5189	tags=67%, list=38%, signal=107%
GO_U2_TYPE_CATALYTIC_STEP_2_SPLICEOSOME	30	0.210995	1.37593	0.105058	0.301135	1	8588	tags=83%, list=62%, signal=220%
GO_INTRINSIC_COMPONENT_OF_POSTSYNAPTIC_MEMBRANE	113	0.111529	1.37496	0.112381	0.299073	1	8115	tags=70%, list=59%, signal=168%
GO_POLYSOMAL_RIBOSOME	27	0.221585	1.37151	0.110664	0.299948	1	8697	tags=85%, list=63%, signal=230%
GO_SPLICEOSOMAL_TRI_SNRNP_COMPLEX	30	0.206816	1.36295	0.120408	0.307757	1	10944	tags=100%, list=79%, signal=483%
GO_GOLGI_CISTERNA	87	0.124268	1.35719	0.115607	0.311463	1	7173	tags=64%, list=52%, signal=133%
GO_P_BODY	71	0.135479	1.34369	0.147177	0.326094	1	6881	tags=63%, list=50%, signal=126%
GO_ENDOPLASMIC_RETICULUM_GOLGI_INTERMEDIATE_COMPARTMENT_MEMBRANE	61	0.146863	1.33733	0.143984	0.33047	1	10191	tags=89%, list=74%, signal=338%
GO_KINETOCHORE	120	0.103685	1.32753	0.138075	0.339882	1	3983	tags=39%, list=29%, signal=55%
GO_ORGANELLAR_SMALL_RIBOSOMAL_SUBUNIT	28	0.208408	1.31499	0.174089	0.353005	1	8459	tags=82%, list=61%, signal=212%
GO_PRERIBOSOME_LARGE_SUBUNIT_PRECURSOR	22	0.232215	1.313	0.159763	0.352306	1	4324	tags=55%, list=31%, signal=79%
GO_MRNA_CLEAVAGE_FACTOR_COMPLEX	20	0.245432	1.31149	0.143141	0.351031	1	1446	tags=35%, list=10%, signal=39%
GO_INTRINSIC_COMPONENT_OF_SYNAPTIC_MEMBRANE	155	0.0899304	1.30268	0.138728	0.359022	1	8115	tags=68%, list=59%, signal=163%
GO_TRANSCRIPTION_FACTOR_COMPLEX	284	0.067252	1.29588	0.167954	0.365308	1	8317	tags=67%, list=60%, signal=165%
GO_EUCHROMATIN	24	0.220509	1.29176	0.160494	0.367417	1	5008	tags=58%, list=36%, signal=91%
GO_POSTSYNAPTIC_MEMBRANE	293	0.0647531	1.28823	0.171598	0.369065	1	8115	tags=65%, list=59%, signal=155%
GO_NUCLEAR_UBIQUITIN_LIGASE_COMPLEX	41	0.166214	1.28042	0.179487	0.37648	1	9150	tags=83%, list=66%, signal=246%
GO_NEURON_TO_NEURON_SYNAPSE	335	0.0616415	1.27669	0.158759	0.378087	1	8638	tags=69%, list=63%, signal=179%
GO_SPINDLE_MIDZONE	31	0.193462	1.27128	0.199234	0.382419	1	7569	tags=74%, list=55%, signal=164%
GO_CELL_SUBSTRATE_JUNCTION	391	0.0547561	1.26055	0.168675	0.394139	1	5085	tags=42%, list=37%, signal=65%
GO_U12_TYPE_SPLICEOSOMAL_COMPLEX	26	0.207631	1.25994	0.212476	0.391405	1	7219	tags=73%, list=52%, signal=153%
GO_PROTEIN_SERINE_THREONINE_PHOSPHATASE_COMPLEX	43	0.161349	1.25548	0.187629	0.394271	1	9006	tags=81%, list=65%, signal=234%
GO_LAMELLIPODIUM_MEMBRANE	21	0.216558	1.23967	0.21118	0.413445	1	1614	tags=33%, list=12%, signal=38%
GO_PLASMA_MEMBRANE_PROTEIN_COMPLEX	456	0.0495081	1.22392	0.212185	0.43395	1	4208	tags=35%, list=31%, signal=49%
GO_TRANSFERASE_COMPLEX_TRANSFERRING_PHOSPHORUS_CONTAINING_GROUPS	231	0.0701011	1.2227	0.197034	0.431843	1	11526	tags=90%, list=84%, signal=542%
GO_CIS_GOLGI_NETWORK	44	0.155855	1.21286	0.231388	0.444202	1	9140	tags=82%, list=66%, signal=242%
GO_NUCLEAR_TRANSCRIPTIONAL_REPRESSOR_COMPLEX	27	0.191441	1.20107	0.229675	0.459378	1	1961	tags=33%, list=14%, signal=39%
GO_CUL4_RING_E3_UBIQUITIN_LIGASE_COMPLEX	30	0.182058	1.19836	0.241036	0.459656	1	6228	tags=63%, list=45%, signal=115%
GO_CYTOPLASMIC_MICROTUBULE	59	0.135107	1.19564	0.256148	0.460154	1	9831	tags=85%, list=71%, signal=294%
GO_NURD_COMPLEX	15	0.258014	1.19434	0.233533	0.458517	1	1961	tags=40%, list=14%, signal=47%
GO_CYTOPLASMIC_SIDE_OF_MEMBRANE	154	0.082209	1.19307	0.230469	0.456813	1	5057	tags=45%, list=37%, signal=70%
GO_DNA_PACKAGING_COMPLEX	23	0.21208	1.19163	0.246602	0.455439	1	4874	tags=57%, list=35%, signal=87%
GO_CAJAL_BODY	55	0.139436	1.18955	0.24	0.455107	1	9618	tags=84%, list=70%, signal=275%
GO_EXON_EXON_JUNCTION_COMPLEX	20	0.218666	1.18753	0.230326	0.454475	1	7331	tags=75%, list=53%, signal=160%
GO_AXONEME_PART	31	0.17832	1.18409	0.254473	0.456112	1	5553	tags=58%, list=40%, signal=97%
GO_TRANS_GOLGI_NETWORK_TRANSPORT_VESICLE	28	0.185894	1.1751	0.25	0.467015	1	10739	tags=96%, list=78%, signal=435%
GO_TRANSLATION_PREINITIATION_COMPLEX	17	0.235196	1.17342	0.257426	0.466028	1	5683	tags=65%, list=41%, signal=110%
GO_HISTONE_DEACETYLASE_COMPLEX	67	0.119874	1.16965	0.238095	0.468164	1	10704	tags=90%, list=78%, signal=398%
GO_SPINDLE_POLE	148	0.0838099	1.16913	0.25188	0.46524	1	7242	tags=61%, list=53%, signal=127%
GO_LATERAL_PLASMA_MEMBRANE	49	0.142798	1.16765	0.248988	0.464006	1	4510	tags=47%, list=33%, signal=70%
GO_CENTROSOME	467	0.0460418	1.16733	0.248175	0.460924	1	9810	tags=76%, list=71%, signal=253%
GO_CHAPERONE_COMPLEX	19	0.225649	1.16417	0.246377	0.462153	1	7779	tags=79%, list=56%, signal=181%
GO_CILIARY_BASE	29	0.182008	1.16236	0.260116	0.461357	1	9383	tags=86%, list=68%, signal=269%
GO_AMPA_GLUTAMATE_RECEPTOR_COMPLEX	27	0.187785	1.16086	0.266802	0.460115	1	9673	tags=89%, list=70%, signal=297%
GO_ATPASE_COMPLEX	88	0.106031	1.15666	0.275574	0.462937	1	6852	tags=60%, list=50%, signal=119%
GO_SPINDLE_MICROTUBULE	52	0.136169	1.14837	0.261759	0.472413	1	7941	tags=71%, list=58%, signal=167%
GO_U2_SNRNP	19	0.217768	1.14445	0.275794	0.474795	1	5710	tags=63%, list=41%, signal=108%
GO_CONDENSED_CHROMOSOME_CENTROMERIC_REGION	102	0.0969757	1.14388	0.266284	0.472136	1	5567	tags=50%, list=40%, signal=83%
GO_EXTRINSIC_COMPONENT_OF_PLASMA_MEMBRANE	137	0.085192	1.14267	0.283702	0.470617	1	3869	tags=36%, list=28%, signal=50%
GO_NUCLEAR_MEMBRANE	265	0.0610877	1.14211	0.284404	0.468054	1	5782	tags=48%, list=42%, signal=81%
GO_PHAGOCYTIC_CUP	23	0.197171	1.14104	0.303327	0.466355	1	882	tags=26%, list=6%, signal=28%
GO_FILOPODIUM	92	0.103413	1.14057	0.267748	0.463689	1	2180	tags=26%, list=16%, signal=31%
GO_AXONEMAL_DYNEIN_COMPLEX	16	0.238512	1.13381	0.297297	0.470606	1	3609	tags=50%, list=26%, signal=68%
GO_DNA_REPLICATION_FACTOR_A_COMPLEX	15	0.238865	1.12213	0.293388	0.485814	1	9580	tags=93%, list=69%, signal=305%
GO_RIBOSOME	215	0.0658282	1.11625	0.314815	0.492161	1	11421	tags=89%, list=83%, signal=512%
GO_GOLGI_ASSOCIATED_VESICLE_MEMBRANE	91	0.0981391	1.10824	0.30303	0.501715	1	10930	tags=89%, list=79%, signal=426%
GO_CILIARY_PLASM	95	0.0948145	1.09649	0.322896	0.517814	1	5233	tags=47%, list=38%, signal=76%
GO_NUCLEAR_EUCHROMATIN	18	0.215325	1.09553	0.335329	0.515904	1	4695	tags=56%, list=34%, signal=84%
GO_PRESYNAPTIC_ACTIVE_ZONE_MEMBRANE	27	0.176112	1.08906	0.34749	0.523446	1	6769	tags=67%, list=49%, signal=131%
GO_LAMELLIPODIUM	176	0.0698937	1.08105	0.342308	0.53314	1	2025	tags=22%, list=15%, signal=25%
GO_CYTOSOLIC_PART	208	0.0641668	1.07662	0.361829	0.536953	1	12388	tags=96%, list=90%, signal=931%
GO_CAVEOLA	71	0.105767	1.06032	0.365344	0.561052	1	10008	tags=83%, list=73%, signal=301%
GO_FLEMMING_BODY	25	0.176237	1.05901	0.361746	0.559666	1	9709	tags=88%, list=70%, signal=297%
GO_CATENIN_COMPLEX	26	0.171114	1.04946	0.372047	0.573082	1	1887	tags=31%, list=14%, signal=36%
GO_ENDOPLASMIC_RETICULUM_EXIT_SITE	17	0.211562	1.04852	0.363636	0.571041	1	7631	tags=76%, list=55%, signal=171%
GO_GOLGI_LUMEN	65	0.111035	1.04761	0.379242	0.569016	1	3567	tags=37%, list=26%, signal=50%
GO_RNA_POLYMERASE_COMPLEX	99	0.0919958	1.0457	0.393638	0.568678	1	8212	tags=69%, list=60%, signal=169%
GO_NUCLEAR_INNER_MEMBRANE	46	0.128953	1.04433	0.40159	0.567404	1	2124	tags=28%, list=15%, signal=33%
GO_PERICENTRIC_HETEROCHROMATIN	19	0.200598	1.03795	0.38833	0.575008	1	8124	tags=79%, list=59%, signal=192%
GO_IMMUNOLOGICAL_SYNAPSE	26	0.165923	1.03615	0.394958	0.57434	1	5141	tags=54%, list=37%, signal=86%
GO_SMOOTH_ENDOPLASMIC_RETICULUM	30	0.156442	1.02334	0.4	0.59235	1	4282	tags=47%, list=31%, signal=68%
GO_CCR4_NOT_COMPLEX	15	0.217712	1.02314	0.417647	0.588948	1	8952	tags=87%, list=65%, signal=247%
GO_SCHAFFER_COLLATERAL__CA1_SYNAPSE	81	0.0955156	1.0184	0.433134	0.593524	1	3627	tags=36%, list=26%, signal=48%
GO_RNA_POLYMERASE_III_COMPLEX	17	0.210328	1.01305	0.426854	0.598945	1	7648	tags=76%, list=55%, signal=171%
GO_MICROTUBULE	370	0.0467265	1.01271	0.431559	0.595844	1	3211	tags=28%, list=23%, signal=35%
GO_INTRINSIC_COMPONENT_OF_PRESYNAPTIC_MEMBRANE	79	0.0960482	1.00477	0.444015	0.60607	1	11251	tags=91%, list=82%, signal=492%
GO_DENDRITIC_SHAFT	35	0.141063	0.989148	0.452525	0.630071	1	4363	tags=46%, list=32%, signal=67%
GO_POSTSYNAPTIC_CYTOSOL	17	0.202654	0.988092	0.454936	0.628119	1	5320	tags=59%, list=39%, signal=96%
GO_U5_SNRNP	16	0.206606	0.986056	0.465726	0.627835	1	10944	tags=100%, list=79%, signal=484%
GO_EXOSOME_RNASE_COMPLEX_	24	0.164787	0.966026	0.504032	0.660169	1	7499	tags=71%, list=54%, signal=155%
GO_PLASMA_MEMBRANE_BOUNDED_CELL_PROJECTION_CYTOPLASM	175	0.0612544	0.956371	0.504184	0.673671	1	5233	tags=44%, list=38%, signal=70%
GO_PLASMA_MEMBRANE_RECEPTOR_COMPLEX	154	0.0646122	0.948271	0.49497	0.683981	1	4491	tags=39%, list=33%, signal=57%
GO_PROTEASOME_CORE_COMPLEX	18	0.190421	0.941235	0.520408	0.692861	1	9635	tags=89%, list=70%, signal=295%
GO_INTRINSIC_COMPONENT_OF_POSTSYNAPTIC_SPECIALIZATION_MEMBRANE	71	0.0958784	0.939849	0.51927	0.691252	1	8784	tags=73%, list=64%, signal=201%
GO_LARGE_RIBOSOMAL_SUBUNIT	111	0.075085	0.939072	0.542484	0.688632	1	9781	tags=78%, list=71%, signal=267%
GO_UBIQUITIN_LIGASE_COMPLEX	262	0.0504082	0.937461	0.519313	0.68767	1	7160	tags=57%, list=52%, signal=116%
GO_MICROTUBULE_END	27	0.150715	0.934169	0.511952	0.689589	1	10694	tags=93%, list=78%, signal=412%
GO_ROUGH_ENDOPLASMIC_RETICULUM_MEMBRANE	26	0.152628	0.914351	0.535642	0.722072	1	5324	tags=54%, list=39%, signal=88%
GO_ROUGH_ENDOPLASMIC_RETICULUM	72	0.0919072	0.905635	0.552743	0.733483	1	5059	tags=46%, list=37%, signal=72%
GO_AXON_CYTOPLASM	54	0.104762	0.90355	0.563745	0.733259	1	9797	tags=81%, list=71%, signal=280%
GO_PLASMA_MEMBRANE_RAFT	97	0.0789156	0.901428	0.593449	0.733142	1	10008	tags=80%, list=73%, signal=291%
GO_PODOSOME	28	0.139857	0.895975	0.573896	0.739309	1	9895	tags=86%, list=72%, signal=303%
GO_CLEAVAGE_FURROW	49	0.109135	0.895045	0.575884	0.736819	1	2721	tags=31%, list=20%, signal=38%
GO_CONDENSED_NUCLEAR_CHROMOSOME	71	0.0886554	0.892854	0.580122	0.736496	1	1502	tags=20%, list=11%, signal=22%
GO_CYTOSOLIC_LARGE_RIBOSOMAL_SUBUNIT	53	0.102411	0.886695	0.576846	0.743354	1	9781	tags=81%, list=71%, signal=278%
GO_EUKARYOTIC_TRANSLATION_INITIATION_FACTOR_3_COMPLEX	15	0.189794	0.886103	0.579681	0.740496	1	5659	tags=60%, list=41%, signal=102%
GO_POSTSYNAPTIC_DENSITY_MEMBRANE	74	0.0876463	0.881385	0.589354	0.744952	1	8115	tags=68%, list=59%, signal=163%
GO_TRANSCRIPTION_FACTOR_TFIID_COMPLEX	34	0.127336	0.880887	0.63964	0.74177	1	11227	tags=94%, list=81%, signal=505%
GO_RNA_POLYMERASE_II_HOLOENZYME	73	0.0867164	0.87135	0.607422	0.754825	1	11278	tags=90%, list=82%, signal=494%
GO_EXTRINSIC_COMPONENT_OF_CYTOPLASMIC_SIDE_OF_PLASMA_MEMBRANE	75	0.0871858	0.86693	0.623552	0.758207	1	2113	tags=24%, list=15%, signal=28%
GO_PROTEIN_LIPID_COMPLEX	18	0.167441	0.857227	0.620902	0.771158	1	7653	tags=72%, list=55%, signal=162%
GO_FICOLIN_1_RICH_GRANULE	116	0.0680167	0.856097	0.646	0.768877	1	10601	tags=84%, list=77%, signal=358%
GO_CYTOSOLIC_RIBOSOME	100	0.0721839	0.850524	0.649606	0.774621	1	12388	tags=97%, list=90%, signal=947%
GO_INTRINSIC_COMPONENT_OF_POSTSYNAPTIC_DENSITY_MEMBRANE	53	0.0986439	0.843328	0.646586	0.782768	1	11394	tags=92%, list=83%, signal=530%
GO_POSTSYNAPTIC_SPECIALIZATION_MEMBRANE	95	0.075176	0.840229	0.678501	0.784037	1	8115	tags=66%, list=59%, signal=160%
GO_NEURON_SPINE	153	0.0578718	0.837583	0.64381	0.784636	1	2004	tags=20%, list=15%, signal=23%
GO_NUCLEAR_OUTER_MEMBRANE	24	0.143831	0.834809	0.677083	0.785265	1	892	tags=21%, list=6%, signal=22%
GO_TERMINAL_BOUTON	45	0.101872	0.822474	0.681188	0.801831	1	4728	tags=44%, list=34%, signal=67%
GO_GLUTAMATERGIC_SYNAPSE	338	0.0392112	0.820372	0.688235	0.801482	1	6571	tags=51%, list=48%, signal=96%
GO_CARBOXY_TERMINAL_DOMAIN_PROTEIN_KINASE_COMPLEX	19	0.15606	0.817314	0.719439	0.80247	1	5834	tags=58%, list=42%, signal=100%
GO_SCF_UBIQUITIN_LIGASE_COMPLEX	57	0.0906548	0.81204	0.682474	0.806723	1	3109	tags=32%, list=23%, signal=41%
GO_SODIUM_CHANNEL_COMPLEX	19	0.154108	0.804438	0.71831	0.8151	1	780	tags=21%, list=6%, signal=22%
GO_ENDONUCLEASE_COMPLEX	28	0.126553	0.800965	0.728	0.816939	1	1705	tags=25%, list=12%, signal=28%
GO_VESICLE_COAT	53	0.0911588	0.776056	0.770751	0.852449	1	10456	tags=85%, list=76%, signal=350%
GO_SMN_SM_PROTEIN_COMPLEX	16	0.159496	0.770638	0.735521	0.856692	1	10731	tags=94%, list=78%, signal=422%
GO_FILOPODIUM_TIP	16	0.15358	0.76453	0.76701	0.861872	1	3917	tags=44%, list=28%, signal=61%
GO_COPII_COATED_ER_TO_GOLGI_TRANSPORT_VESICLE	73	0.0755182	0.754613	0.776181	0.872871	1	5953	tags=51%, list=43%, signal=89%
GO_PHOSPHATIDYLINOSITOL_3_KINASE_COMPLEX	25	0.127241	0.749835	0.788462	0.875775	1	6522	tags=60%, list=47%, signal=114%
GO_SYNAPTONEMAL_STRUCTURE	21	0.134713	0.720375	0.811881	0.913848	1	7338	tags=67%, list=53%, signal=142%
GO_SYNAPTIC_MEMBRANE	391	0.0328648	0.718915	0.841046	0.91152	1	6895	tags=53%, list=50%, signal=103%
GO_CELL_DIVISION_SITE	62	0.0771653	0.711046	0.846591	0.917485	1	2721	tags=27%, list=20%, signal=34%
GO_NEURON_PROJECTION_CYTOPLASM	80	0.0669928	0.70416	0.838207	0.92216	1	8217	tags=66%, list=60%, signal=163%
GO_PRESYNAPTIC_MEMBRANE	149	0.0504222	0.699731	0.858283	0.923466	1	11251	tags=87%, list=82%, signal=465%
GO_MYOFILAMENT	21	0.12187	0.685993	0.871744	0.935973	1	9485	tags=81%, list=69%, signal=259%
GO_MICROTUBULE_PLUS_END	20	0.126999	0.684412	0.873444	0.933542	1	10662	tags=90%, list=77%, signal=396%
GO_INTRINSIC_COMPONENT_OF_GOLGI_MEMBRANE	60	0.0735671	0.673829	0.874251	0.941692	1	3356	tags=32%, list=24%, signal=42%
GO_DYNEIN_COMPLEX	46	0.0842852	0.670865	0.878906	0.940885	1	5736	tags=50%, list=42%, signal=85%
GO_SMALL_NUCLEOLAR_RIBONUCLEOPROTEIN_COMPLEX	21	0.11772	0.658209	0.889597	0.950403	1	7572	tags=67%, list=55%, signal=148%
GO_CUL3_RING_UBIQUITIN_LIGASE_COMPLEX	37	0.0903757	0.657354	0.874759	0.94685	1	2856	tags=30%, list=21%, signal=37%
GO_EXOCYST	17	0.131834	0.656034	0.899193	0.943815	1	4673	tags=47%, list=34%, signal=71%
GO_PROTEIN_PHOSPHATASE_TYPE_2A_COMPLEX	18	0.126213	0.651789	0.885149	0.943793	1	8987	tags=78%, list=65%, signal=223%
GO_TRANS_GOLGI_NETWORK	204	0.038274	0.633964	0.920245	0.957521	1	4752	tags=38%, list=34%, signal=57%
GO_OUTER_MITOCHONDRIAL_MEMBRANE_PROTEIN_COMPLEX	16	0.131633	0.631993	0.925636	0.95499	1	8529	tags=75%, list=62%, signal=196%
GO_COATED_VESICLE	239	0.0355763	0.630416	0.925852	0.95217	1	11923	tags=90%, list=86%, signal=653%
GO_CILIARY_TIP	42	0.0814086	0.617115	0.928279	0.958867	1	12014	tags=95%, list=87%, signal=737%
GO_90S_PRERIBOSOME	28	0.0951905	0.602072	0.936902	0.966318	1	7062	tags=61%, list=51%, signal=124%
GO_DNA_REPAIR_COMPLEX	33	0.0846053	0.587278	0.939024	0.972505	1	8029	tags=67%, list=58%, signal=159%
GO_ER_TO_GOLGI_TRANSPORT_VESICLE_MEMBRANE	46	0.0724833	0.578743	0.955466	0.973915	1	4699	tags=41%, list=34%, signal=62%
GO_DNA_POLYMERASE_COMPLEX	15	0.122677	0.575397	0.970021	0.971737	1	2906	tags=33%, list=21%, signal=42%
GO_RETROMER_COMPLEX	20	0.0970046	0.522048	0.990099	0.99163	1	3490	tags=35%, list=25%, signal=47%
GO_HIPPOCAMPAL_MOSSY_FIBER_TO_CA3_SYNAPSE	31	0.0768872	0.512928	0.98773	0.990087	1	2500	tags=26%, list=18%, signal=31%
GO_CULLIN_RING_UBIQUITIN_LIGASE_COMPLEX	146	0.0350005	0.485646	0.99793	0.992242	1	6228	tags=49%, list=45%, signal=88%
GO_DNA_POLYMERASE_COMPLEX	15	0.168514	0.79105	0.728137	0.858511	1	8992	tags=80%, list=63%, signal=217%
GO_CILIARY_BASAL_BODY	104	0.0660803	0.787646	0.746888	0.860448	1	8237	tags=64%, list=58%, signal=152%
GO_AXON_CYTOPLASM	54	0.0902267	0.786304	0.735294	0.858936	1	7947	tags=65%, list=56%, signal=146%
GO_MICROTUBULE_PLUS_END	20	0.148291	0.785939	0.719536	0.855814	1	1450	tags=25%, list=10%, signal=28%
GO_INO80_TYPE_COMPLEX	23	0.134867	0.785055	0.751012	0.853573	1	1796	tags=26%, list=13%, signal=30%
GO_CILIARY_TRANSITION_ZONE	54	0.0905139	0.784849	0.731225	0.850261	1	11634	tags=91%, list=82%, signal=494%
GO_ATPASE_DEPENDENT_TRANSMEMBRANE_TRANSPORT_COMPLEX	16	0.165266	0.781969	0.71869	0.851238	1	1208	tags=25%, list=8%, signal=27%
GO_CILIARY_BASE	29	0.121398	0.775641	0.749487	0.857979	1	6620	tags=59%, list=46%, signal=109%
GO_GLIAL_CELL_PROJECTION	23	0.132616	0.772887	0.73913	0.858663	1	2447	tags=30%, list=17%, signal=37%
GO_PERINUCLEAR_ENDOPLASMIC_RETICULUM	19	0.14569	0.767571	0.752988	0.862969	1	8418	tags=74%, list=59%, signal=180%
GO_EXOCYST	18	0.150335	0.761595	0.761711	0.868604	1	3398	tags=39%, list=24%, signal=51%
GO_MAST_CELL_GRANULE	19	0.147711	0.751539	0.781818	0.880538	1	5392	tags=53%, list=38%, signal=85%
GO_HIPPOCAMPAL_MOSSY_FIBER_TO_CA3_SYNAPSE	31	0.112156	0.750974	0.805328	0.877733	1	702	tags=16%, list=5%, signal=17%
GO_CIS_GOLGI_NETWORK	44	0.0966738	0.744966	0.774737	0.883259	1	3804	tags=36%, list=27%, signal=49%
GO_CENTRIOLE	124	0.0551916	0.725503	0.816	0.907275	1	1746	tags=18%, list=12%, signal=20%
GO_DYNEIN_COMPLEX	47	0.0878953	0.719718	0.831216	0.911883	1	1478	tags=19%, list=10%, signal=21%
GO_AUTOPHAGOSOME_MEMBRANE	27	0.114768	0.710442	0.843327	0.920904	1	5223	tags=48%, list=37%, signal=76%
GO_INTRINSIC_COMPONENT_OF_SYNAPTIC_VESICLE_MEMBRANE	45	0.0870585	0.706085	0.836	0.923015	1	2560	tags=27%, list=18%, signal=32%
GO_CELL_CORTEX_REGION	38	0.0965376	0.701659	0.855422	0.925075	1	9868	tags=79%, list=69%, signal=257%
GO_COPI_COATED_VESICLE_MEMBRANE	17	0.14334	0.697287	0.846465	0.926994	1	3823	tags=41%, list=27%, signal=56%
GO_ACROSOMAL_VESICLE	71	0.0667905	0.677243	0.883674	0.948001	1	5269	tags=44%, list=37%, signal=69%
GO_AXONAL_GROWTH_CONE	25	0.112268	0.676684	0.88	0.945024	1	10932	tags=88%, list=77%, signal=378%
GO_MICROTUBULE_ORGANIZING_CENTER_PART	165	0.0453469	0.67485	0.864706	0.943496	1	1518	tags=15%, list=11%, signal=17%
GO_SPINDLE_MIDZONE	32	0.0995534	0.665694	0.902287	0.95041	1	2589	tags=28%, list=18%, signal=34%
GO_DENSE_CORE_GRANULE	18	0.129314	0.664095	0.876268	0.948393	1	2115	tags=28%, list=15%, signal=33%
GO_SCF_UBIQUITIN_LIGASE_COMPLEX	58	0.0722134	0.656916	0.90495	0.952428	1	3148	tags=29%, list=22%, signal=37%
GO_CILIARY_TIP	43	0.0844346	0.656223	0.90342	0.949461	1	456	tags=12%, list=3%, signal=12%
GO_RECYCLING_ENDOSOME	149	0.0463096	0.6472	0.90593	0.955294	1	2022	tags=19%, list=14%, signal=22%
GO_ACTIN_FILAMENT	92	0.0571757	0.64308	0.908738	0.955841	1	3678	tags=32%, list=26%, signal=42%
GO_GAP_JUNCTION	20	0.105223	0.566266	0.971429	1	1	3486	tags=35%, list=24%, signal=46%
GO_SPINDLE	307	0.0272972	0.557634	0.98125	1	1	13763	tags=99%, list=97%, signal=2920%
GO_MUSCLE_MYOSIN_COMPLEX	16	0.112347	0.556923	0.960938	1	1	4630	tags=44%, list=33%, signal=65%
GO_MICROTUBULE_ASSOCIATED_COMPLEX	138	0.0402629	0.553435	0.97314	1	1	12843	tags=94%, list=90%, signal=953%
GO_PHAGOCYTIC_VESICLE	118	0.0426946	0.536852	0.979675	1	1	6756	tags=52%, list=47%, signal=98%
GO_CORTICAL_CYTOSKELETON	103	0.0459856	0.533652	0.974155	1	1	8610	tags=65%, list=60%, signal=163%
GO_MICROVILLUS_MEMBRANE	15	0.112085	0.522633	0.984881	1	1	5998	tags=53%, list=42%, signal=92%
GO_CONDENSED_NUCLEAR_CHROMOSOME_CENTROMERIC_REGION	20	0.0947739	0.517208	0.980469	1	1	1499	tags=20%, list=11%, signal=22%
GO_TRANSCRIPTIONALLY_ACTIVE_CHROMATIN	21	0.0883445	0.488187	0.989899	1	1	99	tags=10%, list=1%, signal=10%
GO_SIN3_TYPE_COMPLEX	15	0.103366	0.480572	0.99044	1	1	6122	tags=53%, list=43%, signal=93%
GO_PROTEIN_LIPID_COMPLEX	21	0.0839966	0.445111	0.995976	1	1	11686	tags=90%, list=82%, signal=504%
GO_CELL_CORTEX	266	0.0232923	0.442093	0.997942	1	1	4223	tags=32%, list=30%, signal=45%
GO_SPINDLE_POLE	149	0.0268885	0.381621	1	1	1	1149	tags=11%, list=8%, signal=12%
GO_MYOSIN_FILAMENT	20	0.0720511	0.380861	1	0.999795	1	6805	tags=55%, list=48%, signal=105%

## Sheet: CC_Down
Supplementary Table 5. GSEA results (C5-CC, C5-BP, and C5-MF domains) for W3-HM Shank2-mutant transcripts.
NAME	SIZE	ES	NES	NOM p-val	FDR q-val	FWER p-val	RANK AT MAX	LEADING EDGE
GO_LYSOSOMAL_LUMEN	85	-0.290115	-3.05577	0	0.0010543	0.001	6084	tags=73%, list=44%, signal=130%
GO_VACUOLAR_PART	474	-0.120387	-3.01682	0	0.000527149	0.001	7650	tags=67%, list=55%, signal=145%
GO_APICAL_PLASMA_MEMBRANE	221	-0.168776	-2.91327	0	0.000698159	0.002	4263	tags=48%, list=31%, signal=68%
GO_RESPIRASOME	88	-0.255249	-2.83989	0	0.000766328	0.003	7160	tags=77%, list=52%, signal=160%
GO_VACUOLAR_LUMEN	139	-0.201231	-2.81198	0	0.000613062	0.003	6084	tags=64%, list=44%, signal=113%
GO_APICAL_PART_OF_CELL	274	-0.146422	-2.7509	0	0.000510885	0.003	4263	tags=45%, list=31%, signal=64%
GO_MYELIN_SHEATH	48	-0.327985	-2.73437	0	0.000584535	0.004	2389	tags=50%, list=17%, signal=60%
GO_MAIN_AXON	64	-0.297735	-2.72464	0	0.000637007	0.005	2594	tags=48%, list=19%, signal=59%
GO_INNER_MITOCHONDRIAL_MEMBRANE_PROTEIN_COMPLEX	118	-0.202238	-2.64864	0	0.0012544	0.01	7170	tags=72%, list=52%, signal=149%
GO_MITOCHONDRIAL_MATRIX	430	-0.111155	-2.63038	0	0.00143539	0.012	8811	tags=75%, list=64%, signal=200%
GO_EXTRACELLULAR_MATRIX	385	-0.117719	-2.62658	0	0.0013049	0.012	4190	tags=42%, list=30%, signal=58%
GO_RESPIRATORY_CHAIN_COMPLEX	75	-0.255617	-2.61903	0	0.00119616	0.012	7160	tags=77%, list=52%, signal=160%
GO_OXIDOREDUCTASE_COMPLEX	97	-0.224742	-2.57341	0	0.00173295	0.02	7160	tags=74%, list=52%, signal=153%
GO_ORGANELLE_INNER_MEMBRANE	462	-0.102451	-2.51428	0	0.00248016	0.032	6516	tags=57%, list=47%, signal=105%
GO_COLLAGEN_CONTAINING_EXTRACELLULAR_MATRIX	305	-0.125251	-2.51171	0	0.00238235	0.033	4190	tags=43%, list=30%, signal=60%
GO_MITOCHONDRIAL_MEMBRANE_PART	202	-0.151569	-2.46226	0	0.00318172	0.048	6885	tags=65%, list=50%, signal=128%
GO_COLLAGEN_TRIMER	68	-0.240484	-2.39607	0.00209644	0.0052483	0.085	5016	tags=60%, list=36%, signal=94%
GO_VACUOLAR_MEMBRANE	352	-0.104423	-2.30616	0	0.00901948	0.151	7648	tags=66%, list=55%, signal=144%
GO_PROTON_TRANSPORTING_TWO_SECTOR_ATPASE_COMPLEX_PROTON_TRANSPORTING_DOMAIN	19	-0.434719	-2.2655	0.00206612	0.0119413	0.204	3450	tags=68%, list=25%, signal=91%
GO_MITOCHONDRIAL_PROTEIN_COMPLEX	244	-0.126158	-2.21541	0	0.0159514	0.277	9483	tags=81%, list=69%, signal=255%
GO_CLUSTER_OF_ACTIN_BASED_CELL_PROJECTIONS	108	-0.180055	-2.17372	0	0.020022	0.35	2262	tags=34%, list=16%, signal=41%
GO_PROTON_TRANSPORTING_V_TYPE_ATPASE_COMPLEX	22	-0.382764	-2.16326	0.00199203	0.0201809	0.361	7268	tags=91%, list=53%, signal=192%
GO_MITOCHONDRIAL_RESPIRATORY_CHAIN_COMPLEX_I	47	-0.26025	-2.14731	0.00200803	0.0216475	0.397	8748	tags=89%, list=63%, signal=244%
GO_STEREOCILIUM_BUNDLE	42	-0.271807	-2.11092	0.00213675	0.0254608	0.463	6443	tags=74%, list=47%, signal=138%
GO_PROTON_TRANSPORTING_TWO_SECTOR_ATPASE_COMPLEX	40	-0.273856	-2.02841	0.00404858	0.0409913	0.646	7268	tags=80%, list=53%, signal=169%
GO_CONTRACTILE_FIBER	185	-0.12901	-2.01543	0.00394477	0.0428463	0.674	4433	tags=45%, list=32%, signal=65%
GO_SARCOPLASM	69	-0.20479	-1.99177	0.013834	0.0474393	0.73	1588	tags=32%, list=12%, signal=36%
GO_AXOLEMMA	15	-0.40903	-1.93846	0.00580271	0.06241	0.838	5399	tags=80%, list=39%, signal=131%
GO_CELL_CORTEX	263	-0.103118	-1.92804	0.00383877	0.0635844	0.86	1962	tags=24%, list=14%, signal=28%
GO_ENDOSOMAL_PART	447	-0.0798826	-1.91152	0.00803213	0.0678149	0.881	7512	tags=62%, list=54%, signal=132%
GO_PLATELET_DENSE_GRANULE	15	-0.398897	-1.88071	0.0141129	0.0779871	0.911	1861	tags=53%, list=13%, signal=62%
GO_ENDOLYSOSOME	17	-0.376835	-1.86525	0.00988142	0.0825802	0.934	6979	tags=88%, list=51%, signal=178%
GO_CHLORIDE_CHANNEL_COMPLEX	33	-0.266556	-1.82799	0.00592885	0.0987169	0.963	8871	tags=91%, list=64%, signal=254%
GO_PHOTORECEPTOR_CONNECTING_CILIUM	27	-0.29896	-1.81406	0.0142276	0.102768	0.974	3037	tags=52%, list=22%, signal=66%
GO_POTASSIUM_CHANNEL_COMPLEX	88	-0.162742	-1.78844	0.0139165	0.114232	0.982	3256	tags=40%, list=24%, signal=52%
GO_ATPASE_DEPENDENT_TRANSMEMBRANE_TRANSPORT_COMPLEX	15	-0.370717	-1.73483	0.023301	0.147538	0.996	4088	tags=67%, list=30%, signal=95%
GO_AZUROPHIL_GRANULE	122	-0.134611	-1.72755	0.020202	0.149579	0.996	6413	tags=60%, list=47%, signal=111%
GO_CALYX_OF_HELD	22	-0.306429	-1.71667	0.0433925	0.153658	0.996	3931	tags=59%, list=29%, signal=83%
GO_AXON_PART	354	-0.0769795	-1.70583	0.0240964	0.157609	0.997	1382	tags=18%, list=10%, signal=19%
GO_NON_MOTILE_CILIUM	95	-0.153432	-1.6996	0.0218254	0.158614	0.997	3416	tags=40%, list=25%, signal=53%
GO_ACTIN_BASED_CELL_PROJECTION	167	-0.113058	-1.67703	0.0238095	0.173178	0.997	2342	tags=28%, list=17%, signal=33%
GO_NODE_OF_RANVIER	15	-0.358043	-1.66543	0.04	0.17859	0.998	585	tags=40%, list=4%, signal=42%
GO_SARCOLEMMA	123	-0.125633	-1.64119	0.0336634	0.195696	0.999	2096	tags=28%, list=15%, signal=32%
GO_TRANSPORTER_COMPLEX	273	-0.0866984	-1.63336	0.0327553	0.198304	1	1860	tags=22%, list=13%, signal=25%
GO_A_BAND	29	-0.248846	-1.5789	0.0541082	0.25176	1	2283	tags=41%, list=17%, signal=49%
GO_I_BAND	110	-0.125668	-1.57841	0.0556701	0.247007	1	4425	tags=45%, list=32%, signal=65%
GO_AUTOPHAGOSOME	79	-0.148632	-1.57512	0.0404858	0.24576	1	8088	tags=73%, list=59%, signal=177%
GO_CLATHRIN_COATED_VESICLE_MEMBRANE	87	-0.144926	-1.56648	0.0618557	0.251016	1	7843	tags=71%, list=57%, signal=164%
GO_INCLUSION_BODY	69	-0.15904	-1.54081	0.0604288	0.276872	1	8012	tags=74%, list=58%, signal=176%
GO_COSTAMERE	16	-0.318008	-1.53781	0.0641283	0.275435	1	1654	tags=44%, list=12%, signal=50%
GO_MICROBODY	118	-0.117982	-1.53427	0.0748031	0.274626	1	10192	tags=86%, list=74%, signal=325%
GO_SECRETORY_GRANULE_MEMBRANE	230	-0.0852153	-1.53335	0.055336	0.270532	1	10178	tags=82%, list=74%, signal=308%
GO_TERTIARY_GRANULE_MEMBRANE	55	-0.170702	-1.53037	0.0705128	0.268534	1	10695	tags=95%, list=78%, signal=419%
GO_CLATHRIN_COATED_ENDOCYTIC_VESICLE_MEMBRANE	31	-0.231817	-1.52786	0.0603622	0.266479	1	4374	tags=55%, list=32%, signal=80%
GO_CELL_CORTEX_PART	150	-0.10717	-1.51378	0.0558882	0.278857	1	1757	tags=23%, list=13%, signal=26%
GO_CLATHRIN_COATED_ENDOCYTIC_VESICLE	43	-0.195145	-1.48607	0.0718447	0.312156	1	4374	tags=51%, list=32%, signal=75%
GO_AZUROPHIL_GRANULE_LUMEN	68	-0.153463	-1.48579	0.0824742	0.307068	1	6413	tags=62%, list=47%, signal=115%
GO_BASEMENT_MEMBRANE	85	-0.139769	-1.47438	0.0845666	0.316957	1	2466	tags=32%, list=18%, signal=38%
GO_SERINE_THREONINE_PROTEIN_KINASE_COMPLEX	78	-0.137747	-1.44286	0.0871287	0.355942	1	10135	tags=87%, list=73%, signal=327%
GO_LATE_ENDOSOME	215	-0.0836802	-1.4414	0.0909091	0.352159	1	7781	tags=65%, list=56%, signal=146%
GO_CENTRIOLAR_SATELLITE	27	-0.226767	-1.43548	0.0994152	0.354457	1	5563	tags=63%, list=40%, signal=105%
GO_T_TUBULE	50	-0.168701	-1.4304	0.0895795	0.355706	1	2096	tags=32%, list=15%, signal=38%
GO_GAMMA_TUBULIN_COMPLEX	19	-0.273453	-1.42414	0.0890269	0.359176	1	10026	tags=100%, list=73%, signal=366%
GO_CORTICAL_CYTOSKELETON	102	-0.119316	-1.41361	0.0910891	0.370031	1	1207	tags=21%, list=9%, signal=22%
GO_INTERMEDIATE_FILAMENT_CYTOSKELETON	92	-0.123224	-1.40482	0.1	0.377463	1	1311	tags=22%, list=10%, signal=24%
GO_CYTOCHROME_COMPLEX	26	-0.235972	-1.40024	0.115607	0.378442	1	9483	tags=92%, list=69%, signal=295%
GO_PERIKARYON	113	-0.11044	-1.3917	0.108911	0.386617	1	2884	tags=32%, list=21%, signal=40%
GO_PROTEIN_KINASE_COMPLEX	96	-0.120176	-1.39063	0.112474	0.382471	1	10135	tags=85%, list=73%, signal=320%
GO_GLIAL_CELL_PROJECTION	23	-0.244761	-1.39025	0.107071	0.377475	1	1428	tags=35%, list=10%, signal=39%
GO_AGGRESOME	34	-0.203537	-1.38747	0.106383	0.376561	1	7747	tags=76%, list=56%, signal=174%
GO_INTRINSIC_COMPONENT_OF_ORGANELLE_MEMBRANE	335	-0.0651472	-1.38192	0.137652	0.379516	1	9128	tags=73%, list=66%, signal=209%
GO_DESMOSOME	18	-0.267734	-1.38184	0.11691	0.374356	1	7806	tags=83%, list=57%, signal=192%
GO_9PLUS0_NON_MOTILE_CILIUM	72	-0.134892	-1.37496	0.107143	0.379356	1	10026	tags=86%, list=73%, signal=314%
GO_CORTICAL_ACTIN_CYTOSKELETON	77	-0.137706	-1.37455	0.134172	0.37475	1	7605	tags=69%, list=55%, signal=153%
GO_OUTER_MEMBRANE	180	-0.0894399	-1.37213	0.114754	0.373432	1	6905	tags=59%, list=50%, signal=116%
GO_EXOCYTIC_VESICLE	191	-0.0845472	-1.37207	0.102041	0.3686	1	3039	tags=30%, list=22%, signal=38%
GO_EXTERNAL_SIDE_OF_PLASMA_MEMBRANE	184	-0.0860008	-1.37004	0.115538	0.366546	1	3103	tags=31%, list=23%, signal=39%
GO_M_BAND	21	-0.247764	-1.36039	0.131737	0.375625	1	6440	tags=71%, list=47%, signal=134%
GO_PROTON_TRANSPORTING_ATP_SYNTHASE_COMPLEX	17	-0.275417	-1.35717	0.144603	0.376295	1	5131	tags=65%, list=37%, signal=103%
GO_CLATHRIN_COATED_VESICLE	151	-0.0948268	-1.34551	0.145263	0.389507	1	8206	tags=69%, list=60%, signal=168%
GO_ENDOSOME_LUMEN	19	-0.260345	-1.34164	0.151697	0.390642	1	8029	tags=84%, list=58%, signal=201%
GO_CELL_CELL_CONTACT_ZONE	69	-0.137133	-1.34007	0.135193	0.388389	1	7713	tags=70%, list=56%, signal=157%
GO_COP9_SIGNALOSOME	29	-0.208653	-1.33962	0.143969	0.384271	1	6165	tags=66%, list=45%, signal=118%
GO_AXON_INITIAL_SEGMENT	18	-0.260873	-1.33252	0.141988	0.39058	1	1005	tags=33%, list=7%, signal=36%
GO_SMALL_RIBOSOMAL_SUBUNIT	69	-0.132735	-1.31665	0.152577	0.411232	1	11371	tags=96%, list=82%, signal=542%
GO_CILIARY_TRANSITION_ZONE	54	-0.150817	-1.3157	0.154143	0.407948	1	3037	tags=37%, list=22%, signal=47%
GO_INTERCALATED_DISC	48	-0.16115	-1.30874	0.158898	0.414575	1	2096	tags=31%, list=15%, signal=37%
GO_TOR_COMPLEX	15	-0.278949	-1.30829	0.178357	0.410602	1	7191	tags=80%, list=52%, signal=167%
GO_MICROBODY_PART	90	-0.117361	-1.30384	0.168986	0.412791	1	10192	tags=86%, list=74%, signal=326%
GO_PARALLEL_FIBER_TO_PURKINJE_CELL_SYNAPSE	16	-0.267246	-1.29272	0.150097	0.426134	1	5801	tags=69%, list=42%, signal=119%
GO_CELL_CORTEX_REGION	38	-0.174639	-1.28441	0.172764	0.435604	1	3043	tags=39%, list=22%, signal=51%
GO_PRESYNAPSE	439	-0.0526086	-1.2788	0.172485	0.439399	1	4105	tags=35%, list=30%, signal=48%
GO_POSTSYNAPTIC_SPECIALIZATION_INTRACELLULAR_COMPONENT	21	-0.23076	-1.27317	0.158582	0.443972	1	9301	tags=90%, list=67%, signal=277%
GO_PRESYNAPTIC_ACTIVE_ZONE	66	-0.128521	-1.26231	0.163673	0.457703	1	3043	tags=35%, list=22%, signal=45%
GO_NEURON_PROJECTION_MEMBRANE	53	-0.146708	-1.26164	0.177734	0.454031	1	7353	tags=68%, list=53%, signal=145%
GO_MYOSIN_FILAMENT	18	-0.251168	-1.25852	0.189024	0.454267	1	2671	tags=44%, list=19%, signal=55%
GO_INTRINSIC_COMPONENT_OF_MITOCHONDRIAL_INNER_MEMBRANE	38	-0.171674	-1.25345	0.205589	0.457664	1	6713	tags=66%, list=49%, signal=128%
GO_MYOSIN_II_COMPLEX	18	-0.251168	-1.23785	0.194882	0.479514	1	2671	tags=44%, list=19%, signal=55%
GO_MICROVILLUS	61	-0.135873	-1.2354	0.196429	0.478728	1	5144	tags=51%, list=37%, signal=81%
GO_INTRINSIC_COMPONENT_OF_MITOCHONDRIAL_OUTER_MEMBRANE	19	-0.232501	-1.22419	0.216162	0.493178	1	10590	tags=100%, list=77%, signal=430%
GO_CYTOSOLIC_SMALL_RIBOSOMAL_SUBUNIT	41	-0.161882	-1.21821	0.214567	0.498824	1	6857	tags=66%, list=50%, signal=131%
GO_CELL_PROJECTION_MEMBRANE	271	-0.0643183	-1.20269	0.237323	0.522449	1	2541	tags=25%, list=18%, signal=30%
GO_BRUSH_BORDER	70	-0.122898	-1.20058	0.225941	0.521103	1	2255	tags=29%, list=16%, signal=34%
GO_CYCLIN_DEPENDENT_PROTEIN_KINASE_HOLOENZYME_COMPLEX	38	-0.160352	-1.19855	0.208511	0.520083	1	10135	tags=89%, list=73%, signal=337%
GO_INTRACILIARY_TRANSPORT_PARTICLE	28	-0.194302	-1.19542	0.237288	0.520848	1	6685	tags=68%, list=48%, signal=131%
GO_SPECIFIC_GRANULE_LUMEN	42	-0.156209	-1.19256	0.233471	0.521253	1	3107	tags=38%, list=23%, signal=49%
GO_INTRINSIC_COMPONENT_OF_PEROXISOMAL_MEMBRANE	16	-0.247482	-1.19163	0.235409	0.518084	1	9521	tags=94%, list=69%, signal=302%
GO_NEURON_PROJECTION_TERMINUS	123	-0.0915777	-1.18624	0.24948	0.523068	1	1216	tags=18%, list=9%, signal=19%
GO_TERTIARY_GRANULE	120	-0.094492	-1.18516	0.252896	0.520035	1	5145	tags=47%, list=37%, signal=74%
GO_POSTSYNAPTIC_DENSITY_INTRACELLULAR_COMPONENT	17	-0.236353	-1.18214	0.239766	0.520783	1	8914	tags=88%, list=65%, signal=249%
GO_AUTOPHAGOSOME_MEMBRANE	27	-0.191756	-1.18091	0.226415	0.518367	1	8088	tags=78%, list=59%, signal=188%
GO_DISTAL_AXON	261	-0.0624598	-1.17889	0.249501	0.517258	1	1428	tags=16%, list=10%, signal=18%
GO_TRANS_GOLGI_NETWORK_MEMBRANE	80	-0.108876	-1.17489	0.267635	0.519667	1	9541	tags=80%, list=69%, signal=258%
GO_EARLY_ENDOSOME_MEMBRANE	123	-0.0913243	-1.17074	0.259557	0.522336	1	4471	tags=41%, list=32%, signal=61%
GO_MICROTUBULE_ORGANIZING_CENTER_PART	163	-0.0782546	-1.16741	0.254545	0.523451	1	8749	tags=71%, list=63%, signal=192%
GO_PHAGOCYTIC_VESICLE_MEMBRANE	65	-0.124906	-1.16375	0.251012	0.525361	1	8895	tags=77%, list=64%, signal=216%
GO_LATE_ENDOSOME_MEMBRANE	113	-0.0950451	-1.16371	0.259615	0.520948	1	9807	tags=81%, list=71%, signal=276%
GO_RIBOSOMAL_SUBUNIT	178	-0.0755809	-1.16334	0.253731	0.517217	1	11446	tags=90%, list=83%, signal=525%
GO_MYOSIN_COMPLEX	52	-0.13544	-1.16318	0.267191	0.513159	1	2914	tags=35%, list=21%, signal=44%
GO_CELL_BODY_MEMBRANE	24	-0.202559	-1.16092	0.232653	0.512652	1	2384	tags=38%, list=17%, signal=45%
GO_BLOOD_MICROPARTICLE	60	-0.125508	-1.15585	0.279297	0.517343	1	10000	tags=85%, list=73%, signal=308%
GO_ORGANELLE_ENVELOPE_LUMEN	79	-0.108906	-1.15502	0.26569	0.514474	1	9331	tags=78%, list=68%, signal=241%
GO_EXTRINSIC_COMPONENT_OF_ORGANELLE_MEMBRANE	42	-0.150115	-1.14902	0.250513	0.520191	1	10743	tags=93%, list=78%, signal=419%
GO_ENDOPLASMIC_RETICULUM_SUBCOMPARTMENT	22	-0.200031	-1.14341	0.272366	0.525703	1	5396	tags=59%, list=39%, signal=97%
GO_BRUSH_BORDER_MEMBRANE	34	-0.166089	-1.14065	0.275449	0.526146	1	4206	tags=47%, list=30%, signal=68%
GO_AP_TYPE_MEMBRANE_COAT_ADAPTOR_COMPLEX	44	-0.143332	-1.13345	0.297571	0.534822	1	7747	tags=70%, list=56%, signal=160%
GO_SYNAPTIC_VESICLE_MEMBRANE	98	-0.0954145	-1.12478	0.295635	0.546269	1	9671	tags=80%, list=70%, signal=265%
GO_INTRINSIC_COMPONENT_OF_MITOCHONDRIAL_MEMBRANE	65	-0.116769	-1.12351	0.310484	0.544287	1	6885	tags=62%, list=50%, signal=122%
GO_CORNIFIED_ENVELOPE	17	-0.222307	-1.12175	0.299213	0.543333	1	7485	tags=76%, list=54%, signal=167%
GO_RECEPTOR_COMPLEX	324	-0.0547903	-1.12147	0.296724	0.53959	1	4754	tags=40%, list=34%, signal=59%
GO_ENDOPLASMIC_RETICULUM_LUMEN	245	-0.0607544	-1.11732	0.311203	0.542696	1	4807	tags=41%, list=35%, signal=62%
GO_BASOLATERAL_PLASMA_MEMBRANE	172	-0.0725406	-1.11603	0.299795	0.541036	1	2541	tags=26%, list=18%, signal=31%
GO_RESPIRATORY_CHAIN_COMPLEX_IV	15	-0.246051	-1.11075	0.332024	0.546203	1	9483	tags=93%, list=69%, signal=298%
GO_INTEGRATOR_COMPLEX	15	-0.238647	-1.10394	0.302326	0.55467	1	4988	tags=60%, list=36%, signal=94%
GO_ENDOCYTIC_VESICLE_MEMBRANE	141	-0.0782418	-1.1035	0.327519	0.551394	1	3530	tags=33%, list=26%, signal=44%
GO_MICROTUBULE_ASSOCIATED_COMPLEX	137	-0.0817952	-1.09972	0.329457	0.554371	1	5830	tags=50%, list=42%, signal=86%
GO_CLATHRIN_ADAPTOR_COMPLEX	27	-0.179421	-1.09677	0.334694	0.555344	1	7747	tags=74%, list=56%, signal=169%
GO_CLATHRIN_COATED_PIT	63	-0.120695	-1.09497	0.341176	0.5545	1	7757	tags=68%, list=56%, signal=155%
GO_PHOTORECEPTOR_OUTER_SEGMENT	52	-0.127179	-1.08448	0.344554	0.569097	1	9923	tags=85%, list=72%, signal=301%
GO_MICROBODY_LUMEN	42	-0.143709	-1.08341	0.342	0.56701	1	9846	tags=86%, list=71%, signal=299%
GO_ANAPHASE_PROMOTING_COMPLEX	21	-0.191368	-1.06821	0.346457	0.590476	1	8530	tags=81%, list=62%, signal=212%
GO_CILIUM	450	-0.04426	-1.06701	0.357564	0.588242	1	3793	tags=32%, list=28%, signal=42%
GO_ACTIN_CYTOSKELETON	430	-0.0441464	-1.06216	0.356589	0.592765	1	2009	tags=19%, list=15%, signal=21%
GO_PRESYNAPTIC_ACTIVE_ZONE_CYTOPLASMIC_COMPONENT	16	-0.217173	-1.05199	0.374477	0.606722	1	3043	tags=44%, list=22%, signal=56%
GO_INTRACILIARY_TRANSPORT_PARTICLE_B	20	-0.191355	-1.03807	0.384615	0.629195	1	6330	tags=65%, list=46%, signal=120%
GO_VESICLE_LUMEN	259	-0.0560313	-1.03631	0.399602	0.628261	1	4461	tags=38%, list=32%, signal=55%
GO_ACTIN_FILAMENT	92	-0.0907913	-1.03408	0.40121	0.628144	1	2205	tags=25%, list=16%, signal=30%
GO_CENTRIOLE	122	-0.0810977	-1.03381	0.411765	0.624572	1	8614	tags=70%, list=62%, signal=186%
GO_NUCLEOID	40	-0.140097	-1.03277	0.389796	0.62247	1	8073	tags=73%, list=59%, signal=174%
GO_DENDRITE_MEMBRANE	36	-0.142924	-1.0313	0.410359	0.621129	1	2249	tags=31%, list=16%, signal=36%
GO_MULTIVESICULAR_BODY	33	-0.153352	-1.02238	0.392484	0.63333	1	7921	tags=73%, list=57%, signal=170%
GO_LEADING_EDGE_MEMBRANE	153	-0.0715173	-1.01875	0.421053	0.635546	1	2541	tags=25%, list=18%, signal=31%
GO_EXTRINSIC_COMPONENT_OF_MEMBRANE	246	-0.0540691	-1.00849	0.42268	0.650642	1	4202	tags=36%, list=30%, signal=51%
GO_SPECIFIC_GRANULE	124	-0.0788431	-1.00693	0.451485	0.64916	1	7376	tags=61%, list=53%, signal=131%
GO_APICAL_DENDRITE	16	-0.205481	-0.998816	0.430894	0.659627	1	4066	tags=50%, list=29%, signal=71%
GO_TRANSPORT_VESICLE_MEMBRANE	177	-0.0640679	-0.986614	0.449393	0.67949	1	9959	tags=79%, list=72%, signal=279%
GO_PHAGOCYTIC_VESICLE	116	-0.0779556	-0.973192	0.478516	0.70087	1	7376	tags=61%, list=53%, signal=130%
GO_ENDOCYTIC_VESICLE	251	-0.0528027	-0.967205	0.48381	0.708037	1	12143	tags=93%, list=88%, signal=766%
GO_CELL_LEADING_EDGE	365	-0.0437821	-0.964897	0.483806	0.707941	1	2587	tags=23%, list=19%, signal=28%
GO_CLATHRIN_COAT_OF_COATED_PIT	19	-0.185468	-0.961713	0.507071	0.70942	1	5431	tags=58%, list=39%, signal=95%
GO_SARCOPLASMIC_RETICULUM_MEMBRANE	33	-0.140507	-0.961375	0.497087	0.705669	1	2247	tags=30%, list=16%, signal=36%
GO_CLATHRIN_COAT_OF_ENDOCYTIC_VESICLE	15	-0.207027	-0.956395	0.495745	0.710439	1	6343	tags=67%, list=46%, signal=123%
GO_EXCITATORY_SYNAPSE	47	-0.118124	-0.955524	0.489022	0.707638	1	6300	tags=57%, list=46%, signal=105%
GO_CILIARY_BASAL_BODY	103	-0.0805049	-0.955424	0.490458	0.703496	1	7736	tags=64%, list=56%, signal=145%
GO_COMPLEX_OF_COLLAGEN_TRIMERS	19	-0.182831	-0.955384	0.488753	0.699311	1	6919	tags=68%, list=50%, signal=137%
GO_CYTOPLASMIC_REGION	431	-0.0400314	-0.951283	0.478682	0.702534	1	1962	tags=18%, list=14%, signal=20%
GO_FILAMENTOUS_ACTIN	23	-0.164202	-0.94889	0.482688	0.702755	1	7334	tags=70%, list=53%, signal=148%
GO_LIPID_DROPLET	66	-0.0978837	-0.943312	0.497942	0.709107	1	5762	tags=52%, list=42%, signal=88%
GO_SIDE_OF_MEMBRANE	346	-0.0441022	-0.937237	0.488142	0.716072	1	2517	tags=23%, list=18%, signal=27%
GO_INTRINSIC_COMPONENT_OF_ENDOPLASMIC_RETICULUM_MEMBRANE	132	-0.0685462	-0.93506	0.551653	0.716106	1	7005	tags=58%, list=51%, signal=116%
GO_SPECIFIC_GRANULE_MEMBRANE	75	-0.0894342	-0.93493	0.525151	0.712202	1	5394	tags=48%, list=39%, signal=78%
GO_PHAGOPHORE_ASSEMBLY_SITE_MEMBRANE	16	-0.190526	-0.930449	0.529297	0.716313	1	4272	tags=50%, list=31%, signal=72%
GO_CILIARY_PART	343	-0.0435585	-0.930199	0.531008	0.712565	1	6170	tags=49%, list=45%, signal=86%
GO_KINESIN_COMPLEX	48	-0.111056	-0.929429	0.544231	0.709947	1	4221	tags=42%, list=31%, signal=60%
GO_SPERM_PART	116	-0.0717513	-0.928	0.53125	0.708528	1	1992	tags=22%, list=14%, signal=25%
GO_MICROBODY_MEMBRANE	58	-0.106315	-0.922583	0.521042	0.714616	1	10192	tags=84%, list=74%, signal=322%
GO_TERTIARY_GRANULE_LUMEN	40	-0.121168	-0.91131	0.564547	0.730989	1	4196	tags=43%, list=30%, signal=61%
GO_BLOC_COMPLEX	19	-0.163902	-0.863213	0.62449	0.816102	1	5728	tags=58%, list=42%, signal=99%
GO_ENDOPLASMIC_RETICULUM_TUBULAR_NETWORK	18	-0.167623	-0.862162	0.611002	0.813563	1	5354	tags=56%, list=39%, signal=91%
GO_EXTRACELLULAR_MATRIX_COMPONENT	47	-0.106442	-0.861188	0.629191	0.810865	1	4700	tags=45%, list=34%, signal=68%
GO_INTERCELLULAR_BRIDGE	52	-0.0976193	-0.844609	0.640086	0.837119	1	7677	tags=65%, list=56%, signal=147%
GO_TRANSPORT_VESICLE	340	-0.0401109	-0.843893	0.676707	0.833837	1	8020	tags=62%, list=58%, signal=145%
GO_SNARE_COMPLEX	42	-0.111302	-0.841309	0.671315	0.833903	1	11605	tags=95%, list=84%, signal=599%
GO_PIGMENT_GRANULE	96	-0.0732452	-0.837575	0.676113	0.835961	1	2302	tags=24%, list=17%, signal=29%
GO_ORGANELLAR_LARGE_RIBOSOMAL_SUBUNIT	57	-0.0936017	-0.834818	0.654886	0.836382	1	10087	tags=82%, list=73%, signal=306%
GO_PERINUCLEAR_ENDOPLASMIC_RETICULUM	18	-0.165299	-0.832768	0.648393	0.835602	1	5386	tags=56%, list=39%, signal=91%
GO_ESCRT_COMPLEX	26	-0.135366	-0.830083	0.675	0.835739	1	9807	tags=85%, list=71%, signal=292%
GO_AZUROPHIL_GRANULE_MEMBRANE	48	-0.100879	-0.823908	0.668024	0.842265	1	7234	tags=63%, list=52%, signal=131%
GO_MOTILE_CILIUM	119	-0.064134	-0.822654	0.667984	0.839998	1	9902	tags=78%, list=72%, signal=275%
GO_TIGHT_JUNCTION	104	-0.0684022	-0.81951	0.679849	0.84116	1	8745	tags=70%, list=63%, signal=190%
GO_GABA_ERGIC_SYNAPSE	67	-0.0838416	-0.811789	0.694779	0.849898	1	10583	tags=85%, list=77%, signal=364%
GO_PLATELET_ALPHA_GRANULE	68	-0.0833348	-0.80482	0.68357	0.857087	1	3522	tags=34%, list=26%, signal=45%
GO_CILIARY_MEMBRANE	62	-0.0873898	-0.795857	0.708494	0.867775	1	9923	tags=81%, list=72%, signal=286%
GO_ANCHORED_COMPONENT_OF_MEMBRANE	104	-0.0643894	-0.777612	0.738337	0.893996	1	1374	tags=16%, list=10%, signal=18%
GO_RUFFLE_MEMBRANE	83	-0.0712934	-0.777203	0.752941	0.890054	1	2513	tags=25%, list=18%, signal=31%
GO_APICAL_JUNCTION_COMPLEX	120	-0.0611916	-0.776652	0.757874	0.886384	1	9048	tags=72%, list=66%, signal=207%
GO_RECYCLING_ENDOSOME	148	-0.0552209	-0.775106	0.753086	0.884436	1	1484	tags=16%, list=11%, signal=18%
GO_CLATHRIN_COAT	44	-0.0977321	-0.774713	0.743381	0.880605	1	7747	tags=66%, list=56%, signal=150%
GO_INTEGRAL_COMPONENT_OF_SYNAPTIC_VESICLE_MEMBRANE	32	-0.113946	-0.756771	0.755319	0.905888	1	1450	tags=22%, list=11%, signal=24%
GO_INTRINSIC_COMPONENT_OF_EXTERNAL_SIDE_OF_PLASMA_MEMBRANE	16	-0.154247	-0.755642	0.757515	0.903192	1	1324	tags=25%, list=10%, signal=28%
GO_INTRINSIC_COMPONENT_OF_SYNAPTIC_VESICLE_MEMBRANE	45	-0.0952422	-0.751801	0.787018	0.904473	1	1450	tags=20%, list=11%, signal=22%
GO_CELL_CELL_JUNCTION	378	-0.0336324	-0.749307	0.79596	0.904127	1	1593	tags=15%, list=12%, signal=16%
GO_BASAL_PART_OF_CELL	41	-0.0979264	-0.748886	0.764023	0.900292	1	3700	tags=37%, list=27%, signal=50%
GO_9PLUS2_MOTILE_CILIUM	60	-0.0824957	-0.746768	0.813808	0.899073	1	2316	tags=25%, list=17%, signal=30%
GO_NEUROMUSCULAR_JUNCTION	72	-0.0734079	-0.743381	0.778455	0.899671	1	3974	tags=36%, list=29%, signal=50%
GO_ORGANELLE_SUBCOMPARTMENT	316	-0.0358298	-0.722947	0.815029	0.925655	1	11258	tags=85%, list=82%, signal=453%
GO_CYTOPLASMIC_DYNEIN_COMPLEX	19	-0.138542	-0.715532	0.802966	0.931723	1	11884	tags=100%, list=86%, signal=722%
GO_PLATELET_ALPHA_GRANULE_MEMBRANE	15	-0.153005	-0.712008	0.841667	0.932118	1	8926	tags=80%, list=65%, signal=227%
GO_DENDRITE_CYTOPLASM	32	-0.103471	-0.709544	0.84879	0.931112	1	3318	tags=34%, list=24%, signal=45%
GO_EARLY_ENDOSOME	296	-0.0353657	-0.707928	0.84507	0.928749	1	4509	tags=36%, list=33%, signal=53%
GO_SITE_OF_POLARIZED_GROWTH	162	-0.0472427	-0.698743	0.844758	0.936227	1	8466	tags=66%, list=61%, signal=169%
GO_LUMENAL_SIDE_OF_MEMBRANE	20	-0.128676	-0.691612	0.851638	0.941013	1	12020	tags=100%, list=87%, signal=778%
GO_MAST_CELL_GRANULE	17	-0.139197	-0.68783	0.871369	0.941627	1	9441	tags=82%, list=68%, signal=261%
GO_FICOLIN_1_RICH_GRANULE_MEMBRANE	40	-0.0919951	-0.68761	0.84413	0.937512	1	9424	tags=78%, list=68%, signal=244%
GO_COATED_VESICLE_MEMBRANE	144	-0.0484936	-0.678382	0.88843	0.944387	1	9874	tags=76%, list=72%, signal=266%
GO_COATED_MEMBRANE	91	-0.0609056	-0.673758	0.871154	0.94562	1	11139	tags=87%, list=81%, signal=448%
GO_TETHERING_COMPLEX	63	-0.0710955	-0.669327	0.866142	0.946453	1	3622	tags=33%, list=26%, signal=45%
GO_RUFFLE	159	-0.0447837	-0.646112	0.894325	0.967252	1	2513	tags=23%, list=18%, signal=27%
GO_TRANSCRIPTIONALLY_ACTIVE_CHROMATIN	21	-0.117346	-0.64608	0.911157	0.962877	1	10206	tags=86%, list=74%, signal=329%
GO_RECYCLING_ENDOSOME_MEMBRANE	69	-0.0664943	-0.645899	0.882692	0.958708	1	10681	tags=84%, list=77%, signal=371%
GO_CLATHRIN_VESICLE_COAT	26	-0.106466	-0.642834	0.905462	0.957209	1	5431	tags=50%, list=39%, signal=82%
GO_CONDENSED_NUCLEAR_CHROMOSOME_CENTROMERIC_REGION	20	-0.113706	-0.6296	0.948875	0.965652	1	3262	tags=35%, list=24%, signal=46%
GO_GAP_JUNCTION	18	-0.122897	-0.624132	0.918629	0.966206	1	1373	tags=22%, list=10%, signal=25%
GO_BASAL_PLASMA_MEMBRANE	27	-0.102352	-0.623729	0.9125	0.962306	1	3700	tags=37%, list=27%, signal=51%
GO_PHOTORECEPTOR_INNER_SEGMENT	36	-0.0863262	-0.619633	0.913386	0.961585	1	9923	tags=81%, list=72%, signal=286%
GO_PROTEIN_COMPLEX_INVOLVED_IN_CELL_ADHESION	28	-0.0984005	-0.615968	0.913131	0.960339	1	2587	tags=29%, list=19%, signal=35%
GO_PHAGOPHORE_ASSEMBLY_SITE	30	-0.0905021	-0.591257	0.95619	0.974775	1	4272	tags=40%, list=31%, signal=58%
GO_GROWTH_CONE_PART	16	-0.121452	-0.586065	0.940574	0.97407	1	12119	tags=100%, list=88%, signal=824%
GO_PLATELET_ALPHA_GRANULE_LUMEN	49	-0.0689856	-0.578723	0.953722	0.974559	1	12844	tags=100%, list=93%, signal=1451%
GO_ACROSOMAL_VESICLE	66	-0.0586057	-0.559572	0.959267	0.9807	1	2122	tags=21%, list=15%, signal=25%
GO_ANCHORED_COMPONENT_OF_PLASMA_MEMBRANE	40	-0.0711403	-0.530183	0.981096	0.988856	1	9366	tags=75%, list=68%, signal=233%
GO_DENSE_CORE_GRANULE	18	-0.0993368	-0.50368	0.996205	0.992508	1	3996	tags=39%, list=29%, signal=55%
GO_INVADOPODIUM	15	-0.0939895	-0.439017	0.993711	0.997937	1	9739	tags=80%, list=71%, signal=272%

## Sheet: BP_Up
Supplementary Table 5. GSEA results (C5-CC, C5-BP, and C5-MF domains) for W3-HM Shank2-mutant transcripts.
NAME	SIZE	ES	NES	NOM p-val	FDR q-val	FWER p-val	RANK AT MAX	LEADING EDGE
GO_RNA_LOCALIZATION	211	0.237045	3.97209	0	0	0	7499	tags=78%, list=54%, signal=168%
GO_MRNA_METABOLIC_PROCESS	476	0.145412	3.66341	0	0	0	6378	tags=60%, list=46%, signal=108%
GO_RIBONUCLEOPROTEIN_COMPLEX_BIOGENESIS	410	0.154463	3.59589	0	0	0	4794	tags=50%, list=35%, signal=74%
GO_RNA_SPLICING_VIA_TRANSESTERIFICATION_REACTIONS	312	0.172771	3.47668	0	0	0	6378	tags=63%, list=46%, signal=115%
GO_COVALENT_CHROMATIN_MODIFICATION	405	0.152263	3.45876	0	0	0	7938	tags=72%, list=58%, signal=165%
GO_NUCLEAR_EXPORT	185	0.213707	3.44223	0	0	0	7155	tags=73%, list=52%, signal=150%
GO_ESTABLISHMENT_OF_RNA_LOCALIZATION	179	0.218783	3.41426	0	0	0	7499	tags=76%, list=54%, signal=164%
GO_NUCLEAR_TRANSPORT	307	0.166711	3.33479	0	0	0	5837	tags=59%, list=42%, signal=99%
GO_RNA_SPLICING	390	0.142235	3.26579	0	0	0	5731	tags=55%, list=42%, signal=92%
GO_HISTONE_METHYLATION	117	0.253586	3.21323	0	0.000214506	0.002	4311	tags=56%, list=31%, signal=81%
GO_RNA_EXPORT_FROM_NUCLEUS	129	0.243074	3.1717	0	0.000195006	0.002	7155	tags=76%, list=52%, signal=156%
GO_PEPTIDYL_LYSINE_MODIFICATION	338	0.153054	3.16941	0	0.000178755	0.002	7814	tags=72%, list=57%, signal=161%
GO_MRNA_TRANSPORT	135	0.216564	2.99332	0	0.000825042	0.01	7155	tags=73%, list=52%, signal=151%
GO_MRNA_SPLICE_SITE_SELECTION	27	0.476016	2.98587	0	0.000766111	0.01	5195	tags=85%, list=38%, signal=136%
GO_MRNA_3_END_PROCESSING	96	0.256998	2.94679	0	0.000715037	0.01	6679	tags=74%, list=48%, signal=142%
GO_HISTONE_H3_K4_METHYLATION	45	0.365716	2.91558	0	0.000670347	0.01	7537	tags=91%, list=55%, signal=200%
GO_MRNA_EXPORT_FROM_NUCLEUS	103	0.240186	2.8316	0	0.00151332	0.022	7155	tags=76%, list=52%, signal=156%
GO_REGULATION_OF_DNA_TEMPLATED_TRANSCRIPTION_INITIATION	31	0.421458	2.82914	0	0.00142925	0.022	7101	tags=94%, list=51%, signal=192%
GO_REGULATION_OF_GENE_EXPRESSION_EPIGENETIC	263	0.154648	2.82706	0	0.00140818	0.023	7870	tags=72%, list=57%, signal=165%
GO_REGULATION_OF_TRANSCRIPTION_INITIATION_FROM_RNA_POLYMERASE_II_PROMOTER	24	0.460113	2.67873	0	0.00503582	0.09	6881	tags=96%, list=50%, signal=191%
GO_PROTEIN_CONTAINING_COMPLEX_LOCALIZATION	267	0.141578	2.66875	0	0.00510332	0.094	7175	tags=66%, list=52%, signal=135%
GO_RIBONUCLEOPROTEIN_COMPLEX_SUBUNIT_ORGANIZATION	228	0.151699	2.65826	0	0.00535758	0.103	9434	tags=83%, list=68%, signal=259%
GO_RIBOSOME_BIOGENESIS	259	0.141804	2.64746	0	0.00545068	0.11	4736	tags=48%, list=34%, signal=72%
GO_NUCLEOBASE_CONTAINING_COMPOUND_TRANSPORT	213	0.15726	2.64223	0	0.00553431	0.117	6475	tags=62%, list=47%, signal=116%
GO_REGULATION_OF_MRNA_PROCESSING	123	0.20034	2.63049	0	0.00586964	0.129	6679	tags=68%, list=48%, signal=131%
GO_PEPTIDYL_LYSINE_ACETYLATION	150	0.181972	2.55955	0.00197628	0.00901187	0.199	7814	tags=75%, list=57%, signal=170%
GO_CHROMATIN_REMODELING	139	0.188434	2.53571	0	0.0101001	0.227	6852	tags=68%, list=50%, signal=134%
GO_MAINTENANCE_OF_CELL_NUMBER	130	0.18859	2.52147	0	0.0111169	0.255	4106	tags=48%, list=30%, signal=68%
GO_PROTEIN_METHYLATION	149	0.179201	2.49248	0	0.0131279	0.304	4311	tags=49%, list=31%, signal=71%
GO_PROTEIN_ACETYLATION	174	0.165297	2.48006	0	0.0139356	0.321	7814	tags=73%, list=57%, signal=166%
GO_POSITIVE_REGULATION_OF_TRANSCRIPTION_INITIATION_FROM_RNA_POLYMERASE_II_PROMOTER	16	0.501561	2.46936	0	0.0143834	0.338	6881	tags=100%, list=50%, signal=199%
GO_POSITIVE_REGULATION_OF_HISTONE_METHYLATION	32	0.367852	2.43973	0	0.0167436	0.391	4850	tags=72%, list=35%, signal=111%
GO_REGULATION_OF_RNA_METABOLIC_PROCESS	198	0.147216	2.4109	0	0.0198089	0.449	5172	tags=52%, list=38%, signal=82%
GO_POSITIVE_REGULATION_OF_DNA_TEMPLATED_TRANSCRIPTION_INITIATION	22	0.440274	2.4053	0.00201613	0.0196366	0.457	7101	tags=95%, list=51%, signal=196%
GO_REGULATION_OF_NUCLEOBASE_CONTAINING_COMPOUND_METABOLIC_PROCESS	436	0.101373	2.40475	0	0.0192289	0.459	4655	tags=44%, list=34%, signal=64%
GO_RNA_CATABOLIC_PROCESS	357	0.108635	2.40253	0	0.0189318	0.462	9781	tags=82%, list=71%, signal=273%
GO_REGULATION_OF_PROTEIN_IMPORT	53	0.276727	2.38936	0	0.0198643	0.487	5825	tags=70%, list=42%, signal=120%
GO_MACROMOLECULE_METHYLATION	248	0.129248	2.38309	0	0.0200706	0.499	4588	tags=46%, list=33%, signal=68%
GO_KIDNEY_EPITHELIUM_DEVELOPMENT	114	0.185153	2.37046	0.00188324	0.0216935	0.53	5088	tags=55%, list=37%, signal=87%
GO_ALTERNATIVE_MRNA_SPLICING_VIA_SPLICEOSOME	69	0.245943	2.36151	0.00199601	0.0224598	0.55	3020	tags=46%, list=22%, signal=59%
GO_REGULATION_OF_NUCLEOCYTOPLASMIC_TRANSPORT	99	0.196872	2.32361	0	0.0290404	0.65	5383	tags=59%, list=39%, signal=95%
GO_POSITIVE_REGULATION_OF_NUCLEOCYTOPLASMIC_TRANSPORT	58	0.260624	2.3212	0.00192308	0.0290105	0.662	4742	tags=60%, list=34%, signal=92%
GO_TELOMERASE_RNA_LOCALIZATION	19	0.444693	2.32005	0	0.0285584	0.663	6214	tags=89%, list=45%, signal=163%
GO_PROTEIN_LOCALIZATION_TO_CHROMOSOME_TELOMERIC_REGION	27	0.378322	2.31074	0	0.0299537	0.697	3475	tags=63%, list=25%, signal=84%
GO_RNA_POLYMERASE_II_PREINITIATION_COMPLEX_ASSEMBLY	25	0.381671	2.30159	0.0019802	0.0309785	0.722	6881	tags=88%, list=50%, signal=175%
GO_MORPHOGENESIS_OF_AN_EPITHELIUM	435	0.0976846	2.28654	0	0.033607	0.756	6747	tags=58%, list=49%, signal=111%
GO_PROTEIN_SUMOYLATION	67	0.232907	2.28577	0	0.0330739	0.757	3801	tags=51%, list=28%, signal=70%
GO_NEPHRON_DEVELOPMENT	118	0.177538	2.27569	0	0.0347436	0.783	5402	tags=57%, list=39%, signal=93%
GO_METANEPHROS_DEVELOPMENT	68	0.235092	2.26781	0	0.0356952	0.803	5088	tags=60%, list=37%, signal=95%
GO_RNA_3_END_PROCESSING	129	0.17153	2.26758	0	0.0350239	0.803	7491	tags=71%, list=54%, signal=155%
GO_POSITIVE_REGULATION_OF_CELL_DEVELOPMENT	462	0.0902421	2.2607	0.00204499	0.0359731	0.815	2826	tags=29%, list=20%, signal=36%
GO_HISTONE_H4_ACETYLATION	63	0.243964	2.25746	0	0.0359426	0.822	7814	tags=81%, list=57%, signal=186%
GO_PEPTIDYL_LYSINE_METHYLATION	104	0.188756	2.24138	0.00203666	0.0393574	0.857	4311	tags=50%, list=31%, signal=72%
GO_MESONEPHROS_DEVELOPMENT	81	0.212486	2.2344	0	0.0408658	0.875	5088	tags=58%, list=37%, signal=91%
GO_REGULATION_OF_HISTONE_METHYLATION	53	0.253198	2.23029	0	0.0412876	0.881	4587	tags=58%, list=33%, signal=87%
GO_PROTEIN_MODIFICATION_BY_SMALL_PROTEIN_REMOVAL	255	0.123012	2.22955	0.00191939	0.0407984	0.885	6933	tags=62%, list=50%, signal=123%
GO_REGULATION_OF_RNA_SPLICING	120	0.170896	2.22945	0.00190114	0.0401758	0.885	3294	tags=41%, list=24%, signal=53%
GO_MITOTIC_SISTER_CHROMATID_COHESION	16	0.468553	2.22662	0	0.0403525	0.891	3026	tags=69%, list=22%, signal=88%
GO_GLOMERULUS_DEVELOPMENT	53	0.253316	2.22593	0	0.0398339	0.892	5366	tags=64%, list=39%, signal=105%
GO_NEGATIVE_REGULATION_OF_RNA_METABOLIC_PROCESS	47	0.270064	2.20861	0	0.043857	0.921	5090	tags=64%, list=37%, signal=101%
GO_ESTABLISHMENT_OR_MAINTENANCE_OF_BIPOLAR_CELL_POLARITY	43	0.282426	2.20493	0	0.0444524	0.926	6700	tags=77%, list=49%, signal=149%
GO_REGULATION_OF_MRNA_SPLICING_VIA_SPLICEOSOME	87	0.199114	2.20344	0.00186567	0.0440778	0.928	3294	tags=44%, list=24%, signal=57%
GO_REGULATION_OF_MRNA_CATABOLIC_PROCESS	179	0.142139	2.20277	0.00205761	0.0435814	0.928	9775	tags=85%, list=71%, signal=288%
GO_PROTEIN_ACYLATION	214	0.126884	2.20088	0	0.0434863	0.929	7814	tags=69%, list=57%, signal=157%
GO_REGULATION_OF_CHROMOSOME_ORGANIZATION	292	0.111835	2.19317	0	0.04542	0.943	7888	tags=68%, list=57%, signal=156%
GO_MRNA_CIS_SPLICING_VIA_SPLICEOSOME	29	0.342192	2.19156	0.00201613	0.0452354	0.945	6703	tags=83%, list=49%, signal=161%
GO_PROTEIN_LOCALIZATION_TO_NUCLEUS	216	0.128724	2.18144	0	0.0474297	0.959	5594	tags=53%, list=41%, signal=88%
GO_REGULATION_OF_HISTONE_MODIFICATION	122	0.167218	2.17383	0	0.0487476	0.967	5174	tags=54%, list=38%, signal=86%
GO_REGULATION_OF_MRNA_3_END_PROCESSING	26	0.362463	2.17196	0.003861	0.0485846	0.968	6679	tags=85%, list=48%, signal=164%
GO_REGULATION_OF_DNA_REPLICATION	92	0.193196	2.17161	0	0.047952	0.968	4098	tags=49%, list=30%, signal=69%
GO_REGULATION_OF_CELLULAR_PROTEIN_LOCALIZATION	470	0.0864287	2.16364	0.00196464	0.0497631	0.972	4100	tags=38%, list=30%, signal=52%
GO_PROTEIN_DNA_COMPLEX_SUBUNIT_ORGANIZATION	190	0.137946	2.16183	0.002	0.0495491	0.973	8212	tags=73%, list=60%, signal=178%
GO_NEGATIVE_REGULATION_OF_CELLULAR_RESPONSE_TO_TRANSFORMING_GROWTH_FACTOR_BETA_STIMULUS	66	0.227783	2.15426	0	0.051418	0.978	4604	tags=56%, list=33%, signal=84%
GO_DNA_DEALKYLATION	21	0.383909	2.15143	0	0.0518207	0.978	5220	tags=76%, list=38%, signal=122%
GO_MYELOID_CELL_APOPTOTIC_PROCESS	23	0.375256	2.1448	0.00590551	0.053384	0.981	3227	tags=61%, list=23%, signal=79%
GO_ESTABLISHMENT_OF_PROTEIN_LOCALIZATION_TO_CHROMOSOME	24	0.366992	2.14392	0.00198807	0.0530886	0.982	3566	tags=63%, list=26%, signal=84%
GO_KIDNEY_MORPHOGENESIS	75	0.209361	2.14121	0.00203252	0.0533898	0.983	5402	tags=60%, list=39%, signal=98%
GO_REGULATION_OF_POSITIVE_CHEMOTAXIS	20	0.399238	2.1267	0	0.0582338	0.991	6913	tags=90%, list=50%, signal=180%
GO_POSITIVE_CHEMOTAXIS	43	0.274041	2.11751	0.00206612	0.0609088	0.992	7136	tags=79%, list=52%, signal=163%
GO_LENS_FIBER_CELL_DIFFERENTIATION	27	0.334528	2.11661	0.004	0.0605091	0.992	3567	tags=59%, list=26%, signal=80%
GO_POSITIVE_REGULATION_OF_CHROMATIN_ORGANIZATION	86	0.192798	2.11591	0	0.0599865	0.992	5054	tags=56%, list=37%, signal=88%
GO_SUBSTRATE_DEPENDENT_CELL_MIGRATION	28	0.336617	2.11556	0.00402414	0.0593467	0.993	7187	tags=86%, list=52%, signal=179%
GO_NUCLEOSOME_ORGANIZATION	95	0.18151	2.11504	0.00198807	0.0588377	0.993	7820	tags=75%, list=57%, signal=171%
GO_MESODERM_DEVELOPMENT	91	0.18676	2.10909	0.010352	0.0603928	0.994	6988	tags=69%, list=51%, signal=139%
GO_UROGENITAL_SYSTEM_DEVELOPMENT	280	0.109835	2.10898	0	0.059695	0.994	5115	tags=48%, list=37%, signal=75%
GO_BETA_CATENIN_TCF_COMPLEX_ASSEMBLY	30	0.322818	2.10468	0.00202429	0.0609789	0.994	8888	tags=97%, list=64%, signal=271%
GO_REGULATION_OF_PROTEIN_LOCALIZATION_TO_NUCLEUS	100	0.179663	2.09805	0	0.0628687	0.994	4021	tags=47%, list=29%, signal=66%
GO_TUBE_CLOSURE	83	0.194188	2.09271	0.00196078	0.0641827	0.994	6808	tags=69%, list=49%, signal=135%
GO_REGULATION_OF_CELLULAR_AMINO_ACID_METABOLIC_PROCESS	54	0.24267	2.08955	0.00392157	0.0647983	0.995	6881	tags=74%, list=50%, signal=147%
GO_DEMETHYLATION	48	0.255248	2.08911	0	0.0642677	0.995	7409	tags=79%, list=54%, signal=170%
GO_POSITIVE_REGULATION_OF_CHROMOSOME_ORGANIZATION	153	0.144868	2.08741	0.00400802	0.0643002	0.996	5054	tags=51%, list=37%, signal=80%
GO_HISTONE_H2A_ACETYLATION	15	0.442654	2.07835	0.00621118	0.0674982	0.997	7692	tags=100%, list=56%, signal=226%
GO_O_GLYCAN_PROCESSING	43	0.271157	2.07223	0	0.0693301	0.998	3327	tags=51%, list=24%, signal=67%
GO_DNA_REPAIR	471	0.0828652	2.06788	0.00199601	0.0705839	0.998	8587	tags=70%, list=62%, signal=180%
GO_POSITIVE_REGULATION_OF_DNA_TEMPLATED_TRANSCRIPTION_ELONGATION	29	0.326787	2.0537	0.0039604	0.0764414	0.998	6915	tags=83%, list=50%, signal=166%
GO_DNA_MODIFICATION	84	0.187803	2.03995	0.00612245	0.0822463	0.999	4977	tags=55%, list=36%, signal=85%
GO_MESONEPHRIC_TUBULE_MORPHOGENESIS	51	0.24154	2.03608	0.003861	0.0832764	0.999	5063	tags=61%, list=37%, signal=96%
GO_DNA_REPLICATION	249	0.111851	2.03465	0.00801603	0.0829962	1	7346	tags=64%, list=53%, signal=135%
GO_REGULATION_OF_CHROMATIN_ORGANIZATION	151	0.141332	2.03181	0.00622407	0.0836148	1	7661	tags=70%, list=56%, signal=155%
GO_EMBRYONIC_PATTERN_SPECIFICATION	47	0.255167	2.02887	0.00386847	0.0842779	1	8229	tags=85%, list=60%, signal=210%
GO_REGULATION_OF_HISTONE_H3_K4_METHYLATION	22	0.35259	2.02099	0.00606061	0.0873094	1	5174	tags=73%, list=38%, signal=116%
GO_NEGATIVE_REGULATION_OF_MRNA_PROCESSING	29	0.30938	2.01353	0.00397614	0.0905811	1	6679	tags=79%, list=48%, signal=153%
GO_NEPHRON_MORPHOGENESIS	60	0.217082	2.00936	0.00404858	0.0917653	1	5063	tags=58%, list=37%, signal=92%
GO_REGULATION_OF_DNA_METABOLIC_PROCESS	234	0.113836	2.00568	0.00201207	0.0931333	1	4644	tags=45%, list=34%, signal=67%
GO_TRANSCRIPTION_PREINITIATION_COMPLEX_ASSEMBLY	40	0.272128	2.00403	0.0020202	0.0930405	1	6945	tags=78%, list=50%, signal=156%
GO_POSITIVE_REGULATION_OF_PROTEIN_IMPORT	36	0.291318	2.00335	0.00409836	0.0926053	1	5569	tags=69%, list=40%, signal=116%
GO_MESENCHYME_DEVELOPMENT	215	0.118996	2.003	0.00209644	0.0918692	1	7941	tags=69%, list=58%, signal=161%
GO_NEGATIVE_REGULATION_OF_RNA_SPLICING	25	0.331783	1.98656	0.00381679	0.100235	1	2603	tags=52%, list=19%, signal=64%
GO_CHROMATIN_ASSEMBLY	81	0.187076	1.98463	0.0060241	0.100405	1	7820	tags=75%, list=57%, signal=173%
GO_MRNA_TRANSCRIPTION	21	0.367507	1.97963	0.00627615	0.102679	1	2819	tags=57%, list=20%, signal=72%
GO_DNA_DEMETHYLATION	15	0.421879	1.97868	0.0060241	0.102359	1	5220	tags=80%, list=38%, signal=129%
GO_NEURAL_TUBE_FORMATION	95	0.170605	1.97218	0.00798403	0.105665	1	6808	tags=66%, list=49%, signal=130%
GO_RENAL_SYSTEM_DEVELOPMENT	251	0.109107	1.97036	0	0.105726	1	5115	tags=48%, list=37%, signal=75%
GO_POSITIVE_REGULATION_OF_CELLULAR_PROTEIN_LOCALIZATION	292	0.0997045	1.9658	0.0141414	0.107858	1	4604	tags=43%, list=33%, signal=63%
GO_POSITIVE_REGULATION_OF_STEM_CELL_PROLIFERATION	35	0.281159	1.96193	0.00782779	0.109379	1	4800	tags=63%, list=35%, signal=96%
GO_POSITIVE_REGULATION_OF_TELOMERASE_RNA_LOCALIZATION_TO_CAJAL_BODY	15	0.419454	1.95871	0.00623701	0.110851	1	4334	tags=73%, list=31%, signal=107%
GO_REGULATION_OF_TRANSMEMBRANE_RECEPTOR_PROTEIN_SERINE_THREONINE_KINASE_SIGNALING_PATHWAY	184	0.122712	1.95741	0.0019685	0.110707	1	4850	tags=47%, list=35%, signal=72%
GO_RRNA_METABOLIC_PROCESS	192	0.12261	1.95567	0.0101626	0.110756	1	6951	tags=63%, list=50%, signal=124%
GO_CELL_AGING	93	0.168857	1.95305	0.00623701	0.111373	1	2283	tags=33%, list=17%, signal=40%
GO_NEGATIVE_REGULATION_OF_NUCLEOBASE_CONTAINING_COMPOUND_METABOLIC_PROCESS	123	0.149054	1.95209	0.00414938	0.111176	1	6483	tags=62%, list=47%, signal=116%
GO_CHROMATIN_ASSEMBLY_OR_DISASSEMBLY	104	0.164904	1.94975	0.00585938	0.111779	1	7820	tags=73%, list=57%, signal=168%
GO_TRANSMEMBRANE_RECEPTOR_PROTEIN_SERINE_THREONINE_KINASE_SIGNALING_PATHWAY	272	0.100619	1.94304	0.00954198	0.115477	1	4723	tags=44%, list=34%, signal=66%
GO_REGULATION_OF_MORPHOGENESIS_OF_AN_EPITHELIUM	157	0.133512	1.94226	0.00614754	0.115106	1	5733	tags=55%, list=42%, signal=93%
GO_PROTEIN_LOCALIZATION_TO_CHROMOSOME	76	0.192123	1.93961	0.00592885	0.115894	1	4441	tags=51%, list=32%, signal=75%
GO_REGULATION_OF_CELLULAR_RESPONSE_TO_TRANSFORMING_GROWTH_FACTOR_BETA_STIMULUS	100	0.164797	1.93861	0.00193798	0.115624	1	5052	tags=53%, list=37%, signal=83%
GO_NEGATIVE_REGULATION_OF_MRNA_SPLICING_VIA_SPLICEOSOME	20	0.361706	1.93473	0.0117188	0.117398	1	2603	tags=55%, list=19%, signal=68%
GO_TOXIN_TRANSPORT	35	0.277377	1.933	0.00402414	0.117516	1	4458	tags=60%, list=32%, signal=88%
GO_MORPHOGENESIS_OF_A_POLARIZED_EPITHELIUM	132	0.142292	1.93034	0.01222	0.118253	1	6936	tags=64%, list=50%, signal=128%
GO_SKELETAL_SYSTEM_DEVELOPMENT	385	0.0850458	1.92458	0.0116959	0.121297	1	1832	tags=22%, list=13%, signal=24%
GO_EPITHELIAL_TUBE_MORPHOGENESIS	259	0.104333	1.9206	0.00610998	0.123247	1	6308	tags=56%, list=46%, signal=101%
GO_POSITIVE_REGULATION_OF_VASCULAR_SMOOTH_MUSCLE_CELL_PROLIFERATION	31	0.287859	1.91961	0.00576923	0.123035	1	3156	tags=52%, list=23%, signal=67%
GO_RESPONSE_TO_BMP	123	0.149066	1.91939	0.00573614	0.122289	1	4801	tags=50%, list=35%, signal=75%
GO_REGULATION_OF_ANIMAL_ORGAN_MORPHOGENESIS	211	0.114284	1.91897	0.0101626	0.121618	1	5702	tags=53%, list=41%, signal=88%
GO_CELLULAR_SENESCENCE	58	0.212939	1.91577	0.012474	0.123011	1	2068	tags=36%, list=15%, signal=42%
GO_DNA_RECOMBINATION	217	0.113547	1.9131	0.0127971	0.12397	1	7800	tags=68%, list=57%, signal=153%
GO_NEGATIVE_REGULATION_OF_INTRACELLULAR_STEROID_HORMONE_RECEPTOR_SIGNALING_PATHWAY	29	0.297641	1.91288	0.0136719	0.123185	1	6365	tags=76%, list=46%, signal=141%
GO_REGULATION_OF_CELL_MORPHOGENESIS_INVOLVED_IN_DIFFERENTIATION	280	0.0991864	1.91207	0.0120482	0.122862	1	7032	tags=61%, list=51%, signal=121%
GO_CELLULAR_RESPONSE_TO_CALCIUM_ION	75	0.18401	1.91	0.00770713	0.123352	1	2256	tags=35%, list=16%, signal=41%
GO_NEGATIVE_REGULATION_OF_CELLULAR_RESPONSE_TO_GROWTH_FACTOR_STIMULUS	124	0.145509	1.90776	0.00607287	0.123888	1	6018	tags=58%, list=44%, signal=102%
GO_POSITIVE_REGULATION_OF_CELL_CELL_ADHESION	182	0.124777	1.90726	0.00409836	0.123393	1	7015	tags=63%, list=51%, signal=127%
GO_ANATOMICAL_STRUCTURE_MATURATION	128	0.145935	1.90572	0.01222	0.12351	1	2638	tags=34%, list=19%, signal=41%
GO_DNA_CONFORMATION_CHANGE	203	0.113104	1.90361	0.00414938	0.124028	1	4984	tags=47%, list=36%, signal=73%
GO_FOREBRAIN_DEVELOPMENT	326	0.0916696	1.90208	0.00972763	0.124141	1	2572	tags=28%, list=19%, signal=33%
GO_MORPHOGENESIS_OF_EMBRYONIC_EPITHELIUM	127	0.145407	1.89985	0.016129	0.124941	1	6808	tags=64%, list=49%, signal=125%
GO_REGULATION_OF_INTRACELLULAR_PROTEIN_TRANSPORT	217	0.110142	1.89905	0.00972763	0.124679	1	5177	tags=48%, list=38%, signal=76%
GO_CELL_PROLIFERATION_IN_FOREBRAIN	22	0.345387	1.89804	0.00397614	0.124576	1	1512	tags=45%, list=11%, signal=51%
GO_NEGATIVE_REGULATION_OF_CELLULAR_AMIDE_METABOLIC_PROCESS	134	0.142976	1.8932	0.011811	0.12736	1	8544	tags=76%, list=62%, signal=198%
GO_NEPHRON_EPITHELIUM_DEVELOPMENT	87	0.174132	1.89086	0.0118812	0.128214	1	5063	tags=54%, list=37%, signal=85%
GO_MORPHOGENESIS_OF_A_BRANCHING_STRUCTURE	158	0.129439	1.8902	0.00826446	0.127785	1	5479	tags=53%, list=40%, signal=86%
GO_NEGATIVE_REGULATION_OF_TRANSMEMBRANE_RECEPTOR_PROTEIN_SERINE_THREONINE_KINASE_SIGNALING_PATHWAY	95	0.164142	1.89001	0.00819672	0.127054	1	4719	tags=51%, list=34%, signal=76%
GO_NEGATIVE_REGULATION_OF_FAT_CELL_DIFFERENTIATION	37	0.259353	1.88609	0.011976	0.129009	1	3141	tags=49%, list=23%, signal=63%
GO_POSITIVE_REGULATION_OF_PROTEIN_LOCALIZATION_TO_NUCLEUS	67	0.196365	1.88153	0.016	0.131587	1	3685	tags=46%, list=27%, signal=63%
GO_ESTABLISHMENT_OF_ENDOTHELIAL_BARRIER	36	0.263492	1.88146	0.023301	0.130805	1	7101	tags=78%, list=51%, signal=160%
GO_BONE_DEVELOPMENT	171	0.124094	1.88107	0.0169173	0.130227	1	2180	tags=28%, list=16%, signal=33%
GO_MALE_SEX_DIFFERENTIATION	121	0.145892	1.88012	0.0132576	0.129994	1	5641	tags=55%, list=41%, signal=93%
GO_NON_RECOMBINATIONAL_REPAIR	67	0.194802	1.87666	0.0172414	0.13137	1	8029	tags=78%, list=58%, signal=185%
GO_INTRACELLULAR_STEROID_HORMONE_RECEPTOR_SIGNALING_PATHWAY	111	0.154609	1.8763	0.00990099	0.13079	1	6084	tags=59%, list=44%, signal=106%
GO_REGULATION_OF_BMP_SIGNALING_PATHWAY	69	0.188979	1.87576	0.0154739	0.130294	1	4801	tags=54%, list=35%, signal=82%
GO_DNA_PACKAGING	113	0.151919	1.87497	0.0140845	0.130181	1	3291	tags=39%, list=24%, signal=51%
GO_REGULATION_OF_ESTABLISHMENT_OF_PLANAR_POLARITY	104	0.156002	1.87264	0.00601202	0.131238	1	6881	tags=65%, list=50%, signal=130%
GO_PROTEIN_MONOUBIQUITINATION	63	0.202856	1.8648	0.0151515	0.136457	1	6846	tags=70%, list=50%, signal=138%
GO_REGULATION_OF_STEM_CELL_PROLIFERATION	53	0.218753	1.85781	0.0172084	0.14094	1	4800	tags=57%, list=35%, signal=86%
GO_IMPORT_INTO_NUCLEUS	132	0.140262	1.85752	0.014862	0.140297	1	5710	tags=55%, list=41%, signal=93%
GO_SPLICEOSOMAL_SNRNP_ASSEMBLY	37	0.262269	1.8481	0.0119522	0.146997	1	5710	tags=68%, list=41%, signal=115%
GO_PATHWAY_RESTRICTED_SMAD_PROTEIN_PHOSPHORYLATION	48	0.227584	1.84638	0.0126582	0.147526	1	5778	tags=65%, list=42%, signal=111%
GO_MRNA_TRANSCRIPTION_BY_RNA_POLYMERASE_II	16	0.372877	1.84627	0.00616016	0.146714	1	3482	tags=63%, list=25%, signal=84%
GO_DNA_TEMPLATED_TRANSCRIPTION_INITIATION	206	0.109772	1.84513	0.0119048	0.14681	1	8215	tags=70%, list=60%, signal=171%
GO_NEURAL_TUBE_DEVELOPMENT	140	0.13344	1.84231	0.01875	0.148443	1	6255	tags=59%, list=45%, signal=106%
GO_HISTONE_MRNA_METABOLIC_PROCESS	22	0.320833	1.84171	0.0125	0.147994	1	6865	tags=82%, list=50%, signal=163%
GO_CALCIUM_ION_IMPORT	59	0.20149	1.84023	0.028169	0.148219	1	4712	tags=54%, list=34%, signal=82%
GO_NEGATIVE_REGULATION_OF_TELOMERE_MAINTENANCE_VIA_TELOMERASE	17	0.374606	1.8393	0.0124481	0.148109	1	4574	tags=71%, list=33%, signal=105%
GO_POSITIVE_REGULATION_OF_NERVOUS_SYSTEM_DEVELOPMENT	470	0.0741335	1.83742	0.00208333	0.148739	1	2826	tags=28%, list=20%, signal=34%
GO_CELLULAR_RESPONSE_TO_UV	71	0.179648	1.83114	0.00811359	0.152922	1	6275	tags=63%, list=46%, signal=116%
GO_SISTER_CHROMATID_SEGREGATION	158	0.124176	1.83075	0.014	0.152357	1	9304	tags=80%, list=67%, signal=242%
GO_NEGATIVE_REGULATION_OF_CHROMOSOME_ORGANIZATION	118	0.142723	1.83029	0.0189753	0.151866	1	7748	tags=70%, list=56%, signal=159%
GO_REGULATION_OF_CHROMOSOME_SEGREGATION	90	0.162353	1.82676	0.0137525	0.15413	1	7888	tags=73%, list=57%, signal=170%
GO_DNA_METHYLATION_OR_DEMETHYLATION	64	0.191627	1.82619	0.0143443	0.15382	1	4695	tags=53%, list=34%, signal=80%
GO_FIBROBLAST_GROWTH_FACTOR_RECEPTOR_SIGNALING_PATHWAY	90	0.160825	1.82573	0.020202	0.153292	1	2699	tags=36%, list=20%, signal=44%
GO_EMBRYONIC_SKELETAL_SYSTEM_MORPHOGENESIS	57	0.203693	1.82265	0.00607287	0.154811	1	3976	tags=49%, list=29%, signal=69%
GO_TELOMERE_ORGANIZATION	140	0.130782	1.82003	0.010352	0.156084	1	2351	tags=30%, list=17%, signal=36%
GO_POSITIVE_REGULATION_OF_SMALL_GTPASE_MEDIATED_SIGNAL_TRANSDUCTION	59	0.203328	1.81821	0.0174081	0.156662	1	5388	tags=59%, list=39%, signal=97%
GO_FC_EPSILON_RECEPTOR_SIGNALING_PATHWAY	103	0.153035	1.81212	0.0162272	0.161002	1	10758	tags=93%, list=78%, signal=421%
GO_REGULATION_OF_INTRACELLULAR_STEROID_HORMONE_RECEPTOR_SIGNALING_PATHWAY	65	0.18915	1.81041	0.0123457	0.16166	1	6526	tags=66%, list=47%, signal=125%
GO_POSITIVE_REGULATION_OF_PHOSPHATASE_ACTIVITY	27	0.290411	1.81004	0.024948	0.161071	1	4685	tags=63%, list=34%, signal=95%
GO_ESTABLISHMENT_OF_PROTEIN_LOCALIZATION_TO_TELOMERE	18	0.359532	1.80888	0.0179283	0.161137	1	3475	tags=61%, list=25%, signal=82%
GO_PEPTIDYL_ARGININE_MODIFICATION	19	0.340095	1.80719	0.0148305	0.161736	1	5477	tags=74%, list=40%, signal=122%
GO_PATTERN_SPECIFICATION_PROCESS	309	0.0887454	1.80457	0.010101	0.163024	1	4069	tags=38%, list=30%, signal=53%
GO_REGULATION_OF_PROTEIN_AUTOPHOSPHORYLATION	44	0.230176	1.8027	0.0116959	0.163902	1	4984	tags=59%, list=36%, signal=92%
GO_N_TERMINAL_PROTEIN_AMINO_ACID_ACETYLATION	15	0.38072	1.80256	0.0163934	0.163182	1	5787	tags=80%, list=42%, signal=138%
GO_CHROMOSOME_SEGREGATION	257	0.0990671	1.80223	0.01417	0.162543	1	7888	tags=67%, list=57%, signal=153%
GO_METHYLATION	291	0.0933486	1.80215	0.0165631	0.161731	1	6748	tags=58%, list=49%, signal=111%
GO_EMBRYONIC_SKELETAL_SYSTEM_DEVELOPMENT	79	0.168284	1.79327	0.0196078	0.169057	1	3976	tags=46%, list=29%, signal=64%
GO_BLOOD_VESSEL_ENDOTHELIAL_CELL_MIGRATION	104	0.147383	1.79067	0.0222672	0.170428	1	3286	tags=38%, list=24%, signal=50%
GO_NEURONAL_STEM_CELL_POPULATION_MAINTENANCE	20	0.336991	1.78412	0.00801603	0.175634	1	5012	tags=70%, list=36%, signal=110%
GO_REGULATION_OF_GENE_SILENCING	103	0.148824	1.7806	0.0235294	0.177943	1	7870	tags=72%, list=57%, signal=166%
GO_POSITIVE_REGULATION_OF_LEUKOCYTE_CELL_CELL_ADHESION	158	0.123035	1.78034	0.0178571	0.177243	1	7923	tags=70%, list=57%, signal=162%
GO_POLYSACCHARIDE_METABOLIC_PROCESS	92	0.159858	1.77952	0.00804829	0.177086	1	4105	tags=46%, list=30%, signal=65%
GO_POSITIVE_REGULATION_OF_BONE_MINERALIZATION	32	0.258272	1.77811	0.0196464	0.177354	1	2479	tags=44%, list=18%, signal=53%
GO_PRI_MIRNA_TRANSCRIPTION_BY_RNA_POLYMERASE_II	41	0.230952	1.77558	0.016632	0.178822	1	2878	tags=44%, list=21%, signal=55%
GO_REGULATION_OF_HEMOPOIESIS	354	0.0820243	1.7754	0.0144628	0.178137	1	6104	tags=52%, list=44%, signal=91%
GO_REGULATION_OF_PEPTIDYL_LYSINE_ACETYLATION	54	0.207619	1.77064	0.0243902	0.181856	1	5064	tags=57%, list=37%, signal=90%
GO_RENAL_TUBULE_DEVELOPMENT	76	0.173232	1.77055	0.0213592	0.18102	1	5063	tags=54%, list=37%, signal=85%
GO_POSITIVE_REGULATION_OF_CARDIOCYTE_DIFFERENTIATION	22	0.310424	1.76478	0.0207469	0.185699	1	3874	tags=59%, list=28%, signal=82%
GO_POSITIVE_REGULATION_OF_PHOSPHOPROTEIN_PHOSPHATASE_ACTIVITY	18	0.336831	1.76436	0.0257937	0.185209	1	5320	tags=72%, list=39%, signal=117%
GO_POSITIVE_REGULATION_OF_BIOMINERAL_TISSUE_DEVELOPMENT	36	0.251569	1.76011	0.0313725	0.188363	1	2668	tags=44%, list=19%, signal=55%
GO_TRANSCRIPTION_INITIATION_FROM_RNA_POLYMERASE_II_PROMOTER	164	0.11908	1.75825	0.0263158	0.189405	1	8215	tags=71%, list=60%, signal=174%
GO_SENSORY_SYSTEM_DEVELOPMENT	290	0.0920312	1.75423	0.0194932	0.192508	1	3940	tags=38%, list=29%, signal=52%
GO_RENAL_SYSTEM_VASCULATURE_DEVELOPMENT	22	0.311348	1.75331	0.0271399	0.192554	1	5115	tags=68%, list=37%, signal=108%
GO_RIBOSOMAL_LARGE_SUBUNIT_BIOGENESIS	63	0.185575	1.75019	0.0271845	0.194553	1	5332	tags=57%, list=39%, signal=93%
GO_REGULATION_OF_DNA_BIOSYNTHETIC_PROCESS	94	0.155859	1.74969	0.0178571	0.194135	1	3586	tags=41%, list=26%, signal=56%
GO_REGULATION_OF_SIGNAL_TRANSDUCTION_BY_P53_CLASS_MEDIATOR	165	0.117296	1.74898	0.0175097	0.193822	1	6341	tags=58%, list=46%, signal=105%
GO_RNA_PHOSPHODIESTER_BOND_HYDROLYSIS	125	0.13451	1.74891	0.0222672	0.192969	1	7649	tags=69%, list=55%, signal=153%
GO_LEUKOCYTE_ADHESION_TO_VASCULAR_ENDOTHELIAL_CELL	25	0.295034	1.74773	0.0233051	0.193193	1	7522	tags=84%, list=55%, signal=184%
GO_CIRCADIAN_RHYTHM	166	0.115082	1.74701	0.0236559	0.192932	1	2668	tags=31%, list=19%, signal=38%
GO_RHYTHMIC_PROCESS	235	0.0974909	1.74549	0.0155039	0.193479	1	2668	tags=29%, list=19%, signal=35%
GO_HISTONE_MONOUBIQUITINATION	27	0.281846	1.74251	0.0205339	0.195494	1	6846	tags=78%, list=50%, signal=154%
GO_REGULATION_OF_VASCULAR_SMOOTH_MUSCLE_CELL_PROLIFERATION	47	0.216235	1.73913	0.014	0.197923	1	3189	tags=45%, list=23%, signal=58%
GO_NEGATIVE_REGULATION_OF_GENE_EXPRESSION_EPIGENETIC	80	0.163574	1.73283	0.014	0.203451	1	6548	tags=64%, list=47%, signal=121%
GO_INTRASPECIES_INTERACTION_BETWEEN_ORGANISMS	41	0.226946	1.73017	0.0280561	0.205333	1	5624	tags=63%, list=41%, signal=107%
GO_BONE_MINERALIZATION	89	0.15747	1.72988	0.0264228	0.204749	1	2490	tags=34%, list=18%, signal=41%
GO_AXIS_SPECIFICATION	63	0.181842	1.72538	0.0344168	0.20865	1	8229	tags=78%, list=60%, signal=192%
GO_CELLULAR_RESPONSE_TO_RADIATION	153	0.119756	1.72523	0.0198413	0.207884	1	8371	tags=73%, list=61%, signal=183%
GO_POSITIVE_REGULATION_OF_NEURON_DIFFERENTIATION	320	0.0842653	1.72498	0.0225873	0.207158	1	2484	tags=26%, list=18%, signal=31%
GO_HISTONE_UBIQUITINATION	43	0.228402	1.72481	0.0237154	0.206382	1	7122	tags=74%, list=52%, signal=153%
GO_NEGATIVE_REGULATION_OF_HISTONE_MODIFICATION	35	0.240028	1.71732	0.0243902	0.213441	1	8124	tags=83%, list=59%, signal=201%
GO_POSITIVE_REGULATION_OF_PRI_MIRNA_TRANSCRIPTION_BY_RNA_POLYMERASE_II	27	0.278642	1.71663	0.0292398	0.213387	1	4847	tags=63%, list=35%, signal=97%
GO_ESTABLISHMENT_OR_MAINTENANCE_OF_MONOPOLAR_CELL_POLARITY	20	0.317504	1.71566	0.0240481	0.213522	1	7349	tags=85%, list=53%, signal=182%
GO_MRNA_CLEAVAGE	22	0.304653	1.71394	0.035124	0.214437	1	1446	tags=41%, list=10%, signal=46%
GO_REGULATION_OF_GENE_EXPRESSION_BY_GENETIC_IMPRINTING	15	0.372779	1.71286	0.0379242	0.214753	1	4977	tags=73%, list=36%, signal=115%
GO_NON_CANONICAL_WNT_SIGNALING_PATHWAY	138	0.125422	1.71022	0.0318091	0.216534	1	6881	tags=62%, list=50%, signal=123%
GO_NEURON_MIGRATION	131	0.126308	1.70508	0.0327198	0.22132	1	3011	tags=34%, list=22%, signal=44%
GO_BRANCHING_MORPHOGENESIS_OF_AN_EPITHELIAL_TUBE	119	0.133201	1.7042	0.0207039	0.221405	1	5479	tags=53%, list=40%, signal=87%
GO_NCRNA_EXPORT_FROM_NUCLEUS	36	0.242051	1.70337	0.0256959	0.221346	1	7779	tags=81%, list=56%, signal=184%
GO_SPLICEOSOMAL_COMPLEX_ASSEMBLY	52	0.203853	1.7001	0.0321199	0.224142	1	9398	tags=88%, list=68%, signal=277%
GO_GENE_SILENCING_BY_RNA	139	0.123389	1.68856	0.0181452	0.236231	1	7740	tags=68%, list=56%, signal=154%
GO_TELOMERE_MAINTENANCE_VIA_SEMI_CONSERVATIVE_REPLICATION	28	0.265126	1.68683	0.026	0.237197	1	9156	tags=93%, list=66%, signal=276%
GO_LABYRINTHINE_LAYER_MORPHOGENESIS	16	0.351888	1.6865	0.029661	0.236626	1	5495	tags=75%, list=40%, signal=125%
GO_RESPONSE_TO_TYPE_I_INTERFERON	66	0.176668	1.6855	0.0223124	0.236853	1	7813	tags=74%, list=57%, signal=170%
GO_SMAD_PROTEIN_SIGNAL_TRANSDUCTION	49	0.204757	1.68334	0.0295276	0.238287	1	3940	tags=49%, list=29%, signal=68%
GO_REGULATION_OF_PROTEIN_ACETYLATION	64	0.180444	1.6824	0.0417495	0.238554	1	5064	tags=55%, list=37%, signal=86%
GO_ASYMMETRIC_CELL_DIVISION	17	0.338942	1.68131	0.0323232	0.238962	1	4254	tags=65%, list=31%, signal=93%
GO_LAMELLIPODIUM_ASSEMBLY	62	0.177278	1.68128	0.0229645	0.238019	1	6685	tags=66%, list=48%, signal=128%
GO_PLATELET_MORPHOGENESIS	18	0.329231	1.67895	0.0237624	0.239709	1	6957	tags=83%, list=50%, signal=168%
GO_SPINDLE_ASSEMBLY	94	0.145532	1.67777	0.0426357	0.240225	1	5488	tags=54%, list=40%, signal=90%
GO_REGULATION_OF_CHROMATIN_SILENCING	22	0.298328	1.67545	0.0354331	0.242125	1	6548	tags=77%, list=47%, signal=147%
GO_REGULATION_OF_METANEPHROS_DEVELOPMENT	15	0.360017	1.67437	0.0424242	0.242533	1	7911	tags=93%, list=57%, signal=219%
GO_PURINE_NUCLEOSIDE_METABOLIC_PROCESS	32	0.245617	1.67428	0.028866	0.241668	1	4377	tags=56%, list=32%, signal=82%
GO_REGULATION_OF_CALCIUM_ION_IMPORT	22	0.29509	1.673	0.0261569	0.242355	1	4712	tags=64%, list=34%, signal=97%
GO_GAMETE_GENERATION	455	0.0678475	1.67152	0.0419162	0.243013	1	9248	tags=74%, list=67%, signal=216%
GO_REGULATION_OF_ANDROGEN_RECEPTOR_SIGNALING_PATHWAY	23	0.288767	1.67127	0.0276134	0.242341	1	5617	tags=70%, list=41%, signal=117%
GO_LOCALIZATION_WITHIN_MEMBRANE	139	0.119172	1.66955	0.0423892	0.24343	1	7996	tags=70%, list=58%, signal=164%
GO_TRANSFORMING_GROWTH_FACTOR_BETA_RECEPTOR_SIGNALING_PATHWAY	164	0.110172	1.66218	0.0328542	0.251741	1	5225	tags=49%, list=38%, signal=78%
GO_POSITIVE_REGULATION_OF_HISTONE_H3_K4_METHYLATION	15	0.347387	1.66203	0.0264228	0.250894	1	8085	tags=93%, list=59%, signal=225%
GO_RESPONSE_TO_TRANSFORMING_GROWTH_FACTOR_BETA	212	0.0994005	1.66143	0.0380762	0.250513	1	5870	tags=52%, list=43%, signal=90%
GO_PROTEIN_REFOLDING	31	0.255842	1.66093	0.0268714	0.25011	1	8935	tags=90%, list=65%, signal=256%
GO_ANDROGEN_RECEPTOR_SIGNALING_PATHWAY	52	0.198343	1.66044	0.031746	0.249677	1	7352	tags=73%, list=53%, signal=156%
GO_NUCLEOSIDE_DIPHOSPHATE_METABOLIC_PROCESS	25	0.28306	1.66002	0.0293542	0.249271	1	4377	tags=60%, list=32%, signal=88%
GO_POSITIVE_REGULATION_OF_CELL_MORPHOGENESIS_INVOLVED_IN_DIFFERENTIATION	140	0.119817	1.656	0.0227743	0.253108	1	7032	tags=63%, list=51%, signal=127%
GO_MITOTIC_SPINDLE_ASSEMBLY	50	0.198185	1.65538	0.024	0.252856	1	9136	tags=86%, list=66%, signal=254%
GO_POSITIVE_REGULATION_OF_AMINE_TRANSPORT	28	0.257271	1.65429	0.0376984	0.25316	1	891	tags=32%, list=6%, signal=34%
GO_REGULATION_OF_CELL_MORPHOGENESIS	438	0.0692471	1.65194	0.0386179	0.255141	1	6757	tags=56%, list=49%, signal=106%
GO_EPHRIN_RECEPTOR_SIGNALING_PATHWAY	83	0.154455	1.65188	0.032	0.254229	1	4528	tags=48%, list=33%, signal=71%
GO_LAMELLIPODIUM_ORGANIZATION	78	0.160763	1.6492	0.0389344	0.256565	1	5574	tags=56%, list=40%, signal=94%
GO_HISTONE_H3_K9_MODIFICATION	42	0.212696	1.64788	0.0300601	0.25724	1	2000	tags=36%, list=15%, signal=42%
GO_CELL_DIFFERENTIATION_INVOLVED_IN_KIDNEY_DEVELOPMENT	43	0.215742	1.64769	0.0350515	0.256528	1	5051	tags=58%, list=37%, signal=91%
GO_REGULATION_OF_AXON_GUIDANCE	41	0.217935	1.64767	0.0320641	0.255603	1	6757	tags=71%, list=49%, signal=138%
GO_POSITIVE_REGULATION_OF_DEPHOSPHORYLATION	48	0.202585	1.64738	0.0335968	0.255043	1	4685	tags=54%, list=34%, signal=82%
GO_EMBRYONIC_EYE_MORPHOGENESIS	30	0.250898	1.64365	0.0241187	0.258783	1	9418	tags=93%, list=68%, signal=294%
GO_GENETIC_IMPRINTING	21	0.306692	1.64364	0.0407332	0.257829	1	2343	tags=48%, list=17%, signal=57%
GO_ENTEROENDOCRINE_CELL_DIFFERENTIATION	22	0.278699	1.64234	0.0280561	0.25836	1	8072	tags=86%, list=59%, signal=208%
GO_POSITIVE_REGULATION_OF_PEPTIDYL_THREONINE_PHOSPHORYLATION	26	0.264763	1.6409	0.0304878	0.259315	1	6963	tags=77%, list=50%, signal=155%
GO_DNA_DOUBLE_STRAND_BREAK_PROCESSING	24	0.280635	1.63851	0.0372549	0.261202	1	7628	tags=83%, list=55%, signal=186%
GO_POLYSACCHARIDE_BIOSYNTHETIC_PROCESS	69	0.166873	1.63596	0.0280561	0.263514	1	4105	tags=46%, list=30%, signal=66%
GO_REGULATION_OF_DNA_BINDING	101	0.140337	1.63512	0.0412758	0.263485	1	6407	tags=60%, list=46%, signal=112%
GO_REGULATION_OF_CELL_CELL_ADHESION	289	0.0823848	1.6346	0.0325866	0.263126	1	5806	tags=50%, list=42%, signal=85%
GO_NEGATIVE_REGULATION_OF_NEURON_DEATH	174	0.106216	1.63439	0.0404624	0.262401	1	1723	tags=23%, list=12%, signal=26%
GO_REGULATION_OF_INTRINSIC_APOPTOTIC_SIGNALING_PATHWAY_IN_RESPONSE_TO_DNA_DAMAGE_BY_P53_CLASS_MEDIATOR	17	0.327164	1.63423	0.0397614	0.261717	1	3605	tags=59%, list=26%, signal=80%
GO_CELLULAR_RESPONSE_TO_ALKALOID	32	0.24039	1.63411	0.0324544	0.260902	1	3156	tags=47%, list=23%, signal=61%
GO_NEGATIVE_REGULATION_OF_NERVOUS_SYSTEM_DEVELOPMENT	268	0.0861214	1.63371	0.0383877	0.260447	1	1819	tags=22%, list=13%, signal=24%
GO_NEGATIVE_REGULATION_OF_CHROMATIN_ORGANIZATION	44	0.206963	1.63228	0.0361446	0.261351	1	8124	tags=80%, list=59%, signal=193%
GO_EPITHELIAL_CELL_DIFFERENTIATION	434	0.0688543	1.63014	0.0358566	0.263028	1	4100	tags=36%, list=30%, signal=50%
GO_RRNA_CATABOLIC_PROCESS	15	0.348011	1.62973	0.0290698	0.262623	1	7157	tags=87%, list=52%, signal=180%
GO_PROTEIN_IMPORT	160	0.112631	1.62934	0.036965	0.262181	1	5704	tags=52%, list=41%, signal=88%
GO_TELENCEPHALON_DEVELOPMENT	223	0.0929591	1.62921	0.0207469	0.261458	1	2572	tags=28%, list=19%, signal=34%
GO_STEM_CELL_DIFFERENTIATION	207	0.10052	1.62906	0.0482897	0.260717	1	4563	tags=43%, list=33%, signal=63%
GO_HEART_VALVE_DEVELOPMENT	49	0.193667	1.6283	0.0484211	0.260633	1	6344	tags=65%, list=46%, signal=121%
GO_REGULATION_OF_ALCOHOL_BIOSYNTHETIC_PROCESS	64	0.175413	1.62819	0.0384615	0.259889	1	5995	tags=61%, list=43%, signal=107%
GO_REGULATION_OF_CHEMOTAXIS	159	0.112313	1.62514	0.0356347	0.26291	1	7315	tags=64%, list=53%, signal=135%
GO_NUCLEAR_CHROMOSOME_SEGREGATION	209	0.096422	1.6251	0.0342052	0.262045	1	9709	tags=80%, list=70%, signal=266%
GO_REGULATION_OF_BINDING	311	0.0796996	1.6227	0.0407332	0.264138	1	4512	tags=41%, list=33%, signal=59%
GO_POSITIVE_REGULATION_OF_PATHWAY_RESTRICTED_SMAD_PROTEIN_PHOSPHORYLATION	34	0.24063	1.62219	0.0337302	0.263834	1	4801	tags=59%, list=35%, signal=90%
GO_POSITIVE_REGULATION_OF_KIDNEY_DEVELOPMENT	29	0.259114	1.62204	0.0357853	0.263088	1	4993	tags=62%, list=36%, signal=97%
GO_NEGATIVE_REGULATION_OF_PHAGOCYTOSIS	17	0.324584	1.62173	0.0392927	0.262592	1	5263	tags=71%, list=38%, signal=114%
GO_MESENCHYMAL_CELL_DIFFERENTIATION	178	0.106721	1.62143	0.0446602	0.262092	1	6139	tags=55%, list=45%, signal=98%
GO_PROTEIN_FOLDING	192	0.102207	1.62108	0.044898	0.261569	1	9096	tags=76%, list=66%, signal=220%
GO_STEM_CELL_PROLIFERATION	103	0.132659	1.62087	0.0378947	0.260938	1	3405	tags=38%, list=25%, signal=50%
GO_TRNA_TRANSPORT	32	0.241531	1.61959	0.0382294	0.261669	1	7450	tags=78%, list=54%, signal=170%
GO_ACTIVIN_RECEPTOR_SIGNALING_PATHWAY	30	0.244677	1.61659	0.0368932	0.264428	1	5826	tags=67%, list=42%, signal=115%
GO_NEUROPEPTIDE_SIGNALING_PATHWAY	64	0.169974	1.61644	0.046875	0.263733	1	1329	tags=27%, list=10%, signal=29%
GO_EPITHELIAL_TO_MESENCHYMAL_TRANSITION	113	0.133917	1.61552	0.0422535	0.264081	1	8419	tags=74%, list=61%, signal=189%
GO_POST_EMBRYONIC_DEVELOPMENT	80	0.154365	1.61349	0.0461538	0.265696	1	4778	tags=50%, list=35%, signal=76%
GO_POSITIVE_REGULATION_OF_LAMELLIPODIUM_ASSEMBLY	19	0.305085	1.6112	0.0400802	0.267587	1	6685	tags=79%, list=48%, signal=153%
GO_MOLTING_CYCLE	81	0.151203	1.61096	0.0441767	0.267011	1	2523	tags=33%, list=18%, signal=41%
GO_CENTRAL_NERVOUS_SYSTEM_PROJECTION_NEURON_AXONOGENESIS	25	0.267816	1.60558	0.0481928	0.272797	1	1277	tags=36%, list=9%, signal=40%
GO_POSITIVE_REGULATION_OF_CELL_ADHESION	311	0.0790031	1.60456	0.0378788	0.273191	1	7049	tags=59%, list=51%, signal=118%
GO_PEPTIDYL_THREONINE_MODIFICATION	110	0.134901	1.60412	0.0587045	0.272879	1	7431	tags=67%, list=54%, signal=145%
GO_REGULATION_OF_SISTER_CHROMATID_SEGREGATION	71	0.161184	1.60322	0.0404858	0.27322	1	7888	tags=73%, list=57%, signal=170%
GO_AMYLOID_PRECURSOR_PROTEIN_CATABOLIC_PROCESS	37	0.219808	1.60204	0.0502901	0.273891	1	6294	tags=68%, list=46%, signal=124%
GO_NEGATIVE_REGULATION_OF_DNA_REPLICATION	34	0.232763	1.60022	0.0493827	0.275455	1	4098	tags=53%, list=30%, signal=75%
GO_BIOMINERAL_TISSUE_DEVELOPMENT	115	0.124763	1.59948	0.0399202	0.275547	1	2490	tags=30%, list=18%, signal=37%
GO_SKELETAL_SYSTEM_MORPHOGENESIS	171	0.104735	1.59944	0.0378486	0.274726	1	3976	tags=39%, list=29%, signal=54%
GO_TUBE_FORMATION	125	0.123391	1.59832	0.045082	0.275352	1	6808	tags=62%, list=49%, signal=121%
GO_ACTIVATION_OF_INNATE_IMMUNE_RESPONSE	243	0.09039	1.59696	0.0423077	0.276171	1	9898	tags=81%, list=72%, signal=281%
GO_POSITIVE_REGULATION_OF_SMOOTHENED_SIGNALING_PATHWAY	29	0.250299	1.59676	0.0368932	0.275496	1	2261	tags=41%, list=16%, signal=49%
GO_NEGATIVE_REGULATION_OF_TELOMERE_MAINTENANCE_VIA_TELOMERE_LENGTHENING	23	0.27742	1.59557	0.0437376	0.276178	1	4574	tags=61%, list=33%, signal=91%
GO_CHROMOSOME_CONDENSATION	26	0.261787	1.59121	0.0408998	0.281092	1	3291	tags=50%, list=24%, signal=66%
GO_NEGATIVE_REGULATION_OF_SIGNALING_RECEPTOR_ACTIVITY	32	0.234867	1.58566	0.0358566	0.287629	1	3232	tags=47%, list=23%, signal=61%
GO_REGULATION_OF_PROTEIN_STABILITY	246	0.0891653	1.58517	0.0456522	0.287441	1	5911	tags=52%, list=43%, signal=89%
GO_REGULATION_OF_CELL_AGING	41	0.210799	1.58406	0.0497132	0.287921	1	2146	tags=37%, list=16%, signal=43%
GO_REGULATION_OF_HEMATOPOIETIC_PROGENITOR_CELL_DIFFERENTIATION	77	0.150347	1.58359	0.0492813	0.28766	1	9758	tags=86%, list=71%, signal=291%
GO_NUCLEAR_TRANSCRIBED_MRNA_CATABOLIC_PROCESS_DEADENYLATION_DEPENDENT_DECAY	66	0.166041	1.58325	0.0375783	0.287207	1	7332	tags=70%, list=53%, signal=148%
GO_PEPTIDYL_ASPARAGINE_MODIFICATION	32	0.236068	1.5826	0.0609037	0.287069	1	9680	tags=94%, list=70%, signal=314%
GO_RRNA_METHYLATION	21	0.281948	1.58041	0.0497018	0.289196	1	2027	tags=43%, list=15%, signal=50%
GO_EPITHELIAL_CELL_DIFFERENTIATION_INVOLVED_IN_KIDNEY_DEVELOPMENT	34	0.222458	1.58033	0.0498008	0.288409	1	5051	tags=59%, list=37%, signal=93%
GO_DORSAL_VENTRAL_PATTERN_FORMATION	64	0.167932	1.57852	0.0477137	0.290012	1	1788	tags=30%, list=13%, signal=34%
GO_CELLULAR_RESPONSE_TO_LIGHT_STIMULUS	97	0.137298	1.57729	0.0475285	0.290679	1	6365	tags=60%, list=46%, signal=110%
GO_AMINE_TRANSPORT	76	0.155657	1.57727	0.039749	0.289833	1	949	tags=22%, list=7%, signal=24%
GO_ACTIVATION_OF_NF_KAPPAB_INDUCING_KINASE_ACTIVITY	15	0.329051	1.57494	0.0609756	0.292182	1	9257	tags=100%, list=67%, signal=304%
GO_POSITIVE_REGULATION_OF_VIRAL_TRANSCRIPTION	41	0.202061	1.57415	0.0547368	0.292368	1	7648	tags=76%, list=55%, signal=169%
GO_NCRNA_METABOLIC_PROCESS	408	0.0685385	1.57363	0.0494845	0.292266	1	4828	tags=42%, list=35%, signal=62%
GO_RNA_DESTABILIZATION	29	0.242973	1.56972	0.0433884	0.296607	1	8544	tags=86%, list=62%, signal=226%
GO_NEGATIVE_REGULATION_OF_NEURON_APOPTOTIC_PROCESS	130	0.114532	1.56634	0.0386266	0.300457	1	1723	tags=24%, list=12%, signal=27%
GO_RESPONSE_TO_INTERFERON_BETA	23	0.275298	1.56584	0.0404624	0.300172	1	3404	tags=52%, list=25%, signal=69%
GO_NEGATIVE_REGULATION_OF_DNA_BINDING	44	0.201173	1.5631	0.054902	0.303141	1	6323	tags=66%, list=46%, signal=121%
GO_REGULATION_OF_OSSIFICATION	157	0.107073	1.56276	0.0505051	0.302673	1	2492	tags=29%, list=18%, signal=35%
GO_SOMATIC_DIVERSIFICATION_OF_IMMUNE_RECEPTORS	47	0.194386	1.56188	0.054878	0.302979	1	4663	tags=53%, list=34%, signal=80%
GO_REGULATION_OF_EPITHELIAL_TO_MESENCHYMAL_TRANSITION	73	0.157413	1.56099	0.0585859	0.30327	1	8419	tags=77%, list=61%, signal=196%
GO_DENDRITE_DEVELOPMENT	211	0.0914395	1.56044	0.0502092	0.303079	1	8692	tags=72%, list=63%, signal=192%
GO_POSITIVE_REGULATION_OF_NEUROBLAST_PROLIFERATION	22	0.285242	1.55902	0.0558767	0.304163	1	2967	tags=50%, list=22%, signal=64%
GO_SEGMENTATION	74	0.152694	1.55811	0.0565302	0.304539	1	4800	tags=50%, list=35%, signal=76%
GO_REGULATION_OF_DNA_TEMPLATED_TRANSCRIPTION_IN_RESPONSE_TO_STRESS	113	0.122663	1.55766	0.0429907	0.304273	1	6010	tags=56%, list=44%, signal=98%
GO_MULTI_ORGANISM_BEHAVIOR	53	0.177714	1.55654	0.0344828	0.305061	1	5624	tags=58%, list=41%, signal=98%
GO_REGULATION_OF_CELLULAR_RESPONSE_TO_GROWTH_FACTOR_STIMULUS	226	0.0876498	1.55467	0.0364807	0.306759	1	4241	tags=39%, list=31%, signal=56%
GO_LYMPHOCYTE_COSTIMULATION	40	0.206823	1.55418	0.0376238	0.306569	1	7843	tags=78%, list=57%, signal=179%
GO_DOSAGE_COMPENSATION	16	0.32632	1.55202	0.050813	0.308769	1	8433	tags=94%, list=61%, signal=241%
GO_REGULATION_OF_CHOLESTEROL_BIOSYNTHETIC_PROCESS	41	0.207269	1.55151	0.0470348	0.308535	1	3540	tags=46%, list=26%, signal=62%
GO_POSITIVE_REGULATION_OF_FILOPODIUM_ASSEMBLY	28	0.251204	1.5488	0.0625	0.311544	1	7870	tags=82%, list=57%, signal=191%
GO_MULTI_ORGANISM_LOCALIZATION	65	0.164948	1.54844	0.0566038	0.311172	1	4100	tags=46%, list=30%, signal=65%
GO_ACTIN_CYTOSKELETON_REORGANIZATION	93	0.137355	1.54712	0.0498084	0.312122	1	4494	tags=46%, list=33%, signal=68%
GO_REGULATION_OF_MYELOID_CELL_DIFFERENTIATION	178	0.0977725	1.54702	0.0557851	0.311379	1	5641	tags=51%, list=41%, signal=84%
GO_CATECHOLAMINE_SECRETION	48	0.185967	1.54656	0.0511364	0.31112	1	891	tags=25%, list=6%, signal=27%
GO_AMYLOID_BETA_FORMATION	28	0.238642	1.54378	0.0473373	0.314045	1	2625	tags=43%, list=19%, signal=53%
GO_POSITIVE_REGULATION_OF_PROTEIN_DEPHOSPHORYLATION	39	0.20811	1.54252	0.063786	0.314956	1	4563	tags=54%, list=33%, signal=80%
GO_NEGATIVE_REGULATION_OF_PROTEIN_MATURATION	18	0.296825	1.54225	0.0766208	0.314471	1	5871	tags=72%, list=43%, signal=126%
GO_REGULATION_OF_NUCLEASE_ACTIVITY	18	0.305876	1.54083	0.0711382	0.315795	1	4214	tags=61%, list=31%, signal=88%
GO_POSITIVE_REGULATION_OF_POSTTRANSCRIPTIONAL_GENE_SILENCING	23	0.269589	1.5404	0.0587121	0.315492	1	2883	tags=48%, list=21%, signal=60%
GO_DOPAMINE_SECRETION	29	0.246183	1.53922	0.0564516	0.31624	1	891	tags=31%, list=6%, signal=33%
GO_CAMERA_TYPE_EYE_DEVELOPMENT	246	0.0839073	1.5389	0.0558767	0.315818	1	4861	tags=43%, list=35%, signal=66%
GO_BASE_EXCISION_REPAIR	38	0.211782	1.53879	0.0583804	0.315122	1	7974	tags=79%, list=58%, signal=187%
GO_POSITIVE_REGULATION_OF_NUCLEOBASE_CONTAINING_COMPOUND_METABOLIC_PROCESS	203	0.0932227	1.53819	0.0618763	0.315058	1	3284	tags=33%, list=24%, signal=43%
GO_DNA_DEPENDENT_DNA_REPLICATION	135	0.109826	1.53817	0.0534653	0.314218	1	8204	tags=70%, list=59%, signal=172%
GO_HEMATOPOIETIC_STEM_CELL_DIFFERENTIATION	72	0.154281	1.5381	0.0525292	0.313453	1	9758	tags=86%, list=71%, signal=293%
GO_POSITIVE_REGULATION_OF_DNA_BIOSYNTHETIC_PROCESS	62	0.165877	1.53758	0.0474308	0.31325	1	3505	tags=42%, list=25%, signal=56%
GO_POSITIVE_REGULATION_OF_CARDIAC_MUSCLE_CELL_DIFFERENTIATION	17	0.307634	1.5375	0.056338	0.312501	1	3874	tags=59%, list=28%, signal=82%
GO_POLARIZED_EPITHELIAL_CELL_DIFFERENTIATION	18	0.30077	1.53734	0.046729	0.311871	1	7349	tags=83%, list=53%, signal=178%
GO_NEGATIVE_REGULATION_OF_RESPONSE_TO_DNA_DAMAGE_STIMULUS	67	0.157627	1.53674	0.0560166	0.311857	1	6275	tags=61%, list=46%, signal=112%
GO_POSITIVE_REGULATION_OF_INTRACELLULAR_PROTEIN_TRANSPORT	141	0.107911	1.53546	0.0509804	0.312835	1	5177	tags=48%, list=38%, signal=76%
GO_CELLULAR_RESPONSE_TO_INORGANIC_SUBSTANCE	179	0.101322	1.53408	0.0707269	0.313987	1	2395	tags=27%, list=17%, signal=33%
GO_OSSIFICATION	317	0.0752233	1.5311	0.0529532	0.31751	1	4119	tags=37%, list=30%, signal=52%
GO_EMBRYONIC_MORPHOGENESIS	440	0.0644001	1.52842	0.0638298	0.320477	1	8072	tags=65%, list=59%, signal=151%
GO_POSITIVE_REGULATION_OF_ESTABLISHMENT_OF_PROTEIN_LOCALIZATION	351	0.0702699	1.52808	0.0591716	0.320026	1	4791	tags=42%, list=35%, signal=62%
GO_RRNA_MODIFICATION	30	0.23148	1.52541	0.0610998	0.323015	1	2330	tags=40%, list=17%, signal=48%
GO_REGULATION_OF_LAMELLIPODIUM_ASSEMBLY	31	0.225375	1.52434	0.0684411	0.323787	1	6685	tags=71%, list=48%, signal=137%
GO_REGULATION_OF_LEUKOCYTE_ADHESION_TO_VASCULAR_ENDOTHELIAL_CELL	15	0.321516	1.52379	0.0753564	0.323763	1	7522	tags=87%, list=55%, signal=190%
GO_ERYTHROCYTE_HOMEOSTASIS	99	0.131771	1.52343	0.0666667	0.323467	1	3349	tags=37%, list=24%, signal=49%
GO_PROTEIN_POLYUBIQUITINATION	277	0.0804984	1.52263	0.0578512	0.323702	1	7126	tags=60%, list=52%, signal=121%
GO_REGULATION_OF_NEUROBLAST_PROLIFERATION	28	0.23531	1.52141	0.0440882	0.324676	1	4641	tags=57%, list=34%, signal=86%
GO_REGULATION_OF_MEGAKARYOCYTE_DIFFERENTIATION	47	0.184073	1.52069	0.0601942	0.324942	1	7739	tags=74%, list=56%, signal=169%
GO_POSITIVE_REGULATION_OF_LOCOMOTION	443	0.0639391	1.519	0.0549683	0.326543	1	6150	tags=51%, list=45%, signal=89%
GO_POSITIVE_REGULATION_OF_TRANSMEMBRANE_RECEPTOR_PROTEIN_SERINE_THREONINE_KINASE_SIGNALING_PATHWAY	83	0.143086	1.51841	0.0591716	0.326582	1	4850	tags=49%, list=35%, signal=76%
GO_REGULATION_OF_HAIR_CYCLE	17	0.308937	1.51829	0.0651731	0.325888	1	7101	tags=82%, list=51%, signal=170%
GO_SPINDLE_ORGANIZATION	153	0.106052	1.51756	0.0621242	0.326035	1	4682	tags=44%, list=34%, signal=67%
GO_POSITIVE_REGULATION_OF_MRNA_CATABOLIC_PROCESS	44	0.190898	1.51655	0.0576541	0.326691	1	9912	tags=91%, list=72%, signal=322%
GO_NUCLEOSIDE_MONOPHOSPHATE_METABOLIC_PROCESS	29	0.234764	1.51532	0.062249	0.327637	1	4377	tags=55%, list=32%, signal=81%
GO_HISTONE_DEUBIQUITINATION	22	0.265986	1.51301	0.0669216	0.330144	1	3859	tags=55%, list=28%, signal=76%
GO_NEGATIVE_REGULATION_OF_INTRINSIC_APOPTOTIC_SIGNALING_PATHWAY_BY_P53_CLASS_MEDIATOR	20	0.288944	1.51273	0.0785855	0.329685	1	3605	tags=55%, list=26%, signal=74%
GO_DOPAMINE_TRANSPORT	36	0.213656	1.51168	0.0746562	0.330411	1	891	tags=28%, list=6%, signal=30%
GO_REGULATION_OF_TELOMERE_MAINTENANCE	75	0.154074	1.51094	0.0833333	0.330614	1	3586	tags=41%, list=26%, signal=56%
GO_NEGATIVE_REGULATION_OF_INTRACELLULAR_TRANSPORT	56	0.172391	1.50987	0.0621242	0.331305	1	8467	tags=79%, list=61%, signal=203%
GO_KINETOCHORE_ASSEMBLY	15	0.31597	1.50892	0.0639659	0.331878	1	2082	tags=47%, list=15%, signal=55%
GO_INTRACELLULAR_RECEPTOR_SIGNALING_PATHWAY	238	0.0836908	1.50884	0.0538462	0.331134	1	8136	tags=67%, list=59%, signal=161%
GO_MITOTIC_METAPHASE_PLATE_CONGRESSION	42	0.201334	1.50846	0.0583153	0.330877	1	8395	tags=81%, list=61%, signal=206%
GO_NEGATIVE_REGULATION_OF_JNK_CASCADE	28	0.235655	1.50722	0.0610236	0.331905	1	8084	tags=82%, list=59%, signal=198%
GO_SOMATIC_STEM_CELL_POPULATION_MAINTENANCE	54	0.171973	1.50682	0.0714286	0.33173	1	2489	tags=35%, list=18%, signal=43%
GO_HEMATOPOIETIC_PROGENITOR_CELL_DIFFERENTIATION	146	0.108583	1.50458	0.0684411	0.334181	1	9758	tags=82%, list=71%, signal=276%
GO_POSITIVE_REGULATION_OF_INTERLEUKIN_8_PRODUCTION	30	0.232679	1.50397	0.0701403	0.33419	1	9209	tags=90%, list=67%, signal=270%
GO_NUCLEAR_TRANSCRIBED_MRNA_CATABOLIC_PROCESS_EXONUCLEOLYTIC	34	0.218203	1.50309	0.0673077	0.334712	1	6732	tags=71%, list=49%, signal=138%
GO_REGULATION_OF_POSTSYNAPTIC_MEMBRANE_NEUROTRANSMITTER_RECEPTOR_LEVELS	62	0.160681	1.50305	0.0779727	0.33393	1	6468	tags=63%, list=47%, signal=118%
GO_NEGATIVE_REGULATION_OF_SIGNAL_TRANSDUCTION_BY_P53_CLASS_MEDIATOR	28	0.23901	1.50296	0.0686275	0.333238	1	3605	tags=50%, list=26%, signal=68%
GO_PROSTATE_GLAND_MORPHOGENESIS	24	0.256392	1.50295	0.0702811	0.332415	1	4514	tags=58%, list=33%, signal=87%
GO_PROTEASOMAL_PROTEIN_CATABOLIC_PROCESS	434	0.0632926	1.50287	0.0776699	0.331719	1	11324	tags=88%, list=82%, signal=478%
GO_RECEPTOR_CLUSTERING	51	0.183235	1.50228	0.0764706	0.331706	1	7757	tags=75%, list=56%, signal=170%
GO_POSITIVE_REGULATION_OF_CELL_CYCLE_PHASE_TRANSITION	84	0.140283	1.50021	0.0692464	0.333826	1	5300	tags=52%, list=38%, signal=85%
GO_DNA_BIOSYNTHETIC_PROCESS	170	0.0999585	1.49962	0.0698603	0.333855	1	3586	tags=36%, list=26%, signal=48%
GO_PROTEIN_DEMETHYLATION	29	0.232873	1.49915	0.0761905	0.333677	1	8683	tags=86%, list=63%, signal=232%
GO_IONOTROPIC_GLUTAMATE_RECEPTOR_SIGNALING_PATHWAY	23	0.260453	1.49891	0.0497018	0.333219	1	4208	tags=57%, list=31%, signal=81%
GO_AXONAL_FASCICULATION	23	0.256853	1.4986	0.0623701	0.332884	1	6656	tags=74%, list=48%, signal=143%
GO_POSITIVE_REGULATION_OF_VASOCONSTRICTION	22	0.263236	1.49752	0.0672098	0.333593	1	3270	tags=50%, list=24%, signal=65%
GO_MULTI_ORGANISM_CELLULAR_PROCESS	35	0.214784	1.49552	0.0699589	0.335893	1	4925	tags=57%, list=36%, signal=89%
GO_POSITIVE_REGULATION_OF_WNT_SIGNALING_PATHWAY	163	0.099135	1.49541	0.0763052	0.33523	1	3386	tags=34%, list=25%, signal=45%
GO_PROTEIN_DNA_COMPLEX_DISASSEMBLY	17	0.304026	1.49394	0.0813704	0.336753	1	1490	tags=41%, list=11%, signal=46%
GO_MITOTIC_SISTER_CHROMATID_SEGREGATION	134	0.110564	1.4927	0.0743802	0.337752	1	9810	tags=82%, list=71%, signal=282%
GO_REGULATION_OF_KIDNEY_DEVELOPMENT	41	0.200585	1.49214	0.0678643	0.337723	1	4641	tags=54%, list=34%, signal=81%
GO_MYELOID_CELL_HOMEOSTASIS	121	0.114042	1.49045	0.0689655	0.339494	1	3227	tags=35%, list=23%, signal=45%
GO_ENDOPLASMIC_RETICULUM_TO_GOLGI_VESICLE_MEDIATED_TRANSPORT	183	0.0943695	1.49008	0.0795229	0.339216	1	10245	tags=84%, list=74%, signal=321%
GO_REGULATION_OF_CELLULAR_RESPONSE_TO_HEAT	76	0.146764	1.48728	0.0746888	0.342596	1	7785	tags=71%, list=56%, signal=162%
GO_VESICLE_CARGO_LOADING	18	0.282763	1.48388	0.0711462	0.346911	1	7597	tags=83%, list=55%, signal=185%
GO_STEROID_HORMONE_MEDIATED_SIGNALING_PATHWAY	154	0.103245	1.48381	0.0907372	0.346174	1	7994	tags=68%, list=58%, signal=160%
GO_PIGMENT_CELL_DIFFERENTIATION	31	0.225832	1.48358	0.0665362	0.345722	1	2230	tags=39%, list=16%, signal=46%
GO_MESODERM_MORPHOGENESIS	53	0.170847	1.48357	0.0846774	0.344902	1	7800	tags=74%, list=57%, signal=169%
GO_APPENDAGE_MORPHOGENESIS	118	0.118994	1.48352	0.0700389	0.344136	1	4800	tags=47%, list=35%, signal=71%
GO_REGULATION_OF_MORPHOGENESIS_OF_A_BRANCHING_STRUCTURE	43	0.18965	1.48289	0.0674847	0.344309	1	5089	tags=56%, list=37%, signal=88%
GO_REGULATION_OF_BONE_MINERALIZATION	59	0.163045	1.48232	0.0802348	0.34439	1	1500	tags=27%, list=11%, signal=30%
GO_KINETOCHORE_ORGANIZATION	20	0.280916	1.48038	0.0748988	0.346477	1	3026	tags=50%, list=22%, signal=64%
GO_INTERLEUKIN_8_PRODUCTION	48	0.180515	1.48004	0.0773694	0.346195	1	9298	tags=85%, list=67%, signal=261%
GO_MESENCHYME_MORPHOGENESIS	41	0.197618	1.47781	0.0761905	0.348755	1	6700	tags=68%, list=49%, signal=132%
GO_SIGNAL_TRANSDUCTION_BY_P53_CLASS_MEDIATOR	245	0.0811282	1.47742	0.0870406	0.348437	1	6274	tags=53%, list=45%, signal=96%
GO_NEGATIVE_REGULATION_OF_ANIMAL_ORGAN_MORPHOGENESIS	25	0.241374	1.47635	0.0842912	0.349341	1	1641	tags=36%, list=12%, signal=41%
GO_MULTICELLULAR_ORGANISMAL_RESPONSE_TO_STRESS	63	0.1589	1.47077	0.0823293	0.356844	1	1539	tags=27%, list=11%, signal=30%
GO_NEGATIVE_REGULATION_OF_BMP_SIGNALING_PATHWAY	39	0.196766	1.46883	0.0858283	0.358918	1	4719	tags=54%, list=34%, signal=82%
GO_POSITIVE_REGULATION_OF_MACROPHAGE_MIGRATION	15	0.312457	1.46791	0.0930693	0.359441	1	5808	tags=73%, list=42%, signal=127%
GO_PROTEIN_KINASE_C_ACTIVATING_G_PROTEIN_COUPLED_RECEPTOR_SIGNALING_PATHWAY	23	0.255214	1.46648	0.0930693	0.36089	1	9077	tags=91%, list=66%, signal=267%
GO_REGULATION_OF_MESENCHYMAL_CELL_PROLIFERATION	30	0.225914	1.46497	0.0883534	0.362432	1	7923	tags=80%, list=57%, signal=188%
GO_HISTONE_H3_ACETYLATION	53	0.169828	1.46387	0.0606654	0.363341	1	7814	tags=74%, list=57%, signal=169%
GO_POSITIVE_REGULATION_OF_OSSIFICATION	73	0.148785	1.46206	0.0787402	0.365447	1	2492	tags=33%, list=18%, signal=40%
GO_LENS_DEVELOPMENT_IN_CAMERA_TYPE_EYE	58	0.163196	1.46195	0.0862069	0.364771	1	3940	tags=45%, list=29%, signal=62%
GO_LABYRINTHINE_LAYER_DEVELOPMENT	40	0.195593	1.46181	0.0876494	0.36412	1	5584	tags=60%, list=40%, signal=101%
GO_POSITIVE_REGULATION_OF_PROTEIN_EXPORT_FROM_NUCLEUS	20	0.272184	1.46126	0.0859539	0.364076	1	6594	tags=75%, list=48%, signal=144%
GO_EPITHELIAL_TUBE_BRANCHING_INVOLVED_IN_LUNG_MORPHOGENESIS	24	0.250654	1.46101	0.0800821	0.363635	1	9190	tags=92%, list=67%, signal=274%
GO_PROTEIN_DESTABILIZATION	40	0.191755	1.46092	0.0571992	0.362973	1	5292	tags=58%, list=38%, signal=93%
GO_REGULATION_OF_POSTTRANSCRIPTIONAL_GENE_SILENCING	80	0.137047	1.4598	0.0743802	0.363851	1	5705	tags=55%, list=41%, signal=93%
GO_REGULATION_OF_NEURON_PROJECTION_DEVELOPMENT	453	0.060198	1.45845	0.0803922	0.365171	1	2484	tags=24%, list=18%, signal=28%
GO_RESPONSE_TO_INTERFERON_ALPHA	17	0.298047	1.45801	0.0823293	0.365013	1	7251	tags=82%, list=53%, signal=173%
GO_SALIVARY_GLAND_DEVELOPMENT	34	0.211845	1.45729	0.0901961	0.365271	1	5197	tags=59%, list=38%, signal=94%
GO_REGULATION_OF_TELOMERE_MAINTENANCE_VIA_TELOMERE_LENGTHENING	58	0.163875	1.45662	0.088	0.365543	1	4644	tags=50%, list=34%, signal=75%
GO_TRANSLATIONAL_TERMINATION	103	0.125357	1.45496	0.077821	0.367219	1	8459	tags=74%, list=61%, signal=189%
GO_CELL_MIGRATION_INVOLVED_IN_SPROUTING_ANGIOGENESIS	50	0.17385	1.45455	0.0742268	0.367103	1	6988	tags=68%, list=51%, signal=137%
GO_N_TERMINAL_PROTEIN_AMINO_ACID_MODIFICATION	27	0.231651	1.45215	0.0863454	0.370045	1	4983	tags=59%, list=36%, signal=93%
GO_BRANCHING_INVOLVED_IN_SALIVARY_GLAND_MORPHOGENESIS	20	0.273484	1.45083	0.0813008	0.371408	1	5197	tags=65%, list=38%, signal=104%
GO_CELL_FATE_COMMITMENT	170	0.0952664	1.44989	0.0825147	0.372093	1	5678	tags=51%, list=41%, signal=85%
GO_POSITIVE_REGULATION_OF_SUBSTRATE_ADHESION_DEPENDENT_CELL_SPREADING	31	0.216145	1.44958	0.086	0.37175	1	6812	tags=71%, list=49%, signal=140%
GO_POSITIVE_REGULATION_OF_NEURON_PROJECTION_DEVELOPMENT	252	0.0791936	1.44923	0.0789474	0.371482	1	2484	tags=26%, list=18%, signal=31%
GO_DNA_GEOMETRIC_CHANGE	89	0.1293	1.4482	0.0767635	0.372199	1	6285	tags=58%, list=46%, signal=107%
GO_MITOTIC_SPINDLE_ORGANIZATION	99	0.126252	1.44667	0.0774059	0.373702	1	9136	tags=79%, list=66%, signal=232%
GO_NEGATIVE_REGULATION_OF_TYPE_I_INTERFERON_PRODUCTION	38	0.198362	1.44629	0.0898876	0.373474	1	10699	tags=97%, list=78%, signal=433%
GO_HISTONE_H3_K9_METHYLATION	34	0.20836	1.44613	0.082495	0.372901	1	2000	tags=35%, list=15%, signal=41%
GO_FOREBRAIN_GENERATION_OF_NEURONS	57	0.164452	1.44516	0.0941884	0.373526	1	8870	tags=81%, list=64%, signal=225%
GO_NEGATIVE_REGULATION_OF_CELL_CYCLE_PROCESS	295	0.0720426	1.44484	0.074364	0.373162	1	10714	tags=85%, list=78%, signal=372%
GO_GOLGI_VESICLE_BUDDING	75	0.140694	1.44403	0.0895833	0.37365	1	7631	tags=69%, list=55%, signal=154%
GO_RNA_DEPENDENT_DNA_BIOSYNTHETIC_PROCESS	68	0.149216	1.44233	0.0909091	0.37564	1	4644	tags=49%, list=34%, signal=73%
GO_VESICLE_BUDDING_FROM_MEMBRANE	94	0.128321	1.44113	0.093361	0.376859	1	7631	tags=68%, list=55%, signal=151%
GO_RESPONSE_TO_FIBROBLAST_GROWTH_FACTOR	116	0.115537	1.44071	0.0932039	0.376718	1	2699	tags=31%, list=20%, signal=38%
GO_REGULATION_OF_VIRAL_TRANSCRIPTION	57	0.165345	1.44054	0.0836653	0.37616	1	7648	tags=72%, list=55%, signal=161%
GO_REGULATION_OF_MRNA_POLYADENYLATION	15	0.31597	1.43845	0.109312	0.378716	1	6679	tags=80%, list=48%, signal=155%
GO_REGULATION_OF_SMOOTHENED_SIGNALING_PATHWAY	71	0.14911	1.4375	0.109804	0.37945	1	1838	tags=28%, list=13%, signal=32%
GO_REGULATION_OF_INTRINSIC_APOPTOTIC_SIGNALING_PATHWAY_BY_P53_CLASS_MEDIATOR	26	0.238976	1.43603	0.0898204	0.380978	1	3605	tags=50%, list=26%, signal=68%
GO_CYTOPLASMIC_TRANSLATION	87	0.12884	1.43503	0.0873786	0.381906	1	8537	tags=75%, list=62%, signal=195%
GO_NEGATIVE_REGULATION_OF_EXOCYTOSIS	29	0.217896	1.43489	0.0955166	0.381302	1	7938	tags=79%, list=58%, signal=186%
GO_AXON_DEVELOPMENT	455	0.0587484	1.43483	0.0958333	0.380594	1	2489	tags=24%, list=18%, signal=28%
GO_RESPONSE_TO_ACETYLCHOLINE	25	0.23864	1.43442	0.0973085	0.380454	1	1127	tags=32%, list=8%, signal=35%
GO_POSITIVE_REGULATION_OF_NOTCH_SIGNALING_PATHWAY	43	0.182553	1.43433	0.0833333	0.379815	1	5828	tags=60%, list=42%, signal=104%
GO_TUMOR_NECROSIS_FACTOR_MEDIATED_SIGNALING_PATHWAY	124	0.11079	1.43414	0.0865191	0.37932	1	10830	tags=90%, list=79%, signal=413%
GO_RNA_PHOSPHODIESTER_BOND_HYDROLYSIS_EXONUCLEOLYTIC	37	0.19969	1.43369	0.108527	0.379228	1	10298	tags=95%, list=75%, signal=372%
GO_HORMONE_MEDIATED_SIGNALING_PATHWAY	185	0.0912332	1.43348	0.102823	0.378783	1	5765	tags=51%, list=42%, signal=86%
GO_BONE_MATURATION	17	0.288053	1.43288	0.0948617	0.378953	1	1710	tags=41%, list=12%, signal=47%
GO_POSITIVE_REGULATION_OF_BEHAVIOR	18	0.281021	1.43234	0.103672	0.379006	1	3024	tags=50%, list=22%, signal=64%
GO_MONOAMINE_TRANSPORT	65	0.151418	1.43151	0.0887097	0.379555	1	891	tags=22%, list=6%, signal=23%
GO_INTRA_GOLGI_VESICLE_MEDIATED_TRANSPORT	29	0.220778	1.43124	0.0916335	0.379145	1	9325	tags=90%, list=68%, signal=276%
GO_REPRODUCTIVE_SYSTEM_DEVELOPMENT	333	0.0681199	1.43099	0.0758483	0.378727	1	8152	tags=66%, list=59%, signal=157%
GO_MRNA_MODIFICATION	18	0.280525	1.43026	0.0856574	0.379155	1	3797	tags=56%, list=28%, signal=77%
GO_GLYCOSYL_COMPOUND_METABOLIC_PROCESS	51	0.16778	1.4295	0.0974155	0.379608	1	4454	tags=49%, list=32%, signal=72%
GO_POSITIVE_REGULATION_OF_BLOOD_VESSEL_ENDOTHELIAL_CELL_MIGRATION	52	0.166129	1.42929	0.0961924	0.379154	1	3286	tags=40%, list=24%, signal=53%
GO_REGIONALIZATION	232	0.0809772	1.42928	0.101031	0.378398	1	2646	tags=27%, list=19%, signal=33%
GO_REGULATION_OF_RELEASE_OF_SEQUESTERED_CALCIUM_ION_INTO_CYTOSOL	65	0.149057	1.42569	0.0823045	0.383358	1	7925	tags=72%, list=57%, signal=169%
GO_POSITIVE_REGULATION_OF_DNA_METABOLIC_PROCESS	139	0.10465	1.42449	0.0861057	0.384496	1	5317	tags=49%, list=39%, signal=79%
GO_MITOTIC_CYTOKINETIC_PROCESS	22	0.246951	1.42313	0.096	0.385912	1	9136	tags=91%, list=66%, signal=269%
GO_RESPONSE_TO_VIRUS	219	0.0831759	1.42146	0.0854871	0.387876	1	8379	tags=69%, list=61%, signal=173%
GO_REGULATION_OF_AXONOGENESIS	176	0.0934956	1.41922	0.105578	0.390729	1	7032	tags=60%, list=51%, signal=121%
GO_CELLULAR_RESPONSE_TO_IONIZING_RADIATION	66	0.148747	1.41913	0.0954274	0.390104	1	4644	tags=48%, list=34%, signal=73%
GO_GUANOSINE_CONTAINING_COMPOUND_METABOLIC_PROCESS	23	0.248178	1.41864	0.106719	0.390053	1	4377	tags=57%, list=32%, signal=83%
GO_REGULATION_OF_AMYLOID_PRECURSOR_PROTEIN_CATABOLIC_PROCESS	28	0.222566	1.41844	0.0967742	0.389519	1	6294	tags=68%, list=46%, signal=125%
GO_REGULATION_OF_CELLULAR_AMINE_METABOLIC_PROCESS	70	0.14457	1.41719	0.102345	0.39077	1	6881	tags=64%, list=50%, signal=128%
GO_APPENDAGE_DEVELOPMENT	139	0.104076	1.41705	0.0956175	0.390218	1	2646	tags=29%, list=19%, signal=36%
GO_CHROMATIN_ORGANIZATION_INVOLVED_IN_REGULATION_OF_TRANSCRIPTION	74	0.140116	1.41633	0.110895	0.390604	1	7768	tags=70%, list=56%, signal=160%
GO_ESTABLISHMENT_OR_MAINTENANCE_OF_CELL_POLARITY	190	0.087807	1.4159	0.0936903	0.39053	1	6789	tags=58%, list=49%, signal=112%
GO_PROSTATE_GLAND_DEVELOPMENT	40	0.187788	1.41484	0.10148	0.391462	1	4657	tags=52%, list=34%, signal=79%
GO_EPITHELIAL_CELL_DEVELOPMENT	172	0.0939185	1.41355	0.10757	0.392865	1	4092	tags=39%, list=30%, signal=55%
GO_TYPE_I_INTERFERON_PRODUCTION	110	0.115966	1.41349	0.11245	0.392163	1	10699	tags=89%, list=78%, signal=394%
GO_TAXIS	467	0.0572632	1.41191	0.105675	0.393941	1	3016	tags=27%, list=22%, signal=34%
GO_NEGATIVE_REGULATION_OF_CHONDROCYTE_DIFFERENTIATION	17	0.284778	1.41188	0.104743	0.393223	1	8245	tags=88%, list=60%, signal=219%
GO_PROTEIN_K11_LINKED_UBIQUITINATION	28	0.216876	1.41147	0.0962672	0.393101	1	8835	tags=86%, list=64%, signal=238%
GO_NEGATIVE_REGULATION_OF_EMBRYONIC_DEVELOPMENT	23	0.241906	1.41144	0.102767	0.392375	1	8061	tags=83%, list=58%, signal=198%
GO_CANONICAL_WNT_SIGNALING_PATHWAY	290	0.0720907	1.40914	0.0990099	0.395235	1	3591	tags=33%, list=26%, signal=44%
GO_NEGATIVE_REGULATION_OF_CARTILAGE_DEVELOPMENT	21	0.259612	1.40905	0.114943	0.394585	1	8245	tags=86%, list=60%, signal=213%
GO_POSITIVE_REGULATION_OF_LYMPHOCYTE_ACTIVATION	199	0.0844304	1.40653	0.0996094	0.398093	1	7029	tags=59%, list=51%, signal=119%
GO_POSITIVE_REGULATION_OF_PROTEIN_AUTOPHOSPHORYLATION	25	0.238966	1.40644	0.108911	0.397435	1	4984	tags=60%, list=36%, signal=94%
GO_NIK_NF_KAPPAB_SIGNALING	139	0.101977	1.40497	0.105263	0.399034	1	11108	tags=91%, list=81%, signal=461%
GO_NUCLEIC_ACID_PHOSPHODIESTER_BOND_HYDROLYSIS	250	0.0774197	1.40349	0.106122	0.400676	1	9156	tags=74%, list=66%, signal=216%
GO_SMOOTH_MUSCLE_CELL_DIFFERENTIATION	51	0.163601	1.40208	0.100592	0.402202	1	4241	tags=47%, list=31%, signal=68%
GO_NEURON_APOPTOTIC_PROCESS	209	0.0852722	1.40184	0.11002	0.401834	1	2668	tags=28%, list=19%, signal=34%
GO_DNA_CATABOLIC_PROCESS_ENDONUCLEOLYTIC	28	0.224287	1.40144	0.105263	0.401752	1	8733	tags=86%, list=63%, signal=233%
GO_SENSORY_ORGAN_DEVELOPMENT	422	0.0596703	1.40117	0.103792	0.401398	1	3417	tags=31%, list=25%, signal=39%
GO_SEX_DIFFERENTIATION	205	0.0839412	1.40115	0.104082	0.40066	1	8075	tags=67%, list=59%, signal=159%
GO_GLANDULAR_EPITHELIAL_CELL_DEVELOPMENT	23	0.241107	1.4011	0.102725	0.399976	1	8072	tags=83%, list=59%, signal=199%
GO_PROTEIN_INSERTION_INTO_MITOCHONDRIAL_MEMBRANE	45	0.172768	1.4008	0.102397	0.399659	1	8044	tags=76%, list=58%, signal=181%
GO_GLIAL_CELL_MIGRATION	44	0.176093	1.39988	0.0927419	0.400482	1	1026	tags=25%, list=7%, signal=27%
GO_LEUKOCYTE_TETHERING_OR_ROLLING	17	0.278372	1.39985	0.104478	0.39975	1	7522	tags=82%, list=55%, signal=181%
GO_STEROL_BIOSYNTHETIC_PROCESS	64	0.151382	1.39923	0.108949	0.399994	1	4601	tags=48%, list=33%, signal=72%
GO_CELLULAR_RESPONSE_TO_RETINOIC_ACID	56	0.158654	1.39864	0.111111	0.400272	1	6193	tags=61%, list=45%, signal=110%
GO_NCRNA_PROCESSING	340	0.0661816	1.39773	0.102913	0.400985	1	4828	tags=41%, list=35%, signal=62%
GO_SISTER_CHROMATID_COHESION	43	0.183112	1.39594	0.10142	0.403118	1	3896	tags=47%, list=28%, signal=65%
GO_NEURON_PROJECTION_GUIDANCE	238	0.0777685	1.39509	0.106719	0.403749	1	2132	tags=23%, list=15%, signal=27%
GO_REGULATION_OF_TRANSCRIPTION_REGULATORY_REGION_DNA_BINDING	38	0.188958	1.394	0.112245	0.404826	1	3207	tags=42%, list=23%, signal=55%
GO_POSITIVE_REGULATION_OF_BMP_SIGNALING_PATHWAY	26	0.231306	1.39257	0.10536	0.406202	1	4241	tags=54%, list=31%, signal=78%
GO_POSITIVE_REGULATION_OF_DNA_REPLICATION	32	0.209642	1.39231	0.113208	0.405884	1	4441	tags=53%, list=32%, signal=78%
GO_T_CELL_SELECTION	30	0.214636	1.3921	0.104536	0.405518	1	5320	tags=60%, list=39%, signal=97%
GO_REGULATION_OF_SYNAPSE_STRUCTURE_OR_ACTIVITY	214	0.0812438	1.39036	0.113949	0.407566	1	6887	tags=58%, list=50%, signal=114%
GO_ENDOCARDIAL_CUSHION_DEVELOPMENT	37	0.19029	1.38906	0.104743	0.408965	1	6700	tags=68%, list=49%, signal=131%
GO_CYTOPLASMIC_PATTERN_RECOGNITION_RECEPTOR_SIGNALING_PATHWAY_IN_RESPONSE_TO_VIRUS	22	0.238299	1.38879	0.135802	0.408627	1	9882	tags=95%, list=72%, signal=336%
GO_ACTIN_FILAMENT_BUNDLE_ORGANIZATION	137	0.100792	1.38842	0.117764	0.408484	1	3354	tags=34%, list=24%, signal=45%
GO_SUBPALLIUM_DEVELOPMENT	23	0.241944	1.38673	0.107143	0.410626	1	2664	tags=43%, list=19%, signal=54%
GO_REGULATION_OF_LAMELLIPODIUM_ORGANIZATION	42	0.181478	1.38574	0.109533	0.411502	1	8668	tags=81%, list=63%, signal=217%
GO_EYE_MORPHOGENESIS	120	0.107298	1.3856	0.101266	0.410995	1	4853	tags=46%, list=35%, signal=70%
GO_POSITIVE_REGULATION_OF_CHROMOSOME_SEGREGATION	26	0.226044	1.3852	0.11499	0.410867	1	3783	tags=50%, list=27%, signal=69%
GO_POSITIVE_REGULATION_OF_CHEMOTAXIS	99	0.117521	1.38473	0.110647	0.410811	1	7166	tags=64%, list=52%, signal=132%
GO_VENTRICULAR_CARDIAC_MUSCLE_CELL_ACTION_POTENTIAL	28	0.225607	1.38425	0.13745	0.410864	1	4282	tags=54%, list=31%, signal=78%
GO_FIBROBLAST_PROLIFERATION	75	0.139595	1.38403	0.108481	0.41045	1	4704	tags=48%, list=34%, signal=72%
GO_POSITIVE_REGULATION_OF_VASCULAR_ENDOTHELIAL_GROWTH_FACTOR_PRODUCTION	20	0.25684	1.38336	0.116327	0.410831	1	2668	tags=45%, list=19%, signal=56%
GO_REGULATION_OF_INNATE_IMMUNE_RESPONSE	323	0.0667917	1.38271	0.10495	0.411205	1	12250	tags=95%, list=89%, signal=833%
GO_EMBRYONIC_CAMERA_TYPE_EYE_DEVELOPMENT	34	0.195468	1.38218	0.105691	0.411413	1	7856	tags=76%, list=57%, signal=177%
GO_DOUBLE_STRAND_BREAK_REPAIR	193	0.0873524	1.38184	0.131474	0.411245	1	8029	tags=67%, list=58%, signal=158%
GO_RESPONSE_TO_IONIZING_RADIATION	136	0.100806	1.38132	0.121212	0.411335	1	5518	tags=50%, list=40%, signal=83%
GO_ESTABLISHMENT_OF_EPITHELIAL_CELL_POLARITY	27	0.225185	1.38129	0.127953	0.410619	1	9669	tags=93%, list=70%, signal=309%
GO_GLUTAMATE_RECEPTOR_SIGNALING_PATHWAY	94	0.121159	1.38112	0.127237	0.410157	1	4208	tags=43%, list=31%, signal=61%
GO_PROXIMAL_DISTAL_PATTERN_FORMATION	21	0.249123	1.37992	0.131737	0.41137	1	2479	tags=43%, list=18%, signal=52%
GO_CELLULAR_RESPONSE_TO_BIOTIC_STIMULUS	161	0.093134	1.3799	0.114519	0.410632	1	11664	tags=94%, list=85%, signal=601%
GO_NEGATIVE_REGULATION_OF_DNA_METABOLIC_PROCESS	70	0.139701	1.37921	0.11875	0.411074	1	9706	tags=84%, list=70%, signal=283%
GO_MATURATION_OF_LSU_RRNA	19	0.26315	1.37629	0.126195	0.415278	1	5085	tags=63%, list=37%, signal=100%
GO_ACTIVATION_OF_PHOSPHOLIPASE_C_ACTIVITY	20	0.25391	1.37607	0.119231	0.414907	1	4777	tags=60%, list=35%, signal=92%
GO_POSITIVE_REGULATION_OF_NEURAL_PRECURSOR_CELL_PROLIFERATION	45	0.175086	1.37519	0.141221	0.415636	1	4641	tags=51%, list=34%, signal=77%
GO_CYTOPLASMIC_MICROTUBULE_ORGANIZATION	51	0.161962	1.37422	0.0953347	0.416467	1	5886	tags=59%, list=43%, signal=102%
GO_POSITIVE_REGULATION_OF_TRANSCRIPTION_ELONGATION_FROM_RNA_POLYMERASE_II_PROMOTER	17	0.276796	1.37323	0.140281	0.417341	1	5110	tags=65%, list=37%, signal=103%
GO_POSITIVE_REGULATION_OF_BINDING	156	0.0947561	1.37208	0.108871	0.418578	1	3304	tags=33%, list=24%, signal=43%
GO_REGULATION_OF_TRANS_SYNAPTIC_SIGNALING	393	0.0607012	1.37149	0.118343	0.418867	1	3888	tags=34%, list=28%, signal=46%
GO_POSITIVE_REGULATION_OF_TRANSCRIPTION_BY_RNA_POLYMERASE_I	21	0.252869	1.37093	0.122807	0.419051	1	5711	tags=67%, list=41%, signal=114%
GO_INNATE_IMMUNE_RESPONSE_ACTIVATING_CELL_SURFACE_RECEPTOR_SIGNALING_PATHWAY	89	0.124829	1.36978	0.114068	0.420275	1	10685	tags=90%, list=77%, signal=397%
GO_REGULATION_OF_STEM_CELL_DIFFERENTIATION	97	0.117936	1.36971	0.117188	0.419639	1	9758	tags=82%, list=71%, signal=280%
GO_LUNG_MORPHOGENESIS	40	0.184085	1.36878	0.146091	0.420462	1	9190	tags=85%, list=67%, signal=254%
GO_REGULATION_OF_RESPONSE_TO_DNA_DAMAGE_STIMULUS	186	0.0836837	1.36793	0.109562	0.421182	1	6275	tags=54%, list=46%, signal=97%
GO_DENDRITIC_CELL_MIGRATION	19	0.261564	1.36755	0.126733	0.421133	1	4381	tags=58%, list=32%, signal=85%
GO_HOMEOSTASIS_OF_NUMBER_OF_CELLS_WITHIN_A_TISSUE	27	0.224031	1.36653	0.14553	0.422088	1	7131	tags=74%, list=52%, signal=153%
GO_AUTOPHAGOSOME_MATURATION	34	0.202291	1.36643	0.103239	0.421499	1	8979	tags=85%, list=65%, signal=244%
GO_PROTEIN_FOLDING_IN_ENDOPLASMIC_RETICULUM	15	0.294614	1.36402	0.116667	0.424839	1	4215	tags=60%, list=31%, signal=86%
GO_RESPONSE_TO_INTERLEUKIN_12	42	0.18114	1.36334	0.137652	0.425241	1	4404	tags=50%, list=32%, signal=73%
GO_REGULATION_OF_TOLL_LIKE_RECEPTOR_SIGNALING_PATHWAY	56	0.154393	1.36285	0.117296	0.425329	1	9453	tags=84%, list=69%, signal=266%
GO_POSTSYNAPTIC_SPECIALIZATION_ORGANIZATION	34	0.195199	1.36225	0.122244	0.425613	1	5426	tags=59%, list=39%, signal=97%
GO_REGULATION_OF_PEPTIDYL_THREONINE_PHOSPHORYLATION	40	0.184159	1.36094	0.127273	0.427015	1	6086	tags=63%, list=44%, signal=112%
GO_LEUKOCYTE_APOPTOTIC_PROCESS	77	0.134568	1.36034	0.123732	0.427306	1	5855	tags=56%, list=42%, signal=97%
GO_AMINO_ACID_ACTIVATION	48	0.163861	1.35818	0.124	0.430192	1	7803	tags=73%, list=57%, signal=167%
GO_HEPARAN_SULFATE_PROTEOGLYCAN_METABOLIC_PROCESS	35	0.193642	1.35775	0.110647	0.430125	1	7580	tags=74%, list=55%, signal=165%
GO_REGULATION_OF_BIOMINERAL_TISSUE_DEVELOPMENT	70	0.142794	1.35751	0.126984	0.429774	1	1783	tags=27%, list=13%, signal=31%
GO_REGULATION_OF_SUBSTRATE_ADHESION_DEPENDENT_CELL_SPREADING	43	0.180965	1.35669	0.142566	0.430439	1	6812	tags=67%, list=49%, signal=133%
GO_CENTRAL_NERVOUS_SYSTEM_NEURON_AXONOGENESIS	34	0.197003	1.3566	0.123772	0.429876	1	1345	tags=29%, list=10%, signal=33%
GO_POSITIVE_REGULATION_OF_DOUBLE_STRAND_BREAK_REPAIR	27	0.22437	1.35645	0.128302	0.429406	1	5594	tags=63%, list=41%, signal=106%
GO_REGULATION_OF_HISTONE_H3_K9_METHYLATION	20	0.255276	1.35641	0.126214	0.428753	1	2000	tags=40%, list=15%, signal=47%
GO_DENDRITIC_SPINE_DEVELOPMENT	88	0.122857	1.35554	0.133462	0.429488	1	6308	tags=58%, list=46%, signal=106%
GO_REGULATION_OF_DNA_RECOMBINATION	72	0.137528	1.35528	0.138493	0.429189	1	6157	tags=58%, list=45%, signal=105%
GO_POSITIVE_REGULATION_OF_DNA_BINDING	47	0.165169	1.35414	0.122137	0.430401	1	3304	tags=40%, list=24%, signal=53%
GO_POSITIVE_REGULATION_OF_LAMELLIPODIUM_ORGANIZATION	27	0.219324	1.35414	0.129213	0.429667	1	6685	tags=70%, list=48%, signal=136%
GO_NEGATIVE_REGULATION_OF_EPITHELIAL_TO_MESENCHYMAL_TRANSITION	22	0.235318	1.35411	0.135849	0.428968	1	5535	tags=64%, list=40%, signal=106%
GO_EMBRYONIC_AXIS_SPECIFICATION	27	0.218477	1.35367	0.134503	0.428987	1	8229	tags=81%, list=60%, signal=202%
GO_NEGATIVE_REGULATION_OF_CALCIUM_MEDIATED_SIGNALING	25	0.225686	1.35344	0.127953	0.428646	1	7925	tags=80%, list=57%, signal=188%
GO_ORGANELLE_FISSION	381	0.061237	1.35268	0.129225	0.429191	1	10797	tags=84%, list=78%, signal=377%
GO_REGULATION_OF_DENDRITE_DEVELOPMENT	135	0.0990529	1.35244	0.116803	0.428826	1	6308	tags=56%, list=46%, signal=101%
GO_MORPHOGENESIS_OF_AN_EPITHELIAL_SHEET	47	0.167484	1.35181	0.128099	0.429089	1	7967	tags=74%, list=58%, signal=176%
GO_FIBROBLAST_APOPTOTIC_PROCESS	18	0.259106	1.35083	0.132114	0.430071	1	8689	tags=89%, list=63%, signal=240%
GO_POSITIVE_REGULATION_OF_CELL_ACTIVATION	235	0.0748206	1.3505	0.141762	0.429867	1	6203	tags=52%, list=45%, signal=94%
GO_MELANOCYTE_DIFFERENTIATION	22	0.236767	1.34707	0.13278	0.435019	1	1127	tags=32%, list=8%, signal=35%
GO_POSITIVE_REGULATION_OF_VIRAL_RELEASE_FROM_HOST_CELL	15	0.288531	1.34683	0.164969	0.434671	1	7057	tags=80%, list=51%, signal=164%
GO_REGULATION_OF_DNA_TEMPLATED_TRANSCRIPTION_ELONGATION	45	0.169101	1.34559	0.114919	0.436066	1	7175	tags=69%, list=52%, signal=143%
GO_CALCIUM_ION_TRANSMEMBRANE_IMPORT_INTO_CYTOSOL	112	0.108841	1.34556	0.13745	0.435373	1	4790	tags=46%, list=35%, signal=69%
GO_EMBRYONIC_ORGAN_DEVELOPMENT	320	0.0665119	1.34528	0.133056	0.435111	1	4878	tags=42%, list=35%, signal=63%
GO_POSITIVE_REGULATION_OF_DNA_REPAIR	58	0.146641	1.34479	0.121622	0.435206	1	5594	tags=55%, list=41%, signal=92%
GO_REGULATION_OF_POSTSYNAPSE_ORGANIZATION	93	0.117743	1.34451	0.135354	0.434915	1	6987	tags=62%, list=51%, signal=126%
GO_AORTIC_VALVE_DEVELOPMENT	24	0.227982	1.34347	0.126882	0.436043	1	6629	tags=71%, list=48%, signal=136%
GO_MICROTUBULE_CYTOSKELETON_ORGANIZATION_INVOLVED_IN_MITOSIS	120	0.105047	1.34336	0.148936	0.4355	1	9136	tags=77%, list=66%, signal=225%
GO_POSITIVE_REGULATION_OF_RESPONSE_TO_DRUG	19	0.251456	1.3429	0.145038	0.435483	1	891	tags=32%, list=6%, signal=34%
GO_TRANSLATIONAL_ELONGATION	131	0.101046	1.3428	0.131373	0.434949	1	8304	tags=70%, list=60%, signal=175%
GO_PODOSOME_ASSEMBLY	16	0.281202	1.3424	0.135294	0.434907	1	2159	tags=44%, list=16%, signal=52%
GO_MEGAKARYOCYTE_DIFFERENTIATION	61	0.144321	1.34137	0.132653	0.435943	1	7739	tags=70%, list=56%, signal=160%
GO_BINDING_OF_SPERM_TO_ZONA_PELLUCIDA	20	0.246347	1.34084	0.13189	0.43611	1	9708	tags=95%, list=70%, signal=320%
GO_POSITIVE_REGULATION_OF_OSTEOBLAST_DIFFERENTIATION	53	0.158941	1.3406	0.144269	0.435796	1	2239	tags=32%, list=16%, signal=38%
GO_ANTERIOR_POSTERIOR_PATTERN_SPECIFICATION	134	0.0995389	1.33923	0.11753	0.437425	1	4403	tags=42%, list=32%, signal=61%
GO_GENITALIA_DEVELOPMENT	35	0.192778	1.33855	0.14053	0.437954	1	9168	tags=86%, list=66%, signal=255%
GO_SYMPATHETIC_NERVOUS_SYSTEM_DEVELOPMENT	15	0.29113	1.33825	0.109804	0.437715	1	4263	tags=60%, list=31%, signal=87%
GO_MEMORY	109	0.108737	1.33775	0.137577	0.437768	1	2560	tags=29%, list=19%, signal=36%
GO_EMBRYONIC_PLACENTA_MORPHOGENESIS	20	0.251844	1.336	0.141491	0.440023	1	5495	tags=65%, list=40%, signal=108%
GO_PROTEIN_K63_LINKED_DEUBIQUITINATION	29	0.208064	1.33395	0.136821	0.442968	1	5220	tags=59%, list=38%, signal=94%
GO_REGULATION_OF_EXCITATORY_SYNAPSE_ASSEMBLY	15	0.283696	1.33378	0.160985	0.442534	1	3446	tags=53%, list=25%, signal=71%
GO_DNA_CATABOLIC_PROCESS	34	0.190688	1.33318	0.145914	0.4428	1	8733	tags=82%, list=63%, signal=224%
GO_AXON_EXTENSION	111	0.108375	1.33317	0.124756	0.442095	1	6468	tags=58%, list=47%, signal=108%
GO_NEGATIVE_REGULATION_OF_NEUROLOGICAL_SYSTEM_PROCESS	15	0.287689	1.33239	0.152263	0.442797	1	3391	tags=53%, list=25%, signal=71%
GO_THYMOCYTE_APOPTOTIC_PROCESS	16	0.268684	1.33041	0.142056	0.445419	1	8365	tags=88%, list=61%, signal=222%
GO_INTERACTION_WITH_HOST	169	0.0881784	1.33027	0.118143	0.444984	1	7203	tags=61%, list=52%, signal=126%
GO_NEGATIVE_REGULATION_OF_LEUKOCYTE_MEDIATED_IMMUNITY	30	0.203597	1.32931	0.14257	0.445936	1	6851	tags=70%, list=50%, signal=139%
GO_SIGNAL_TRANSDUCTION_INVOLVED_IN_CELL_CYCLE_CHECKPOINT	69	0.134088	1.32866	0.122736	0.446399	1	8952	tags=78%, list=65%, signal=222%
GO_REGULATION_OF_CAMP_MEDIATED_SIGNALING	42	0.173296	1.32788	0.149402	0.446992	1	1885	tags=31%, list=14%, signal=36%
GO_EMBRYONIC_CAMERA_TYPE_EYE_MORPHOGENESIS	23	0.230446	1.32756	0.142023	0.446873	1	9418	tags=91%, list=68%, signal=287%
GO_RESPONSE_TO_AMYLOID_BETA	36	0.185187	1.32603	0.136735	0.4487	1	3198	tags=42%, list=23%, signal=54%
GO_POSITIVE_REGULATION_OF_NEURON_APOPTOTIC_PROCESS	47	0.165022	1.32585	0.146199	0.448249	1	5360	tags=55%, list=39%, signal=90%
GO_FC_RECEPTOR_SIGNALING_PATHWAY	162	0.0912963	1.32583	0.131148	0.447568	1	10758	tags=87%, list=78%, signal=391%
GO_OLIGOSACCHARIDE_LIPID_INTERMEDIATE_BIOSYNTHETIC_PROCESS	19	0.258274	1.3253	0.163227	0.447805	1	5878	tags=68%, list=43%, signal=119%
GO_PROTEIN_N_LINKED_GLYCOSYLATION	73	0.132307	1.32196	0.142857	0.452926	1	9708	tags=84%, list=70%, signal=281%
GO_ER_NUCLEUS_SIGNALING_PATHWAY	42	0.170812	1.32137	0.132812	0.453206	1	4546	tags=50%, list=33%, signal=74%
GO_PATTERN_RECOGNITION_RECEPTOR_SIGNALING_PATHWAY	149	0.0953235	1.32063	0.132812	0.453791	1	9898	tags=81%, list=72%, signal=285%
GO_POSITIVE_REGULATION_OF_SMOOTH_MUSCLE_CELL_PROLIFERATION	75	0.126136	1.31996	0.135189	0.454188	1	5808	tags=55%, list=42%, signal=94%
GO_MACROPHAGE_MIGRATION	30	0.201969	1.31961	0.140816	0.454046	1	5954	tags=63%, list=43%, signal=111%
GO_MESENCHYMAL_CELL_PROLIFERATION	39	0.176724	1.31907	0.146388	0.454274	1	4641	tags=51%, list=34%, signal=77%
GO_SIALYLATION	19	0.25436	1.31817	0.140725	0.455178	1	851	tags=32%, list=6%, signal=34%
GO_PYRIMIDINE_NUCLEOSIDE_MONOPHOSPHATE_BIOSYNTHETIC_PROCESS	16	0.27922	1.31674	0.157795	0.456973	1	6496	tags=75%, list=47%, signal=142%
GO_DNA_METHYLATION	51	0.158027	1.31654	0.172557	0.456627	1	4588	tags=49%, list=33%, signal=73%
GO_MYOTUBE_CELL_DEVELOPMENT	25	0.222513	1.31578	0.15493	0.45729	1	1349	tags=32%, list=10%, signal=35%
GO_NEGATIVE_REGULATION_OF_HISTONE_METHYLATION	19	0.253302	1.31509	0.146444	0.45776	1	8124	tags=84%, list=59%, signal=205%
GO_NEGATIVE_REGULATION_OF_CELL_CYCLE_G2_M_PHASE_TRANSITION	91	0.117117	1.31457	0.144	0.457941	1	10670	tags=89%, list=77%, signal=391%
GO_REGULATION_OF_PEPTIDYL_SERINE_PHOSPHORYLATION	102	0.114319	1.31425	0.15304	0.457764	1	1003	tags=19%, list=7%, signal=20%
GO_GLAND_MORPHOGENESIS	97	0.115203	1.31418	0.158228	0.457154	1	5388	tags=51%, list=39%, signal=82%
GO_DEVELOPMENTAL_PROCESS_INVOLVED_IN_REPRODUCTION	487	0.0512855	1.31323	0.143925	0.458222	1	8152	tags=64%, list=59%, signal=151%
GO_MITOCHONDRIAL_TRANSLATIONAL_TERMINATION	89	0.117653	1.31294	0.140873	0.457996	1	8459	tags=73%, list=61%, signal=188%
GO_RIG_I_SIGNALING_PATHWAY	16	0.268122	1.31291	0.154004	0.457358	1	4925	tags=63%, list=36%, signal=97%
GO_NEGATIVE_REGULATION_OF_APOPTOTIC_SIGNALING_PATHWAY	195	0.0828185	1.3118	0.14741	0.45866	1	3470	tags=33%, list=25%, signal=44%
GO_INTERLEUKIN_8_SECRETION	18	0.258549	1.31111	0.154959	0.459193	1	5632	tags=67%, list=41%, signal=113%
GO_SOMATIC_DIVERSIFICATION_OF_IMMUNE_RECEPTORS_VIA_GERMLINE_RECOMBINATION_WITHIN_A_SINGLE_LOCUS	41	0.178304	1.31065	0.138686	0.459311	1	4611	tags=51%, list=33%, signal=77%
GO_T_CELL_ACTIVATION	322	0.0633329	1.31034	0.144814	0.459149	1	9168	tags=73%, list=66%, signal=212%
GO_PHOTOTRANSDUCTION_VISIBLE_LIGHT	22	0.235714	1.30775	0.161034	0.463055	1	8037	tags=82%, list=58%, signal=196%
GO_VIRAL_GENE_EXPRESSION	178	0.0857685	1.30745	0.153518	0.46293	1	12390	tags=98%, list=90%, signal=955%
GO_RESPONSE_TO_X_RAY	28	0.201539	1.3072	0.167939	0.462674	1	8061	tags=79%, list=58%, signal=189%
GO_REGULATION_OF_CYTOSOLIC_CALCIUM_ION_CONCENTRATION	262	0.0708898	1.30616	0.153846	0.463826	1	2514	tags=25%, list=18%, signal=30%
GO_NEGATIVE_REGULATION_OF_CELL_DEVELOPMENT	280	0.0672412	1.30596	0.127835	0.463439	1	2489	tags=25%, list=18%, signal=29%
GO_REGULATION_OF_HEART_RATE_BY_CARDIAC_CONDUCTION	33	0.186695	1.30344	0.148077	0.467155	1	4117	tags=48%, list=30%, signal=69%
GO_REGULATION_OF_CELLULAR_KETONE_METABOLIC_PROCESS	118	0.10304	1.30292	0.147573	0.467316	1	6070	tags=54%, list=44%, signal=96%
GO_PROTEIN_PEPTIDYL_PROLYL_ISOMERIZATION	31	0.19605	1.30269	0.151456	0.467045	1	8868	tags=84%, list=64%, signal=234%
GO_INTESTINAL_ABSORPTION	17	0.263655	1.30222	0.180894	0.467121	1	5291	tags=65%, list=38%, signal=105%
GO_REGULATION_OF_MUSCLE_HYPERTROPHY	50	0.155469	1.30148	0.165067	0.467697	1	2000	tags=30%, list=15%, signal=35%
GO_METANEPHROS_MORPHOGENESIS	26	0.217469	1.30125	0.168986	0.467399	1	7614	tags=77%, list=55%, signal=171%
GO_POSITIVE_REGULATION_OF_RESPONSE_TO_DNA_DAMAGE_STIMULUS	84	0.123037	1.3012	0.153696	0.466794	1	2417	tags=30%, list=18%, signal=36%
GO_ACTIN_FILAMENT_ORGANIZATION	345	0.0607066	1.30009	0.142292	0.468094	1	3380	tags=30%, list=25%, signal=39%
GO_POSITIVE_REGULATION_OF_GTPASE_ACTIVITY	329	0.062422	1.299	0.164122	0.469351	1	7165	tags=58%, list=52%, signal=118%
GO_NEURON_PROJECTION_EXTENSION_INVOLVED_IN_NEURON_PROJECTION_GUIDANCE	36	0.179056	1.29607	0.147059	0.473885	1	6347	tags=64%, list=46%, signal=118%
GO_NEURAL_PRECURSOR_CELL_PROLIFERATION	132	0.0961421	1.29584	0.165029	0.473567	1	4641	tags=43%, list=34%, signal=64%
GO_CHAPERONE_COFACTOR_DEPENDENT_PROTEIN_REFOLDING	28	0.208102	1.2942	0.149225	0.475889	1	5508	tags=61%, list=40%, signal=101%
GO_NUCLEOSIDE_METABOLIC_PROCESS	46	0.159864	1.29417	0.152174	0.475238	1	6496	tags=63%, list=47%, signal=119%
GO_NEGATIVE_REGULATION_OF_STRIATED_MUSCLE_CELL_APOPTOTIC_PROCESS	18	0.250539	1.29143	0.170478	0.479613	1	8807	tags=89%, list=64%, signal=246%
GO_RECOMBINATIONAL_REPAIR	109	0.104895	1.28966	0.168959	0.48223	1	7800	tags=67%, list=57%, signal=153%
GO_REGULATION_OF_PROTEIN_POLYUBIQUITINATION	19	0.247707	1.28873	0.168085	0.483261	1	3846	tags=53%, list=28%, signal=73%
GO_POSITIVE_REGULATION_OF_MUSCLE_CELL_DIFFERENTIATION	69	0.131908	1.28833	0.147002	0.483313	1	1187	tags=22%, list=9%, signal=24%
GO_POSITIVE_REGULATION_OF_MRNA_PROCESSING	26	0.211143	1.28798	0.173228	0.483218	1	1336	tags=31%, list=10%, signal=34%
GO_NEURON_PROJECTION_ARBORIZATION	17	0.264941	1.28781	0.178988	0.482816	1	7707	tags=82%, list=56%, signal=186%
GO_NEUROMUSCULAR_JUNCTION_DEVELOPMENT	45	0.160546	1.28464	0.180915	0.487999	1	3615	tags=42%, list=26%, signal=57%
GO_SYNAPTIC_MEMBRANE_ADHESION	27	0.209669	1.28462	0.173469	0.487304	1	8861	tags=85%, list=64%, signal=238%
GO_MOLTING_CYCLE_PROCESS	70	0.131938	1.28461	0.154618	0.486595	1	2523	tags=31%, list=18%, signal=38%
GO_CYTOPLASMIC_MRNA_PROCESSING_BODY_ASSEMBLY	18	0.253721	1.28451	0.159136	0.486083	1	7997	tags=83%, list=58%, signal=198%
GO_NEGATIVE_REGULATION_OF_NUCLEOCYTOPLASMIC_TRANSPORT	19	0.246813	1.28439	0.173038	0.485589	1	5310	tags=63%, list=39%, signal=103%
GO_MYELOID_CELL_DIFFERENTIATION	306	0.0637607	1.28429	0.163265	0.48505	1	5584	tags=47%, list=40%, signal=77%
GO_REGULATION_OF_OSTEOBLAST_DIFFERENTIATION	98	0.111903	1.28413	0.182377	0.484609	1	2407	tags=29%, list=17%, signal=34%
GO_POSITIVE_REGULATION_OF_ALCOHOL_BIOSYNTHETIC_PROCESS	18	0.249619	1.28283	0.17495	0.486209	1	5755	tags=67%, list=42%, signal=114%
GO_POSITIVE_REGULATION_OF_CELL_PROJECTION_ORGANIZATION	339	0.061989	1.28195	0.177686	0.487238	1	2501	tags=24%, list=18%, signal=29%
GO_PRODUCTION_OF_SMALL_RNA_INVOLVED_IN_GENE_SILENCING_BY_RNA	48	0.157376	1.28185	0.167331	0.486716	1	5019	tags=52%, list=36%, signal=82%
GO_REGULATION_OF_AMPA_RECEPTOR_ACTIVITY	25	0.215054	1.2812	0.151899	0.487259	1	8623	tags=84%, list=63%, signal=224%
GO_RESPONSE_TO_TOPOLOGICALLY_INCORRECT_PROTEIN	178	0.0806916	1.28016	0.16	0.488461	1	5951	tags=51%, list=43%, signal=89%
GO_POSITIVE_REGULATION_OF_RELEASE_OF_SEQUESTERED_CALCIUM_ION_INTO_CYTOSOL	30	0.19726	1.27875	0.167019	0.490176	1	8777	tags=83%, list=64%, signal=229%
GO_REGULATION_OF_MITOTIC_SPINDLE_ASSEMBLY	20	0.237811	1.27855	0.167689	0.489872	1	9136	tags=90%, list=66%, signal=266%
GO_CELLULAR_RESPONSE_TO_LIPID	466	0.0519416	1.27827	0.162551	0.489634	1	6084	tags=49%, list=44%, signal=85%
GO_REGULATION_OF_DENDRITIC_SPINE_DEVELOPMENT	66	0.134079	1.27793	0.174442	0.489582	1	6308	tags=59%, list=46%, signal=108%
GO_CELLULAR_RESPONSE_TO_CHOLESTEROL	15	0.273592	1.27749	0.180039	0.48971	1	5424	tags=67%, list=39%, signal=110%
GO_NEURON_MATURATION	43	0.161508	1.27742	0.156904	0.489138	1	4193	tags=47%, list=30%, signal=67%
GO_TYPE_B_PANCREATIC_CELL_DEVELOPMENT	18	0.248276	1.27208	0.184265	0.498385	1	8072	tags=83%, list=59%, signal=201%
GO_TELOMERE_MAINTENANCE_VIA_TELOMERE_LENGTHENING	76	0.124398	1.27136	0.180556	0.498943	1	4644	tags=46%, list=34%, signal=69%
GO_NEURON_DEATH	298	0.0642998	1.27124	0.178571	0.498448	1	1723	tags=19%, list=12%, signal=21%
GO_REGULATION_OF_TRANSLATIONAL_INITIATION	70	0.129043	1.2705	0.162427	0.49911	1	6503	tags=60%, list=47%, signal=113%
GO_REGULATION_OF_MUSCLE_CELL_DIFFERENTIATION	123	0.0960798	1.27021	0.167665	0.498951	1	4404	tags=41%, list=32%, signal=60%
GO_HIPPO_SIGNALING	36	0.176754	1.26974	0.185111	0.499072	1	7911	tags=75%, list=57%, signal=175%
GO_CELLULAR_CARBOHYDRATE_BIOSYNTHETIC_PROCESS	72	0.129553	1.26805	0.170732	0.501557	1	4351	tags=44%, list=32%, signal=65%
GO_CYTOPLASMIC_SEQUESTERING_OF_PROTEIN	23	0.220581	1.26504	0.18664	0.50637	1	7755	tags=78%, list=56%, signal=179%
GO_VESICLE_ORGANIZATION	286	0.0640532	1.26163	0.185714	0.511985	1	9212	tags=73%, list=67%, signal=216%
GO_GOLGI_ORGANIZATION	118	0.100241	1.26093	0.206316	0.512556	1	7277	tags=63%, list=53%, signal=132%
GO_POSITIVE_REGULATION_OF_DNA_RECOMBINATION	32	0.186303	1.26089	0.169422	0.511892	1	6486	tags=66%, list=47%, signal=124%
GO_ANIMAL_ORGAN_MATURATION	19	0.244692	1.26067	0.184676	0.511523	1	1710	tags=37%, list=12%, signal=42%
GO_REGULATION_OF_MESONEPHROS_DEVELOPMENT	16	0.263185	1.26035	0.177291	0.51139	1	4993	tags=63%, list=36%, signal=98%
GO_PROTEIN_INSERTION_INTO_MITOCHONDRIAL_MEMBRANE_INVOLVED_IN_APOPTOTIC_SIGNALING_PATHWAY	29	0.193669	1.25988	0.163223	0.511562	1	4467	tags=52%, list=32%, signal=76%
GO_NEGATIVE_REGULATION_OF_CAMP_MEDIATED_SIGNALING	22	0.227243	1.25858	0.157588	0.513317	1	1885	tags=36%, list=14%, signal=42%
GO_METANEPHRIC_NEPHRON_EPITHELIUM_DEVELOPMENT	17	0.25013	1.25845	0.209581	0.512851	1	7911	tags=82%, list=57%, signal=193%
GO_POSITIVE_REGULATION_OF_TRANSCRIPTION_REGULATORY_REGION_DNA_BINDING	18	0.248917	1.2584	0.166667	0.512209	1	2700	tags=44%, list=20%, signal=55%
GO_MEIOTIC_CHROMOSOME_SEGREGATION	60	0.134277	1.25779	0.169388	0.512662	1	10797	tags=92%, list=78%, signal=420%
GO_REGULATION_OF_T_CELL_ACTIVATION	222	0.0707047	1.25683	0.183594	0.513789	1	7923	tags=64%, list=57%, signal=149%
GO_REFLEX	15	0.267523	1.25681	0.179435	0.513098	1	1830	tags=40%, list=13%, signal=46%
GO_REGULATION_OF_CIRCADIAN_RHYTHM	87	0.114185	1.25597	0.181818	0.513927	1	1129	tags=20%, list=8%, signal=21%
GO_MALE_GAMETE_GENERATION	352	0.0592585	1.255	0.200389	0.515044	1	7822	tags=63%, list=57%, signal=141%
GO_CELLULAR_RESPONSE_TO_ORGANIC_CYCLIC_COMPOUND	449	0.0512767	1.25415	0.202358	0.515908	1	5765	tags=47%, list=42%, signal=78%
GO_TRABECULA_FORMATION	21	0.228696	1.25414	0.193159	0.515194	1	3417	tags=48%, list=25%, signal=63%
GO_NEGATIVE_REGULATION_OF_MUSCLE_CELL_APOPTOTIC_PROCESS	28	0.19678	1.25405	0.198473	0.514638	1	1231	tags=29%, list=9%, signal=31%
GO_REGULATION_OF_ESTABLISHMENT_OF_PROTEIN_LOCALIZATION_TO_MITOCHONDRION	68	0.132022	1.25402	0.214433	0.513961	1	5894	tags=56%, list=43%, signal=97%
GO_PROTEIN_O_LINKED_GLYCOSYLATION	84	0.116536	1.25263	0.193182	0.515936	1	3327	tags=36%, list=24%, signal=47%
GO_REGULATION_OF_DNA_DAMAGE_RESPONSE_SIGNAL_TRANSDUCTION_BY_P53_CLASS_MEDIATOR	28	0.20006	1.25199	0.223577	0.516439	1	3156	tags=43%, list=23%, signal=55%
GO_ESTABLISHMENT_OF_PROTEIN_LOCALIZATION_TO_VACUOLE	44	0.156823	1.25156	0.195695	0.516574	1	10067	tags=89%, list=73%, signal=327%
GO_ENDOTHELIAL_CELL_MIGRATION	178	0.081262	1.25146	0.188841	0.515999	1	3309	tags=32%, list=24%, signal=42%
GO_REGULATION_OF_CELLULAR_AMIDE_METABOLIC_PROCESS	351	0.0587886	1.24961	0.205821	0.518783	1	11664	tags=90%, list=85%, signal=571%
GO_ECTODERM_DEVELOPMENT	16	0.262768	1.24945	0.206383	0.518374	1	1551	tags=38%, list=11%, signal=42%
GO_MITOTIC_NUCLEAR_DIVISION	250	0.0683834	1.24892	0.220077	0.518644	1	9830	tags=78%, list=71%, signal=267%
GO_NEGATIVE_REGULATION_OF_CELLULAR_SENESCENCE	17	0.247888	1.24825	0.189555	0.519168	1	1452	tags=35%, list=11%, signal=39%
GO_REGULATION_OF_PROTEIN_MATURATION	44	0.158659	1.2482	0.186296	0.518575	1	6594	tags=64%, list=48%, signal=122%
GO_REGULATION_OF_INTRINSIC_APOPTOTIC_SIGNALING_PATHWAY_IN_RESPONSE_TO_DNA_DAMAGE	37	0.171417	1.24807	0.199211	0.51811	1	3605	tags=43%, list=26%, signal=58%
GO_ARTERY_MORPHOGENESIS	51	0.150141	1.2475	0.207661	0.518527	1	5778	tags=57%, list=42%, signal=98%
GO_POSITIVE_REGULATION_OF_PLASMA_MEMBRANE_BOUNDED_CELL_PROJECTION_ASSEMBLY	89	0.1092	1.24731	0.192547	0.518167	1	7955	tags=69%, list=58%, signal=161%
GO_REGULATION_OF_DOUBLE_STRAND_BREAK_REPAIR_VIA_NONHOMOLOGOUS_END_JOINING	15	0.262979	1.24711	0.19186	0.517823	1	7409	tags=80%, list=54%, signal=173%
GO_PHOSPHOLIPASE_C_ACTIVATING_G_PROTEIN_COUPLED_RECEPTOR_SIGNALING_PATHWAY	72	0.126443	1.24614	0.170213	0.518982	1	1329	tags=22%, list=10%, signal=24%
GO_REGULATION_OF_CYTOPLASMIC_TRANSLATION	26	0.198871	1.24566	0.208577	0.519228	1	7870	tags=77%, list=57%, signal=179%
GO_CELL_DIFFERENTIATION_INVOLVED_IN_EMBRYONIC_PLACENTA_DEVELOPMENT	16	0.254814	1.24363	0.200397	0.522312	1	9418	tags=94%, list=68%, signal=295%
GO_DNA_REPLICATION_INITIATION	35	0.174725	1.2435	0.206478	0.521831	1	4688	tags=51%, list=34%, signal=78%
GO_VENTRICULAR_SYSTEM_DEVELOPMENT	25	0.209525	1.24349	0.198364	0.521135	1	4286	tags=52%, list=31%, signal=75%
GO_NEGATIVE_REGULATION_OF_DNA_REPAIR	22	0.223585	1.24309	0.206831	0.521149	1	8204	tags=82%, list=59%, signal=202%
GO_SENSORY_ORGAN_MORPHOGENESIS	199	0.0769134	1.24269	0.188235	0.521154	1	3874	tags=36%, list=28%, signal=49%
GO_BEHAVIOR	491	0.049067	1.24206	0.207317	0.521581	1	498	tags=8%, list=4%, signal=8%
GO_REGULATION_OF_GTPASE_ACTIVITY	397	0.0537206	1.24186	0.193159	0.521269	1	7165	tags=57%, list=52%, signal=116%
GO_REGULATION_OF_DNA_REPAIR	102	0.103815	1.24107	0.208494	0.522127	1	10476	tags=86%, list=76%, signal=356%
GO_REGULATION_OF_DNA_BINDING_TRANSCRIPTION_FACTOR_ACTIVITY	343	0.0576082	1.24078	0.198795	0.522004	1	9075	tags=71%, list=66%, signal=204%
GO_RAB_PROTEIN_SIGNAL_TRANSDUCTION	61	0.134063	1.24065	0.204678	0.521512	1	8332	tags=74%, list=60%, signal=186%
GO_ADENYLATE_CYCLASE_ACTIVATING_G_PROTEIN_COUPLED_RECEPTOR_SIGNALING_PATHWAY	93	0.111568	1.23972	0.203522	0.522624	1	2178	tags=27%, list=16%, signal=32%
GO_REGULATION_OF_SMOOTH_MUSCLE_CELL_DIFFERENTIATION	31	0.186487	1.23862	0.184762	0.524084	1	4106	tags=48%, list=30%, signal=69%
GO_NEGATIVE_REGULATION_OF_TELOMERE_MAINTENANCE	32	0.185002	1.23822	0.193227	0.524052	1	5211	tags=56%, list=38%, signal=90%
GO_EXTRINSIC_APOPTOTIC_SIGNALING_PATHWAY_VIA_DEATH_DOMAIN_RECEPTORS	71	0.126668	1.23693	0.20396	0.525917	1	9527	tags=82%, list=69%, signal=263%
GO_REGULATION_OF_SISTER_CHROMATID_COHESION	19	0.236288	1.23543	0.192771	0.528135	1	9810	tags=95%, list=71%, signal=328%
GO_CORONARY_VASCULATURE_DEVELOPMENT	39	0.167053	1.23391	0.193294	0.530452	1	4774	tags=51%, list=35%, signal=78%
GO_POSITIVE_REGULATION_OF_ESTABLISHMENT_OF_PROTEIN_LOCALIZATION_TO_MITOCHONDRION	55	0.138967	1.23327	0.1917	0.53101	1	6114	tags=58%, list=44%, signal=104%
GO_POSITIVE_REGULATION_OF_COLLAGEN_BIOSYNTHETIC_PROCESS	17	0.240333	1.23297	0.219758	0.530917	1	4801	tags=59%, list=35%, signal=90%
GO_ENDOPLASMIC_RETICULUM_MANNOSE_TRIMMING	15	0.266638	1.23168	0.220729	0.532583	1	3681	tags=53%, list=27%, signal=73%
GO_CEREBRAL_CORTEX_CELL_MIGRATION	41	0.161345	1.23027	0.219608	0.534602	1	2826	tags=37%, list=20%, signal=46%
GO_POSITIVE_REGULATION_OF_T_CELL_PROLIFERATION	61	0.131187	1.22981	0.226069	0.534727	1	7015	tags=64%, list=51%, signal=130%
GO_REGULATION_OF_SIGNALING_RECEPTOR_ACTIVITY	322	0.0578796	1.22938	0.194389	0.534821	1	1832	tags=19%, list=13%, signal=21%
GO_POSITIVE_REGULATION_OF_CELL_CYCLE_PROCESS	238	0.0702905	1.22898	0.212181	0.534851	1	4725	tags=41%, list=34%, signal=62%
GO_ESTABLISHMENT_OF_CELL_POLARITY	123	0.0943114	1.22802	0.213725	0.536088	1	6110	tags=54%, list=44%, signal=95%
GO_NEGATIVE_REGULATION_OF_NEURON_DIFFERENTIATION	202	0.0741427	1.22754	0.190855	0.536297	1	2132	tags=23%, list=15%, signal=27%
GO_PEPTIDYL_SERINE_MODIFICATION	260	0.0640805	1.22737	0.19596	0.535858	1	1731	tags=19%, list=13%, signal=21%
GO_CHROMATIN_DISASSEMBLY	17	0.245129	1.22585	0.215238	0.538008	1	1490	tags=35%, list=11%, signal=40%
GO_REGULATION_OF_STEROID_BIOSYNTHETIC_PROCESS	71	0.124159	1.22574	0.203219	0.537501	1	3540	tags=38%, list=26%, signal=51%
GO_CELLULAR_COMPONENT_DISASSEMBLY_INVOLVED_IN_EXECUTION_PHASE_OF_APOPTOSIS	31	0.190163	1.22476	0.235887	0.538701	1	8949	tags=84%, list=65%, signal=238%
GO_DEOXYRIBONUCLEOTIDE_BIOSYNTHETIC_PROCESS	15	0.262224	1.22454	0.227704	0.538424	1	6500	tags=73%, list=47%, signal=139%
GO_ROOF_OF_MOUTH_DEVELOPMENT	75	0.123552	1.22449	0.23506	0.537798	1	8050	tags=71%, list=58%, signal=169%
GO_RESPONSE_TO_STEROL	25	0.207003	1.22407	0.222222	0.537888	1	5424	tags=60%, list=39%, signal=99%
GO_HISTONE_H2A_MONOUBIQUITINATION	16	0.253811	1.22404	0.206827	0.537225	1	6846	tags=75%, list=50%, signal=149%
GO_PROTEIN_TARGETING_TO_VACUOLE	33	0.179479	1.22384	0.202505	0.536899	1	10067	tags=91%, list=73%, signal=336%
GO_TRANSFORMING_GROWTH_FACTOR_BETA_PRODUCTION	27	0.195986	1.22349	0.23251	0.536915	1	2920	tags=41%, list=21%, signal=52%
GO_CELLULAR_EXTRAVASATION	42	0.160843	1.22274	0.212644	0.537633	1	8295	tags=76%, list=60%, signal=191%
GO_NEGATIVE_REGULATION_OF_TOLL_LIKE_RECEPTOR_SIGNALING_PATHWAY	32	0.178585	1.222	0.194389	0.538409	1	9178	tags=84%, list=67%, signal=252%
GO_ATP_DEPENDENT_CHROMATIN_REMODELING	61	0.129459	1.22175	0.202532	0.53818	1	2291	tags=30%, list=17%, signal=35%
GO_REGULATION_OF_MONONUCLEAR_CELL_MIGRATION	32	0.185142	1.22042	0.225743	0.539972	1	6071	tags=63%, list=44%, signal=111%
GO_PRESYNAPTIC_ENDOCYTOSIS	51	0.145453	1.22012	0.207921	0.539816	1	10169	tags=88%, list=74%, signal=335%
GO_NEGATIVE_REGULATION_OF_MITOTIC_CELL_CYCLE	282	0.0637738	1.21964	0.199179	0.540045	1	8576	tags=68%, list=62%, signal=177%
GO_SERTOLI_CELL_DIFFERENTIATION	17	0.242332	1.21807	0.220374	0.542421	1	3151	tags=47%, list=23%, signal=61%
GO_SECOND_MESSENGER_MEDIATED_SIGNALING	320	0.0589922	1.21765	0.224101	0.54251	1	2178	tags=22%, list=16%, signal=25%
GO_NEURAL_CREST_CELL_DIFFERENTIATION	77	0.119535	1.21742	0.228628	0.542235	1	7494	tags=66%, list=54%, signal=144%
GO_NEGATIVE_REGULATION_OF_MUSCLE_HYPERTROPHY	22	0.218924	1.21712	0.228395	0.542126	1	4507	tags=55%, list=33%, signal=81%
GO_NEGATIVE_REGULATION_OF_PEPTIDYL_SERINE_PHOSPHORYLATION	24	0.208833	1.2168	0.212598	0.54206	1	1721	tags=33%, list=12%, signal=38%
GO_POSITIVE_REGULATION_OF_PROTEIN_BINDING	83	0.11223	1.21546	0.231237	0.543934	1	2116	tags=27%, list=15%, signal=31%
GO_POSITIVE_REGULATION_OF_DEFENSE_RESPONSE	351	0.0565718	1.21453	0.226415	0.545107	1	8747	tags=69%, list=63%, signal=184%
GO_MITOCHONDRION_LOCALIZATION	39	0.166432	1.21434	0.214286	0.544758	1	10794	tags=95%, list=78%, signal=435%
GO_REGULATION_OF_SMALL_MOLECULE_METABOLIC_PROCESS	278	0.0632804	1.21358	0.209446	0.545581	1	6089	tags=50%, list=44%, signal=88%
GO_REGULATION_OF_RECEPTOR_SIGNALING_PATHWAY_VIA_STAT	81	0.113226	1.21236	0.214567	0.547186	1	4576	tags=44%, list=33%, signal=66%
GO_REGULATION_OF_TRANSCRIPTION_BY_RNA_POLYMERASE_I	27	0.19279	1.20897	0.219262	0.553023	1	7561	tags=74%, list=55%, signal=164%
GO_ORGANIC_HYDROXY_COMPOUND_TRANSPORT	169	0.0821509	1.20888	0.215812	0.552516	1	4837	tags=43%, list=35%, signal=66%
GO_CARDIAC_MUSCLE_CONTRACTION	111	0.098218	1.20837	0.216867	0.552765	1	1016	tags=17%, list=7%, signal=18%
GO_PALLIUM_DEVELOPMENT	152	0.0860839	1.20771	0.225049	0.553306	1	1819	tags=22%, list=13%, signal=25%
GO_CYCLIC_NUCLEOTIDE_MEDIATED_SIGNALING	155	0.0816255	1.20734	0.220202	0.553255	1	2178	tags=24%, list=16%, signal=28%
GO_SKIN_DEVELOPMENT	186	0.0775225	1.2069	0.216495	0.553428	1	2874	tags=28%, list=21%, signal=36%
GO_POSITIVE_REGULATION_OF_LEUKOCYTE_MIGRATION	84	0.111948	1.20526	0.209615	0.55594	1	7166	tags=63%, list=52%, signal=131%
GO_POSITIVE_REGULATION_OF_CELL_CYCLE_G2_M_PHASE_TRANSITION	28	0.192805	1.20439	0.231225	0.556875	1	5226	tags=57%, list=38%, signal=92%
GO_PROTEIN_K48_LINKED_DEUBIQUITINATION	28	0.192558	1.20423	0.244318	0.556501	1	6707	tags=68%, list=49%, signal=132%
GO_POSITIVE_REGULATION_OF_HEMOPOIESIS	144	0.0857591	1.20257	0.234216	0.559195	1	6203	tags=53%, list=45%, signal=96%
GO_CRANIAL_NERVE_MORPHOGENESIS	16	0.248108	1.20132	0.224568	0.560945	1	891	tags=31%, list=6%, signal=33%
GO_HOMEOSTASIS_OF_NUMBER_OF_CELLS	198	0.0747755	1.20081	0.232932	0.561277	1	4694	tags=41%, list=34%, signal=62%
GO_G1_DNA_DAMAGE_CHECKPOINT	62	0.129782	1.19986	0.229572	0.562521	1	9339	tags=81%, list=68%, signal=249%
GO_EYE_PHOTORECEPTOR_CELL_DIFFERENTIATION	34	0.171607	1.19957	0.226415	0.562363	1	2100	tags=32%, list=15%, signal=38%
GO_CELLULAR_RESPONSE_TO_AMMONIUM_ION	58	0.134216	1.19927	0.2334	0.562278	1	2198	tags=29%, list=16%, signal=35%
GO_CIRCADIAN_REGULATION_OF_GENE_EXPRESSION	51	0.143857	1.1992	0.223553	0.561702	1	2349	tags=31%, list=17%, signal=38%
GO_ERYTHROCYTE_DEVELOPMENT	22	0.211972	1.19919	0.237548	0.561014	1	3349	tags=45%, list=24%, signal=60%
GO_STRIATED_MUSCLE_CELL_DIFFERENTIATION	208	0.070763	1.1982	0.221992	0.562218	1	3016	tags=29%, list=22%, signal=36%
GO_ESTABLISHMENT_OF_PLANAR_POLARITY_INVOLVED_IN_NEURAL_TUBE_CLOSURE	15	0.258493	1.19741	0.230461	0.56306	1	5632	tags=67%, list=41%, signal=113%
GO_REGULATION_OF_FILOPODIUM_ASSEMBLY	38	0.16132	1.19605	0.243952	0.56502	1	8668	tags=79%, list=63%, signal=212%
GO_TRANSPORT_OF_VIRUS	53	0.138274	1.19563	0.217131	0.565179	1	5125	tags=51%, list=37%, signal=81%
GO_MOTOR_NEURON_AXON_GUIDANCE	19	0.228068	1.19481	0.199195	0.566129	1	6294	tags=68%, list=46%, signal=126%
GO_CELL_CYCLE_CHECKPOINT	199	0.0725874	1.19439	0.223301	0.56631	1	8576	tags=69%, list=62%, signal=181%
GO_EMBRYO_DEVELOPMENT_ENDING_IN_BIRTH_OR_EGG_HATCHING	494	0.0467639	1.19353	0.229839	0.567268	1	5156	tags=42%, list=37%, signal=65%
GO_EMBRYONIC_HEMOPOIESIS	18	0.236441	1.1934	0.238748	0.566854	1	3638	tags=50%, list=26%, signal=68%
GO_CHAPERONE_MEDIATED_PROTEIN_FOLDING	54	0.138114	1.19207	0.255533	0.568762	1	5508	tags=54%, list=40%, signal=89%
GO_REGULATION_OF_SYNAPTIC_VESICLE_RECYCLING	26	0.198435	1.19182	0.239583	0.568604	1	7876	tags=77%, list=57%, signal=179%
GO_POSITIVE_REGULATION_OF_NEURON_DEATH	80	0.113506	1.19161	0.221766	0.568349	1	5683	tags=52%, list=41%, signal=89%
GO_CALCIUM_ION_TRANSMEMBRANE_TRANSPORT	256	0.0657254	1.19132	0.229412	0.568191	1	4712	tags=41%, list=34%, signal=61%
GO_ADHERENS_JUNCTION_ORGANIZATION	132	0.0886828	1.18991	0.228346	0.570236	1	1922	tags=23%, list=14%, signal=26%
GO_IMMUNOGLOBULIN_PRODUCTION_INVOLVED_IN_IMMUNOGLOBULIN_MEDIATED_IMMUNE_RESPONSE	36	0.166012	1.18942	0.228571	0.570493	1	4611	tags=50%, list=33%, signal=75%
GO_EPITHELIAL_CELL_PROLIFERATION	299	0.0597555	1.18886	0.243295	0.570938	1	4866	tags=41%, list=35%, signal=62%
GO_RETINOIC_ACID_RECEPTOR_SIGNALING_PATHWAY	26	0.196736	1.18848	0.239919	0.571008	1	3656	tags=46%, list=27%, signal=63%
GO_REGULATION_OF_RHODOPSIN_MEDIATED_SIGNALING_PATHWAY	16	0.247042	1.18847	0.260437	0.570314	1	10387	tags=100%, list=75%, signal=405%
GO_REGULATION_OF_EPITHELIAL_TUBE_FORMATION	15	0.258493	1.18846	0.257796	0.569642	1	5632	tags=67%, list=41%, signal=113%
GO_NEGATIVE_REGULATION_OF_BLOOD_VESSEL_ENDOTHELIAL_CELL_MIGRATION	28	0.187472	1.18818	0.221757	0.569502	1	6777	tags=68%, list=49%, signal=133%
GO_REGULATION_OF_ACTION_POTENTIAL	43	0.155035	1.18795	0.225621	0.569299	1	4282	tags=47%, list=31%, signal=67%
GO_POSITIVE_REGULATION_OF_FIBROBLAST_PROLIFERATION	45	0.148208	1.18792	0.245714	0.56866	1	4704	tags=49%, list=34%, signal=74%
GO_IMMUNE_RESPONSE_REGULATING_SIGNALING_PATHWAY	420	0.0505225	1.18582	0.231707	0.572087	1	9010	tags=70%, list=65%, signal=196%
GO_REGULATION_OF_NUCLEOBASE_CONTAINING_COMPOUND_TRANSPORT	16	0.247237	1.18547	0.239437	0.572119	1	903	tags=31%, list=7%, signal=33%
GO_HISTONE_H3_K9_TRIMETHYLATION	15	0.256344	1.18477	0.249042	0.57287	1	1984	tags=40%, list=14%, signal=47%
GO_CELLULAR_RESPONSE_TO_ESTRADIOL_STIMULUS	25	0.201746	1.18462	0.256673	0.572486	1	6048	tags=64%, list=44%, signal=114%
GO_REGULATION_OF_ADHERENS_JUNCTION_ORGANIZATION	66	0.124378	1.18431	0.244533	0.572429	1	2471	tags=30%, list=18%, signal=37%
GO_REGULATION_OF_EXTRINSIC_APOPTOTIC_SIGNALING_PATHWAY	134	0.0873162	1.18343	0.253112	0.573468	1	10745	tags=87%, list=78%, signal=388%
GO_POSITIVE_REGULATION_OF_MESENCHYMAL_CELL_PROLIFERATION	23	0.208379	1.18287	0.261224	0.573779	1	7923	tags=78%, list=57%, signal=184%
GO_DNA_TEMPLATED_TRANSCRIPTION_ELONGATION	105	0.101783	1.18225	0.250996	0.574378	1	7800	tags=67%, list=57%, signal=152%
GO_PROSTANOID_BIOSYNTHETIC_PROCESS	19	0.226944	1.18213	0.240631	0.573925	1	8487	tags=84%, list=62%, signal=219%
GO_ANOIKIS	29	0.183261	1.18082	0.234694	0.57578	1	6988	tags=69%, list=51%, signal=140%
GO_MOVEMENT_IN_ENVIRONMENT_OF_OTHER_ORGANISM_INVOLVED_IN_SYMBIOTIC_INTERACTION	33	0.175019	1.1808	0.245136	0.575137	1	7203	tags=70%, list=52%, signal=146%
GO_SEMI_LUNAR_VALVE_DEVELOPMENT	32	0.17591	1.18074	0.250501	0.574554	1	6629	tags=66%, list=48%, signal=126%
GO_MITOTIC_CELL_CYCLE_CHECKPOINT	153	0.0810639	1.17797	0.256	0.579289	1	8448	tags=69%, list=61%, signal=177%
GO_POSITIVE_REGULATION_OF_INTERFERON_ALPHA_PRODUCTION	19	0.225824	1.17786	0.263052	0.578816	1	1244	tags=32%, list=9%, signal=35%
GO_FEAR_RESPONSE	36	0.166546	1.17583	0.237903	0.582224	1	1539	tags=28%, list=11%, signal=31%
GO_NUCLEAR_TRANSCRIBED_MRNA_CATABOLIC_PROCESS	191	0.0731645	1.17555	0.233792	0.582093	1	9979	tags=80%, list=72%, signal=284%
GO_PEPTIDYL_LYSINE_TRIMETHYLATION	37	0.162156	1.17494	0.247619	0.582549	1	1496	tags=27%, list=11%, signal=30%
GO_NEGATIVE_REGULATION_OF_DNA_BINDING_TRANSCRIPTION_FACTOR_ACTIVITY	127	0.0902786	1.17445	0.253704	0.582863	1	6041	tags=53%, list=44%, signal=93%
GO_MAMMARY_GLAND_EPITHELIAL_CELL_PROLIFERATION	22	0.21046	1.17428	0.244141	0.582473	1	7131	tags=73%, list=52%, signal=150%
GO_MONONUCLEAR_CELL_DIFFERENTIATION	29	0.184739	1.17338	0.258964	0.583648	1	5541	tags=59%, list=40%, signal=98%
GO_NEGATIVE_REGULATION_OF_OXIDATIVE_STRESS_INDUCED_NEURON_DEATH	16	0.244251	1.17239	0.254065	0.58491	1	2668	tags=44%, list=19%, signal=54%
GO_REGULATION_OF_RESPONSE_TO_DRUG	71	0.119032	1.17206	0.256048	0.584893	1	891	tags=18%, list=6%, signal=19%
GO_MATURATION_OF_5_8S_RRNA	27	0.193419	1.17204	0.271047	0.584235	1	10617	tags=96%, list=77%, signal=418%
GO_REGULATION_OF_PROTEIN_LOCALIZATION_TO_PLASMA_MEMBRANE	81	0.111157	1.17118	0.254	0.585296	1	2391	tags=28%, list=17%, signal=34%
GO_POSITIVE_REGULATION_OF_MYELOID_CELL_DIFFERENTIATION	68	0.1209	1.17045	0.235514	0.586059	1	5641	tags=53%, list=41%, signal=89%
GO_REGULATION_OF_INTRACELLULAR_TRANSPORT	389	0.0525354	1.16973	0.2607	0.586802	1	4081	tags=35%, list=30%, signal=48%
GO_NUCLEAR_DNA_REPLICATION	51	0.140457	1.16906	0.252016	0.587465	1	9156	tags=80%, list=66%, signal=238%
GO_PROTEIN_STABILIZATION	153	0.0820286	1.16841	0.246914	0.588046	1	5911	tags=51%, list=43%, signal=88%
GO_REGULATION_OF_ER_TO_GOLGI_VESICLE_MEDIATED_TRANSPORT	16	0.240976	1.16839	0.247444	0.587397	1	4437	tags=56%, list=32%, signal=83%
GO_SMOOTH_MUSCLE_TISSUE_DEVELOPMENT	17	0.240333	1.16826	0.268431	0.586994	1	4801	tags=59%, list=35%, signal=90%
GO_SMOOTHENED_SIGNALING_PATHWAY	119	0.0943571	1.16823	0.267578	0.586329	1	1838	tags=23%, list=13%, signal=26%
GO_REGULATION_OF_T_CELL_APOPTOTIC_PROCESS	23	0.198545	1.16786	0.265748	0.58641	1	8658	tags=83%, list=63%, signal=222%
GO_CELL_CYCLE_DNA_REPLICATION	61	0.123448	1.16771	0.246988	0.586017	1	9156	tags=79%, list=66%, signal=233%
GO_ENDOCRINE_PANCREAS_DEVELOPMENT	33	0.172607	1.16688	0.268627	0.586933	1	8072	tags=76%, list=59%, signal=182%
GO_MEMBRANE_PROTEIN_PROTEOLYSIS	51	0.137345	1.16644	0.267606	0.587115	1	5413	tags=53%, list=39%, signal=87%
GO_PEPTIDYL_TYROSINE_AUTOPHOSPHORYLATION	30	0.178236	1.16643	0.247951	0.586452	1	2603	tags=37%, list=19%, signal=45%
GO_DNA_INTEGRITY_CHECKPOINT	146	0.0823494	1.16628	0.245935	0.586082	1	11155	tags=89%, list=81%, signal=461%
GO_REGULATION_OF_CARDIAC_MUSCLE_CELL_DIFFERENTIATION	31	0.17704	1.166	0.264706	0.58593	1	4236	tags=48%, list=31%, signal=70%
GO_CENTRAL_NERVOUS_SYSTEM_NEURON_DIFFERENTIATION	146	0.0833593	1.16493	0.269084	0.587464	1	2451	tags=26%, list=18%, signal=31%
GO_INNERVATION	25	0.197228	1.16487	0.27	0.586882	1	3352	tags=44%, list=24%, signal=58%
GO_DENDRITE_MORPHOGENESIS	134	0.0869239	1.1646	0.252964	0.586731	1	8692	tags=72%, list=63%, signal=192%
GO_PHOTORECEPTOR_CELL_DIFFERENTIATION	48	0.139808	1.16456	0.27112	0.586135	1	2100	tags=29%, list=15%, signal=34%
GO_DEVELOPMENTAL_PIGMENTATION	37	0.162989	1.16406	0.279843	0.586463	1	2230	tags=32%, list=16%, signal=39%
GO_MONONUCLEAR_CELL_MIGRATION	48	0.143546	1.16388	0.253493	0.586126	1	6071	tags=58%, list=44%, signal=104%
GO_RESPONSE_TO_MOLECULE_OF_BACTERIAL_ORIGIN	235	0.0643602	1.16325	0.265896	0.586756	1	9103	tags=72%, list=66%, signal=209%
GO_GASTRULATION	135	0.085867	1.16257	0.271429	0.587422	1	7101	tags=60%, list=51%, signal=122%
GO_METHYLATION_DEPENDENT_CHROMATIN_SILENCING	16	0.236393	1.16152	0.264463	0.588896	1	6224	tags=69%, list=45%, signal=125%
GO_DNA_TEMPLATED_TRANSCRIPTION_TERMINATION	70	0.12054	1.15999	0.268859	0.591287	1	11151	tags=93%, list=81%, signal=483%
GO_BLASTOCYST_FORMATION	28	0.183242	1.15895	0.242798	0.592676	1	3880	tags=46%, list=28%, signal=64%
GO_COPII_COATED_VESICLE_BUDDING	67	0.119929	1.15883	0.24558	0.592233	1	4734	tags=46%, list=34%, signal=70%
GO_PROTEIN_LOCALIZATION_TO_GOLGI_APPARATUS	25	0.191675	1.1588	0.248544	0.59161	1	5635	tags=60%, list=41%, signal=101%
GO_NEGATIVE_REGULATION_OF_BINDING	133	0.0865058	1.1586	0.275789	0.591342	1	6387	tags=55%, list=46%, signal=101%
GO_INTERFERON_BETA_PRODUCTION	46	0.143673	1.15816	0.258264	0.591544	1	10616	tags=91%, list=77%, signal=395%
GO_POSITIVE_REGULATION_BY_HOST_OF_VIRAL_TRANSCRIPTION	17	0.230421	1.15788	0.270325	0.591437	1	6560	tags=71%, list=48%, signal=134%
GO_TRANSLATIONAL_INITIATION	178	0.0745326	1.15769	0.266667	0.591146	1	12388	tags=97%, list=90%, signal=943%
GO_POSITIVE_REGULATION_OF_DEFENSE_RESPONSE_TO_VIRUS_BY_HOST	17	0.231237	1.15608	0.287425	0.593705	1	7360	tags=76%, list=53%, signal=164%
GO_REGENERATION	154	0.0800872	1.15558	0.262548	0.594044	1	3474	tags=33%, list=25%, signal=44%
GO_AGING	261	0.0625889	1.15555	0.275665	0.593424	1	2164	tags=22%, list=16%, signal=25%
GO_DNA_STRAND_ELONGATION	21	0.215064	1.1552	0.292	0.593463	1	2948	tags=43%, list=21%, signal=54%
GO_REGULATION_OF_CELL_MATRIX_ADHESION	100	0.0990782	1.15348	0.288382	0.596216	1	2504	tags=28%, list=18%, signal=34%
GO_POSITIVE_REGULATION_OF_TELOMERE_MAINTENANCE_VIA_TELOMERE_LENGTHENING	37	0.155719	1.15343	0.246183	0.595649	1	2330	tags=32%, list=17%, signal=39%
GO_RESPONSE_TO_INTERLEUKIN_7	25	0.191187	1.15085	0.275	0.600163	1	6745	tags=68%, list=49%, signal=133%
GO_POSITIVE_REGULATION_OF_CELLULAR_RESPONSE_TO_TRANSFORMING_GROWTH_FACTOR_BETA_STIMULUS	27	0.186251	1.14947	0.25641	0.602311	1	7651	tags=74%, list=55%, signal=166%
GO_MUSCLE_CELL_DEVELOPMENT	137	0.083414	1.14866	0.276515	0.603235	1	1578	tags=20%, list=11%, signal=22%
GO_CELLULAR_RESPONSE_TO_HEAT	118	0.0906959	1.14803	0.292276	0.603803	1	7875	tags=66%, list=57%, signal=153%
GO_LEUKOCYTE_CHEMOTAXIS	127	0.089424	1.14797	0.288136	0.603216	1	4641	tags=43%, list=34%, signal=63%
GO_THYMUS_DEVELOPMENT	34	0.163399	1.14741	0.275728	0.603713	1	4241	tags=47%, list=31%, signal=68%
GO_RNA_METHYLATION	70	0.120929	1.14727	0.294466	0.603292	1	2083	tags=27%, list=15%, signal=32%
GO_CYTOSOLIC_CALCIUM_ION_TRANSPORT	137	0.0840918	1.14702	0.261044	0.603117	1	4790	tags=43%, list=35%, signal=65%
GO_REGULATION_OF_RESPIRATORY_GASEOUS_EXCHANGE	18	0.225078	1.14685	0.267932	0.602768	1	1496	tags=33%, list=11%, signal=37%
GO_SPECIFICATION_OF_SYMMETRY	95	0.0989548	1.14675	0.280632	0.602299	1	8370	tags=71%, list=61%, signal=178%
GO_REGULATION_OF_MACROPHAGE_MIGRATION	24	0.193533	1.14613	0.277666	0.602808	1	5954	tags=63%, list=43%, signal=110%
GO_TRACHEA_DEVELOPMENT	18	0.224328	1.14561	0.253112	0.603122	1	9168	tags=89%, list=66%, signal=265%
GO_ATRIAL_CARDIAC_MUSCLE_CELL_TO_AV_NODE_CELL_SIGNALING	19	0.217077	1.14535	0.286573	0.602969	1	3542	tags=47%, list=26%, signal=64%
GO_NCRNA_CATABOLIC_PROCESS	23	0.196205	1.14486	0.2881	0.603265	1	7491	tags=74%, list=54%, signal=162%
GO_POSITIVE_REGULATION_OF_CANONICAL_WNT_SIGNALING_PATHWAY	133	0.0840484	1.14407	0.291165	0.604193	1	10983	tags=88%, list=80%, signal=428%
GO_REGULATION_OF_VOLTAGE_GATED_CALCIUM_CHANNEL_ACTIVITY	31	0.172199	1.14382	0.297244	0.604	1	2968	tags=39%, list=22%, signal=49%
GO_AXIS_ELONGATION	25	0.191893	1.1436	0.270677	0.603756	1	5632	tags=60%, list=41%, signal=101%
GO_POSITIVE_REGULATION_OF_INTRACELLULAR_TRANSPORT	190	0.0725431	1.14346	0.280164	0.603391	1	5182	tags=45%, list=38%, signal=71%
GO_LIMBIC_SYSTEM_DEVELOPMENT	96	0.0979806	1.14227	0.288499	0.605065	1	812	tags=16%, list=6%, signal=16%
GO_VESICLE_TARGETING_TO_FROM_OR_WITHIN_GOLGI	70	0.114384	1.14134	0.266795	0.60628	1	4734	tags=46%, list=34%, signal=69%
GO_L_GLUTAMATE_TRANSMEMBRANE_TRANSPORT	21	0.203652	1.14111	0.271984	0.60607	1	1135	tags=29%, list=8%, signal=31%
GO_REGULATION_OF_LEUKOCYTE_APOPTOTIC_PROCESS	62	0.124321	1.14102	0.293886	0.605556	1	5855	tags=55%, list=42%, signal=95%
GO_RECEPTOR_SIGNALING_PATHWAY_VIA_STAT	98	0.0977253	1.14087	0.298279	0.605159	1	4712	tags=44%, list=34%, signal=66%
GO_ANATOMICAL_STRUCTURE_HOMEOSTASIS	334	0.0537085	1.13883	0.272727	0.608635	1	4644	tags=39%, list=34%, signal=57%
GO_RETROGRADE_TRANSPORT_ENDOSOME_TO_PLASMA_MEMBRANE	23	0.195169	1.13816	0.266094	0.609312	1	3308	tags=43%, list=24%, signal=57%
GO_KERATAN_SULFATE_BIOSYNTHETIC_PROCESS	26	0.18613	1.13815	0.305085	0.608671	1	3802	tags=46%, list=28%, signal=64%
GO_HETEROPHILIC_CELL_CELL_ADHESION_VIA_PLASMA_MEMBRANE_CELL_ADHESION_MOLECULES	35	0.156061	1.1378	0.280702	0.608668	1	8491	tags=77%, list=62%, signal=200%
GO_EMBRYONIC_FORELIMB_MORPHOGENESIS	24	0.193879	1.13711	0.281124	0.609362	1	4800	tags=54%, list=35%, signal=83%
GO_MUSCLE_CELL_DIFFERENTIATION	279	0.0601353	1.13672	0.287169	0.609473	1	3042	tags=28%, list=22%, signal=35%
GO_NLS_BEARING_PROTEIN_IMPORT_INTO_NUCLEUS	15	0.243931	1.13652	0.316092	0.60923	1	2155	tags=40%, list=16%, signal=47%
GO_ADRENERGIC_RECEPTOR_SIGNALING_PATHWAY	22	0.205963	1.1364	0.278455	0.608795	1	2178	tags=36%, list=16%, signal=43%
GO_OVULATION	18	0.225308	1.13624	0.274059	0.608415	1	2259	tags=39%, list=16%, signal=46%
GO_MYELOID_CELL_DEVELOPMENT	52	0.129736	1.13517	0.271084	0.609901	1	3786	tags=40%, list=27%, signal=55%
GO_REGULATION_OF_WNT_SIGNALING_PATHWAY	316	0.0570137	1.13502	0.29	0.609532	1	1762	tags=18%, list=13%, signal=21%
GO_REGULATION_OF_PROTEIN_TYROSINE_KINASE_ACTIVITY	77	0.110475	1.13487	0.303823	0.609194	1	5469	tags=51%, list=40%, signal=83%
GO_PHARYNGEAL_SYSTEM_DEVELOPMENT	19	0.212831	1.13389	0.293069	0.610557	1	5778	tags=63%, list=42%, signal=109%
GO_DETECTION_OF_EXTERNAL_BIOTIC_STIMULUS	15	0.245311	1.13374	0.282209	0.610217	1	6733	tags=73%, list=49%, signal=143%
GO_ANAPHASE_PROMOTING_COMPLEX_DEPENDENT_CATABOLIC_PROCESS	78	0.109803	1.13371	0.316981	0.609601	1	10693	tags=88%, list=78%, signal=392%
GO_REGULATION_OF_SMALL_GTPASE_MEDIATED_SIGNAL_TRANSDUCTION	305	0.0545029	1.13354	0.270707	0.60925	1	5956	tags=49%, list=43%, signal=84%
GO_NEUROBLAST_PROLIFERATION	55	0.127686	1.13319	0.304094	0.609321	1	4263	tags=44%, list=31%, signal=63%
GO_CYCLIC_NUCLEOTIDE_BIOSYNTHETIC_PROCESS	18	0.221787	1.13319	0.290258	0.608657	1	4606	tags=56%, list=33%, signal=83%
GO_CELL_CELL_SIGNALING_BY_WNT	460	0.0447618	1.13267	0.28827	0.609073	1	9026	tags=70%, list=65%, signal=195%
GO_CELLULAR_RESPONSE_TO_STEROL	18	0.218023	1.13202	0.283364	0.60972	1	5424	tags=61%, list=39%, signal=101%
GO_NEGATIVE_REGULATION_OF_PROTEIN_TYROSINE_KINASE_ACTIVITY	26	0.187259	1.13124	0.305613	0.610564	1	6969	tags=69%, list=51%, signal=140%
GO_PROTEIN_TRANSMEMBRANE_TRANSPORT	58	0.124965	1.13118	0.300207	0.609996	1	8745	tags=76%, list=63%, signal=206%
GO_MEMBRANE_PROTEIN_INTRACELLULAR_DOMAIN_PROTEOLYSIS	18	0.218991	1.13107	0.285714	0.609539	1	6943	tags=72%, list=50%, signal=145%
GO_REGULATION_OF_ENDOPLASMIC_RETICULUM_STRESS_INDUCED_INTRINSIC_APOPTOTIC_SIGNALING_PATHWAY	28	0.179794	1.13083	0.304348	0.609329	1	4420	tags=50%, list=32%, signal=73%
GO_COGNITION	257	0.0624029	1.13035	0.275194	0.609633	1	7150	tags=58%, list=52%, signal=118%
GO_SYNAPTIC_VESICLE_RECYCLING	62	0.122931	1.13024	0.300207	0.609194	1	7876	tags=69%, list=57%, signal=161%
GO_REGULATION_OF_SYNAPTIC_PLASTICITY	175	0.0743554	1.12956	0.305447	0.609932	1	2060	tags=22%, list=15%, signal=26%
GO_VIRAL_GENOME_REPLICATION	85	0.105998	1.12798	0.297959	0.612496	1	8930	tags=75%, list=65%, signal=212%
GO_REGULATION_OF_PROTEIN_MODIFICATION_BY_SMALL_PROTEIN_CONJUGATION_OR_REMOVAL	199	0.0691669	1.12783	0.294118	0.612117	1	8969	tags=72%, list=65%, signal=203%
GO_ENDOCARDIAL_CUSHION_FORMATION	20	0.210849	1.12757	0.291262	0.612017	1	5370	tags=60%, list=39%, signal=98%
GO_G_PROTEIN_COUPLED_RECEPTOR_SIGNALING_PATHWAY_COUPLED_TO_CYCLIC_NUCLEOTIDE_SECOND_MESSENGER	169	0.0736704	1.12751	0.294118	0.611501	1	2178	tags=23%, list=16%, signal=27%
GO_INTERFERON_ALPHA_PRODUCTION	25	0.185242	1.12727	0.315464	0.611297	1	3517	tags=44%, list=26%, signal=59%
GO_ICOSANOID_BIOSYNTHETIC_PROCESS	28	0.177679	1.12701	0.281437	0.611186	1	9867	tags=89%, list=72%, signal=313%
GO_MYOBLAST_FUSION	25	0.188531	1.12576	0.32	0.612908	1	4575	tags=52%, list=33%, signal=78%
GO_TRANSCRIPTION_ELONGATION_FROM_RNA_POLYMERASE_II_PROMOTER	79	0.105834	1.12519	0.290581	0.613432	1	7800	tags=67%, list=57%, signal=154%
GO_UTERUS_DEVELOPMENT	15	0.240505	1.12516	0.289474	0.612819	1	8638	tags=87%, list=63%, signal=232%
GO_T_CELL_APOPTOTIC_PROCESS	33	0.164374	1.12508	0.28827	0.612349	1	9439	tags=85%, list=68%, signal=268%
GO_MODULATION_BY_SYMBIONT_OF_HOST_CELLULAR_PROCESS	23	0.200228	1.12449	0.293886	0.612925	1	6836	tags=70%, list=50%, signal=138%
GO_CARDIAC_SEPTUM_MORPHOGENESIS	61	0.122484	1.12423	0.298	0.612753	1	5778	tags=54%, list=42%, signal=93%
GO_POSITIVE_REGULATION_OF_GENE_EXPRESSION_EPIGENETIC	49	0.136972	1.12383	0.305556	0.612904	1	7686	tags=69%, list=56%, signal=156%
GO_MYELOID_LEUKOCYTE_MIGRATION	121	0.088602	1.12297	0.302846	0.61396	1	7108	tags=60%, list=52%, signal=123%
GO_CELLULAR_RESPONSE_TO_GROWTH_HORMONE_STIMULUS	17	0.229388	1.12293	0.309091	0.613371	1	5763	tags=65%, list=42%, signal=111%
GO_REGULATION_OF_LYMPHOCYTE_ACTIVATION	301	0.056739	1.12263	0.295585	0.61326	1	6152	tags=50%, list=45%, signal=89%
GO_REGULATION_OF_DENDRITIC_SPINE_MORPHOGENESIS	40	0.149809	1.12158	0.284884	0.614747	1	8627	tags=78%, list=63%, signal=206%
GO_EMBRYONIC_CRANIAL_SKELETON_MORPHOGENESIS	36	0.156476	1.12126	0.307087	0.614738	1	3976	tags=44%, list=29%, signal=62%
GO_NOTOCHORD_DEVELOPMENT	16	0.235295	1.12084	0.305343	0.614876	1	7963	tags=81%, list=58%, signal=192%
GO_GOLGI_VESICLE_TRANSPORT	326	0.0542857	1.12036	0.281116	0.615144	1	10267	tags=80%, list=74%, signal=305%
GO_REGULATION_OF_NEUROINFLAMMATORY_RESPONSE	22	0.198975	1.11898	0.293413	0.61728	1	7916	tags=77%, list=57%, signal=181%
GO_REGULATION_OF_TRANSLATIONAL_ELONGATION	17	0.224908	1.11879	0.29368	0.617034	1	3391	tags=47%, list=25%, signal=62%
GO_REGULATION_OF_DNA_METHYLATION	16	0.235821	1.11871	0.307843	0.61654	1	4508	tags=56%, list=33%, signal=83%
GO_NEGATIVE_REGULATION_OF_INTRINSIC_APOPTOTIC_SIGNALING_PATHWAY_IN_RESPONSE_TO_DNA_DAMAGE	30	0.172233	1.11834	0.305955	0.616654	1	3605	tags=43%, list=26%, signal=59%
GO_NEGATIVE_REGULATION_OF_PROTEOLYSIS_INVOLVED_IN_CELLULAR_PROTEIN_CATABOLIC_PROCESS	63	0.118347	1.1182	0.297131	0.616278	1	10633	tags=89%, list=77%, signal=386%
GO_CAMERA_TYPE_EYE_MORPHOGENESIS	92	0.100441	1.11755	0.321649	0.616962	1	1771	tags=23%, list=13%, signal=26%
GO_OUTFLOW_TRACT_MORPHOGENESIS	64	0.118593	1.11751	0.319502	0.616394	1	6344	tags=58%, list=46%, signal=107%
GO_NEUROTRANSMITTER_BIOSYNTHETIC_PROCESS	70	0.113489	1.11497	0.294	0.620736	1	1003	tags=19%, list=7%, signal=20%
GO_NEGATIVE_REGULATION_OF_EPITHELIAL_CELL_APOPTOTIC_PROCESS	30	0.174428	1.11443	0.311111	0.62117	1	1736	tags=30%, list=13%, signal=34%
GO_ACTIVATION_OF_ADENYLATE_CYCLASE_ACTIVITY	35	0.159515	1.11369	0.292017	0.621985	1	1745	tags=29%, list=13%, signal=33%
GO_POSITIVE_REGULATION_OF_CYTOKINESIS	26	0.184107	1.11309	0.309278	0.622501	1	2769	tags=38%, list=20%, signal=48%
GO_VESICLE_CYTOSKELETAL_TRAFFICKING	47	0.138753	1.11216	0.283096	0.623728	1	9829	tags=85%, list=71%, signal=295%
GO_NEGATIVE_REGULATION_OF_AXON_GUIDANCE	27	0.180673	1.11172	0.314229	0.623997	1	7217	tags=70%, list=52%, signal=147%
GO_RESPONSE_TO_RADIATION	375	0.0496935	1.11155	0.327731	0.623678	1	8085	tags=63%, list=59%, signal=149%
GO_NEGATIVE_REGULATION_OF_PEPTIDYL_LYSINE_ACETYLATION	17	0.226228	1.1115	0.327869	0.623136	1	7429	tags=76%, list=54%, signal=166%
GO_FOREBRAIN_NEURON_DIFFERENTIATION	46	0.13983	1.11104	0.31286	0.6234	1	8870	tags=78%, list=64%, signal=219%
GO_NEGATIVE_REGULATION_OF_NIK_NF_KAPPAB_SIGNALING	17	0.224519	1.1107	0.278926	0.623453	1	9075	tags=88%, list=66%, signal=258%
GO_REGULATION_OF_CALCIUM_ION_TRANSPORT_INTO_CYTOSOL	81	0.104906	1.11056	0.286885	0.623107	1	7925	tags=68%, list=57%, signal=159%
GO_REGULATION_OF_POSTSYNAPTIC_DENSITY_ORGANIZATION	15	0.239053	1.11009	0.318898	0.623416	1	4061	tags=53%, list=29%, signal=76%
GO_HYPOTHALAMUS_DEVELOPMENT	16	0.228512	1.10964	0.33543	0.623676	1	299	tags=25%, list=2%, signal=26%
GO_REGULATION_OF_BEHAVIOR	48	0.135292	1.10942	0.292929	0.623494	1	3024	tags=35%, list=22%, signal=45%
GO_AMYLOID_BETA_METABOLIC_PROCESS	39	0.155368	1.10673	0.320408	0.628325	1	2813	tags=36%, list=20%, signal=45%
GO_INTRACELLULAR_ESTROGEN_RECEPTOR_SIGNALING_PATHWAY	48	0.132681	1.10539	0.318841	0.630354	1	5933	tags=56%, list=43%, signal=98%
GO_PROTEIN_DEMANNOSYLATION	19	0.206984	1.10503	0.331325	0.630429	1	3681	tags=47%, list=27%, signal=65%
GO_POSITIVE_REGULATION_OF_T_CELL_MIGRATION	20	0.209259	1.10417	0.333973	0.631556	1	6771	tags=70%, list=49%, signal=137%
GO_TOLL_LIKE_RECEPTOR_SIGNALING_PATHWAY	113	0.0882459	1.10396	0.319277	0.631329	1	9898	tags=81%, list=72%, signal=283%
GO_NEGATIVE_REGULATION_OF_DNA_RECOMBINATION	24	0.187441	1.10374	0.333996	0.631122	1	8911	tags=83%, list=65%, signal=235%
GO_STEROL_TRANSPORT	69	0.113528	1.10312	0.305609	0.631762	1	4837	tags=46%, list=35%, signal=71%
GO_REGULATION_OF_VIRAL_INDUCED_CYTOPLASMIC_PATTERN_RECOGNITION_RECEPTOR_SIGNALING_PATHWAY	17	0.224827	1.10293	0.322917	0.631497	1	9882	tags=94%, list=72%, signal=332%
GO_CELLULAR_RESPONSE_TO_PROSTAGLANDIN_STIMULUS	17	0.221983	1.10186	0.328542	0.633021	1	5865	tags=65%, list=43%, signal=112%
GO_NEGATIVE_REGULATION_OF_TRANSCRIPTION_REGULATORY_REGION_DNA_BINDING	15	0.233595	1.10166	0.323851	0.632775	1	5975	tags=67%, list=43%, signal=118%
GO_FOREBRAIN_NEURON_DEVELOPMENT	28	0.173615	1.10101	0.320641	0.633442	1	10908	tags=96%, list=79%, signal=460%
GO_ESTABLISHMENT_OF_PLANAR_POLARITY_OF_EMBRYONIC_EPITHELIUM	17	0.220458	1.10022	0.319838	0.634402	1	5886	tags=65%, list=43%, signal=113%
GO_NUCLEAR_BODY_ORGANIZATION	15	0.23342	1.1002	0.312236	0.633793	1	5058	tags=60%, list=37%, signal=95%
GO_REGULATION_OF_SYMBIOSIS_ENCOMPASSING_MUTUALISM_THROUGH_PARASITISM	163	0.0742161	1.09997	0.322957	0.633619	1	8379	tags=68%, list=61%, signal=171%
GO_RESPONSE_TO_HEAT	152	0.0752901	1.09993	0.30916	0.633057	1	6412	tags=54%, list=46%, signal=100%
GO_NEGATIVE_REGULATION_OF_DNA_BIOSYNTHETIC_PROCESS	30	0.173665	1.09966	0.326489	0.632944	1	4045	tags=47%, list=29%, signal=66%
GO_POSITIVE_REGULATION_OF_DNA_BINDING_TRANSCRIPTION_FACTOR_ACTIVITY	217	0.0644571	1.09911	0.348291	0.633384	1	11644	tags=91%, list=84%, signal=574%
GO_NEGATIVE_REGULATION_OF_REACTIVE_OXYGEN_SPECIES_BIOSYNTHETIC_PROCESS	23	0.188383	1.09909	0.301811	0.632777	1	1003	tags=26%, list=7%, signal=28%
GO_ATRIOVENTRICULAR_VALVE_DEVELOPMENT	21	0.199554	1.09906	0.320866	0.632216	1	4475	tags=52%, list=32%, signal=77%
GO_RESPONSE_TO_BACTERIUM	356	0.0513871	1.09876	0.340816	0.632166	1	9187	tags=72%, list=67%, signal=209%
GO_REGULATION_OF_TRANSCRIPTION_FROM_RNA_POLYMERASE_II_PROMOTER_IN_RESPONSE_TO_HYPOXIA	72	0.111907	1.09875	0.334586	0.631543	1	8807	tags=75%, list=64%, signal=206%
GO_NEGATIVE_REGULATION_OF_ORGANELLE_ORGANIZATION	321	0.0532696	1.09857	0.338912	0.631294	1	10151	tags=79%, list=74%, signal=292%
GO_NEGATIVE_REGULATION_OF_PROTEIN_ACETYLATION	19	0.211971	1.09844	0.327731	0.630912	1	5064	tags=58%, list=37%, signal=91%
GO_HISTONE_H4_K16_ACETYLATION	20	0.205417	1.09842	0.330612	0.63031	1	8203	tags=80%, list=59%, signal=197%
GO_POSITIVE_REGULATION_OF_TELOMERE_MAINTENANCE	49	0.137588	1.09802	0.312741	0.630474	1	2330	tags=31%, list=17%, signal=37%
GO_NEGATIVE_REGULATION_OF_OSSIFICATION	56	0.124176	1.09777	0.326296	0.63037	1	2480	tags=30%, list=18%, signal=37%
GO_REGULATION_OF_PRODUCTION_OF_SMALL_RNA_INVOLVED_IN_GENE_SILENCING_BY_RNA	19	0.215238	1.09734	0.335329	0.630538	1	5019	tags=58%, list=36%, signal=91%
GO_T_CELL_RECEPTOR_SIGNALING_PATHWAY	151	0.075956	1.09726	0.32	0.630072	1	11110	tags=88%, list=81%, signal=448%
GO_G0_TO_G1_TRANSITION	40	0.145197	1.09724	0.334004	0.629466	1	6277	tags=60%, list=46%, signal=110%
GO_CLEAVAGE_INVOLVED_IN_RRNA_PROCESSING	21	0.195549	1.09674	0.331407	0.629822	1	7157	tags=71%, list=52%, signal=148%
GO_POSTSYNAPTIC_DENSITY_ASSEMBLY	18	0.213134	1.09661	0.336066	0.629445	1	3959	tags=50%, list=29%, signal=70%
GO_CRANIAL_SKELETAL_SYSTEM_DEVELOPMENT	51	0.127738	1.09647	0.345455	0.629089	1	948	tags=20%, list=7%, signal=21%
GO_POSITIVE_REGULATION_OF_PROTEIN_COMPLEX_ASSEMBLY	214	0.0641392	1.09629	0.319742	0.628808	1	7957	tags=64%, list=58%, signal=149%
GO_POSITIVE_REGULATION_OF_PEPTIDE_HORMONE_SECRETION	70	0.110521	1.09622	0.319361	0.628331	1	4787	tags=46%, list=35%, signal=70%
GO_REGULATION_OF_CHROMOSOME_SEPARATION	57	0.12283	1.09516	0.32948	0.629789	1	7748	tags=68%, list=56%, signal=156%
GO_DIVALENT_INORGANIC_CATION_TRANSPORT	376	0.050246	1.09502	0.327696	0.629443	1	4790	tags=40%, list=35%, signal=59%
GO_POSITIVE_REGULATION_OF_AXONOGENESIS	80	0.103128	1.09431	0.328947	0.630224	1	7032	tags=61%, list=51%, signal=124%
GO_CARDIAC_MUSCLE_CELL_DIFFERENTIATION	91	0.0968269	1.09314	0.327968	0.632026	1	4886	tags=45%, list=35%, signal=69%
GO_NEGATIVE_REGULATION_OF_UBIQUITIN_DEPENDENT_PROTEIN_CATABOLIC_PROCESS	44	0.13845	1.0931	0.338266	0.631472	1	10633	tags=91%, list=77%, signal=396%
GO_OUTFLOW_TRACT_SEPTUM_MORPHOGENESIS	21	0.200311	1.09305	0.329268	0.630949	1	5778	tags=62%, list=42%, signal=106%
GO_FORMATION_OF_PRIMARY_GERM_LAYER	89	0.0986275	1.09196	0.332673	0.63255	1	7635	tags=65%, list=55%, signal=145%
GO_CYTOKINE_PRODUCTION_INVOLVED_IN_INFLAMMATORY_RESPONSE	31	0.164221	1.09126	0.359127	0.633327	1	5747	tags=58%, list=42%, signal=99%
GO_CELLULAR_RESPONSE_TO_DEXAMETHASONE_STIMULUS	27	0.177662	1.09103	0.322266	0.633179	1	3683	tags=44%, list=27%, signal=61%
GO_PROTEIN_HETEROTETRAMERIZATION	27	0.17662	1.09089	0.342916	0.632843	1	2165	tags=33%, list=16%, signal=39%
GO_ADULT_BEHAVIOR	112	0.0873608	1.08911	0.3361	0.63581	1	651	tags=13%, list=5%, signal=14%
GO_EXTRINSIC_APOPTOTIC_SIGNALING_PATHWAY	192	0.0688883	1.08898	0.342159	0.635432	1	10842	tags=85%, list=79%, signal=394%
GO_MAMMARY_GLAND_DUCT_MORPHOGENESIS	27	0.174941	1.08885	0.324948	0.635114	1	9339	tags=85%, list=68%, signal=263%
GO_MACROPHAGE_DIFFERENTIATION	34	0.159245	1.08877	0.354379	0.634636	1	5515	tags=56%, list=40%, signal=93%
GO_STEROID_BIOSYNTHETIC_PROCESS	135	0.0805295	1.08871	0.332681	0.634145	1	4620	tags=41%, list=34%, signal=62%
GO_TYPE_2_IMMUNE_RESPONSE	21	0.199336	1.08824	0.337838	0.634456	1	9075	tags=86%, list=66%, signal=250%
GO_DEVELOPMENTAL_GROWTH_INVOLVED_IN_MORPHOGENESIS	209	0.0660394	1.08792	0.335283	0.634477	1	8538	tags=68%, list=62%, signal=177%
GO_INTRINSIC_APOPTOTIC_SIGNALING_PATHWAY_IN_RESPONSE_TO_ENDOPLASMIC_RETICULUM_STRESS	52	0.127089	1.08719	0.350913	0.635322	1	4618	tags=46%, list=33%, signal=69%
GO_CELL_CELL_ADHESION_MEDIATED_BY_CADHERIN	31	0.162343	1.08717	0.334661	0.634727	1	1769	tags=29%, list=13%, signal=33%
GO_RNA_POLYADENYLATION	42	0.143231	1.08705	0.338	0.634349	1	1970	tags=29%, list=14%, signal=33%
GO_NEGATIVE_REGULATION_OF_ENDOTHELIAL_CELL_APOPTOTIC_PROCESS	22	0.192537	1.08687	0.352705	0.6341	1	1736	tags=32%, list=13%, signal=36%
GO_OSTEOBLAST_DIFFERENTIATION	178	0.070241	1.08564	0.34308	0.635902	1	1832	tags=20%, list=13%, signal=23%
GO_MAMMARY_GLAND_EPITHELIUM_DEVELOPMENT	58	0.121129	1.08553	0.356	0.635508	1	9511	tags=81%, list=69%, signal=260%
GO_POSITIVE_REGULATION_OF_MUSCLE_TISSUE_DEVELOPMENT	57	0.12091	1.08532	0.337255	0.635327	1	9468	tags=81%, list=69%, signal=256%
GO_REGULATION_OF_INTRINSIC_APOPTOTIC_SIGNALING_PATHWAY	138	0.0801034	1.08519	0.326572	0.634941	1	2503	tags=26%, list=18%, signal=32%
GO_REGULATION_OF_SENSORY_PERCEPTION	28	0.17197	1.08395	0.356108	0.636808	1	2065	tags=32%, list=15%, signal=38%
GO_REGULATION_OF_PROTEIN_BINDING	186	0.0683454	1.0839	0.348178	0.636277	1	3073	tags=29%, list=22%, signal=37%
GO_COLUMNAR_CUBOIDAL_EPITHELIAL_CELL_DEVELOPMENT	46	0.132451	1.08281	0.320084	0.637851	1	8072	tags=72%, list=59%, signal=172%
GO_NUCLEOBASE_CONTAINING_SMALL_MOLECULE_INTERCONVERSION	28	0.170784	1.08256	0.361829	0.637711	1	4544	tags=50%, list=33%, signal=74%
GO_REGULATION_OF_PROTEIN_LOCALIZATION_TO_CELL_PERIPHERY	98	0.0925171	1.08253	0.32681	0.637179	1	2391	tags=27%, list=17%, signal=32%
GO_PURINE_NUCLEOSIDE_MONOPHOSPHATE_METABOLIC_PROCESS	19	0.209151	1.08218	0.331967	0.637204	1	4377	tags=53%, list=32%, signal=77%
GO_POSITIVE_REGULATION_OF_PHOSPHATIDYLINOSITOL_3_KINASE_SIGNALING	69	0.110809	1.08179	0.345083	0.637399	1	2276	tags=28%, list=17%, signal=33%
GO_REGULATION_OF_VASCULAR_PERMEABILITY	26	0.178099	1.08142	0.335984	0.637574	1	730	tags=23%, list=5%, signal=24%
GO_METAPHASE_PLATE_CONGRESSION	54	0.123535	1.08106	0.340292	0.637714	1	7496	tags=67%, list=54%, signal=145%
GO_CYTOKINE_PRODUCTION_INVOLVED_IN_IMMUNE_RESPONSE	68	0.112451	1.081	0.346	0.637192	1	6771	tags=60%, list=49%, signal=118%
GO_POSITIVE_REGULATION_OF_INTERFERON_BETA_PRODUCTION	29	0.16727	1.0799	0.338462	0.638724	1	1977	tags=31%, list=14%, signal=36%
GO_EYE_PHOTORECEPTOR_CELL_DEVELOPMENT	24	0.18755	1.07983	0.344358	0.638248	1	2014	tags=33%, list=15%, signal=39%
GO_REGULATION_OF_NEURAL_PRECURSOR_CELL_PROLIFERATION	75	0.103969	1.07796	0.359922	0.641383	1	4641	tags=44%, list=34%, signal=66%
GO_CARDIOCYTE_DIFFERENTIATION	115	0.0863016	1.07785	0.343621	0.640997	1	3016	tags=30%, list=22%, signal=39%
GO_ADRENAL_GLAND_DEVELOPMENT	20	0.194957	1.07778	0.337374	0.640512	1	762	tags=25%, list=6%, signal=26%
GO_REGULATION_OF_MACROPHAGE_DIFFERENTIATION	18	0.211416	1.07756	0.362319	0.64034	1	5515	tags=61%, list=40%, signal=102%
GO_MACROPHAGE_CHEMOTAXIS	21	0.198133	1.07717	0.355556	0.640519	1	5808	tags=62%, list=42%, signal=107%
GO_T_CELL_MEDIATED_IMMUNITY	61	0.116026	1.07663	0.358527	0.641	1	6771	tags=61%, list=49%, signal=119%
GO_NCRNA_TRANSCRIPTION	94	0.0964895	1.07587	0.341603	0.641901	1	8067	tags=68%, list=58%, signal=163%
GO_POSITIVE_REGULATION_OF_PEPTIDYL_LYSINE_ACETYLATION	28	0.16766	1.07552	0.335341	0.642064	1	4587	tags=50%, list=33%, signal=75%
GO_CELL_CYCLE_G2_M_PHASE_TRANSITION	249	0.0586182	1.07532	0.347826	0.641863	1	10670	tags=83%, list=77%, signal=361%
GO_POSITIVE_REGULATION_OF_CALCIUM_ION_DEPENDENT_EXOCYTOSIS	22	0.191989	1.07522	0.346899	0.641499	1	4251	tags=50%, list=31%, signal=72%
GO_NEUROTRANSMITTER_RECEPTOR_INTERNALIZATION	23	0.183406	1.07367	0.343882	0.643971	1	6468	tags=65%, list=47%, signal=123%
GO_CELL_PROLIFERATION_INVOLVED_IN_KIDNEY_DEVELOPMENT	16	0.225005	1.07366	0.379242	0.643381	1	4657	tags=56%, list=34%, signal=85%
GO_VESICLE_TARGETING	88	0.0979431	1.07346	0.35497	0.643201	1	9627	tags=80%, list=70%, signal=262%
GO_RNA_INTERFERENCE	15	0.234277	1.07341	0.357422	0.64267	1	2288	tags=40%, list=17%, signal=48%
GO_REGULATION_OF_DENDRITE_MORPHOGENESIS	85	0.0996876	1.07334	0.348697	0.642192	1	8692	tags=73%, list=63%, signal=196%
GO_CALCIUM_ION_REGULATED_EXOCYTOSIS_OF_NEUROTRANSMITTER	15	0.228325	1.07266	0.350195	0.642935	1	2370	tags=40%, list=17%, signal=48%
GO_DEVELOPMENTAL_MATURATION	220	0.0617034	1.072	0.344758	0.643577	1	2484	tags=24%, list=18%, signal=29%
GO_POSITIVE_REGULATION_OF_TYPE_I_INTERFERON_PRODUCTION	70	0.110221	1.07074	0.343434	0.645415	1	3215	tags=34%, list=23%, signal=44%
GO_POSITIVE_REGULATION_OF_PEPTIDYL_SERINE_PHOSPHORYLATION	72	0.10832	1.07026	0.360417	0.645756	1	1003	tags=18%, list=7%, signal=19%
GO_CARDIAC_MUSCLE_CELL_ACTION_POTENTIAL_INVOLVED_IN_CONTRACTION	45	0.134318	1.07018	0.350913	0.645306	1	4282	tags=44%, list=31%, signal=64%
GO_REGULATION_OF_DENDRITE_EXTENSION	20	0.196845	1.06985	0.386076	0.645367	1	736	tags=25%, list=5%, signal=26%
GO_RESPIRATORY_SYSTEM_DEVELOPMENT	164	0.0708833	1.0695	0.347409	0.645471	1	1724	tags=20%, list=13%, signal=22%
GO_EMBRYONIC_HEART_TUBE_DEVELOPMENT	55	0.120764	1.06799	0.359596	0.64783	1	8370	tags=73%, list=61%, signal=184%
GO_PEPTIDYL_PROLINE_MODIFICATION	45	0.134837	1.06696	0.379592	0.649266	1	3049	tags=36%, list=22%, signal=45%
GO_POSITIVE_REGULATION_OF_MACROAUTOPHAGY	61	0.115636	1.06665	0.352	0.649292	1	8585	tags=74%, list=62%, signal=195%
GO_REGULATION_OF_MONOCYTE_DIFFERENTIATION	16	0.223403	1.06642	0.358566	0.649146	1	5541	tags=63%, list=40%, signal=104%
GO_REGULATION_OF_CARDIOCYTE_DIFFERENTIATION	40	0.143186	1.06555	0.362173	0.650336	1	4236	tags=45%, list=31%, signal=65%
GO_REGULATION_OF_TOLL_LIKE_RECEPTOR_4_SIGNALING_PATHWAY	15	0.223476	1.06536	0.342685	0.650068	1	9792	tags=93%, list=71%, signal=322%
GO_T_CELL_HOMEOSTASIS	26	0.17549	1.06534	0.370874	0.649508	1	7131	tags=69%, list=52%, signal=143%
GO_PERK_MEDIATED_UNFOLDED_PROTEIN_RESPONSE	17	0.215739	1.06478	0.388664	0.650101	1	5951	tags=65%, list=43%, signal=114%
GO_PROTEIN_K48_LINKED_UBIQUITINATION	50	0.126791	1.06463	0.36646	0.649796	1	7083	tags=64%, list=51%, signal=131%
GO_RRNA_CONTAINING_RIBONUCLEOPROTEIN_COMPLEX_EXPORT_FROM_NUCLEUS	16	0.216529	1.06392	0.349896	0.650589	1	1326	tags=31%, list=10%, signal=35%
GO_POSITIVE_REGULATION_OF_ANTIGEN_RECEPTOR_MEDIATED_SIGNALING_PATHWAY	18	0.209528	1.06378	0.359743	0.650241	1	5541	tags=61%, list=40%, signal=102%
GO_REGULATION_OF_ACTIVIN_RECEPTOR_SIGNALING_PATHWAY	21	0.196825	1.06349	0.35	0.650211	1	5826	tags=62%, list=42%, signal=107%
GO_NEGATIVE_REGULATION_OF_NUCLEAR_DIVISION	50	0.129816	1.06319	0.366142	0.650173	1	9248	tags=80%, list=67%, signal=242%
GO_REGULATION_OF_MAP_KINASE_ACTIVITY	291	0.0536823	1.06307	0.378698	0.649821	1	10127	tags=79%, list=73%, signal=290%
GO_CELLULAR_RESPONSE_TO_TOPOLOGICALLY_INCORRECT_PROTEIN	141	0.0768763	1.06273	0.35167	0.649925	1	10002	tags=80%, list=73%, signal=289%
GO_POSITIVE_REGULATION_OF_SIGNAL_TRANSDUCTION_BY_P53_CLASS_MEDIATOR	19	0.200399	1.06252	0.371134	0.649742	1	2320	tags=37%, list=17%, signal=44%
GO_MITOTIC_DNA_INTEGRITY_CHECKPOINT	99	0.091708	1.06184	0.372781	0.65042	1	11002	tags=89%, list=80%, signal=436%
GO_REGULATION_OF_RECEPTOR_LOCALIZATION_TO_SYNAPSE	16	0.222455	1.06172	0.369168	0.650065	1	6416	tags=69%, list=47%, signal=128%
GO_PROTEIN_LOCALIZATION_TO_CHROMOSOME_CENTROMERIC_REGION	21	0.190538	1.06164	0.375758	0.649623	1	2629	tags=38%, list=19%, signal=47%
GO_POSITIVE_REGULATION_OF_EPITHELIAL_TO_MESENCHYMAL_TRANSITION	43	0.134061	1.0612	0.351515	0.649909	1	8419	tags=74%, list=61%, signal=190%
GO_CELLULAR_RESPONSE_TO_VIRUS	40	0.142279	1.061	0.348697	0.649736	1	8041	tags=73%, list=58%, signal=173%
GO_POSITIVE_REGULATION_OF_HORMONE_SECRETION	95	0.0944248	1.05976	0.353293	0.651628	1	4948	tags=45%, list=36%, signal=70%
GO_AUTONOMIC_NERVOUS_SYSTEM_DEVELOPMENT	32	0.159934	1.05928	0.362319	0.651961	1	4263	tags=47%, list=31%, signal=68%
GO_STRESS_GRANULE_ASSEMBLY	16	0.220948	1.05895	0.384146	0.652024	1	2989	tags=44%, list=22%, signal=56%
GO_LEUKOCYTE_CELL_CELL_ADHESION	239	0.0582307	1.05803	0.384913	0.65324	1	7923	tags=63%, list=57%, signal=146%
GO_REGULATION_OF_RECEPTOR_MEDIATED_ENDOCYTOSIS	82	0.0986053	1.05777	0.362205	0.653178	1	6720	tags=59%, list=49%, signal=113%
GO_REGULATION_OF_LEUKOCYTE_MIGRATION	125	0.0810479	1.0573	0.400406	0.653524	1	7166	tags=60%, list=52%, signal=124%
GO_POSITIVE_REGULATION_OF_CARDIAC_MUSCLE_TISSUE_DEVELOPMENT	38	0.142266	1.05649	0.372361	0.654561	1	4575	tags=47%, list=33%, signal=71%
GO_NEGATIVE_REGULATION_OF_DNA_DEPENDENT_DNA_REPLICATION	23	0.18134	1.05403	0.38247	0.658804	1	4098	tags=48%, list=30%, signal=68%
GO_CALCIUM_DEPENDENT_CELL_CELL_ADHESION_VIA_PLASMA_MEMBRANE_CELL_ADHESION_MOLECULES	39	0.142379	1.05262	0.379245	0.661038	1	2638	tags=33%, list=19%, signal=41%
GO_NEGATIVE_REGULATION_OF_ACTIN_FILAMENT_BUNDLE_ASSEMBLY	21	0.191732	1.05216	0.361963	0.661371	1	3926	tags=48%, list=28%, signal=66%
GO_REGULATION_OF_ENDOTHELIAL_CELL_MIGRATION	140	0.0767207	1.05192	0.370588	0.661249	1	3286	tags=31%, list=24%, signal=41%
GO_REGULATION_OF_PHOSPHOLIPASE_C_ACTIVITY	34	0.153922	1.05185	0.384158	0.660784	1	4777	tags=50%, list=35%, signal=76%
GO_INTRACELLULAR_PROTEIN_TRANSMEMBRANE_TRANSPORT	50	0.126276	1.05001	0.383795	0.663971	1	8745	tags=76%, list=63%, signal=207%
GO_LIPID_DROPLET_ORGANIZATION	16	0.218085	1.04959	0.366	0.664187	1	9062	tags=88%, list=66%, signal=255%
GO_NEGATIVE_REGULATION_OF_STEM_CELL_DIFFERENTIATION	17	0.211814	1.04908	0.370672	0.664602	1	9250	tags=88%, list=67%, signal=268%
GO_REGULATION_OF_CHONDROCYTE_DIFFERENTIATION	39	0.141714	1.04904	0.392116	0.664077	1	8305	tags=74%, list=60%, signal=186%
GO_REGULATION_OF_TUMOR_NECROSIS_FACTOR_MEDIATED_SIGNALING_PATHWAY	43	0.133826	1.04866	0.358121	0.664226	1	10988	tags=93%, list=80%, signal=456%
GO_NEUROMUSCULAR_SYNAPTIC_TRANSMISSION	23	0.183649	1.04813	0.361493	0.664635	1	2867	tags=39%, list=21%, signal=49%
GO_SCF_DEPENDENT_PROTEASOMAL_UBIQUITIN_DEPENDENT_PROTEIN_CATABOLIC_PROCESS	84	0.0960927	1.04704	0.393195	0.666253	1	9846	tags=81%, list=71%, signal=281%
GO_REGULATION_OF_CELL_CYCLE_G2_M_PHASE_TRANSITION	197	0.0647225	1.04641	0.383698	0.666899	1	10670	tags=84%, list=77%, signal=365%
GO_PROGRAMMED_NECROTIC_CELL_DEATH	35	0.149605	1.04612	0.384615	0.666859	1	11338	tags=97%, list=82%, signal=545%
GO_NEGATIVE_REGULATION_OF_WNT_SIGNALING_PATHWAY	181	0.0668313	1.046	0.392276	0.666509	1	1680	tags=19%, list=12%, signal=21%
GO_ANTERIOR_POSTERIOR_AXIS_SPECIFICATION	33	0.152057	1.04546	0.380165	0.666979	1	7101	tags=67%, list=51%, signal=137%
GO_SOMATIC_RECOMBINATION_OF_IMMUNOGLOBULIN_GENE_SEGMENTS	35	0.151678	1.04311	0.389328	0.671153	1	4611	tags=49%, list=33%, signal=73%
GO_CYTOPLASMIC_TRANSLATIONAL_INITIATION	29	0.168317	1.04294	0.383795	0.670869	1	5767	tags=59%, list=42%, signal=101%
GO_SPINAL_CORD_PATTERNING	18	0.203877	1.04274	0.392045	0.670684	1	1788	tags=33%, list=13%, signal=38%
GO_REGULATION_OF_TRANSCRIPTION_ELONGATION_FROM_RNA_POLYMERASE_II_PROMOTER	28	0.165446	1.04158	0.357278	0.672411	1	5110	tags=54%, list=37%, signal=85%
GO_MATURATION_OF_5_8S_RRNA_FROM_TRICISTRONIC_RRNA_TRANSCRIPT_SSU_RRNA_5_8S_RRNA_LSU_RRNA_	21	0.192302	1.0413	0.380567	0.672412	1	11142	tags=100%, list=81%, signal=520%
GO_RESPONSE_TO_RETINOIC_ACID	84	0.0957879	1.04077	0.406061	0.672877	1	5089	tags=46%, list=37%, signal=73%
GO_REGULATION_OF_APOPTOTIC_SIGNALING_PATHWAY	347	0.0498475	1.04075	0.366864	0.672315	1	1475	tags=16%, list=11%, signal=17%
GO_NEGATIVE_REGULATION_OF_CELL_CYCLE_PHASE_TRANSITION	215	0.0612075	1.04062	0.39243	0.67196	1	10714	tags=84%, list=78%, signal=369%
GO_PROTEIN_KINASE_A_SIGNALING	21	0.183754	1.03986	0.39521	0.672891	1	10603	tags=95%, list=77%, signal=411%
GO_NUCLEUS_ORGANIZATION	112	0.0829126	1.03827	0.387712	0.675512	1	4529	tags=41%, list=33%, signal=61%
GO_CELLULAR_RESPONSE_TO_CADMIUM_ION	26	0.169742	1.03805	0.385965	0.6753	1	4558	tags=50%, list=33%, signal=75%
GO_REGULATION_OF_LEUKOCYTE_MEDIATED_IMMUNITY	124	0.0792602	1.03757	0.396226	0.675659	1	9259	tags=75%, list=67%, signal=226%
GO_METANEPHRIC_EPITHELIUM_DEVELOPMENT	18	0.204337	1.03734	0.398833	0.675496	1	7911	tags=78%, list=57%, signal=182%
GO_REGULATION_OF_TYPE_2_IMMUNE_RESPONSE	20	0.192168	1.03733	0.396552	0.67491	1	9075	tags=85%, list=66%, signal=248%
GO_SEQUESTERING_OF_CALCIUM_ION	104	0.0859399	1.036	0.373254	0.677034	1	4790	tags=43%, list=35%, signal=66%
GO_NEGATIVE_REGULATION_OF_PROTEIN_CATABOLIC_PROCESS	113	0.08482	1.03574	0.390873	0.677007	1	4819	tags=43%, list=35%, signal=66%
GO_NEGATIVE_REGULATION_OF_SMOOTHENED_SIGNALING_PATHWAY	27	0.166901	1.0357	0.408907	0.676471	1	1788	tags=30%, list=13%, signal=34%
GO_CELL_DIFFERENTIATION_INVOLVED_IN_METANEPHROS_DEVELOPMENT	18	0.204337	1.03555	0.365079	0.676181	1	7911	tags=78%, list=57%, signal=182%
GO_POSITIVE_REGULATION_OF_STRIATED_MUSCLE_CELL_DIFFERENTIATION	41	0.138593	1.03551	0.385659	0.675663	1	1457	tags=24%, list=11%, signal=27%
GO_FOREBRAIN_CELL_MIGRATION	56	0.116915	1.03513	0.389899	0.675844	1	2826	tags=32%, list=20%, signal=40%
GO_CARDIAC_SEPTUM_DEVELOPMENT	90	0.0931246	1.03504	0.380252	0.675448	1	6538	tags=57%, list=47%, signal=107%
GO_VENTRICULAR_SEPTUM_DEVELOPMENT	58	0.115929	1.03416	0.382178	0.676691	1	5778	tags=53%, list=42%, signal=92%
GO_POSITIVE_REGULATION_OF_CALCIUM_ION_TRANSPORT	85	0.0942721	1.03379	0.384466	0.676873	1	7306	tags=62%, list=53%, signal=132%
GO_ATTACHMENT_OF_SPINDLE_MICROTUBULES_TO_KINETOCHORE	28	0.170659	1.0333	0.401222	0.67729	1	8486	tags=79%, list=62%, signal=204%
GO_POSITIVE_REGULATION_OF_VASCULAR_ASSOCIATED_SMOOTH_MUSCLE_CELL_MIGRATION	16	0.208825	1.03191	0.393053	0.679506	1	3156	tags=44%, list=23%, signal=57%
GO_POSTSYNAPSE_ASSEMBLY	29	0.164193	1.03138	0.378661	0.680024	1	3446	tags=41%, list=25%, signal=55%
GO_DNA_DAMAGE_RESPONSE_SIGNAL_TRANSDUCTION_BY_P53_CLASS_MEDIATOR	98	0.0881994	1.03072	0.389937	0.680667	1	8642	tags=71%, list=63%, signal=190%
GO_ENDODERM_DEVELOPMENT	53	0.121802	1.0307	0.405295	0.680126	1	2489	tags=30%, list=18%, signal=37%
GO_RNA_STABILIZATION	38	0.137404	1.02884	0.407186	0.683262	1	8634	tags=76%, list=63%, signal=204%
GO_REGULATION_OF_DEFENSE_RESPONSE_TO_VIRUS	50	0.12435	1.02864	0.413043	0.683068	1	7944	tags=70%, list=58%, signal=165%
GO_ODONTOGENESIS	95	0.0888158	1.02861	0.411523	0.68253	1	6041	tags=53%, list=44%, signal=93%
GO_RESPONSE_TO_MANGANESE_ION	18	0.201566	1.02845	0.39881	0.68226	1	7183	tags=72%, list=52%, signal=151%
GO_REGULATION_OF_DNA_DEPENDENT_DNA_REPLICATION	45	0.125409	1.02842	0.403259	0.681729	1	4098	tags=42%, list=30%, signal=60%
GO_FAT_CELL_DIFFERENTIATION	182	0.0666826	1.02796	0.399209	0.68206	1	3638	tags=33%, list=26%, signal=44%
GO_DEFENSE_RESPONSE_TO_VIRUS	158	0.0707456	1.02769	0.39645	0.68201	1	8374	tags=68%, list=61%, signal=170%
GO_EMBRYONIC_PLACENTA_DEVELOPMENT	70	0.103896	1.02761	0.382353	0.681571	1	6257	tags=56%, list=45%, signal=101%
GO_REGULATION_OF_TELOMERASE_ACTIVITY	47	0.12929	1.0275	0.401728	0.681186	1	2330	tags=30%, list=17%, signal=36%
GO_LAMELLIPODIUM_MORPHOGENESIS	16	0.21485	1.02741	0.42915	0.680771	1	3073	tags=44%, list=22%, signal=56%
GO_MUSCLE_CELL_PROLIFERATION	161	0.0677643	1.02725	0.406504	0.680506	1	2930	tags=28%, list=21%, signal=35%
GO_LIPOPOLYSACCHARIDE_MEDIATED_SIGNALING_PATHWAY	45	0.129662	1.02664	0.408081	0.681116	1	8943	tags=78%, list=65%, signal=221%
GO_SECONDARY_PALATE_DEVELOPMENT	20	0.191823	1.02641	0.415778	0.681023	1	5632	tags=60%, list=41%, signal=101%
GO_REGULATION_OF_CARDIAC_MUSCLE_TISSUE_DEVELOPMENT	66	0.108101	1.02492	0.416016	0.683468	1	4575	tags=44%, list=33%, signal=65%
GO_ACTION_POTENTIAL	113	0.0815838	1.02413	0.392786	0.684569	1	4131	tags=38%, list=30%, signal=54%
GO_REGULATION_OF_SYNAPSE_ASSEMBLY	100	0.0883018	1.02261	0.414729	0.687164	1	3479	tags=34%, list=25%, signal=45%
GO_REGULATION_OF_TORC1_SIGNALING	26	0.170974	1.02238	0.428298	0.687002	1	8254	tags=77%, list=60%, signal=191%
GO_TERMINATION_OF_RNA_POLYMERASE_I_TRANSCRIPTION	29	0.162218	1.02202	0.380228	0.687087	1	11082	tags=97%, list=80%, signal=490%
GO_REGULATION_OF_PROTEIN_SUMOYLATION	19	0.197579	1.02183	0.452333	0.68687	1	1633	tags=32%, list=12%, signal=36%
GO_MISMATCH_REPAIR	31	0.154738	1.02181	0.397233	0.686321	1	4098	tags=45%, list=30%, signal=64%
GO_TRANSCRIPTION_ELONGATION_FROM_RNA_POLYMERASE_I_PROMOTER	28	0.160972	1.02111	0.448692	0.687127	1	11082	tags=96%, list=80%, signal=490%
GO_POSITIVE_REGULATION_OF_TYROSINE_PHOSPHORYLATION_OF_STAT_PROTEIN	38	0.142193	1.0203	0.395711	0.68814	1	4576	tags=47%, list=33%, signal=71%
GO_POSITIVE_REGULATION_OF_ACUTE_INFLAMMATORY_RESPONSE	16	0.210681	1.02018	0.394958	0.687782	1	9164	tags=88%, list=66%, signal=260%
GO_CELLULAR_RESPONSE_TO_STEROID_HORMONE_STIMULUS	212	0.0612113	1.01955	0.397638	0.688457	1	5673	tags=47%, list=41%, signal=79%
GO_REGULATION_OF_DEFENSE_RESPONSE_TO_VIRUS_BY_HOST	24	0.174884	1.01918	0.406312	0.688604	1	7360	tags=71%, list=53%, signal=152%
GO_MIDBODY_ABSCISSION	16	0.212713	1.01855	0.432806	0.689262	1	9136	tags=88%, list=66%, signal=259%
GO_TRANSCRIPTION_COUPLED_NUCLEOTIDE_EXCISION_REPAIR	71	0.103283	1.01734	0.418327	0.691127	1	11596	tags=94%, list=84%, signal=590%
GO_GLUCAN_METABOLIC_PROCESS	60	0.110895	1.017	0.411881	0.691235	1	3533	tags=37%, list=26%, signal=49%
GO_NUCLEAR_TRANSCRIBED_MRNA_POLY_A_TAIL_SHORTENING	28	0.160557	1.01671	0.435897	0.691239	1	1237	tags=25%, list=9%, signal=27%
GO_PROTEIN_K63_LINKED_UBIQUITINATION	44	0.130777	1.01642	0.418919	0.691206	1	6037	tags=57%, list=44%, signal=101%
GO_ENDOTHELIAL_CELL_CHEMOTAXIS	23	0.17703	1.01555	0.440882	0.692382	1	7755	tags=74%, list=56%, signal=169%
GO_RESPONSE_TO_IMMOBILIZATION_STRESS	19	0.196008	1.0153	0.423077	0.692279	1	4558	tags=53%, list=33%, signal=79%
GO_LUNG_ALVEOLUS_DEVELOPMENT	32	0.14947	1.01519	0.408714	0.691907	1	3976	tags=44%, list=29%, signal=61%
GO_REGULATION_OF_SMAD_PROTEIN_SIGNAL_TRANSDUCTION	16	0.214483	1.01451	0.424893	0.692706	1	3940	tags=50%, list=29%, signal=70%
GO_MULTICELLULAR_ORGANISMAL_MOVEMENT	43	0.131087	1.01451	0.404715	0.692114	1	7177	tags=65%, list=52%, signal=135%
GO_REGULATION_OF_RYANODINE_SENSITIVE_CALCIUM_RELEASE_CHANNEL_ACTIVITY	24	0.175583	1.01418	0.419422	0.69216	1	7925	tags=75%, list=57%, signal=176%
GO_EMBRYONIC_ORGAN_MORPHOGENESIS	207	0.0613904	1.0141	0.439583	0.691735	1	1830	tags=19%, list=13%, signal=22%
GO_CENTROMERE_COMPLEX_ASSEMBLY	39	0.139879	1.01307	0.434263	0.69314	1	3026	tags=36%, list=22%, signal=46%
GO_BRAIN_MORPHOGENESIS	27	0.166045	1.01261	0.425963	0.693483	1	5886	tags=59%, list=43%, signal=103%
GO_NEGATIVE_REGULATION_OF_REGULATED_SECRETORY_PATHWAY	21	0.186524	1.01209	0.416988	0.693949	1	7938	tags=76%, list=58%, signal=179%
GO_INTRINSIC_APOPTOTIC_SIGNALING_PATHWAY_IN_RESPONSE_TO_DNA_DAMAGE	96	0.0879838	1.0109	0.435798	0.695752	1	4253	tags=40%, list=31%, signal=57%
GO_RESPONSE_TO_INTERFERON_GAMMA	138	0.0748809	1.01083	0.404624	0.695333	1	9170	tags=74%, list=66%, signal=218%
GO_GASTRULATION_WITH_MOUTH_FORMING_SECOND	21	0.187561	1.01013	0.416834	0.696139	1	7267	tags=71%, list=53%, signal=151%
GO_REGULATION_OF_REACTIVE_OXYGEN_SPECIES_BIOSYNTHETIC_PROCESS	67	0.106822	1.01003	0.446655	0.695749	1	1003	tags=18%, list=7%, signal=19%
GO_RESPONSE_TO_CATECHOLAMINE	33	0.148601	1.00979	0.432271	0.695645	1	5059	tags=52%, list=37%, signal=81%
GO_RHO_PROTEIN_SIGNAL_TRANSDUCTION	177	0.0633334	1.0093	0.430894	0.695986	1	5370	tags=45%, list=39%, signal=73%
GO_RNA_CAPPING	32	0.151249	1.00833	0.412791	0.697337	1	11278	tags=97%, list=82%, signal=530%
GO_REGULATION_OF_TRANSLATION_IN_RESPONSE_TO_STRESS	18	0.199218	1.00754	0.431818	0.698305	1	5683	tags=61%, list=41%, signal=104%
GO_NEGATIVE_REGULATION_OF_PRODUCTION_OF_MOLECULAR_MEDIATOR_OF_IMMUNE_RESPONSE	19	0.190004	1.0068	0.407098	0.699219	1	3189	tags=42%, list=23%, signal=55%
GO_DE_NOVO_PROTEIN_FOLDING	37	0.141457	1.00595	0.434263	0.700365	1	5508	tags=54%, list=40%, signal=90%
GO_POSITIVE_REGULATION_OF_PROTEIN_ACETYLATION	36	0.139907	1.00592	0.424658	0.699818	1	4587	tags=47%, list=33%, signal=71%
GO_APICAL_JUNCTION_ASSEMBLY	53	0.1166	1.00531	0.43222	0.700464	1	6984	tags=62%, list=51%, signal=126%
GO_REGULATION_OF_PROGRAMMED_NECROTIC_CELL_DEATH	16	0.206874	1.0051	0.45	0.700291	1	1459	tags=31%, list=11%, signal=35%
GO_REGULATION_OF_EXTRINSIC_APOPTOTIC_SIGNALING_PATHWAY_VIA_DEATH_DOMAIN_RECEPTORS	48	0.124272	1.00344	0.431683	0.703084	1	9209	tags=79%, list=67%, signal=237%
GO_REGULATION_OF_ERYTHROCYTE_DIFFERENTIATION	40	0.13547	1.00245	0.437882	0.704464	1	2963	tags=35%, list=21%, signal=44%
GO_METAPHASE_ANAPHASE_TRANSITION_OF_CELL_CYCLE	53	0.11781	1.00198	0.429961	0.704866	1	7748	tags=68%, list=56%, signal=154%
GO_ARTERY_DEVELOPMENT	73	0.102047	1.00191	0.434694	0.704426	1	5778	tags=52%, list=42%, signal=89%
GO_POSITIVE_T_CELL_SELECTION	21	0.186399	1.00139	0.449187	0.704871	1	2686	tags=38%, list=19%, signal=47%
GO_PRODUCTION_OF_MOLECULAR_MEDIATOR_OF_IMMUNE_RESPONSE	127	0.0760467	0.999831	0.453192	0.707447	1	9276	tags=75%, list=67%, signal=226%
GO_REGULATION_OF_RAS_PROTEIN_SIGNAL_TRANSDUCTION	209	0.0599065	0.99893	0.441683	0.708738	1	5388	tags=45%, list=39%, signal=73%
GO_POSITIVE_REGULATION_OF_ACTIN_CYTOSKELETON_REORGANIZATION	17	0.203525	0.998401	0.456175	0.709124	1	5308	tags=59%, list=38%, signal=96%
GO_FORELIMB_MORPHOGENESIS	30	0.152206	0.998338	0.44902	0.708661	1	4800	tags=50%, list=35%, signal=77%
GO_NEURAL_TUBE_PATTERNING	32	0.152677	0.996631	0.455598	0.711535	1	2208	tags=31%, list=16%, signal=37%
GO_ENDOCRINE_SYSTEM_DEVELOPMENT	86	0.0930207	0.996026	0.430451	0.712219	1	1771	tags=22%, list=13%, signal=25%
GO_MUSCLE_CELL_APOPTOTIC_PROCESS	54	0.113582	0.995884	0.441237	0.711912	1	1248	tags=20%, list=9%, signal=22%
GO_NEGATIVE_REGULATION_OF_PEPTIDYL_TYROSINE_PHOSPHORYLATION	46	0.125522	0.995604	0.438247	0.711857	1	5469	tags=52%, list=40%, signal=86%
GO_REGULATION_OF_AMYLOID_BETA_FORMATION	22	0.179319	0.994604	0.424628	0.713286	1	1918	tags=32%, list=14%, signal=37%
GO_TISSUE_MIGRATION	245	0.0548402	0.993514	0.446985	0.714892	1	3309	tags=29%, list=24%, signal=38%
GO_VASCULAR_ENDOTHELIAL_GROWTH_FACTOR_PRODUCTION	25	0.16677	0.993253	0.452675	0.71482	1	2668	tags=36%, list=19%, signal=45%
GO_CELL_RECOGNITION	102	0.0832957	0.992375	0.450304	0.716014	1	4267	tags=39%, list=31%, signal=56%
GO_SYNAPTIC_TRANSMISSION_DOPAMINERGIC	20	0.181378	0.992291	0.446154	0.715593	1	949	tags=25%, list=7%, signal=27%
GO_REGULATION_OF_UBIQUITIN_DEPENDENT_PROTEIN_CATABOLIC_PROCESS	137	0.0728762	0.992155	0.440574	0.715292	1	10681	tags=85%, list=77%, signal=372%
GO_HEMATOPOIETIC_STEM_CELL_PROLIFERATION	21	0.182094	0.991741	0.455426	0.715542	1	3402	tags=43%, list=25%, signal=57%
GO_REGULATION_OF_PROTEIN_LOCALIZATION_TO_MEMBRANE	160	0.0687578	0.99146	0.442913	0.715519	1	4061	tags=36%, list=29%, signal=51%
GO_NEGATIVE_REGULATION_OF_EXTRINSIC_APOPTOTIC_SIGNALING_PATHWAY	84	0.0946545	0.990755	0.446939	0.71627	1	9209	tags=76%, list=67%, signal=228%
GO_SIGNAL_TRANSDUCTION_IN_RESPONSE_TO_DNA_DAMAGE	121	0.0771297	0.990701	0.450902	0.715778	1	6467	tags=55%, list=47%, signal=102%
GO_GLUTAMINE_FAMILY_AMINO_ACID_METABOLIC_PROCESS	56	0.113053	0.990176	0.446764	0.716238	1	9282	tags=79%, list=67%, signal=239%
GO_DETECTION_OF_STIMULUS	173	0.064108	0.989477	0.441296	0.717094	1	4467	tags=39%, list=32%, signal=57%
GO_RESPONSE_TO_LEUKEMIA_INHIBITORY_FACTOR	89	0.089845	0.989259	0.447826	0.716907	1	2022	tags=24%, list=15%, signal=27%
GO_NEGATIVE_REGULATION_OF_MAP_KINASE_ACTIVITY	63	0.107441	0.989129	0.457661	0.716579	1	10126	tags=84%, list=73%, signal=315%
GO_STORE_OPERATED_CALCIUM_ENTRY	17	0.199357	0.989017	0.441423	0.716229	1	498	tags=24%, list=4%, signal=24%
GO_POSITIVE_REGULATION_OF_RNA_METABOLIC_PROCESS	62	0.105281	0.988814	0.439604	0.716032	1	2335	tags=27%, list=17%, signal=33%
GO_LYMPHOCYTE_APOPTOTIC_PROCESS	50	0.11583	0.988611	0.469307	0.715881	1	9716	tags=82%, list=70%, signal=277%
GO_REGULATION_OF_PROTEIN_EXPORT_FROM_NUCLEUS	38	0.136292	0.988532	0.474206	0.715476	1	5383	tags=53%, list=39%, signal=86%
GO_GLYCOSYLATION	222	0.0576394	0.988068	0.448413	0.715797	1	11020	tags=86%, list=80%, signal=419%
GO_POSITIVE_REGULATION_OF_MUSCLE_HYPERTROPHY	27	0.157674	0.986357	0.449187	0.718727	1	1915	tags=30%, list=14%, signal=34%
GO_INTERLEUKIN_17_PRODUCTION	17	0.199545	0.985939	0.455253	0.718967	1	9419	tags=88%, list=68%, signal=278%
GO_MUSCLE_FIBER_DEVELOPMENT	53	0.114608	0.985866	0.451546	0.718537	1	1547	tags=23%, list=11%, signal=25%
GO_NEUROTRANSMITTER_RECEPTOR_LOCALIZATION_TO_POSTSYNAPTIC_SPECIALIZATION_MEMBRANE	20	0.184965	0.985832	0.434783	0.718019	1	6416	tags=65%, list=47%, signal=121%
GO_POSTSYNAPSE_ORGANIZATION	153	0.0692241	0.98375	0.433663	0.721577	1	6987	tags=58%, list=51%, signal=115%
GO_REGULATION_OF_T_CELL_MIGRATION	26	0.163109	0.982313	0.486111	0.723823	1	6771	tags=65%, list=49%, signal=128%
GO_APOPTOTIC_DNA_FRAGMENTATION	21	0.177747	0.981525	0.469062	0.724783	1	10029	tags=90%, list=73%, signal=331%
GO_I_KAPPAB_PHOSPHORYLATION	18	0.193289	0.980586	0.454191	0.726054	1	2700	tags=39%, list=20%, signal=48%
GO_ANTIGEN_RECEPTOR_MEDIATED_SIGNALING_PATHWAY	182	0.0632969	0.979747	0.464627	0.727176	1	11110	tags=87%, list=81%, signal=441%
GO_POSITIVE_REGULATION_OF_TOLL_LIKE_RECEPTOR_SIGNALING_PATHWAY	20	0.177463	0.979287	0.469008	0.727486	1	2382	tags=35%, list=17%, signal=42%
GO_ESTABLISHMENT_OF_PROTEIN_LOCALIZATION_TO_MITOCHONDRIAL_MEMBRANE	18	0.19468	0.978241	0.446429	0.729051	1	8044	tags=78%, list=58%, signal=186%
GO_NEGATIVE_REGULATION_OF_PROTEIN_LOCALIZATION_TO_CELL_PERIPHERY	21	0.177809	0.977073	0.459514	0.730739	1	3461	tags=43%, list=25%, signal=57%
GO_CHOLESTEROL_EFFLUX	24	0.164678	0.976356	0.466797	0.731618	1	5202	tags=54%, list=38%, signal=87%
GO_NEGATIVE_REGULATION_OF_TRANSLATIONAL_INITIATION	18	0.193119	0.975937	0.478261	0.731855	1	5767	tags=61%, list=42%, signal=105%
GO_NEGATIVE_REGULATION_OF_MYELOID_CELL_DIFFERENTIATION	61	0.104774	0.975228	0.463362	0.732723	1	5569	tags=51%, list=40%, signal=85%
GO_DENDRITIC_SPINE_MORPHOGENESIS	54	0.112094	0.975078	0.472112	0.732431	1	6887	tags=61%, list=50%, signal=122%
GO_ACTIVATION_OF_IMMUNE_RESPONSE	440	0.0401995	0.974992	0.460348	0.732012	1	12313	tags=93%, list=89%, signal=842%
GO_RESPONSE_TO_GAMMA_RADIATION	50	0.117497	0.974649	0.477228	0.732141	1	8314	tags=72%, list=60%, signal=181%
GO_SMOOTH_MUSCLE_CONTRACTION	83	0.0921729	0.974441	0.472837	0.731989	1	1394	tags=19%, list=10%, signal=21%
GO_POSITIVE_REGULATION_OF_SMOOTH_MUSCLE_CONTRACTION	23	0.169587	0.972723	0.447423	0.734831	1	2461	tags=35%, list=18%, signal=42%
GO_3_UTR_MEDIATED_MRNA_STABILIZATION	15	0.202642	0.972512	0.472973	0.734666	1	5482	tags=60%, list=40%, signal=99%
GO_NEGATIVE_REGULATION_OF_CELL_AGING	22	0.173361	0.971311	0.472763	0.736458	1	11403	tags=100%, list=83%, signal=577%
GO_REACTIVE_OXYGEN_SPECIES_BIOSYNTHETIC_PROCESS	80	0.0923091	0.97102	0.464844	0.73644	1	802	tags=15%, list=6%, signal=16%
GO_FILOPODIUM_ASSEMBLY	54	0.112583	0.970773	0.484064	0.736348	1	8668	tags=74%, list=63%, signal=199%
GO_PEPTIDYL_THREONINE_DEPHOSPHORYLATION	16	0.203557	0.970287	0.453988	0.736701	1	10986	tags=100%, list=80%, signal=491%
GO_VIRAL_RNA_GENOME_REPLICATION	21	0.170619	0.969257	0.485887	0.738224	1	8157	tags=76%, list=59%, signal=186%
GO_POSITIVE_REGULATION_OF_I_KAPPAB_KINASE_NF_KAPPAB_SIGNALING	147	0.0679359	0.968733	0.462136	0.738701	1	3200	tags=30%, list=23%, signal=39%
GO_ORGANIC_HYDROXY_COMPOUND_BIOSYNTHETIC_PROCESS	199	0.0605078	0.967715	0.478088	0.740198	1	4790	tags=41%, list=35%, signal=61%
GO_REGULATION_OF_LIPASE_ACTIVITY	67	0.100827	0.967661	0.482	0.739713	1	5202	tags=48%, list=38%, signal=76%
GO_REGULATION_OF_NON_CANONICAL_WNT_SIGNALING_PATHWAY	20	0.17681	0.966479	0.467308	0.741544	1	2391	tags=35%, list=17%, signal=42%
GO_NEGATIVE_REGULATION_OF_CELLULAR_PROTEIN_CATABOLIC_PROCESS	75	0.0961067	0.966274	0.464567	0.74136	1	10633	tags=87%, list=77%, signal=376%
GO_POSITIVE_REGULATION_OF_LEUKOCYTE_PROLIFERATION	94	0.0854753	0.965614	0.475472	0.742068	1	8658	tags=71%, list=63%, signal=190%
GO_VASCULAR_ENDOTHELIAL_GROWTH_FACTOR_RECEPTOR_SIGNALING_PATHWAY	89	0.0863714	0.965362	0.488889	0.741963	1	675	tags=13%, list=5%, signal=14%
GO_FACE_DEVELOPMENT	46	0.120504	0.96453	0.480769	0.743083	1	7037	tags=63%, list=51%, signal=128%
GO_LIVER_REGENERATION	27	0.157343	0.9643	0.493952	0.742995	1	10092	tags=89%, list=73%, signal=331%
GO_PROTEIN_QUALITY_CONTROL_FOR_MISFOLDED_OR_INCOMPLETELY_SYNTHESIZED_PROTEINS	25	0.161781	0.964176	0.485089	0.742647	1	9908	tags=88%, list=72%, signal=312%
GO_REGULATION_OF_ACTIN_FILAMENT_BUNDLE_ASSEMBLY	82	0.0899178	0.963934	0.476378	0.74256	1	5830	tags=51%, list=42%, signal=88%
GO_REGULATION_OF_LIPOPOLYSACCHARIDE_MEDIATED_SIGNALING_PATHWAY	18	0.186791	0.963515	0.49901	0.74282	1	9685	tags=89%, list=70%, signal=298%
GO_LEUKOCYTE_MEDIATED_CYTOTOXICITY	58	0.106212	0.96337	0.513185	0.742527	1	6387	tags=57%, list=46%, signal=106%
GO_POSITIVE_REGULATION_OF_VIRAL_PROCESS	94	0.0844221	0.963156	0.487078	0.742368	1	8379	tags=69%, list=61%, signal=175%
GO_MAMMARY_GLAND_MORPHOGENESIS	37	0.133917	0.962951	0.515275	0.7422	1	9339	tags=81%, list=68%, signal=250%
GO_ANTIGEN_PROCESSING_AND_PRESENTATION_OF_PEPTIDE_ANTIGEN_VIA_MHC_CLASS_I	86	0.0879521	0.962885	0.484064	0.741746	1	6972	tags=59%, list=51%, signal=119%
GO_REGULATION_OF_TYPE_I_INTERFERON_MEDIATED_SIGNALING_PATHWAY	27	0.157916	0.962689	0.462745	0.741556	1	8041	tags=74%, list=58%, signal=177%
GO_IRE1_MEDIATED_UNFOLDED_PROTEIN_RESPONSE	61	0.102543	0.962565	0.514223	0.741225	1	12156	tags=98%, list=88%, signal=826%
GO_METANEPHRIC_NEPHRON_DEVELOPMENT	30	0.148151	0.962325	0.476562	0.741173	1	7614	tags=70%, list=55%, signal=156%
GO_LEUKOCYTE_ACTIVATION_INVOLVED_IN_INFLAMMATORY_RESPONSE	27	0.152604	0.962179	0.490798	0.740875	1	6071	tags=59%, list=44%, signal=106%
GO_RECEPTOR_LOCALIZATION_TO_SYNAPSE	52	0.114969	0.962039	0.501048	0.740568	1	6641	tags=60%, list=48%, signal=115%
GO_SMOOTH_MUSCLE_CELL_PROLIFERATION	118	0.0765228	0.961351	0.491968	0.74131	1	3277	tags=31%, list=24%, signal=41%
GO_VASCULAR_ASSOCIATED_SMOOTH_MUSCLE_CELL_MIGRATION	21	0.172943	0.959876	0.477707	0.743816	1	3528	tags=43%, list=26%, signal=58%
GO_NEGATIVE_REGULATION_OF_STRESS_ACTIVATED_PROTEIN_KINASE_SIGNALING_CASCADE	37	0.131437	0.957267	0.505133	0.748493	1	6764	tags=62%, list=49%, signal=122%
GO_CELLULAR_RESPONSE_TO_DSRNA	18	0.190155	0.956842	0.476954	0.748763	1	1977	tags=33%, list=14%, signal=39%
GO_HISTONE_H2A_UBIQUITINATION	24	0.169609	0.956778	0.477912	0.748314	1	6858	tags=67%, list=50%, signal=132%
GO_BODY_MORPHOGENESIS	46	0.117363	0.956633	0.481113	0.748029	1	8879	tags=76%, list=64%, signal=213%
GO_POSITIVE_REGULATION_OF_KINASE_ACTIVITY	486	0.038176	0.955031	0.501006	0.750649	1	9735	tags=74%, list=71%, signal=244%
GO_REPLACEMENT_OSSIFICATION	26	0.156232	0.954944	0.489837	0.750242	1	1031	tags=23%, list=7%, signal=25%
GO_PRESYNAPSE_ORGANIZATION	41	0.127017	0.954737	0.486922	0.750056	1	3298	tags=37%, list=24%, signal=48%
GO_REGULATION_OF_VIRAL_GENOME_REPLICATION	62	0.101858	0.954602	0.492958	0.749723	1	2382	tags=27%, list=17%, signal=33%
GO_REGULATION_OF_SYNAPTIC_TRANSMISSION_GLUTAMATERGIC	62	0.105649	0.954109	0.49375	0.750096	1	3887	tags=39%, list=28%, signal=54%
GO_METANEPHRIC_NEPHRON_MORPHOGENESIS	19	0.184925	0.953496	0.493878	0.75072	1	7614	tags=74%, list=55%, signal=164%
GO_HEART_MORPHOGENESIS	203	0.0565756	0.953423	0.494929	0.750292	1	4801	tags=40%, list=35%, signal=61%
GO_ENDOTHELIUM_DEVELOPMENT	104	0.0781778	0.952853	0.483366	0.750898	1	3968	tags=37%, list=29%, signal=51%
GO_RAS_PROTEIN_SIGNAL_TRANSDUCTION	392	0.0412561	0.951483	0.509395	0.753006	1	5427	tags=43%, list=39%, signal=69%
GO_REGULATION_OF_ACTIN_FILAMENT_BASED_PROCESS	329	0.0453662	0.951479	0.51068	0.752423	1	6682	tags=53%, list=48%, signal=100%
GO_REGULATION_OF_RHO_PROTEIN_SIGNAL_TRANSDUCTION	119	0.0733198	0.951048	0.489316	0.752699	1	4907	tags=43%, list=36%, signal=66%
GO_TYROSINE_PHOSPHORYLATION_OF_STAT_PROTEIN	49	0.117514	0.950497	0.498062	0.753194	1	4576	tags=45%, list=33%, signal=67%
GO_EPITHELIAL_STRUCTURE_MAINTENANCE	18	0.186839	0.949378	0.516129	0.754845	1	8152	tags=78%, list=59%, signal=190%
GO_OLFACTORY_LOBE_DEVELOPMENT	28	0.145592	0.948681	0.512605	0.755638	1	8831	tags=79%, list=64%, signal=218%
GO_POSITIVE_REGULATION_OF_EXTRINSIC_APOPTOTIC_SIGNALING_PATHWAY_VIA_DEATH_DOMAIN_RECEPTORS	16	0.193639	0.948676	0.510242	0.755055	1	5951	tags=63%, list=43%, signal=110%
GO_CELL_CYCLE_G1_S_PHASE_TRANSITION	236	0.053091	0.948561	0.507968	0.754684	1	8337	tags=66%, list=60%, signal=163%
GO_DEVELOPMENT_OF_PRIMARY_SEXUAL_CHARACTERISTICS	169	0.0626992	0.948463	0.496894	0.754296	1	1185	tags=15%, list=9%, signal=16%
GO_BONE_MORPHOGENESIS	88	0.0881998	0.947896	0.517787	0.754852	1	1768	tags=22%, list=13%, signal=25%
GO_SYNAPTIC_VESICLE_CYTOSKELETAL_TRANSPORT	18	0.191583	0.94785	0.488636	0.754342	1	9619	tags=89%, list=70%, signal=293%
GO_RENAL_WATER_HOMEOSTASIS	27	0.152919	0.947663	0.536585	0.754122	1	7599	tags=70%, list=55%, signal=156%
GO_ACTIVATION_OF_GTPASE_ACTIVITY	74	0.0933188	0.947556	0.504237	0.753771	1	6919	tags=59%, list=50%, signal=119%
GO_TERMINATION_OF_RNA_POLYMERASE_II_TRANSCRIPTION	34	0.136489	0.947212	0.503937	0.75386	1	9073	tags=79%, list=66%, signal=232%
GO_SOMITOGENESIS	53	0.11246	0.947146	0.5	0.753398	1	4699	tags=45%, list=34%, signal=68%
GO_POSTSYNAPTIC_SPECIALIZATION_ASSEMBLY	22	0.167669	0.946792	0.521569	0.753509	1	3959	tags=45%, list=29%, signal=64%
GO_AXONAL_TRANSPORT	53	0.110649	0.946749	0.53229	0.753029	1	8627	tags=74%, list=63%, signal=196%
GO_MODULATION_OF_TRANSCRIPTION_IN_OTHER_ORGANISM_INVOLVED_IN_SYMBIOTIC_INTERACTION	23	0.163738	0.946458	0.515504	0.753026	1	7938	tags=74%, list=58%, signal=174%
GO_NEGATIVE_REGULATION_OF_RECEPTOR_SIGNALING_PATHWAY_VIA_STAT	19	0.183412	0.945644	0.522417	0.754035	1	6909	tags=68%, list=50%, signal=137%
GO_REGULATION_OF_CELL_ACTIVATION	389	0.0434983	0.945155	0.501048	0.75445	1	6152	tags=49%, list=45%, signal=86%
GO_RNA_PHOSPHODIESTER_BOND_HYDROLYSIS_ENDONUCLEOLYTIC	64	0.100239	0.944399	0.5	0.75537	1	5734	tags=52%, list=42%, signal=88%
GO_REGULATION_OF_NEUROLOGICAL_SYSTEM_PROCESS	110	0.0770299	0.944154	0.521825	0.755269	1	575	tags=12%, list=4%, signal=12%
GO_REGULATION_OF_CENTROSOME_DUPLICATION	40	0.124631	0.943994	0.539961	0.755015	1	9318	tags=80%, list=68%, signal=246%
GO_POSITIVE_REGULATION_OF_MORPHOGENESIS_OF_AN_EPITHELIUM	24	0.156107	0.943709	0.503984	0.755002	1	5320	tags=54%, list=39%, signal=88%
GO_REGULATION_OF_MUSCLE_ORGAN_DEVELOPMENT	111	0.0761005	0.942911	0.505092	0.755988	1	2561	tags=26%, list=19%, signal=32%
GO_ISOPRENOID_BIOSYNTHETIC_PROCESS	18	0.187747	0.942188	0.510989	0.756821	1	5841	tags=61%, list=42%, signal=106%
GO_ALPHA_BETA_T_CELL_ACTIVATION	99	0.0797789	0.941812	0.494949	0.757042	1	9633	tags=78%, list=70%, signal=256%
GO_T_CELL_MIGRATION	37	0.133123	0.941313	0.524462	0.757418	1	7859	tags=70%, list=57%, signal=163%
GO_POSITIVE_REGULATION_OF_CELL_CYCLE_ARREST	74	0.0947976	0.940403	0.548902	0.758684	1	8576	tags=72%, list=62%, signal=188%
GO_POSITIVE_REGULATION_OF_LEUKOCYTE_APOPTOTIC_PROCESS	19	0.183098	0.94038	0.537109	0.758146	1	8365	tags=79%, list=61%, signal=200%
GO_G_PROTEIN_COUPLED_ACETYLCHOLINE_RECEPTOR_SIGNALING_PATHWAY	17	0.190205	0.940292	0.502049	0.757738	1	3869	tags=47%, list=28%, signal=65%
GO_SPERM_EGG_RECOGNITION	26	0.155375	0.938866	0.519916	0.760008	1	10060	tags=88%, list=73%, signal=326%
GO_NITRIC_OXIDE_SYNTHASE_BIOSYNTHETIC_PROCESS	15	0.207607	0.938391	0.517442	0.760343	1	1736	tags=33%, list=13%, signal=38%
GO_LIPID_PHOSPHORYLATION	60	0.10453	0.937698	0.516461	0.761155	1	7298	tags=63%, list=53%, signal=134%
GO_GLUTAMINE_FAMILY_AMINO_ACID_CATABOLIC_PROCESS	22	0.170551	0.937626	0.527132	0.760724	1	785	tags=23%, list=6%, signal=24%
GO_RESPONSE_TO_PAIN	23	0.164705	0.937057	0.523046	0.761257	1	1329	tags=26%, list=10%, signal=29%
GO_PROTEIN_TRANSPORT_WITHIN_LIPID_BILAYER	51	0.108554	0.936317	0.537678	0.762142	1	6079	tags=55%, list=44%, signal=98%
GO_VASCULAR_PROCESS_IN_CIRCULATORY_SYSTEM	127	0.0705527	0.936277	0.515936	0.761651	1	3270	tags=31%, list=24%, signal=40%
GO_SKELETAL_MUSCLE_TISSUE_REGENERATION	23	0.157283	0.936133	0.540434	0.761344	1	3230	tags=39%, list=23%, signal=51%
GO_REPLICATION_FORK_PROCESSING	29	0.142674	0.935805	0.528112	0.761428	1	7071	tags=66%, list=51%, signal=134%
GO_POSITIVE_REGULATION_OF_TOR_SIGNALING	34	0.135852	0.934313	0.534137	0.763842	1	9893	tags=85%, list=72%, signal=301%
GO_SENSORY_PERCEPTION_OF_PAIN	75	0.0913794	0.933936	0.53719	0.763999	1	2791	tags=29%, list=20%, signal=37%
GO_POSITIVE_REGULATION_OF_CYTOSOLIC_CALCIUM_ION_CONCENTRATION_INVOLVED_IN_PHOSPHOLIPASE_C_ACTIVATING_G_PROTEIN_COUPLED_SIGNALING_PATHWAY	22	0.162305	0.933663	0.529652	0.763962	1	3406	tags=41%, list=25%, signal=54%
GO_NEGATIVE_REGULATION_OF_FIBROBLAST_PROLIFERATION	27	0.154396	0.933317	0.516598	0.764033	1	4514	tags=48%, list=33%, signal=71%
GO_ENDOCHONDRAL_BONE_MORPHOGENESIS	62	0.102377	0.933116	0.534447	0.763861	1	1930	tags=24%, list=14%, signal=28%
GO_NEGATIVE_CHEMOTAXIS	41	0.125439	0.931816	0.490835	0.765828	1	6347	tags=59%, list=46%, signal=108%
GO_CELL_FATE_COMMITMENT_INVOLVED_IN_FORMATION_OF_PRIMARY_GERM_LAYER	19	0.179143	0.931273	0.526096	0.766338	1	10597	tags=95%, list=77%, signal=408%
GO_NEGATIVE_REGULATION_OF_SPROUTING_ANGIOGENESIS	23	0.160962	0.930393	0.536145	0.767526	1	6777	tags=65%, list=49%, signal=128%
GO_REGULATION_OF_CELL_CYCLE_ARREST	97	0.0823695	0.930241	0.547718	0.767252	1	9392	tags=76%, list=68%, signal=237%
GO_REGULATION_OF_B_CELL_RECEPTOR_SIGNALING_PATHWAY	20	0.173317	0.929788	0.53012	0.767586	1	1060	tags=25%, list=8%, signal=27%
GO_STRIATUM_DEVELOPMENT	19	0.175421	0.929319	0.541833	0.767918	1	2664	tags=37%, list=19%, signal=46%
GO_POSITIVE_REGULATION_OF_NIK_NF_KAPPAB_SIGNALING	60	0.100936	0.927831	0.551793	0.770335	1	4819	tags=45%, list=35%, signal=69%
GO_NEGATIVE_REGULATION_OF_PROTEIN_MODIFICATION_BY_SMALL_PROTEIN_CONJUGATION_OR_REMOVAL	75	0.0909916	0.927482	0.515504	0.77044	1	4819	tags=44%, list=35%, signal=67%
GO_POSTSYNAPTIC_MEMBRANE_ORGANIZATION	35	0.13485	0.927406	0.523622	0.770006	1	11935	tags=100%, list=87%, signal=741%
GO_NEGATIVE_REGULATION_OF_PEPTIDYL_THREONINE_PHOSPHORYLATION	17	0.187502	0.927168	0.517787	0.769894	1	3095	tags=41%, list=22%, signal=53%
GO_REGULATION_OF_CALCIUM_ION_TRANSPORT	185	0.0597491	0.927008	0.528226	0.769657	1	4777	tags=41%, list=35%, signal=61%
GO_EXCITATORY_SYNAPSE_ASSEMBLY	25	0.153134	0.926394	0.524752	0.770254	1	3959	tags=44%, list=29%, signal=62%
GO_CONNECTIVE_TISSUE_DEVELOPMENT	208	0.0555499	0.92609	0.510163	0.770249	1	4615	tags=39%, list=33%, signal=58%
GO_AMINE_METABOLIC_PROCESS	110	0.0742988	0.925666	0.540076	0.770511	1	6881	tags=57%, list=50%, signal=113%
GO_SUBSTRATE_ADHESION_DEPENDENT_CELL_SPREADING	79	0.0887692	0.925289	0.517958	0.770679	1	6812	tags=58%, list=49%, signal=114%
GO_REGULATION_OF_DNA_DAMAGE_CHECKPOINT	16	0.194991	0.925216	0.538922	0.770252	1	11104	tags=100%, list=81%, signal=513%
GO_ANTIGEN_PROCESSING_AND_PRESENTATION_OF_EXOGENOUS_PEPTIDE_ANTIGEN_VIA_MHC_CLASS_I	71	0.093007	0.924941	0.519833	0.770214	1	6881	tags=59%, list=50%, signal=117%
GO_REGULATION_OF_SPINDLE_ASSEMBLY	27	0.15258	0.924884	0.521654	0.769759	1	9136	tags=81%, list=66%, signal=241%
GO_NITRIC_OXIDE_MEDIATED_SIGNAL_TRANSDUCTION	23	0.158446	0.92439	0.539652	0.770149	1	3214	tags=39%, list=23%, signal=51%
GO_NEGATIVE_REGULATION_OF_PHOSPHORYLATION	371	0.0422413	0.923698	0.537074	0.770956	1	6086	tags=48%, list=44%, signal=84%
GO_TELENCEPHALON_GLIAL_CELL_MIGRATION	21	0.163876	0.923358	0.565891	0.771047	1	1026	tags=24%, list=7%, signal=26%
GO_PROTEIN_LOCALIZATION_TO_KINETOCHORE	16	0.193221	0.922801	0.528376	0.771567	1	2509	tags=38%, list=18%, signal=46%
GO_DIENCEPHALON_DEVELOPMENT	56	0.103543	0.922682	0.537285	0.771216	1	4241	tags=41%, list=31%, signal=59%
GO_REGULATION_OF_B_CELL_MEDIATED_IMMUNITY	32	0.141376	0.922677	0.52795	0.770653	1	9259	tags=81%, list=67%, signal=247%
GO_POSITIVE_REGULATION_OF_CALCIUM_ION_TRANSPORT_INTO_CYTOSOL	41	0.123198	0.920697	0.520243	0.773992	1	8396	tags=73%, list=61%, signal=186%
GO_POSITIVE_REGULATION_OF_SMOOTH_MUSCLE_CELL_MIGRATION	33	0.135042	0.920321	0.535934	0.774179	1	3156	tags=36%, list=23%, signal=47%
GO_NEGATIVE_REGULATION_OF_IMMUNE_EFFECTOR_PROCESS	79	0.0868176	0.920167	0.556436	0.773899	1	11203	tags=90%, list=81%, signal=476%
GO_INTRINSIC_APOPTOTIC_SIGNALING_PATHWAY_IN_RESPONSE_TO_DNA_DAMAGE_BY_P53_CLASS_MEDIATOR	42	0.121614	0.920031	0.511719	0.773609	1	3909	tags=40%, list=28%, signal=56%
GO_POSITIVE_REGULATION_OF_LEUKOCYTE_DIFFERENTIATION	113	0.0743407	0.919947	0.516598	0.773179	1	6793	tags=57%, list=49%, signal=111%
GO_REGULATION_OF_LEUKOCYTE_DIFFERENTIATION	201	0.0570579	0.91929	0.559454	0.773906	1	6222	tags=51%, list=45%, signal=91%
GO_DEVELOPMENTAL_CELL_GROWTH	201	0.0559498	0.919192	0.560784	0.773516	1	1297	tags=15%, list=9%, signal=16%
GO_POSITIVE_REGULATION_OF_EXTRINSIC_APOPTOTIC_SIGNALING_PATHWAY	48	0.111943	0.918454	0.532091	0.774431	1	6218	tags=56%, list=45%, signal=102%
GO_ANGIOGENESIS_INVOLVED_IN_WOUND_HEALING	19	0.174248	0.918418	0.569138	0.773927	1	3406	tags=42%, list=25%, signal=56%
GO_NEGATIVE_REGULATION_OF_INTERFERON_GAMMA_PRODUCTION	17	0.183961	0.917303	0.564103	0.77552	1	3955	tags=47%, list=29%, signal=66%
GO_REGULATION_OF_DOUBLE_STRAND_BREAK_REPAIR	61	0.0982174	0.916412	0.547094	0.776717	1	8372	tags=70%, list=61%, signal=179%
GO_POSITIVE_REGULATION_OF_CYTOKINE_BIOSYNTHETIC_PROCESS	43	0.118221	0.915678	0.542094	0.777628	1	6071	tags=56%, list=44%, signal=99%
GO_REGULATION_OF_PRESYNAPSE_ORGANIZATION	29	0.140392	0.915323	0.543788	0.777736	1	3298	tags=38%, list=24%, signal=50%
GO_BONE_CELL_DEVELOPMENT	27	0.147632	0.91469	0.54386	0.778404	1	11758	tags=100%, list=85%, signal=677%
GO_POSITIVE_REGULATION_OF_LEUKOCYTE_CHEMOTAXIS	58	0.101429	0.914588	0.542308	0.778026	1	7166	tags=62%, list=52%, signal=129%
GO_REGULATION_OF_DEVELOPMENTAL_GROWTH	271	0.0472398	0.913826	0.538462	0.778987	1	1345	tags=14%, list=10%, signal=16%
GO_REGULATION_OF_MACROPHAGE_ACTIVATION	44	0.11651	0.91374	0.52381	0.778591	1	6860	tags=61%, list=50%, signal=122%
GO_BETA_CATENIN_DESTRUCTION_COMPLEX_DISASSEMBLY	18	0.177884	0.91311	0.553191	0.779242	1	2146	tags=33%, list=16%, signal=39%
GO_POSITIVE_REGULATION_OF_CELL_CYCLE_G1_S_PHASE_TRANSITION	44	0.115989	0.912784	0.553606	0.779324	1	5300	tags=50%, list=38%, signal=81%
GO_KIDNEY_MESENCHYME_DEVELOPMENT	15	0.191797	0.91246	0.557282	0.779388	1	4712	tags=53%, list=34%, signal=81%
GO_NEURON_FATE_COMMITMENT	43	0.117773	0.91236	0.551867	0.779012	1	5115	tags=49%, list=37%, signal=77%
GO_CELLULAR_PROCESS_INVOLVED_IN_REPRODUCTION_IN_MULTICELLULAR_ORGANISM	229	0.0524968	0.912308	0.555785	0.778538	1	8200	tags=65%, list=59%, signal=157%
GO_POSITIVE_REGULATION_OF_MITOTIC_CELL_CYCLE	135	0.0668977	0.912084	0.544898	0.778395	1	4704	tags=41%, list=34%, signal=61%
GO_REGULATION_OF_NUCLEAR_DIVISION	178	0.0595131	0.911268	0.551867	0.779409	1	10733	tags=84%, list=78%, signal=373%
GO_POSITIVE_REGULATION_OF_MITOTIC_SISTER_CHROMATID_SEGREGATION	15	0.199361	0.910655	0.568589	0.780025	1	2769	tags=40%, list=20%, signal=50%
GO_NEGATIVE_REGULATION_OF_RNA_CATABOLIC_PROCESS	46	0.113376	0.91032	0.56213	0.780098	1	8634	tags=74%, list=63%, signal=197%
GO_SOMITE_DEVELOPMENT	69	0.0944532	0.910088	0.547431	0.779975	1	4699	tags=43%, list=34%, signal=66%
GO_HOMOPHILIC_CELL_ADHESION_VIA_PLASMA_MEMBRANE_ADHESION_MOLECULES	146	0.0645271	0.907892	0.575099	0.783693	1	1480	tags=17%, list=11%, signal=19%
GO_REGULATION_OF_ANION_TRANSMEMBRANE_TRANSPORT	24	0.150632	0.906692	0.55668	0.78545	1	5970	tags=58%, list=43%, signal=103%
GO_SPINAL_CORD_MOTOR_NEURON_DIFFERENTIATION	20	0.170525	0.905994	0.554435	0.786239	1	1788	tags=30%, list=13%, signal=34%
GO_EXECUTION_PHASE_OF_APOPTOSIS	64	0.0966162	0.905938	0.572597	0.785767	1	9016	tags=75%, list=65%, signal=216%
GO_PROTEIN_TRANSPORT_WITHIN_PLASMA_MEMBRANE	43	0.117639	0.905375	0.58	0.78626	1	6079	tags=56%, list=44%, signal=99%
GO_EMBRYONIC_HINDLIMB_MORPHOGENESIS	23	0.15615	0.905168	0.555118	0.786064	1	2646	tags=35%, list=19%, signal=43%
GO_REGULATION_OF_ENDOCYTOSIS	169	0.0594205	0.904828	0.578337	0.786104	1	8982	tags=71%, list=65%, signal=201%
GO_PROTEIN_LOCALIZATION_TO_CILIUM	41	0.120701	0.904653	0.555336	0.785899	1	11794	tags=98%, list=86%, signal=672%
GO_POSITIVE_REGULATION_OF_ANIMAL_ORGAN_MORPHOGENESIS	57	0.100883	0.904568	0.55303	0.785497	1	5388	tags=49%, list=39%, signal=80%
GO_POSITIVE_REGULATION_OF_UBIQUITIN_DEPENDENT_PROTEIN_CATABOLIC_PROCESS	86	0.0821988	0.90415	0.570588	0.785719	1	4004	tags=37%, list=29%, signal=52%
GO_POSITIVE_REGULATION_OF_VIRAL_GENOME_REPLICATION	30	0.141727	0.904135	0.558594	0.785187	1	2186	tags=30%, list=16%, signal=36%
GO_REGULATION_OF_NUCLEAR_TRANSCRIBED_MRNA_CATABOLIC_PROCESS_DEADENYLATION_DEPENDENT_DECAY	17	0.183778	0.903737	0.544555	0.785365	1	5580	tags=59%, list=40%, signal=99%
GO_DETECTION_OF_BIOTIC_STIMULUS	18	0.17861	0.902586	0.566075	0.786977	1	6733	tags=67%, list=49%, signal=130%
GO_REGULATION_OF_DOUBLE_STRAND_BREAK_REPAIR_VIA_HOMOLOGOUS_RECOMBINATION	36	0.129529	0.902331	0.583665	0.786912	1	10476	tags=89%, list=76%, signal=369%
GO_NUCLEOTIDE_EXCISION_REPAIR_DNA_GAP_FILLING	23	0.159355	0.902159	0.565311	0.786702	1	11596	tags=100%, list=84%, signal=627%
GO_NEGATIVE_REGULATION_OF_ENDOCYTOSIS	34	0.131792	0.90093	0.561728	0.788593	1	8732	tags=76%, list=63%, signal=208%
GO_POSITIVE_REGULATION_OF_INSULIN_SECRETION	58	0.10152	0.900641	0.589641	0.788604	1	4787	tags=45%, list=35%, signal=68%
GO_ENDOTHELIAL_CELL_DEVELOPMENT	55	0.103622	0.900059	0.560928	0.789147	1	7101	tags=62%, list=51%, signal=127%
GO_REGULATION_OF_RECEPTOR_INTERNALIZATION	47	0.108769	0.898926	0.584493	0.790726	1	6720	tags=60%, list=49%, signal=116%
GO_LUNG_EPITHELIUM_DEVELOPMENT	28	0.14048	0.898632	0.561753	0.790734	1	3976	tags=43%, list=29%, signal=60%
GO_ENDOCARDIAL_CUSHION_MORPHOGENESIS	29	0.140236	0.898124	0.547131	0.791135	1	6629	tags=62%, list=48%, signal=119%
GO_PHENOL_CONTAINING_COMPOUND_BIOSYNTHETIC_PROCESS	31	0.133437	0.897935	0.538307	0.790949	1	1277	tags=23%, list=9%, signal=25%
GO_GLIAL_CELL_PROLIFERATION	38	0.121985	0.897653	0.551181	0.790941	1	4491	tags=45%, list=33%, signal=66%
GO_NEGATIVE_REGULATION_OF_CYSTEINE_TYPE_ENDOPEPTIDASE_ACTIVITY	71	0.0897384	0.897386	0.564706	0.790877	1	8674	tags=72%, list=63%, signal=193%
GO_TRANSCRIPTION_INITIATION_FROM_RNA_POLYMERASE_I_PROMOTER	33	0.13608	0.896337	0.589041	0.792373	1	11082	tags=94%, list=80%, signal=477%
GO_REGULATION_OF_PROTEIN_COMPLEX_ASSEMBLY	371	0.0403354	0.895648	0.566946	0.793093	1	9866	tags=75%, list=72%, signal=258%
GO_MODIFICATION_OF_MORPHOLOGY_OR_PHYSIOLOGY_OF_OTHER_ORGANISM_INVOLVED_IN_SYMBIOTIC_INTERACTION	78	0.0851466	0.895431	0.578035	0.79295	1	8379	tags=69%, list=61%, signal=175%
GO_IMMUNOGLOBULIN_PRODUCTION	67	0.0951063	0.895103	0.587426	0.793035	1	4663	tags=43%, list=34%, signal=65%
GO_ACTIVATION_OF_PROTEIN_KINASE_A_ACTIVITY	16	0.180926	0.894717	0.604124	0.793224	1	7850	tags=75%, list=57%, signal=174%
GO_POSITIVE_REGULATION_OF_HEART_GROWTH	31	0.133946	0.89462	0.57	0.79285	1	1270	tags=23%, list=9%, signal=25%
GO_CYTOKINETIC_PROCESS	37	0.121576	0.894163	0.568998	0.793187	1	9136	tags=78%, list=66%, signal=232%
GO_REGULATION_OF_T_CELL_MEDIATED_IMMUNITY	41	0.119065	0.893972	0.568826	0.79299	1	6771	tags=61%, list=49%, signal=119%
GO_PLASMA_MEMBRANE_TUBULATION	20	0.168895	0.893282	0.587398	0.79372	1	2500	tags=35%, list=18%, signal=43%
GO_CIRCADIAN_SLEEP_WAKE_CYCLE	18	0.174097	0.893257	0.589595	0.7932	1	1432	tags=28%, list=10%, signal=31%
GO_REGULATION_OF_ORGAN_GROWTH	75	0.0895538	0.893032	0.583501	0.793084	1	1345	tags=19%, list=10%, signal=21%
GO_NEGATIVE_REGULATION_OF_SYNAPSE_ORGANIZATION	21	0.166324	0.892876	0.577689	0.792803	1	1649	tags=29%, list=12%, signal=32%
GO_CHONDROCYTE_DIFFERENTIATION	98	0.07501	0.892687	0.574423	0.792577	1	2490	tags=26%, list=18%, signal=31%
GO_NEGATIVE_REGULATION_OF_REPRODUCTIVE_PROCESS	32	0.130169	0.892498	0.585657	0.792377	1	11999	tags=100%, list=87%, signal=768%
GO_REGULATION_OF_CARBOHYDRATE_CATABOLIC_PROCESS	71	0.0889973	0.892424	0.605996	0.791966	1	11792	tags=94%, list=86%, signal=648%
GO_REGULATION_OF_SPINDLE_ORGANIZATION	41	0.118306	0.891648	0.580392	0.792944	1	9136	tags=78%, list=66%, signal=231%
GO_RESPONSE_TO_ANGIOTENSIN	24	0.153056	0.891288	0.588694	0.793055	1	5362	tags=54%, list=39%, signal=88%
GO_NEGATIVE_REGULATION_OF_ENDOPLASMIC_RETICULUM_STRESS_INDUCED_INTRINSIC_APOPTOTIC_SIGNALING_PATHWAY	17	0.180387	0.890894	0.568507	0.793254	1	3193	tags=41%, list=23%, signal=54%
GO_REGULATION_OF_SKELETAL_MUSCLE_TISSUE_DEVELOPMENT	40	0.118922	0.888922	0.585657	0.796456	1	2501	tags=30%, list=18%, signal=37%
GO_NEGATIVE_REGULATION_OF_INTRINSIC_APOPTOTIC_SIGNALING_PATHWAY	88	0.0803507	0.888292	0.623932	0.797087	1	3286	tags=32%, list=24%, signal=42%
GO_HINDLIMB_MORPHOGENESIS	28	0.143047	0.888269	0.580645	0.796568	1	1478	tags=25%, list=11%, signal=28%
GO_RESPONSE_TO_MUSCLE_STRETCH	15	0.191028	0.887684	0.591837	0.797112	1	5642	tags=60%, list=41%, signal=101%
GO_STRESS_ACTIVATED_PROTEIN_KINASE_SIGNALING_CASCADE	259	0.0484506	0.887291	0.570866	0.797321	1	10685	tags=82%, list=77%, signal=358%
GO_INTERLEUKIN_7_MEDIATED_SIGNALING_PATHWAY	15	0.186847	0.887165	0.608787	0.797015	1	6619	tags=67%, list=48%, signal=128%
GO_POSITIVE_REGULATION_OF_PROTEIN_TYROSINE_KINASE_ACTIVITY	47	0.112399	0.886635	0.572874	0.797463	1	3149	tags=34%, list=23%, signal=44%
GO_POSITIVE_REGULATION_OF_SKELETAL_MUSCLE_TISSUE_DEVELOPMENT	19	0.174064	0.886292	0.595529	0.797575	1	1231	tags=26%, list=9%, signal=29%
GO_MAMMARY_GLAND_DEVELOPMENT	112	0.0708366	0.886115	0.588469	0.797369	1	7280	tags=60%, list=53%, signal=126%
GO_HETEROCHROMATIN_ORGANIZATION	15	0.189823	0.885151	0.591522	0.798689	1	6578	tags=67%, list=48%, signal=127%
GO_CEREBRAL_CORTEX_DEVELOPMENT	104	0.0744186	0.884747	0.577778	0.798881	1	2826	tags=28%, list=20%, signal=35%
GO_TORC1_SIGNALING	33	0.129003	0.884644	0.598425	0.798516	1	8254	tags=73%, list=60%, signal=181%
GO_HISTONE_H4_K5_ACETYLATION	16	0.184633	0.884267	0.583497	0.798682	1	6937	tags=69%, list=50%, signal=138%
GO_RESPONSE_TO_ESTROGEN	58	0.0994747	0.884099	0.586074	0.798422	1	1724	tags=22%, list=13%, signal=26%
GO_SYNAPSE_ORGANIZATION	376	0.0394672	0.883597	0.593561	0.798764	1	4091	tags=34%, list=30%, signal=46%
GO_CYTOKINESIS	133	0.0645517	0.882651	0.60198	0.800024	1	7309	tags=59%, list=53%, signal=125%
GO_REGULATION_OF_CYTOKINESIS	72	0.0875762	0.879696	0.599572	0.805103	1	7800	tags=65%, list=57%, signal=149%
GO_CELL_CHEMOTAXIS	184	0.0554478	0.879175	0.598394	0.805576	1	4641	tags=39%, list=34%, signal=58%
GO_CELLULAR_RESPONSE_TO_GLUCOSE_STARVATION	40	0.118371	0.878831	0.605042	0.805693	1	4922	tags=48%, list=36%, signal=74%
GO_NEGATIVE_REGULATION_OF_PROTEASOMAL_UBIQUITIN_DEPENDENT_PROTEIN_CATABOLIC_PROCESS	31	0.132441	0.877622	0.598425	0.807449	1	10633	tags=90%, list=77%, signal=394%
GO_NEUROTRANSMITTER_UPTAKE	31	0.131984	0.877427	0.583658	0.807228	1	1297	tags=23%, list=9%, signal=25%
GO_CEREBRAL_CORTEX_RADIALLY_ORIENTED_CELL_MIGRATION	28	0.140101	0.877395	0.597015	0.806724	1	1026	tags=21%, list=7%, signal=23%
GO_RESPONSE_TO_PROSTAGLANDIN	23	0.151125	0.875941	0.589189	0.80896	1	4514	tags=48%, list=33%, signal=71%
GO_EXOCRINE_SYSTEM_DEVELOPMENT	43	0.111808	0.875532	0.619239	0.809144	1	5197	tags=49%, list=38%, signal=78%
GO_RESPONSE_TO_ANTINEOPLASTIC_AGENT	81	0.0854229	0.874074	0.631791	0.811316	1	10746	tags=86%, list=78%, signal=389%
GO_MEMBRANE_DEPOLARIZATION	79	0.0847728	0.872856	0.593633	0.813054	1	1106	tags=16%, list=8%, signal=18%
GO_REGULATION_OF_EMBRYONIC_DEVELOPMENT	102	0.0746843	0.872839	0.620545	0.812526	1	2492	tags=25%, list=18%, signal=31%
GO_POSITIVE_REGULATION_OF_ERYTHROCYTE_DIFFERENTIATION	25	0.145341	0.872396	0.615542	0.812809	1	2963	tags=36%, list=21%, signal=46%
GO_INTERACTION_WITH_SYMBIONT	52	0.104289	0.871591	0.636364	0.813757	1	8379	tags=71%, list=61%, signal=181%
GO_POSITIVE_REGULATION_OF_INTERLEUKIN_10_PRODUCTION	21	0.161811	0.871241	0.608031	0.813857	1	4338	tags=48%, list=31%, signal=69%
GO_POSITIVE_REGULATION_OF_LIPASE_ACTIVITY	50	0.103099	0.871051	0.623247	0.813666	1	5202	tags=48%, list=38%, signal=77%
GO_NEGATIVE_REGULATION_OF_LYMPHOCYTE_MEDIATED_IMMUNITY	21	0.156085	0.869968	0.638258	0.815081	1	6387	tags=62%, list=46%, signal=115%
GO_REGULATION_OF_PROTEIN_LOCALIZATION_TO_SYNAPSE	24	0.148716	0.869746	0.617464	0.814902	1	6571	tags=63%, list=48%, signal=119%
GO_POSITIVE_REGULATION_OF_RECEPTOR_INTERNALIZATION	21	0.158813	0.869382	0.610887	0.815043	1	9633	tags=86%, list=70%, signal=284%
GO_ALPHA_BETA_T_CELL_DIFFERENTIATION	71	0.0906275	0.869094	0.610548	0.815037	1	9633	tags=79%, list=70%, signal=260%
GO_RESPONSE_TO_AMMONIUM_ION	110	0.0721139	0.86908	0.617409	0.814496	1	893	tags=14%, list=6%, signal=14%
GO_REGULATION_OF_CELL_MIGRATION_INVOLVED_IN_SPROUTING_ANGIOGENESIS	36	0.119944	0.867886	0.62753	0.816228	1	6777	tags=61%, list=49%, signal=120%
GO_REGULATION_OF_ACTOMYOSIN_STRUCTURE_ORGANIZATION	78	0.0837667	0.867737	0.630219	0.815938	1	5569	tags=49%, list=40%, signal=81%
GO_PROTEIN_INSERTION_INTO_MEMBRANE	56	0.101175	0.867535	0.637624	0.815769	1	7475	tags=64%, list=54%, signal=140%
GO_IMMUNE_RESPONSE_REGULATING_CELL_SURFACE_RECEPTOR_SIGNALING_PATHWAY	292	0.044584	0.867506	0.632768	0.815273	1	10685	tags=82%, list=77%, signal=356%
GO_LYMPHOCYTE_ACTIVATION	467	0.0346709	0.86749	0.618026	0.814741	1	6152	tags=48%, list=45%, signal=84%
GO_POSITIVE_REGULATION_OF_B_CELL_MEDIATED_IMMUNITY	23	0.154893	0.867482	0.602881	0.8142	1	9259	tags=83%, list=67%, signal=251%
GO_POSITIVE_REGULATION_OF_CELL_GROWTH	138	0.0631252	0.867019	0.642722	0.814559	1	7032	tags=57%, list=51%, signal=116%
GO_NEGATIVE_REGULATION_OF_INTRACELLULAR_PROTEIN_TRANSPORT	37	0.119216	0.865904	0.596154	0.816097	1	8423	tags=73%, list=61%, signal=187%
GO_BRANCHING_INVOLVED_IN_MAMMARY_GLAND_DUCT_MORPHOGENESIS	19	0.165079	0.865825	0.60241	0.815686	1	9339	tags=84%, list=68%, signal=261%
GO_NEGATIVE_REGULATION_OF_CHROMOSOME_SEGREGATION	40	0.113441	0.865289	0.610136	0.816165	1	7748	tags=68%, list=56%, signal=154%
GO_TRANSCRIPTION_BY_RNA_POLYMERASE_I	55	0.100684	0.864475	0.635478	0.817097	1	12407	tags=100%, list=90%, signal=992%
GO_CYTOSKELETON_DEPENDENT_INTRACELLULAR_TRANSPORT	165	0.05788	0.864319	0.618182	0.816805	1	8070	tags=64%, list=59%, signal=153%
GO_FACE_MORPHOGENESIS	30	0.132796	0.864201	0.619329	0.816479	1	3688	tags=40%, list=27%, signal=54%
GO_POSITIVE_REGULATION_OF_PROTEIN_MODIFICATION_BY_SMALL_PROTEIN_CONJUGATION_OR_REMOVAL	114	0.0681051	0.864098	0.631148	0.816119	1	10681	tags=84%, list=77%, signal=370%
GO_TOLL_LIKE_RECEPTOR_9_SIGNALING_PATHWAY	19	0.166058	0.863981	0.632207	0.815795	1	7148	tags=68%, list=52%, signal=142%
GO_MEMBRANE_REPOLARIZATION_DURING_ACTION_POTENTIAL	22	0.156194	0.863599	0.642412	0.815947	1	4117	tags=45%, list=30%, signal=65%
GO_REGULATION_OF_PHOSPHOLIPASE_ACTIVITY	50	0.103172	0.863219	0.619522	0.816116	1	5201	tags=48%, list=38%, signal=77%
GO_GLAND_DEVELOPMENT	337	0.0405757	0.86296	0.64833	0.816019	1	2686	tags=23%, list=19%, signal=28%
GO_NEURAL_CREST_CELL_MIGRATION	48	0.104558	0.862522	0.61017	0.816282	1	4021	tags=40%, list=29%, signal=56%
GO_NEGATIVE_REGULATION_OF_MYELOID_LEUKOCYTE_DIFFERENTIATION	37	0.12146	0.861816	0.630137	0.817089	1	1683	tags=24%, list=12%, signal=28%
GO_T_CELL_DIFFERENTIATION	170	0.0563088	0.861167	0.654167	0.817793	1	7101	tags=57%, list=51%, signal=116%
GO_NEGATIVE_REGULATION_OF_TRANSMEMBRANE_TRANSPORT	91	0.0779651	0.860906	0.628968	0.817686	1	6963	tags=58%, list=50%, signal=117%
GO_REGULATION_OF_BONE_DEVELOPMENT	17	0.172221	0.860754	0.606996	0.81742	1	1683	tags=29%, list=12%, signal=33%
GO_SPLEEN_DEVELOPMENT	21	0.159342	0.859668	0.626459	0.818944	1	4372	tags=48%, list=32%, signal=70%
GO_GLANDULAR_EPITHELIAL_CELL_DIFFERENTIATION	35	0.121287	0.85935	0.649299	0.819026	1	4241	tags=43%, list=31%, signal=62%
GO_PROTEIN_CONTAINING_COMPLEX_DISASSEMBLY	301	0.0415189	0.858882	0.632735	0.819405	1	8694	tags=67%, list=63%, signal=178%
GO_POSITIVE_REGULATION_OF_LIPID_STORAGE	16	0.179292	0.858554	0.633588	0.819426	1	977	tags=25%, list=7%, signal=27%
GO_EMBRYONIC_DIGIT_MORPHOGENESIS	50	0.10361	0.85809	0.627615	0.819745	1	8229	tags=70%, list=60%, signal=173%
GO_NEGATIVE_REGULATION_OF_SYNAPTIC_TRANSMISSION	61	0.0920576	0.857313	0.622449	0.820646	1	6874	tags=59%, list=50%, signal=117%
GO_REGULATION_OF_PROTEASOMAL_UBIQUITIN_DEPENDENT_PROTEIN_CATABOLIC_PROCESS	114	0.0691191	0.85729	0.628459	0.820125	1	11272	tags=89%, list=82%, signal=481%
GO_NITRIC_OXIDE_BIOSYNTHETIC_PROCESS	54	0.0995082	0.85728	0.62756	0.819593	1	9103	tags=76%, list=66%, signal=222%
GO_POSITIVE_REGULATION_OF_RHO_PROTEIN_SIGNAL_TRANSDUCTION	20	0.160776	0.856681	0.628866	0.820183	1	5370	tags=55%, list=39%, signal=90%
GO_CARDIAC_CELL_DEVELOPMENT	68	0.087304	0.856238	0.613806	0.820466	1	5088	tags=46%, list=37%, signal=72%
GO_RESPONSE_TO_HEPATOCYTE_GROWTH_FACTOR	17	0.17267	0.855997	0.65	0.820391	1	5733	tags=59%, list=42%, signal=101%
GO_ODONTOGENESIS_OF_DENTIN_CONTAINING_TOOTH	67	0.0897001	0.855045	0.627291	0.821513	1	2473	tags=27%, list=18%, signal=33%
GO_NUCLEOTIDE_SUGAR_METABOLIC_PROCESS	16	0.177173	0.85491	0.63035	0.821213	1	3592	tags=44%, list=26%, signal=59%
GO_SEMAPHORIN_PLEXIN_SIGNALING_PATHWAY	38	0.116995	0.854216	0.63	0.821965	1	7463	tags=66%, list=54%, signal=143%
GO_PEROXISOMAL_MEMBRANE_TRANSPORT	18	0.169099	0.854048	0.644351	0.821723	1	11461	tags=100%, list=83%, signal=591%
GO_NEGATIVE_REGULATION_OF_EXTRINSIC_APOPTOTIC_SIGNALING_PATHWAY_VIA_DEATH_DOMAIN_RECEPTORS	29	0.136989	0.85402	0.646694	0.821219	1	9527	tags=83%, list=69%, signal=267%
GO_POSITIVE_REGULATION_OF_DENDRITE_DEVELOPMENT	66	0.0894519	0.853871	0.650672	0.820952	1	9219	tags=76%, list=67%, signal=227%
GO_REGULATION_OF_CELLULAR_PROTEIN_CATABOLIC_PROCESS	225	0.0484496	0.852769	0.655172	0.822389	1	10681	tags=82%, list=77%, signal=359%
GO_REGULATION_OF_RUFFLE_ASSEMBLY	26	0.138587	0.852466	0.645793	0.82242	1	3926	tags=42%, list=28%, signal=59%
GO_RRNA_TRANSCRIPTION	25	0.141836	0.851285	0.644269	0.824059	1	7976	tags=72%, list=58%, signal=170%
GO_RIBOSOMAL_SMALL_SUBUNIT_BIOGENESIS	60	0.0957032	0.851257	0.634343	0.82355	1	4661	tags=43%, list=34%, signal=65%
GO_JNK_CASCADE	176	0.0565148	0.849893	0.634952	0.825427	1	8084	tags=64%, list=59%, signal=153%
GO_PEPTIDYL_TYROSINE_MODIFICATION	287	0.042668	0.848932	0.650888	0.826663	1	2354	tags=21%, list=17%, signal=25%
GO_POSITIVE_REGULATION_OF_ISOTYPE_SWITCHING	18	0.167853	0.847751	0.662768	0.828282	1	10712	tags=94%, list=78%, signal=422%
GO_NEGATIVE_REGULATION_OF_SIGNAL_TRANSDUCTION_IN_ABSENCE_OF_LIGAND	26	0.137813	0.847247	0.64902	0.828683	1	11893	tags=100%, list=86%, signal=725%
GO_POSITIVE_REGULATION_OF_PROTEIN_MATURATION	18	0.171277	0.847116	0.618661	0.828371	1	2237	tags=33%, list=16%, signal=40%
GO_RNA_SPLICING_VIA_ENDONUCLEOLYTIC_CLEAVAGE_AND_LIGATION	15	0.183188	0.847009	0.633333	0.828027	1	10347	tags=93%, list=75%, signal=373%
GO_RESPONSE_TO_GLUCAGON	30	0.131437	0.846431	0.602294	0.828535	1	7844	tags=70%, list=57%, signal=162%
GO_MANNOSYLATION	29	0.132168	0.846407	0.663551	0.828029	1	11020	tags=93%, list=80%, signal=462%
GO_CARTILAGE_DEVELOPMENT	155	0.0587449	0.846122	0.666667	0.828011	1	2490	tags=24%, list=18%, signal=29%
GO_WATER_HOMEOSTASIS	48	0.101997	0.845549	0.633197	0.828491	1	6642	tags=58%, list=48%, signal=112%
GO_REGULATION_OF_HEART_MORPHOGENESIS	30	0.129932	0.844849	0.648485	0.829222	1	7405	tags=67%, list=54%, signal=144%
GO_REGULATION_OF_REPRODUCTIVE_PROCESS	99	0.0723161	0.842716	0.637652	0.832644	1	1377	tags=17%, list=10%, signal=19%
GO_ENDOPLASMIC_RETICULUM_UNFOLDED_PROTEIN_RESPONSE	107	0.069084	0.842596	0.67835	0.832326	1	11298	tags=89%, list=82%, signal=487%
GO_NEGATIVE_REGULATION_OF_PROTEASOMAL_PROTEIN_CATABOLIC_PROCESS	48	0.10428	0.841572	0.663405	0.833661	1	10633	tags=88%, list=77%, signal=381%
GO_NEURON_FATE_SPECIFICATION	15	0.181794	0.841485	0.641584	0.833267	1	3011	tags=40%, list=22%, signal=51%
GO_ESTABLISHMENT_OR_MAINTENANCE_OF_CYTOSKELETON_POLARITY	16	0.177387	0.841461	0.675875	0.832764	1	4451	tags=50%, list=32%, signal=74%
GO_REGULATION_OF_CALCIUM_MEDIATED_SIGNALING	80	0.0817127	0.841251	0.646602	0.832558	1	2154	tags=24%, list=16%, signal=28%
GO_REGULATION_OF_CARDIAC_MUSCLE_CONTRACTION_BY_REGULATION_OF_THE_RELEASE_OF_SEQUESTERED_CALCIUM_ION	19	0.162343	0.84019	0.651639	0.833936	1	7925	tags=74%, list=57%, signal=173%
GO_RIBOSOME_ASSEMBLY	55	0.0943069	0.839712	0.688	0.834259	1	4220	tags=40%, list=31%, signal=57%
GO_CEREBRAL_CORTEX_NEURON_DIFFERENTIATION	21	0.155773	0.83954	0.648594	0.833996	1	2451	tags=33%, list=18%, signal=40%
GO_REGULATION_OF_CELL_KILLING	44	0.105317	0.839509	0.665992	0.833502	1	6387	tags=57%, list=46%, signal=105%
GO_HIPPOCAMPUS_DEVELOPMENT	74	0.0847006	0.839491	0.662136	0.832976	1	1819	tags=22%, list=13%, signal=25%
GO_POSITIVE_REGULATION_OF_OSTEOCLAST_DIFFERENTIATION	15	0.179806	0.838789	0.671845	0.833698	1	6716	tags=67%, list=49%, signal=130%
GO_MYD88_INDEPENDENT_TOLL_LIKE_RECEPTOR_SIGNALING_PATHWAY	30	0.126677	0.837774	0.662813	0.834998	1	10208	tags=87%, list=74%, signal=333%
GO_DORSAL_VENTRAL_NEURAL_TUBE_PATTERNING	20	0.156721	0.837758	0.659574	0.834479	1	599	tags=20%, list=4%, signal=21%
GO_POSITIVE_REGULATION_OF_PHOSPHOLIPASE_ACTIVITY	42	0.105971	0.836834	0.665314	0.835604	1	7736	tags=67%, list=56%, signal=151%
GO_REGULATION_OF_WATER_LOSS_VIA_SKIN	15	0.180444	0.836293	0.67094	0.836039	1	3949	tags=47%, list=29%, signal=65%
GO_PHYSIOLOGICAL_CARDIAC_MUSCLE_HYPERTROPHY	22	0.147552	0.835704	0.667319	0.836544	1	4236	tags=45%, list=31%, signal=66%
GO_COLLAGEN_FIBRIL_ORGANIZATION	46	0.104335	0.835698	0.642045	0.836007	1	4561	tags=43%, list=33%, signal=65%
GO_REGULATION_OF_PROTEIN_TARGETING_TO_MITOCHONDRION	41	0.110074	0.835531	0.65725	0.835755	1	7231	tags=63%, list=52%, signal=133%
GO_POSITIVE_REGULATION_OF_TELOMERASE_ACTIVITY	35	0.116988	0.835174	0.66996	0.835856	1	2330	tags=29%, list=17%, signal=34%
GO_NEUROTRANSMITTER_METABOLIC_PROCESS	103	0.0719169	0.834924	0.649485	0.835746	1	1023	tags=15%, list=7%, signal=16%
GO_REGULATION_OF_MACROPHAGE_CHEMOTAXIS	17	0.167225	0.83313	0.675835	0.838436	1	5808	tags=59%, list=42%, signal=101%
GO_MEMBRANE_BIOGENESIS	31	0.12571	0.832436	0.660156	0.839168	1	9391	tags=81%, list=68%, signal=252%
GO_REGULATION_OF_PROTEIN_DEPHOSPHORYLATION	119	0.0654697	0.832215	0.674556	0.839044	1	5362	tags=45%, list=39%, signal=74%
GO_REGULATION_OF_CYTOSKELETON_ORGANIZATION	463	0.0333365	0.831751	0.671429	0.839382	1	1044	tags=11%, list=8%, signal=11%
GO_STRIATED_MUSCLE_CELL_PROLIFERATION	53	0.0968901	0.831743	0.641905	0.838845	1	1270	tags=19%, list=9%, signal=21%
GO_DEVELOPMENT_OF_PRIMARY_FEMALE_SEXUAL_CHARACTERISTICS	83	0.0777806	0.830821	0.644211	0.83994	1	11893	tags=94%, list=86%, signal=679%
GO_REGULATION_OF_PHAGOCYTOSIS	61	0.0899323	0.82969	0.692946	0.841404	1	9164	tags=75%, list=66%, signal=224%
GO_RESPONSE_TO_UV	122	0.0628363	0.829545	0.692946	0.841117	1	7166	tags=58%, list=52%, signal=120%
GO_REGULATION_OF_CALCINEURIN_MEDIATED_SIGNALING	29	0.13097	0.82925	0.679764	0.841101	1	2001	tags=28%, list=15%, signal=32%
GO_NEUROINFLAMMATORY_RESPONSE	42	0.1086	0.829037	0.693157	0.840923	1	5073	tags=48%, list=37%, signal=75%
GO_DNA_DAMAGE_RESPONSE_DETECTION_OF_DNA_DAMAGE	37	0.113942	0.828643	0.662577	0.841064	1	9241	tags=78%, list=67%, signal=237%
GO_REGULATION_OF_LEUKOCYTE_CHEMOTAXIS	73	0.0834949	0.828356	0.669847	0.841027	1	7166	tags=60%, list=52%, signal=125%
GO_TRNA_WOBBLE_BASE_MODIFICATION	20	0.152531	0.828333	0.679359	0.840524	1	4794	tags=50%, list=35%, signal=77%
GO_SMOOTH_MUSCLE_CELL_APOPTOTIC_PROCESS	19	0.159725	0.828008	0.667961	0.840582	1	3606	tags=42%, list=26%, signal=57%
GO_DETERMINATION_OF_HEART_LEFT_RIGHT_ASYMMETRY	45	0.102992	0.827283	0.665339	0.841263	1	5632	tags=51%, list=41%, signal=86%
GO_POSTREPLICATION_REPAIR	50	0.0963656	0.826952	0.653923	0.841314	1	9156	tags=76%, list=66%, signal=225%
GO_PLACENTA_DEVELOPMENT	116	0.0649076	0.825951	0.659664	0.842569	1	5888	tags=49%, list=43%, signal=85%
GO_POSITIVE_REGULATION_OF_DENDRITE_MORPHOGENESIS	35	0.119935	0.825591	0.663327	0.842665	1	9776	tags=83%, list=71%, signal=284%
GO_MACROMOLECULE_DEACYLATION	90	0.0737878	0.825487	0.696607	0.842309	1	10787	tags=86%, list=78%, signal=390%
GO_CELLULAR_RESPONSE_TO_NUTRIENT	53	0.0973199	0.824799	0.665298	0.843002	1	4907	tags=45%, list=36%, signal=70%
GO_NEGATIVE_REGULATION_OF_RECEPTOR_MEDIATED_ENDOCYTOSIS	19	0.15645	0.824571	0.682975	0.842872	1	8732	tags=79%, list=63%, signal=215%
GO_MALE_GENITALIA_DEVELOPMENT	16	0.171624	0.824328	0.672	0.842765	1	9702	tags=88%, list=70%, signal=295%
GO_CELLULAR_RESPONSE_TO_REACTIVE_NITROGEN_SPECIES	16	0.16858	0.824152	0.692308	0.842544	1	8882	tags=81%, list=64%, signal=228%
GO_NEURON_RECOGNITION	46	0.104599	0.823579	0.67118	0.842984	1	6656	tags=59%, list=48%, signal=113%
GO_REGULATION_OF_MICROGLIAL_CELL_ACTIVATION	15	0.172764	0.823319	0.668016	0.842896	1	6813	tags=67%, list=49%, signal=132%
GO_REGULATION_OF_ESTABLISHMENT_OR_MAINTENANCE_OF_CELL_POLARITY	22	0.143101	0.82324	0.699399	0.842495	1	5551	tags=55%, list=40%, signal=91%
GO_NEGATIVE_REGULATION_OF_ADAPTIVE_IMMUNE_RESPONSE	30	0.128087	0.823144	0.662289	0.842118	1	11108	tags=93%, list=81%, signal=479%
GO_WOUND_HEALING	407	0.0360669	0.823043	0.673428	0.841752	1	3413	tags=28%, list=25%, signal=36%
GO_NEGATIVE_REGULATION_OF_RESPONSE_TO_ENDOPLASMIC_RETICULUM_STRESS	41	0.109643	0.822795	0.677358	0.841662	1	4546	tags=44%, list=33%, signal=65%
GO_PHOTORECEPTOR_CELL_DEVELOPMENT	34	0.118889	0.822595	0.675351	0.841475	1	2014	tags=26%, list=15%, signal=31%
GO_MODIFICATION_OF_MORPHOLOGY_OR_PHYSIOLOGY_OF_OTHER_ORGANISM	88	0.0747904	0.821861	0.679592	0.842269	1	12295	tags=97%, list=89%, signal=885%
GO_REGULATION_OF_STEROID_METABOLIC_PROCESS	88	0.0756893	0.821718	0.667946	0.841968	1	1626	tags=19%, list=12%, signal=22%
GO_NEURON_DEATH_IN_RESPONSE_TO_OXIDATIVE_STRESS	23	0.145255	0.821687	0.667992	0.841473	1	2796	tags=35%, list=20%, signal=44%
GO_REGULATION_OF_ACTIN_FILAMENT_ORGANIZATION	222	0.0477081	0.82151	0.709939	0.841244	1	6682	tags=53%, list=48%, signal=101%
GO_PULMONARY_VALVE_DEVELOPMENT	18	0.158402	0.821365	0.692898	0.840981	1	5479	tags=56%, list=40%, signal=92%
GO_REGULATION_OF_FIBROBLAST_GROWTH_FACTOR_RECEPTOR_SIGNALING_PATHWAY	25	0.134348	0.820972	0.674847	0.841097	1	9734	tags=84%, list=71%, signal=285%
GO_POSITIVE_REGULATION_OF_LYMPHOCYTE_MIGRATION	22	0.145551	0.820778	0.690802	0.840919	1	6771	tags=64%, list=49%, signal=125%
GO_ACTIVATION_OF_PROTEIN_KINASE_ACTIVITY	282	0.0430847	0.820378	0.683495	0.841066	1	10127	tags=78%, list=73%, signal=286%
GO_ENDODERM_FORMATION	37	0.114738	0.820141	0.7	0.840947	1	1030	tags=19%, list=7%, signal=20%
GO_ERROR_FREE_TRANSLESION_SYNTHESIS	18	0.159297	0.819371	0.683908	0.841751	1	11596	tags=100%, list=84%, signal=627%
GO_NEGATIVE_REGULATION_OF_ORGAN_GROWTH	26	0.135444	0.818987	0.665272	0.841845	1	2378	tags=31%, list=17%, signal=37%
GO_RESPONSE_TO_CORTICOSTERONE	18	0.164222	0.818825	0.675269	0.841598	1	1568	tags=28%, list=11%, signal=31%
GO_NUCLEAR_TRANSCRIBED_MRNA_CATABOLIC_PROCESS_NONSENSE_MEDIATED_DECAY	117	0.063735	0.8187	0.684989	0.841283	1	12447	tags=97%, list=90%, signal=983%
GO_REGULATION_OF_CALCIUM_ION_DEPENDENT_EXOCYTOSIS	106	0.0679176	0.818533	0.706693	0.841045	1	891	tags=13%, list=6%, signal=14%
GO_NEURON_PROJECTION_EXTENSION	153	0.0568495	0.818356	0.6893	0.840823	1	7967	tags=63%, list=58%, signal=148%
GO_PROTEIN_EXIT_FROM_ENDOPLASMIC_RETICULUM	40	0.108328	0.818106	0.686117	0.840717	1	3681	tags=38%, list=27%, signal=51%
GO_PYRIMIDINE_NUCLEOTIDE_BIOSYNTHETIC_PROCESS	42	0.106112	0.817058	0.644898	0.841997	1	6749	tags=60%, list=49%, signal=116%
GO_NEUROTROPHIN_SIGNALING_PATHWAY	38	0.110724	0.816595	0.69901	0.842286	1	8638	tags=74%, list=63%, signal=197%
GO_CD4_POSITIVE_ALPHA_BETA_T_CELL_ACTIVATION	61	0.0892159	0.816444	0.675676	0.841988	1	9626	tags=79%, list=70%, signal=259%
GO_REGULATION_OF_CARTILAGE_DEVELOPMENT	53	0.0962061	0.815876	0.708494	0.842443	1	8305	tags=70%, list=60%, signal=175%
GO_ENDOSOME_ORGANIZATION	70	0.0846742	0.815867	0.673347	0.841927	1	10067	tags=81%, list=73%, signal=300%
GO_POSITIVE_REGULATION_OF_G1_S_TRANSITION_OF_MITOTIC_CELL_CYCLE	35	0.117437	0.815395	0.684318	0.842244	1	4688	tags=46%, list=34%, signal=69%
GO_RESPONSE_TO_GROWTH_HORMONE	28	0.128224	0.814669	0.706478	0.843007	1	1682	tags=25%, list=12%, signal=28%
GO_AMYLOID_PRECURSOR_PROTEIN_METABOLIC_PROCESS	53	0.0931709	0.814067	0.679487	0.84349	1	4964	tags=45%, list=36%, signal=70%
GO_REGULATION_OF_CELL_GROWTH_INVOLVED_IN_CARDIAC_MUSCLE_CELL_DEVELOPMENT	15	0.172735	0.813955	0.701375	0.843147	1	1297	tags=27%, list=9%, signal=29%
GO_POSITIVE_REGULATION_OF_GLYCOPROTEIN_BIOSYNTHETIC_PROCESS	18	0.159321	0.812385	0.712215	0.845326	1	3934	tags=44%, list=29%, signal=62%
GO_RESPONSE_TO_PROGESTERONE	36	0.114625	0.811698	0.67126	0.846004	1	6084	tags=56%, list=44%, signal=99%
GO_PROTEIN_LOCALIZATION_TO_CELL_SURFACE	52	0.0960853	0.810577	0.655936	0.847402	1	1331	tags=19%, list=10%, signal=21%
GO_NEGATIVE_REGULATION_OF_INTRACELLULAR_SIGNAL_TRANSDUCTION	426	0.0342291	0.810394	0.704403	0.847186	1	6955	tags=54%, list=50%, signal=105%
GO_REGULATION_OF_ARP2_3_COMPLEX_MEDIATED_ACTIN_NUCLEATION	16	0.166334	0.809854	0.697581	0.847567	1	8051	tags=75%, list=58%, signal=180%
GO_DNA_SYNTHESIS_INVOLVED_IN_DNA_REPAIR	48	0.0998327	0.809574	0.674651	0.847497	1	3224	tags=33%, list=23%, signal=43%
GO_REGULATION_OF_CENTROSOME_CYCLE	54	0.0942952	0.809429	0.700205	0.847197	1	9430	tags=78%, list=68%, signal=245%
GO_RELEASE_OF_SEQUESTERED_CALCIUM_ION_INTO_CYTOSOL_BY_ENDOPLASMIC_RETICULUM	26	0.132979	0.807219	0.703863	0.850484	1	8777	tags=77%, list=64%, signal=211%
GO_COLUMNAR_CUBOIDAL_EPITHELIAL_CELL_DIFFERENTIATION	78	0.0764098	0.806874	0.69962	0.850582	1	8322	tags=68%, list=60%, signal=170%
GO_NEGATIVE_REGULATION_OF_METAPHASE_ANAPHASE_TRANSITION_OF_CELL_CYCLE	34	0.114866	0.806638	0.686316	0.850456	1	7748	tags=68%, list=56%, signal=154%
GO_CELLULAR_COMPONENT_DISASSEMBLY	472	0.0327839	0.806607	0.710843	0.849981	1	8620	tags=66%, list=63%, signal=169%
GO_LEUKOCYTE_MIGRATION	277	0.0406975	0.805698	0.72093	0.851008	1	7166	tags=56%, list=52%, signal=114%
GO_ALCOHOL_BIOSYNTHETIC_PROCESS	141	0.0579128	0.804683	0.680808	0.852183	1	5077	tags=43%, list=37%, signal=67%
GO_REGULATION_OF_CELL_MATURATION	17	0.162651	0.804221	0.72233	0.852414	1	5871	tags=59%, list=43%, signal=102%
GO_CELLULAR_PIGMENTATION	44	0.100425	0.804132	0.706478	0.852033	1	9902	tags=82%, list=72%, signal=289%
GO_NEGATIVE_REGULATION_OF_ION_TRANSMEMBRANE_TRANSPORT	75	0.0790405	0.802764	0.690141	0.853857	1	7925	tags=65%, list=57%, signal=153%
GO_CYTOPLASMIC_PATTERN_RECOGNITION_RECEPTOR_SIGNALING_PATHWAY	56	0.0916091	0.802534	0.681188	0.853721	1	9084	tags=75%, list=66%, signal=219%
GO_T_CELL_CYTOKINE_PRODUCTION	22	0.145551	0.80186	0.69703	0.854324	1	6771	tags=64%, list=49%, signal=125%
GO_SYNAPSE_MATURATION	25	0.133323	0.801742	0.700971	0.854008	1	5335	tags=52%, list=39%, signal=85%
GO_GRANULOCYTE_DIFFERENTIATION	26	0.129599	0.801062	0.735849	0.85457	1	5641	tags=54%, list=41%, signal=91%
GO_REGULATION_OF_FIBROBLAST_MIGRATION	30	0.125056	0.800826	0.714286	0.854441	1	6093	tags=57%, list=44%, signal=101%
GO_POSITIVE_REGULATION_OF_RNA_SPLICING	30	0.124373	0.800606	0.722222	0.85427	1	586	tags=17%, list=4%, signal=17%
GO_MICROTUBULE_BUNDLE_FORMATION	76	0.0787632	0.800354	0.715953	0.854171	1	11621	tags=92%, list=84%, signal=582%
GO_REGULATION_OF_PROTEIN_LOCALIZATION_TO_CELL_SURFACE	34	0.112212	0.799778	0.746589	0.854583	1	889	tags=18%, list=6%, signal=19%
GO_NUCLEOTIDE_PHOSPHORYLATION	18	0.156345	0.799334	0.726	0.854783	1	3975	tags=44%, list=29%, signal=62%
GO_HEAD_MORPHOGENESIS	34	0.115144	0.798994	0.69863	0.854797	1	3688	tags=38%, list=27%, signal=52%
GO_POSITIVE_REGULATION_OF_ENDOTHELIAL_CELL_MIGRATION	91	0.071188	0.7987	0.723658	0.854742	1	5995	tags=51%, list=43%, signal=89%
GO_LEARNING	129	0.0609805	0.798616	0.7182	0.854347	1	2480	tags=24%, list=18%, signal=29%
GO_INACTIVATION_OF_MAPK_ACTIVITY	25	0.13547	0.796532	0.700197	0.857379	1	7512	tags=68%, list=54%, signal=149%
GO_CELL_SUBSTRATE_JUNCTION_ASSEMBLY	92	0.0694473	0.796325	0.712245	0.857199	1	3095	tags=29%, list=22%, signal=38%
GO_PORE_COMPLEX_ASSEMBLY	15	0.174753	0.796225	0.66474	0.856834	1	3108	tags=40%, list=23%, signal=52%
GO_POSITIVE_REGULATION_OF_COAGULATION	18	0.155449	0.794708	0.730159	0.858835	1	7052	tags=67%, list=51%, signal=136%
GO_GLOMERULAR_EPITHELIUM_DEVELOPMENT	17	0.163287	0.79369	0.709419	0.859959	1	5051	tags=53%, list=37%, signal=83%
GO_MESODERMAL_CELL_DIFFERENTIATION	21	0.140035	0.790346	0.746507	0.865018	1	11205	tags=95%, list=81%, signal=507%
GO_DETECTION_OF_LIGHT_STIMULUS	45	0.0985644	0.789919	0.728	0.865216	1	4467	tags=42%, list=32%, signal=62%
GO_RESPONSE_TO_DEXAMETHASONE	35	0.11387	0.789211	0.731898	0.86589	1	3949	tags=40%, list=29%, signal=56%
GO_REGULATION_OF_ADAPTIVE_IMMUNE_RESPONSE	110	0.0629021	0.788725	0.73913	0.86622	1	9419	tags=75%, list=68%, signal=233%
GO_PROTEOGLYCAN_BIOSYNTHETIC_PROCESS	62	0.0862807	0.787835	0.759082	0.867162	1	7267	tags=61%, list=53%, signal=129%
GO_POSITIVE_REGULATION_OF_TRANSLATIONAL_INITIATION	23	0.137313	0.787801	0.700624	0.866691	1	6503	tags=61%, list=47%, signal=115%
GO_REGULATION_OF_LYMPHOCYTE_MEDIATED_IMMUNITY	84	0.072958	0.786995	0.699793	0.867458	1	6387	tags=54%, list=46%, signal=99%
GO_AMEBOIDAL_TYPE_CELL_MIGRATION	333	0.0379921	0.786607	0.748936	0.86758	1	3215	tags=27%, list=23%, signal=34%
GO_POSITIVE_REGULATION_OF_MRNA_SPLICING_VIA_SPLICEOSOME	16	0.162995	0.78633	0.727273	0.867487	1	8097	tags=75%, list=59%, signal=181%
GO_SNRNA_TRANSCRIPTION	68	0.0813212	0.785882	0.731518	0.86768	1	7401	tags=62%, list=54%, signal=133%
GO_REGULATION_OF_CYSTEINE_TYPE_ENDOPEPTIDASE_ACTIVITY_INVOLVED_IN_APOPTOTIC_SIGNALING_PATHWAY	16	0.164873	0.785542	0.7393	0.86773	1	9795	tags=88%, list=71%, signal=302%
GO_REGULATION_OF_HEART_GROWTH	54	0.0914238	0.783215	0.715152	0.870917	1	1297	tags=19%, list=9%, signal=20%
GO_NEGATIVE_REGULATION_OF_G_PROTEIN_COUPLED_RECEPTOR_SIGNALING_PATHWAY	40	0.104932	0.782782	0.725275	0.871098	1	7865	tags=68%, list=57%, signal=157%
GO_ENTRAINMENT_OF_CIRCADIAN_CLOCK	24	0.134625	0.782345	0.760563	0.871286	1	6765	tags=63%, list=49%, signal=122%
GO_I_KAPPAB_KINASE_NF_KAPPAB_SIGNALING	213	0.0472471	0.782084	0.730994	0.871188	1	12760	tags=97%, list=93%, signal=1280%
GO_CHROMOSOME_LOCALIZATION	69	0.0799732	0.781627	0.736626	0.871431	1	7496	tags=62%, list=54%, signal=136%
GO_CENTRAL_NERVOUS_SYSTEM_NEURON_DEVELOPMENT	75	0.0761476	0.780828	0.762279	0.872223	1	1345	tags=17%, list=10%, signal=19%
GO_POSITIVE_REGULATION_OF_EPITHELIAL_CELL_MIGRATION	128	0.057949	0.780096	0.754527	0.872903	1	5995	tags=49%, list=43%, signal=86%
GO_REGULATION_OF_LEUKOCYTE_PROLIFERATION	150	0.0542248	0.778367	0.749511	0.875057	1	1282	tags=15%, list=9%, signal=16%
GO_POSITIVE_REGULATION_OF_ACTIN_FILAMENT_POLYMERIZATION	87	0.0717661	0.777348	0.769857	0.876132	1	8051	tags=66%, list=58%, signal=156%
GO_POSITIVE_REGULATION_OF_DEVELOPMENTAL_GROWTH	143	0.0552646	0.777315	0.738095	0.875661	1	1270	tags=15%, list=9%, signal=16%
GO_POSITIVE_REGULATION_OF_PROTEIN_LOCALIZATION_TO_MEMBRANE	109	0.063797	0.777074	0.744376	0.875532	1	3934	tags=35%, list=29%, signal=48%
GO_INTERLEUKIN_1_MEDIATED_SIGNALING_PATHWAY	92	0.0676533	0.77662	0.770492	0.875752	1	11664	tags=91%, list=85%, signal=588%
GO_POSITIVE_REGULATION_OF_MUSCLE_CONTRACTION	34	0.115881	0.776164	0.721311	0.875941	1	2461	tags=29%, list=18%, signal=36%
GO_PROTEIN_LOCALIZATION_TO_MITOCHONDRION	132	0.0589904	0.776083	0.756335	0.875537	1	7238	tags=58%, list=52%, signal=122%
GO_PROTEIN_TARGETING_TO_MITOCHONDRION	94	0.0692883	0.776008	0.758836	0.875131	1	8733	tags=70%, list=63%, signal=190%
GO_NEGATIVE_REGULATION_OF_EPITHELIAL_CELL_PROLIFERATION	99	0.066772	0.775648	0.747082	0.875169	1	5632	tags=47%, list=41%, signal=80%
GO_REGULATION_OF_PROTEIN_CATABOLIC_PROCESS	341	0.0359134	0.775234	0.759259	0.875305	1	6917	tags=54%, list=50%, signal=105%
GO_VASCULOGENESIS	68	0.0810136	0.774554	0.761224	0.875912	1	2335	tags=25%, list=17%, signal=30%
GO_POSITIVE_REGULATION_OF_CHONDROCYTE_DIFFERENTIATION	17	0.154289	0.774158	0.728778	0.875993	1	1930	tags=29%, list=14%, signal=34%
GO_INFLAMMATORY_RESPONSE_TO_ANTIGENIC_STIMULUS	31	0.115693	0.774138	0.75	0.875495	1	5525	tags=52%, list=40%, signal=86%
GO_CARBOHYDRATE_PHOSPHORYLATION	24	0.132464	0.773486	0.732	0.875963	1	7944	tags=71%, list=58%, signal=167%
GO_GRANULOCYTE_MIGRATION	69	0.0791177	0.773284	0.760246	0.875765	1	7108	tags=59%, list=52%, signal=122%
GO_MICROTUBULE_CYTOSKELETON_ORGANIZATION	481	0.0310702	0.772737	0.753564	0.876077	1	4775	tags=38%, list=35%, signal=56%
GO_PROTEIN_TRANSPORT_ALONG_MICROTUBULE	65	0.0835875	0.772229	0.751528	0.876335	1	11794	tags=94%, list=86%, signal=645%
GO_POSITIVE_REGULATION_OF_RECEPTOR_MEDIATED_ENDOCYTOSIS	43	0.0976886	0.77188	0.746507	0.87637	1	6674	tags=58%, list=48%, signal=112%
GO_MYELOID_LEUKOCYTE_CYTOKINE_PRODUCTION	28	0.121397	0.771527	0.784158	0.876396	1	9164	tags=79%, list=66%, signal=234%
GO_ANIMAL_ORGAN_REGENERATION	64	0.0820532	0.771336	0.760618	0.876162	1	7923	tags=66%, list=57%, signal=154%
GO_MONOCYTE_CHEMOTAXIS	29	0.121434	0.771115	0.744511	0.875976	1	4510	tags=45%, list=33%, signal=66%
GO_DOPAMINERGIC_NEURON_DIFFERENTIATION	24	0.131147	0.771066	0.745968	0.875529	1	9686	tags=83%, list=70%, signal=279%
GO_RESPONSE_TO_INTERLEUKIN_4	27	0.122066	0.770743	0.756048	0.87551	1	9556	tags=81%, list=69%, signal=265%
GO_REGULATION_OF_ANOIKIS	19	0.145123	0.770391	0.751381	0.87556	1	8888	tags=79%, list=64%, signal=222%
GO_REGULATION_OF_CYTOKINE_PRODUCTION_INVOLVED_IN_IMMUNE_RESPONSE	56	0.0862071	0.769293	0.769857	0.876783	1	9897	tags=80%, list=72%, signal=283%
GO_POSITIVE_REGULATION_OF_REPRODUCTIVE_PROCESS	49	0.0901719	0.768092	0.722334	0.878134	1	730	tags=14%, list=5%, signal=15%
GO_REGULATION_OF_ENDOTHELIAL_CELL_DIFFERENTIATION	26	0.127511	0.768057	0.742268	0.877667	1	7261	tags=65%, list=53%, signal=138%
GO_REGULATION_OF_RESPONSE_TO_CYTOKINE_STIMULUS	133	0.0565132	0.767638	0.777336	0.877802	1	11048	tags=86%, list=80%, signal=427%
GO_T_CELL_DIFFERENTIATION_INVOLVED_IN_IMMUNE_RESPONSE	44	0.0977023	0.766298	0.761905	0.879384	1	9626	tags=80%, list=70%, signal=263%
GO_REGULATION_OF_NEUROTRANSMITTER_UPTAKE	16	0.157663	0.766266	0.741935	0.878897	1	413	tags=19%, list=3%, signal=19%
GO_T_CELL_ACTIVATION_INVOLVED_IN_IMMUNE_RESPONSE	56	0.0880078	0.766226	0.73501	0.878424	1	9626	tags=79%, list=70%, signal=259%
GO_MIRNA_METABOLIC_PROCESS	19	0.149361	0.766118	0.753036	0.87807	1	11733	tags=100%, list=85%, signal=669%
GO_NEGATIVE_REGULATION_OF_SYSTEMIC_ARTERIAL_BLOOD_PRESSURE	16	0.157024	0.765291	0.764706	0.878876	1	11627	tags=100%, list=84%, signal=637%
GO_NEGATIVE_REGULATION_OF_ALPHA_BETA_T_CELL_DIFFERENTIATION	18	0.150476	0.765224	0.777778	0.878455	1	9419	tags=83%, list=68%, signal=263%
GO_REGULATION_OF_MONOOXYGENASE_ACTIVITY	41	0.103294	0.764973	0.759336	0.878307	1	1606	tags=22%, list=12%, signal=25%
GO_REGULATION_OF_CARDIAC_MUSCLE_CONTRACTION	64	0.0804334	0.763567	0.760163	0.880006	1	4282	tags=39%, list=31%, signal=56%
GO_POSITIVE_REGULATION_OF_TRANSCRIPTION_FROM_RNA_POLYMERASE_II_PROMOTER_INVOLVED_IN_CELLULAR_RESPONSE_TO_CHEMICAL_STIMULUS	21	0.140015	0.761631	0.760649	0.882472	1	2668	tags=33%, list=19%, signal=41%
GO_DIGESTIVE_SYSTEM_DEVELOPMENT	108	0.0612967	0.761426	0.784114	0.882272	1	948	tags=13%, list=7%, signal=14%
GO_AMINE_BIOSYNTHETIC_PROCESS	19	0.143957	0.761095	0.767857	0.882261	1	4549	tags=47%, list=33%, signal=71%
GO_COLLATERAL_SPROUTING	26	0.124091	0.759679	0.742	0.884006	1	943	tags=19%, list=7%, signal=21%
GO_POSITIVE_REGULATION_OF_MULTI_ORGANISM_PROCESS	149	0.0531978	0.758883	0.763052	0.884693	1	2883	tags=26%, list=21%, signal=33%
GO_REGULATION_OF_NIK_NF_KAPPAB_SIGNALING	83	0.0704785	0.758368	0.770021	0.884939	1	10830	tags=86%, list=79%, signal=396%
GO_POSTSYNAPTIC_NEUROTRANSMITTER_RECEPTOR_INTERNALIZATION	16	0.156107	0.75796	0.775432	0.885008	1	6468	tags=63%, list=47%, signal=118%
GO_NEGATIVE_REGULATION_OF_ERBB_SIGNALING_PATHWAY	43	0.0964081	0.757046	0.767396	0.885877	1	5088	tags=47%, list=37%, signal=73%
GO_EPITHELIAL_CELL_FATE_COMMITMENT	15	0.159756	0.756287	0.767068	0.886532	1	8831	tags=80%, list=64%, signal=222%
GO_NEURAL_RETINA_DEVELOPMENT	49	0.0928496	0.75605	0.778234	0.886379	1	1819	tags=22%, list=13%, signal=26%
GO_NEGATIVE_REGULATION_OF_GENE_SILENCING	22	0.13644	0.756043	0.772926	0.885865	1	4389	tags=45%, list=32%, signal=67%
GO_CHAPERONE_MEDIATED_AUTOPHAGY	16	0.154365	0.756036	0.78373	0.885352	1	6492	tags=63%, list=47%, signal=118%
GO_EPITHELIAL_CELL_APOPTOTIC_PROCESS	80	0.071522	0.755802	0.75	0.885208	1	9534	tags=76%, list=69%, signal=246%
GO_POSITIVE_REGULATION_OF_AXON_EXTENSION	39	0.104041	0.755744	0.785867	0.884768	1	2458	tags=28%, list=18%, signal=34%
GO_REGULATION_OF_CLATHRIN_DEPENDENT_ENDOCYTOSIS	16	0.156107	0.755303	0.787575	0.884923	1	6468	tags=63%, list=47%, signal=118%
GO_POSITIVE_REGULATION_OF_DENDRITIC_SPINE_MORPHOGENESIS	18	0.145429	0.755112	0.774127	0.884693	1	2593	tags=33%, list=19%, signal=41%
GO_REGULATION_OF_MONOCYTE_CHEMOTAXIS	16	0.156112	0.754484	0.773063	0.885154	1	5606	tags=56%, list=41%, signal=95%
GO_REGULATION_OF_NITRIC_OXIDE_SYNTHASE_ACTIVITY	36	0.105974	0.753353	0.759615	0.886345	1	1606	tags=22%, list=12%, signal=25%
GO_POSITIVE_REGULATION_OF_RESPONSE_TO_EXTERNAL_STIMULUS	213	0.0446362	0.752298	0.793456	0.887501	1	7292	tags=57%, list=53%, signal=120%
GO_NEGATIVE_REGULATION_OF_VASCULATURE_DEVELOPMENT	100	0.0652925	0.751934	0.786749	0.887539	1	760	tags=12%, list=6%, signal=13%
GO_CILIUM_MOVEMENT_INVOLVED_IN_CELL_MOTILITY	18	0.148818	0.751592	0.742394	0.887505	1	5611	tags=56%, list=41%, signal=94%
GO_T_CELL_DIFFERENTIATION_IN_THYMUS	53	0.0879753	0.751179	0.789683	0.88762	1	5816	tags=51%, list=42%, signal=88%
GO_REGULATION_OF_NEUROTRANSMITTER_RECEPTOR_ACTIVITY	66	0.0778738	0.751137	0.805556	0.887162	1	4363	tags=39%, list=32%, signal=57%
GO_REGULATION_OF_SKELETAL_MUSCLE_CELL_DIFFERENTIATION	17	0.149339	0.746692	0.765957	0.893441	1	11733	tags=100%, list=85%, signal=669%
GO_VASCULAR_SMOOTH_MUSCLE_CELL_DIFFERENTIATION	23	0.13028	0.746111	0.784708	0.893763	1	4801	tags=48%, list=35%, signal=73%
GO_B_CELL_RECEPTOR_SIGNALING_PATHWAY	43	0.0973385	0.7461	0.785156	0.893256	1	1868	tags=23%, list=14%, signal=27%
GO_INTRACILIARY_TRANSPORT	50	0.0891027	0.744559	0.778865	0.895058	1	12014	tags=96%, list=87%, signal=742%
GO_FEMALE_SEX_DIFFERENTIATION	95	0.0643124	0.744282	0.786667	0.89497	1	11893	tags=93%, list=86%, signal=668%
GO_REGULATION_OF_CHOLESTEROL_EFFLUX	17	0.152325	0.744068	0.796748	0.89477	1	5202	tags=53%, list=38%, signal=85%
GO_REGULATION_OF_CELL_CYCLE_G1_S_PHASE_TRANSITION	150	0.0519962	0.742491	0.782868	0.896616	1	4990	tags=41%, list=36%, signal=64%
GO_REGULATION_OF_ISOTYPE_SWITCHING	24	0.124128	0.741993	0.807281	0.896849	1	4611	tags=46%, list=33%, signal=69%
GO_REGULATION_OF_NOTCH_SIGNALING_PATHWAY	88	0.0675085	0.741738	0.8	0.896679	1	5656	tags=48%, list=41%, signal=80%
GO_NEGATIVE_REGULATION_OF_ALPHA_BETA_T_CELL_ACTIVATION	27	0.120637	0.741431	0.782961	0.896588	1	11108	tags=93%, list=81%, signal=475%
GO_AXO_DENDRITIC_TRANSPORT	64	0.0778609	0.740975	0.79	0.89674	1	8627	tags=70%, list=63%, signal=187%
GO_REGULATION_OF_VIRAL_LIFE_CYCLE	99	0.0640431	0.740804	0.814371	0.896486	1	7341	tags=60%, list=53%, signal=127%
GO_REGULATION_OF_POSTSYNAPTIC_MEMBRANE_POTENTIAL	122	0.058791	0.740401	0.813253	0.896566	1	891	tags=12%, list=6%, signal=13%
GO_REGULATION_OF_CELL_CYCLE_PHASE_TRANSITION	400	0.0326122	0.739976	0.81854	0.896657	1	10733	tags=81%, list=78%, signal=355%
GO_CELL_CELL_RECOGNITION	40	0.100749	0.739575	0.776699	0.896729	1	4130	tags=40%, list=30%, signal=57%
GO_PIGMENTATION	82	0.0703535	0.739352	0.787149	0.896538	1	2230	tags=23%, list=16%, signal=27%
GO_PLATELET_ACTIVATION	133	0.0551083	0.73928	0.805068	0.896138	1	3394	tags=30%, list=25%, signal=40%
GO_ESTABLISHMENT_OF_MITOCHONDRION_LOCALIZATION	22	0.134254	0.738756	0.80202	0.896383	1	9434	tags=82%, list=68%, signal=259%
GO_RESPONSE_TO_ETHANOL	102	0.0626716	0.738573	0.794872	0.896137	1	1710	tags=19%, list=12%, signal=21%
GO_REGULATION_OF_INFLAMMATORY_RESPONSE_TO_ANTIGENIC_STIMULUS	16	0.152532	0.737928	0.815476	0.896562	1	9965	tags=88%, list=72%, signal=315%
GO_NUCLEAR_ENVELOPE_REASSEMBLY	18	0.143469	0.737557	0.797917	0.89656	1	11814	tags=100%, list=86%, signal=697%
GO_NEGATIVE_REGULATION_OF_SMALL_GTPASE_MEDIATED_SIGNAL_TRANSDUCTION	51	0.0873577	0.73667	0.816568	0.897286	1	10156	tags=82%, list=74%, signal=311%
GO_RELAXATION_OF_CARDIAC_MUSCLE	16	0.156062	0.736401	0.806262	0.897141	1	1297	tags=25%, list=9%, signal=28%
GO_RIBOSOMAL_LARGE_SUBUNIT_ASSEMBLY	26	0.118495	0.734925	0.808247	0.898755	1	4733	tags=46%, list=34%, signal=70%
GO_REGULATION_OF_PROTEASOMAL_PROTEIN_CATABOLIC_PROCESS	169	0.0485167	0.733796	0.826087	0.899878	1	10681	tags=82%, list=77%, signal=360%
GO_NEGATIVE_REGULATION_OF_VIRAL_GENOME_REPLICATION	31	0.114202	0.73337	0.788934	0.899984	1	7325	tags=65%, list=53%, signal=137%
GO_MITOCHONDRIAL_CALCIUM_ION_TRANSMEMBRANE_TRANSPORT	23	0.129721	0.733368	0.802817	0.899462	1	12004	tags=100%, list=87%, signal=770%
GO_PHOTOTRANSDUCTION	35	0.104858	0.732881	0.8	0.899648	1	4467	tags=43%, list=32%, signal=63%
GO_REGULATION_OF_CELL_PROJECTION_ASSEMBLY	154	0.051181	0.731389	0.815195	0.901301	1	8704	tags=68%, list=63%, signal=183%
GO_POSITIVE_REGULATION_OF_LEUKOCYTE_MEDIATED_IMMUNITY	77	0.0706596	0.731257	0.806061	0.900959	1	9418	tags=75%, list=68%, signal=236%
GO_CELLULAR_RESPONSE_TO_OXYGEN_LEVELS	202	0.0441956	0.730371	0.808795	0.901626	1	8820	tags=68%, list=64%, signal=187%
GO_POSITIVE_REGULATION_OF_CELL_ADHESION_MEDIATED_BY_INTEGRIN	16	0.152305	0.730096	0.818713	0.901509	1	11692	tags=100%, list=85%, signal=656%
GO_REGULATION_OF_PROTEIN_TARGETING	74	0.0724156	0.728395	0.82846	0.903423	1	6833	tags=57%, list=50%, signal=112%
GO_TUMOR_NECROSIS_FACTOR_BIOSYNTHETIC_PROCESS	17	0.147358	0.7279	0.788168	0.903593	1	403	tags=18%, list=3%, signal=18%
GO_FC_RECEPTOR_MEDIATED_STIMULATORY_SIGNALING_PATHWAY	78	0.0698299	0.727096	0.818898	0.904204	1	12302	tags=96%, list=89%, signal=886%
GO_RUFFLE_ORGANIZATION	48	0.0888862	0.725914	0.827519	0.905277	1	4811	tags=44%, list=35%, signal=67%
GO_REGULATION_OF_PHOSPHOPROTEIN_PHOSPHATASE_ACTIVITY	99	0.0619805	0.725116	0.797872	0.905876	1	822	tags=12%, list=6%, signal=13%
GO_DETECTION_OF_VISIBLE_LIGHT	35	0.104858	0.725071	0.822368	0.905412	1	4467	tags=43%, list=32%, signal=63%
GO_COLLAGEN_BIOSYNTHETIC_PROCESS	34	0.106068	0.724722	0.823077	0.905377	1	2596	tags=29%, list=19%, signal=36%
GO_SECRETORY_GRANULE_ORGANIZATION	27	0.117287	0.723696	0.831643	0.906266	1	9111	tags=78%, list=66%, signal=229%
GO_POSITIVE_REGULATION_OF_EXTRACELLULAR_MATRIX_ORGANIZATION	18	0.142816	0.722932	0.793684	0.906837	1	2629	tags=33%, list=19%, signal=41%
GO_MODIFICATION_BY_SYMBIONT_OF_HOST_MORPHOLOGY_OR_PHYSIOLOGY	35	0.101751	0.722363	0.816327	0.90713	1	8056	tags=69%, list=58%, signal=164%
GO_CELLULAR_RESPONSE_TO_LEPTIN_STIMULUS	15	0.150377	0.722084	0.820158	0.90701	1	1605	tags=27%, list=12%, signal=30%
GO_VIRAL_LIFE_CYCLE	254	0.0395527	0.721199	0.80123	0.90771	1	8368	tags=65%, list=61%, signal=161%
GO_POSITIVE_REGULATION_OF_GLUCOSE_TRANSMEMBRANE_TRANSPORT	31	0.108615	0.720184	0.816956	0.908597	1	6957	tags=61%, list=50%, signal=123%
GO_PHOSPHATIDYLINOSITOL_PHOSPHORYLATION	46	0.0873361	0.720153	0.797468	0.908106	1	1197	tags=17%, list=9%, signal=19%
GO_RESPONSE_TO_ATP	23	0.124264	0.719286	0.820926	0.908829	1	3085	tags=35%, list=22%, signal=45%
GO_POSITIVE_REGULATION_OF_GROWTH	211	0.0422921	0.718752	0.843874	0.909049	1	1843	tags=18%, list=13%, signal=20%
GO_REGULATION_OF_MULTI_ORGANISM_PROCESS	280	0.0369675	0.717854	0.832994	0.90974	1	2504	tags=22%, list=18%, signal=26%
GO_POSITIVE_REGULATION_OF_CELL_CYCLE	330	0.033881	0.717332	0.821577	0.909938	1	4725	tags=38%, list=34%, signal=56%
GO_POST_TRANSLATIONAL_PROTEIN_MODIFICATION	307	0.0354641	0.716806	0.835878	0.910155	1	3429	tags=28%, list=25%, signal=37%
GO_PROTEIN_DEPHOSPHORYLATION	282	0.0377959	0.715815	0.827789	0.910955	1	11959	tags=90%, list=87%, signal=667%
GO_CELLULAR_RESPONSE_TO_INTERFERON_BETA	15	0.153267	0.715045	0.816456	0.911548	1	3404	tags=40%, list=25%, signal=53%
GO_DEFENSE_RESPONSE_TO_GRAM_POSITIVE_BACTERIUM	32	0.105867	0.713938	0.83619	0.91255	1	3714	tags=38%, list=27%, signal=51%
GO_NEGATIVE_REGULATION_OF_KINASE_ACTIVITY	208	0.0433843	0.71124	0.821429	0.915678	1	6040	tags=48%, list=44%, signal=84%
GO_PROTEIN_LOCALIZATION_TO_MICROTUBULE_ORGANIZING_CENTER	31	0.106777	0.710025	0.823417	0.916774	1	11431	tags=94%, list=83%, signal=545%
GO_DOPAMINE_RECEPTOR_SIGNALING_PATHWAY	35	0.101217	0.709178	0.847737	0.917344	1	3335	tags=34%, list=24%, signal=45%
GO_TRANSLESION_SYNTHESIS	40	0.0954113	0.708979	0.872093	0.917084	1	12478	tags=100%, list=90%, signal=1047%
GO_CELL_CELL_ADHESION_VIA_PLASMA_MEMBRANE_ADHESION_MOLECULES	221	0.0409121	0.708067	0.87605	0.917789	1	3500	tags=29%, list=25%, signal=39%
GO_SENSORY_PERCEPTION_OF_TEMPERATURE_STIMULUS	17	0.145966	0.707141	0.82268	0.918507	1	10157	tags=88%, list=74%, signal=334%
GO_MITOTIC_G2_M_TRANSITION_CHECKPOINT	26	0.114359	0.70527	0.819383	0.920508	1	11155	tags=92%, list=81%, signal=482%
GO_GLIAL_CELL_ACTIVATION	34	0.102921	0.704432	0.858546	0.921087	1	5073	tags=47%, list=37%, signal=74%
GO_CELLULAR_RESPONSE_TO_ARSENIC_CONTAINING_SUBSTANCE	18	0.139101	0.703709	0.836032	0.921497	1	11108	tags=94%, list=81%, signal=485%
GO_NEGATIVE_REGULATION_OF_BIOMINERAL_TISSUE_DEVELOPMENT	19	0.136077	0.703417	0.858252	0.921349	1	2480	tags=32%, list=18%, signal=38%
GO_REGULATION_OF_MICROTUBULE_BASED_PROCESS	195	0.0446953	0.702794	0.834343	0.921649	1	9434	tags=73%, list=68%, signal=227%
GO_SEROTONIN_RECEPTOR_SIGNALING_PATHWAY	18	0.141811	0.702512	0.857685	0.921463	1	3409	tags=39%, list=25%, signal=52%
GO_WNT_SIGNALING_PATHWAY_CALCIUM_MODULATING_PATHWAY	32	0.105031	0.701796	0.842742	0.921896	1	10621	tags=88%, list=77%, signal=380%
GO_CHAPERONE_MEDIATED_PROTEIN_COMPLEX_ASSEMBLY	17	0.139841	0.701014	0.844622	0.922419	1	2129	tags=29%, list=15%, signal=35%
GO_POSITIVE_REGULATION_OF_PROTEIN_TARGETING_TO_MITOCHONDRION	30	0.109171	0.700982	0.828629	0.921935	1	7231	tags=63%, list=52%, signal=133%
GO_REGULATION_OF_ACUTE_INFLAMMATORY_RESPONSE	28	0.109333	0.700946	0.840385	0.92146	1	1942	tags=25%, list=14%, signal=29%
GO_NEGATIVE_REGULATION_OF_LYASE_ACTIVITY	18	0.137286	0.699989	0.850775	0.922146	1	1939	tags=28%, list=14%, signal=32%
GO_STEM_CELL_DIVISION	37	0.0971315	0.699663	0.838835	0.922066	1	4254	tags=41%, list=31%, signal=58%
GO_RIBONUCLEOPROTEIN_COMPLEX_DISASSEMBLY	15	0.15257	0.699065	0.846473	0.922344	1	8930	tags=80%, list=65%, signal=227%
GO_NEGATIVE_REGULATION_OF_TISSUE_REMODELING	16	0.144446	0.699057	0.850716	0.921829	1	1457	tags=25%, list=11%, signal=28%
GO_NEGATIVE_REGULATION_OF_UBIQUITIN_PROTEIN_TRANSFERASE_ACTIVITY	15	0.146312	0.698419	0.84728	0.922173	1	10855	tags=93%, list=79%, signal=438%
GO_CHROMOSOME_SEPARATION	78	0.0670223	0.697659	0.859471	0.922627	1	10042	tags=79%, list=73%, signal=291%
GO_MAGNESIUM_ION_TRANSPORT	15	0.151176	0.697625	0.838323	0.922139	1	1594	tags=27%, list=12%, signal=30%
GO_NEURON_PROJECTION_ORGANIZATION	82	0.0650543	0.697339	0.868217	0.921985	1	789	tags=12%, list=6%, signal=13%
GO_EMBRYO_IMPLANTATION	37	0.0957225	0.696454	0.862213	0.922554	1	2037	tags=24%, list=15%, signal=28%
GO_SKELETAL_MUSCLE_ORGAN_DEVELOPMENT	131	0.052864	0.69543	0.847251	0.923304	1	856	tags=11%, list=6%, signal=12%
GO_PROTEIN_TARGETING_TO_LYSOSOME	20	0.130517	0.694901	0.852207	0.923473	1	9924	tags=85%, list=72%, signal=303%
GO_POSITIVE_REGULATION_OF_ACTIN_FILAMENT_BUNDLE_ASSEMBLY	54	0.0803345	0.694613	0.875764	0.923309	1	4514	tags=41%, list=33%, signal=60%
GO_POST_EMBRYONIC_ANIMAL_ORGAN_DEVELOPMENT	15	0.144541	0.694192	0.85443	0.923325	1	9960	tags=87%, list=72%, signal=312%
GO_MACROPHAGE_ACTIVATION	65	0.0720721	0.692415	0.863445	0.925076	1	6860	tags=57%, list=50%, signal=113%
GO_EPIBOLY	27	0.111813	0.691952	0.852652	0.925161	1	3057	tags=33%, list=22%, signal=43%
GO_TETRAPYRROLE_METABOLIC_PROCESS	20	0.12689	0.691383	0.835729	0.925325	1	3768	tags=40%, list=27%, signal=55%
GO_POSITIVE_REGULATION_OF_CARDIAC_MUSCLE_CELL_PROLIFERATION	21	0.123104	0.691316	0.855397	0.92489	1	9468	tags=81%, list=69%, signal=258%
GO_SOMATIC_STEM_CELL_DIVISION	21	0.128582	0.690114	0.856589	0.925916	1	1512	tags=24%, list=11%, signal=27%
GO_LYMPH_VESSEL_MORPHOGENESIS	19	0.128667	0.688064	0.840909	0.927939	1	12018	tags=100%, list=87%, signal=777%
GO_REGULATION_OF_T_CELL_MEDIATED_CYTOTOXICITY	19	0.133624	0.687921	0.848425	0.927602	1	6143	tags=58%, list=45%, signal=104%
GO_RESPONSE_TO_FUNGUS	18	0.134938	0.687484	0.862745	0.927608	1	9633	tags=83%, list=70%, signal=276%
GO_POSITIVE_REGULATION_OF_NITRIC_OXIDE_BIOSYNTHETIC_PROCESS	30	0.106279	0.68729	0.860279	0.927313	1	5432	tags=50%, list=39%, signal=82%
GO_MEMBRANE_PROTEIN_ECTODOMAIN_PROTEOLYSIS	37	0.0941643	0.686422	0.843621	0.927856	1	5413	tags=49%, list=39%, signal=80%
GO_POSITIVE_REGULATION_OF_CELL_MIGRATION_INVOLVED_IN_SPROUTING_ANGIOGENESIS	20	0.126283	0.68615	0.861053	0.927682	1	5845	tags=55%, list=42%, signal=95%
GO_POSITIVE_REGULATION_OF_ORGAN_GROWTH	39	0.0911923	0.684383	0.868668	0.929345	1	9707	tags=79%, list=70%, signal=268%
GO_NEGATIVE_REGULATION_OF_CATABOLIC_PROCESS	252	0.0374913	0.68306	0.871636	0.93045	1	1571	tags=15%, list=11%, signal=17%
GO_IRON_ION_TRANSMEMBRANE_TRANSPORT	16	0.141466	0.680583	0.861868	0.932876	1	2360	tags=31%, list=17%, signal=38%
GO_LEUKOCYTE_DIFFERENTIATION	365	0.0312573	0.680208	0.849505	0.932782	1	6796	tags=52%, list=49%, signal=100%
GO_NEGATIVE_REGULATION_OF_OSTEOBLAST_DIFFERENTIATION	36	0.0965285	0.678685	0.886179	0.934066	1	6716	tags=58%, list=49%, signal=113%
GO_PROTEASOMAL_UBIQUITIN_INDEPENDENT_PROTEIN_CATABOLIC_PROCESS	21	0.123415	0.678315	0.885375	0.933954	1	8807	tags=76%, list=64%, signal=211%
GO_REGULATION_OF_SMOOTH_MUSCLE_CONTRACTION	48	0.0818417	0.677699	0.859184	0.934158	1	6919	tags=58%, list=50%, signal=117%
GO_RETINAL_GANGLION_CELL_AXON_GUIDANCE	18	0.133353	0.676658	0.898406	0.934889	1	5824	tags=56%, list=42%, signal=96%
GO_B_CELL_ACTIVATION_INVOLVED_IN_IMMUNE_RESPONSE	51	0.0776308	0.675582	0.86722	0.935586	1	4611	tags=41%, list=33%, signal=62%
GO_FEEDING_BEHAVIOR	66	0.0711641	0.673545	0.857741	0.937437	1	276	tags=9%, list=2%, signal=9%
GO_NEGATIVE_REGULATION_OF_PROTEIN_BINDING	84	0.0623978	0.672648	0.870259	0.937954	1	12278	tags=95%, list=89%, signal=863%
GO_NEGATIVE_REGULATION_OF_DENDRITE_DEVELOPMENT	24	0.114377	0.670696	0.858672	0.939708	1	8193	tags=71%, list=59%, signal=174%
GO_T_CELL_MEDIATED_CYTOTOXICITY	27	0.110264	0.668913	0.882122	0.941188	1	6143	tags=56%, list=45%, signal=100%
GO_ENDOPLASMIC_RETICULUM_TO_CYTOSOL_TRANSPORT	27	0.108722	0.667527	0.865385	0.942202	1	11272	tags=93%, list=82%, signal=506%
GO_PIGMENT_GRANULE_LOCALIZATION	22	0.118474	0.666726	0.89901	0.942582	1	10905	tags=91%, list=79%, signal=434%
GO_RESPONSE_TO_LIGHT_STIMULUS	254	0.0359281	0.666231	0.893788	0.942635	1	8037	tags=62%, list=58%, signal=145%
GO_REGULATION_OF_CELL_ADHESION_MEDIATED_BY_INTEGRIN	40	0.0915279	0.665952	0.883576	0.942413	1	7015	tags=60%, list=51%, signal=122%
GO_NERVE_DEVELOPMENT	59	0.0728658	0.661758	0.899065	0.946554	1	7647	tags=63%, list=55%, signal=140%
GO_GLYCOPROTEIN_BIOSYNTHETIC_PROCESS	290	0.0330548	0.661217	0.869099	0.946587	1	7114	tags=55%, list=52%, signal=111%
GO_POSITIVE_REGULATION_OF_RECEPTOR_SIGNALING_PATHWAY_VIA_STAT	54	0.0758212	0.660647	0.906504	0.946657	1	4576	tags=41%, list=33%, signal=61%
GO_POSITIVE_REGULATION_OF_DENDRITIC_SPINE_DEVELOPMENT	39	0.0888766	0.660505	0.891393	0.946278	1	4081	tags=38%, list=30%, signal=54%
GO_REGULATION_OF_ALPHA_BETA_T_CELL_ACTIVATION	74	0.0652259	0.660493	0.863821	0.945771	1	9168	tags=73%, list=66%, signal=217%
GO_PERICARDIUM_DEVELOPMENT	15	0.144977	0.658337	0.880859	0.947589	1	760	tags=20%, list=6%, signal=21%
GO_ESTABLISHMENT_OF_PROTEIN_LOCALIZATION_TO_POSTSYNAPTIC_MEMBRANE	18	0.128875	0.658292	0.888889	0.947108	1	2821	tags=33%, list=20%, signal=42%
GO_NEGATIVE_REGULATION_OF_CALCIUM_ION_TRANSPORT	45	0.0828265	0.656827	0.883333	0.948189	1	3151	tags=31%, list=23%, signal=40%
GO_POSITIVE_REGULATION_OF_CYCLIN_DEPENDENT_PROTEIN_KINASE_ACTIVITY	33	0.0960962	0.656457	0.901031	0.948066	1	12050	tags=97%, list=87%, signal=766%
GO_PANCREAS_DEVELOPMENT	59	0.0739519	0.654321	0.885655	0.949825	1	12307	tags=97%, list=89%, signal=894%
GO_NEGATIVE_REGULATION_OF_PHOSPHORUS_METABOLIC_PROCESS	458	0.0259688	0.653239	0.90099	0.950416	1	2152	tags=18%, list=16%, signal=21%
GO_REGULATION_OF_CENTRIOLE_REPLICATION	21	0.120811	0.653015	0.874263	0.950119	1	6216	tags=57%, list=45%, signal=104%
GO_POSITIVE_REGULATION_OF_VIRAL_LIFE_CYCLE	51	0.0769972	0.651478	0.896686	0.951175	1	2186	tags=24%, list=16%, signal=28%
GO_SYNAPSE_ASSEMBLY	159	0.0443158	0.651076	0.88664	0.951061	1	3298	tags=28%, list=24%, signal=37%
GO_FIBROBLAST_MIGRATION	38	0.0846667	0.647322	0.925466	0.954411	1	6093	tags=53%, list=44%, signal=94%
GO_GLUTATHIONE_DERIVATIVE_BIOSYNTHETIC_PROCESS	18	0.12654	0.647169	0.914938	0.954043	1	11281	tags=94%, list=82%, signal=518%
GO_COPPER_ION_TRANSPORT	17	0.127999	0.647131	0.904	0.953556	1	8782	tags=76%, list=64%, signal=210%
GO_LABYRINTHINE_LAYER_BLOOD_VESSEL_DEVELOPMENT	19	0.121509	0.646347	0.907787	0.953874	1	5584	tags=53%, list=40%, signal=88%
GO_CELL_KILLING	68	0.0665392	0.646243	0.918164	0.953471	1	6387	tags=53%, list=46%, signal=98%
GO_NEGATIVE_REGULATION_OF_TRANSFERASE_ACTIVITY	235	0.0358575	0.645526	0.912955	0.953657	1	5088	tags=40%, list=37%, signal=63%
GO_NEGATIVE_REGULATION_OF_HEMOPOIESIS	103	0.0535414	0.645318	0.915187	0.953367	1	5693	tags=47%, list=41%, signal=79%
GO_REGULATION_OF_FEEDING_BEHAVIOR	18	0.127702	0.64506	0.90927	0.953092	1	2071	tags=28%, list=15%, signal=33%
GO_NEGATIVE_REGULATION_OF_PROTEIN_LOCALIZATION_TO_MEMBRANE	25	0.109165	0.644005	0.906639	0.953615	1	3461	tags=36%, list=25%, signal=48%
GO_NEGATIVE_REGULATION_OF_DEFENSE_RESPONSE_TO_VIRUS	19	0.122954	0.640988	0.88641	0.956044	1	10645	tags=89%, list=77%, signal=392%
GO_CORPUS_CALLOSUM_DEVELOPMENT	16	0.129147	0.639602	0.925926	0.956843	1	12011	tags=100%, list=87%, signal=774%
GO_REGULATION_OF_MITOCHONDRIAL_MEMBRANE_PERMEABILITY_INVOLVED_IN_APOPTOTIC_PROCESS	56	0.073319	0.639019	0.913628	0.956901	1	6380	tags=54%, list=46%, signal=99%
GO_CELL_MATRIX_ADHESION	185	0.0394691	0.638752	0.906694	0.956634	1	1922	tags=18%, list=14%, signal=20%
GO_UBIQUITIN_DEPENDENT_ERAD_PATHWAY	69	0.0666813	0.63714	0.904031	0.957622	1	3681	tags=33%, list=27%, signal=45%
GO_CELLULAR_RESPONSE_TO_ACID_CHEMICAL	167	0.0416885	0.633753	0.901053	0.960334	1	11653	tags=89%, list=84%, signal=565%
GO_POSITIVE_REGULATION_OF_MYOBLAST_DIFFERENTIATION	15	0.135903	0.633381	0.939516	0.960138	1	5482	tags=53%, list=40%, signal=88%
GO_GLYCOSPHINGOLIPID_BIOSYNTHETIC_PROCESS	25	0.10598	0.632769	0.900862	0.960198	1	195	tags=12%, list=1%, signal=12%
GO_NEGATIVE_REGULATION_OF_CHEMOTAXIS	46	0.0784665	0.631491	0.932939	0.960839	1	7315	tags=61%, list=53%, signal=129%
GO_REGULATION_OF_RECEPTOR_BINDING	19	0.119831	0.630476	0.917004	0.96124	1	10688	tags=89%, list=77%, signal=397%
GO_EPIDERMIS_DEVELOPMENT	211	0.0364709	0.629658	0.925636	0.961492	1	11530	tags=87%, list=84%, signal=524%
GO_ACTIN_FILAMENT_POLYMERIZATION	155	0.0435347	0.628415	0.929638	0.962086	1	651	tags=9%, list=5%, signal=9%
GO_ADHERENS_JUNCTION_ASSEMBLY	87	0.0592427	0.628342	0.90835	0.961638	1	2516	tags=24%, list=18%, signal=29%
GO_POSITIVE_REGULATION_OF_MULTICELLULAR_ORGANISM_GROWTH	27	0.0997449	0.62792	0.918919	0.961511	1	5777	tags=52%, list=42%, signal=89%
GO_NEGATIVE_REGULATION_OF_CALCIUM_ION_TRANSMEMBRANE_TRANSPORT	33	0.0921646	0.627809	0.927022	0.961097	1	7925	tags=67%, list=57%, signal=156%
GO_CELLULAR_RESPONSE_TO_ALCOHOL	74	0.0613069	0.627581	0.923529	0.960777	1	4749	tags=41%, list=34%, signal=62%
GO_REGULATION_OF_CARDIAC_MUSCLE_CONTRACTION_BY_CALCIUM_ION_SIGNALING	23	0.109593	0.625046	0.938931	0.962494	1	3287	tags=35%, list=24%, signal=46%
GO_FOREBRAIN_REGIONALIZATION	18	0.122256	0.624359	0.909664	0.962573	1	2146	tags=28%, list=16%, signal=33%
GO_CELLULAR_RESPONSE_TO_GLUCAGON_STIMULUS	20	0.117697	0.624062	0.9182	0.962299	1	9411	tags=80%, list=68%, signal=252%
GO_CELLULAR_RESPONSE_TO_GAMMA_RADIATION	27	0.100972	0.623175	0.92	0.962517	1	8314	tags=70%, list=60%, signal=177%
GO_POSITIVE_REGULATION_OF_AUTOPHAGY	103	0.0516164	0.618839	0.935818	0.965761	1	8665	tags=68%, list=63%, signal=181%
GO_MATURATION_OF_SSU_RRNA	42	0.0811436	0.616145	0.935484	0.967471	1	12346	tags=98%, list=90%, signal=929%
GO_LEUKOCYTE_PROLIFERATION	195	0.0385996	0.616135	0.93	0.966957	1	1313	tags=13%, list=10%, signal=15%
GO_HINDBRAIN_DEVELOPMENT	130	0.0466336	0.61603	0.929435	0.966523	1	4454	tags=37%, list=32%, signal=54%
GO_LYMPHANGIOGENESIS	16	0.128639	0.614956	0.91716	0.966921	1	12018	tags=100%, list=87%, signal=777%
GO_REGULATION_OF_G_PROTEIN_COUPLED_RECEPTOR_SIGNALING_PATHWAY	116	0.049594	0.614515	0.926531	0.966766	1	2293	tags=22%, list=17%, signal=26%
GO_SPINDLE_LOCALIZATION	40	0.0812759	0.613408	0.912317	0.967161	1	4053	tags=38%, list=29%, signal=53%
GO_REGULATION_OF_NEURON_PROJECTION_REGENERATION	29	0.0942826	0.612347	0.928016	0.967494	1	3457	tags=34%, list=25%, signal=46%
GO_UBIQUITIN_DEPENDENT_PROTEIN_CATABOLIC_PROCESS_VIA_THE_MULTIVESICULAR_BODY_SORTING_PATHWAY	21	0.11025	0.611902	0.954	0.967319	1	5048	tags=48%, list=37%, signal=75%
GO_MITOTIC_G2_DNA_DAMAGE_CHECKPOINT	18	0.119037	0.611896	0.921687	0.966804	1	658	tags=17%, list=5%, signal=17%
GO_CELLULAR_AMINO_ACID_METABOLIC_PROCESS	248	0.0334865	0.611209	0.93	0.966819	1	8999	tags=69%, list=65%, signal=194%
GO_REGULATION_OF_PROTEIN_DEACETYLATION	35	0.0875089	0.611019	0.933202	0.966455	1	9434	tags=77%, list=68%, signal=244%
GO_DNA_REPLICATION_INDEPENDENT_NUCLEOSOME_ORGANIZATION	40	0.0797942	0.604528	0.956067	0.971062	1	9245	tags=75%, list=67%, signal=227%
GO_CELLULAR_RESPONSE_TO_LOW_DENSITY_LIPOPROTEIN_PARTICLE_STIMULUS	17	0.122217	0.604233	0.944334	0.970778	1	3183	tags=35%, list=23%, signal=46%
GO_G_PROTEIN_COUPLED_PURINERGIC_RECEPTOR_SIGNALING_PATHWAY	16	0.121747	0.602261	0.923518	0.971801	1	11251	tags=94%, list=82%, signal=508%
GO_MORPHOGENESIS_OF_AN_EPITHELIAL_FOLD	22	0.107154	0.60197	0.930693	0.971518	1	10434	tags=86%, list=76%, signal=354%
GO_POSITIVE_REGULATION_OF_ATPASE_ACTIVITY	50	0.0709599	0.59839	0.950287	0.973612	1	8126	tags=66%, list=59%, signal=160%
GO_ENDOMEMBRANE_SYSTEM_ORGANIZATION	366	0.0267033	0.597947	0.944972	0.973422	1	10191	tags=77%, list=74%, signal=285%
GO_REGULATION_OF_GLUTAMATE_RECEPTOR_SIGNALING_PATHWAY	61	0.0645577	0.597759	0.958333	0.973032	1	5669	tags=48%, list=41%, signal=80%
GO_RUFFLE_ASSEMBLY	38	0.0839013	0.596965	0.963783	0.97309	1	3926	tags=37%, list=28%, signal=51%
GO_DEFENSE_RESPONSE_TO_OTHER_ORGANISM	253	0.032827	0.596416	0.958	0.972959	1	12855	tags=96%, list=93%, signal=1395%
GO_MICROTUBULE_ORGANIZING_CENTER_ORGANIZATION	122	0.0460639	0.596223	0.945205	0.97259	1	9430	tags=73%, list=68%, signal=229%
GO_COPPER_ION_HOMEOSTASIS	17	0.119543	0.595489	0.927273	0.972596	1	7276	tags=65%, list=53%, signal=137%
GO_MATERNAL_PROCESS_INVOLVED_IN_FEMALE_PREGNANCY	51	0.0714188	0.595123	0.936128	0.97234	1	5778	tags=49%, list=42%, signal=84%
GO_POSITIVE_REGULATION_OF_IMMUNOGLOBULIN_PRODUCTION	29	0.0926064	0.594832	0.947471	0.972035	1	12040	tags=97%, list=87%, signal=759%
GO_PROTEIN_AUTOPHOSPHORYLATION	214	0.0351718	0.593005	0.961014	0.972812	1	2937	tags=25%, list=21%, signal=31%
GO_NON_MOTILE_CILIUM_ASSEMBLY	50	0.0717226	0.592824	0.947368	0.97242	1	11977	tags=94%, list=87%, signal=712%
GO_POSITIVE_REGULATION_OF_MACROPHAGE_ACTIVATION	22	0.105335	0.590279	0.958175	0.973666	1	6071	tags=55%, list=44%, signal=97%
GO_ACTIN_POLYMERIZATION_OR_DEPOLYMERIZATION	180	0.036533	0.585128	0.95858	0.976577	1	651	tags=8%, list=5%, signal=9%
GO_NEGATIVE_REGULATION_OF_MAPK_CASCADE	140	0.041864	0.582839	0.952663	0.977572	1	6126	tags=49%, list=44%, signal=87%
GO_POSITIVE_REGULATION_OF_APOPTOTIC_SIGNALING_PATHWAY	156	0.0406505	0.581428	0.940329	0.97794	1	1036	tags=12%, list=8%, signal=12%
GO_NEGATIVE_REGULATION_OF_CELLULAR_PROTEIN_LOCALIZATION	96	0.0510086	0.579213	0.959064	0.978827	1	737	tags=10%, list=5%, signal=11%
GO_CALCIUM_MEDIATED_SIGNALING_USING_INTRACELLULAR_CALCIUM_SOURCE	16	0.119283	0.577101	0.959144	0.97959	1	10423	tags=88%, list=76%, signal=358%
GO_MEMBRANE_DISASSEMBLY	16	0.11554	0.576597	0.951904	0.979382	1	4441	tags=44%, list=32%, signal=64%
GO_CGMP_MEDIATED_SIGNALING	26	0.0970997	0.575522	0.956175	0.979517	1	11923	tags=96%, list=86%, signal=709%
GO_REGULATION_OF_IMMUNOGLOBULIN_PRODUCTION	42	0.0754964	0.575468	0.971264	0.979028	1	12752	tags=100%, list=92%, signal=1323%
GO_POSITIVE_REGULATION_OF_EPITHELIAL_CELL_DIFFERENTIATION	39	0.07859	0.574837	0.958801	0.978884	1	7405	tags=62%, list=54%, signal=133%
GO_APOPTOTIC_PROCESS_INVOLVED_IN_MORPHOGENESIS	16	0.118716	0.573527	0.977486	0.979184	1	7845	tags=69%, list=57%, signal=159%
GO_CARDIAC_MUSCLE_FIBER_DEVELOPMENT	15	0.124187	0.57286	0.965385	0.979073	1	4724	tags=47%, list=34%, signal=71%
GO_RECEPTOR_CATABOLIC_PROCESS	32	0.0851465	0.572791	0.944444	0.978594	1	5292	tags=47%, list=38%, signal=76%
GO_PROTEIN_TRANSMEMBRANE_IMPORT_INTO_INTRACELLULAR_ORGANELLE	32	0.084765	0.572268	0.967118	0.978365	1	8745	tags=72%, list=63%, signal=196%
GO_MORPHOGENESIS_OF_AN_EPITHELIAL_BUD	16	0.118485	0.569775	0.95102	0.979282	1	10434	tags=88%, list=76%, signal=359%
GO_EPIDERMAL_GROWTH_FACTOR_RECEPTOR_SIGNALING_PATHWAY	101	0.0488005	0.56964	0.957529	0.97885	1	1106	tags=13%, list=8%, signal=14%
GO_POSITIVE_REGULATION_OF_ALPHA_BETA_T_CELL_ACTIVATION	51	0.0663799	0.564403	0.987903	0.981244	1	9633	tags=76%, list=70%, signal=253%
GO_CELL_CYCLE_ARREST	220	0.0327727	0.562142	0.971193	0.981892	1	9396	tags=71%, list=68%, signal=220%
GO_REGULATION_OF_EXTRACELLULAR_MATRIX_ORGANIZATION	32	0.0830525	0.56214	0.970276	0.981375	1	2735	tags=28%, list=20%, signal=35%
GO_POSITIVE_REGULATION_OF_CYTOKINE_PRODUCTION	305	0.0278229	0.562061	0.972112	0.980893	1	7401	tags=56%, list=54%, signal=119%
GO_CD8_POSITIVE_ALPHA_BETA_T_CELL_ACTIVATION	15	0.117073	0.561584	0.963563	0.98063	1	9419	tags=80%, list=68%, signal=252%
GO_POSITIVE_REGULATION_OF_PROTEOLYSIS_INVOLVED_IN_CELLULAR_PROTEIN_CATABOLIC_PROCESS	110	0.0468068	0.560355	0.960861	0.980763	1	6881	tags=55%, list=50%, signal=108%
GO_ERAD_PATHWAY	89	0.0509776	0.560017	0.957916	0.980435	1	11387	tags=88%, list=83%, signal=500%
GO_RESPONSE_TO_TEMPERATURE_STIMULUS	209	0.0330958	0.555961	0.974104	0.981986	1	6412	tags=50%, list=46%, signal=92%
GO_REGULATION_OF_UBIQUITIN_PROTEIN_LIGASE_ACTIVITY	19	0.105867	0.552299	0.971209	0.983273	1	12332	tags=100%, list=89%, signal=944%
GO_NEUROTROPHIN_TRK_RECEPTOR_SIGNALING_PATHWAY	32	0.0809425	0.548445	0.969199	0.984536	1	3195	tags=31%, list=23%, signal=41%
GO_SPROUTING_ANGIOGENESIS	102	0.0468582	0.546098	0.97451	0.985083	1	304	tags=7%, list=2%, signal=7%
GO_HORMONE_BIOSYNTHETIC_PROCESS	54	0.062451	0.542533	0.99053	0.986147	1	1695	tags=19%, list=12%, signal=21%
GO_GERM_CELL_DEVELOPMENT	168	0.0355098	0.542407	0.981781	0.985687	1	2963	tags=25%, list=21%, signal=31%
GO_INTRINSIC_APOPTOTIC_SIGNALING_PATHWAY	250	0.0299532	0.542115	0.98249	0.985287	1	4503	tags=36%, list=33%, signal=52%
GO_NEGATIVE_REGULATION_OF_OSTEOCLAST_DIFFERENTIATION	20	0.0997204	0.541862	0.973129	0.984889	1	8969	tags=75%, list=65%, signal=214%
GO_TRNA_5_END_PROCESSING	15	0.117668	0.541579	0.977413	0.984496	1	7572	tags=67%, list=55%, signal=148%
GO_POSITIVE_REGULATION_OF_ORGANELLE_ASSEMBLY	61	0.0573424	0.53062	0.983193	0.988332	1	2829	tags=26%, list=21%, signal=33%
GO_NEGATIVE_REGULATION_OF_SMOOTH_MUSCLE_CELL_DIFFERENTIATION	15	0.112805	0.529183	0.987854	0.988332	1	3042	tags=33%, list=22%, signal=43%
GO_SPERMATID_DIFFERENTIATION	96	0.0458128	0.52862	0.971831	0.988017	1	2963	tags=26%, list=21%, signal=33%
GO_POSITIVE_REGULATION_OF_CATABOLIC_PROCESS	373	0.023237	0.525964	0.983158	0.988409	1	1351	tags=12%, list=10%, signal=13%
GO_REGULATION_OF_CHROMATIN_BINDING	20	0.100283	0.525447	0.972868	0.988061	1	12409	tags=100%, list=90%, signal=996%
GO_POSITIVE_REGULATION_OF_RESPONSE_TO_CYTOKINE_STIMULUS	45	0.0657209	0.522443	0.983871	0.988584	1	9209	tags=73%, list=67%, signal=220%
GO_ALPHA_BETA_T_CELL_PROLIFERATION	27	0.0850609	0.521433	0.990079	0.988399	1	8533	tags=70%, list=62%, signal=184%
GO_INTEGRIN_ACTIVATION	18	0.0997483	0.518178	0.980469	0.988913	1	11650	tags=94%, list=84%, signal=608%
GO_UNSATURATED_FATTY_ACID_BIOSYNTHETIC_PROCESS	33	0.0758039	0.517316	0.982072	0.988659	1	8568	tags=70%, list=62%, signal=184%
GO_CONTRACTILE_ACTIN_FILAMENT_BUNDLE_ASSEMBLY	84	0.0487916	0.514717	0.991649	0.988924	1	5569	tags=45%, list=40%, signal=75%
GO_POSITIVE_REGULATION_OF_CREB_TRANSCRIPTION_FACTOR_ACTIVITY	16	0.101348	0.489806	0.994083	0.994592	1	11532	tags=94%, list=84%, signal=572%
GO_LONG_TERM_SYNAPTIC_DEPRESSION	28	0.0798492	0.488022	0.985386	0.994425	1	5303	tags=46%, list=38%, signal=75%
GO_POSITIVE_REGULATION_OF_MICROTUBULE_POLYMERIZATION_OR_DEPOLYMERIZATION	29	0.0746358	0.48043	0.994209	0.995285	1	9434	tags=76%, list=68%, signal=240%
GO_REGULATION_OF_CELL_CYCLE_CHECKPOINT	30	0.0718843	0.464588	0.996086	0.997105	1	6365	tags=53%, list=46%, signal=99%
GO_NEGATIVE_REGULATION_OF_CATION_CHANNEL_ACTIVITY	33	0.0667711	0.446872	0.993878	0.99838	1	9946	tags=79%, list=72%, signal=282%
GO_PYRIMIDINE_CONTAINING_COMPOUND_CATABOLIC_PROCESS	28	0.0684029	0.426037	0.99591	0.999206	1	4968	tags=43%, list=36%, signal=67%
GO_REGULATION_OF_RESPONSE_TO_INTERFERON_GAMMA	21	0.0660339	0.365386	1	0.999914	1	7627	tags=62%, list=55%, signal=138%

## Sheet: BP_Down
Supplementary Table 5. GSEA results (C5-CC, C5-BP, and C5-MF domains) for W3-HM Shank2-mutant transcripts.
NAME	SIZE	ES	NES	NOM p-val	FDR q-val	FWER p-val	RANK AT MAX	LEADING EDGE
GO_LIPID_CATABOLIC_PROCESS	235	-0.227596	-4.00655	0	0	0	5249	tags=60%, list=38%, signal=96%
GO_MONOVALENT_INORGANIC_CATION_TRANSPORT	418	-0.146733	-3.42365	0	0	0	6056	tags=58%, list=44%, signal=101%
GO_CELLULAR_LIPID_CATABOLIC_PROCESS	164	-0.217986	-3.30636	0	0	0	3001	tags=43%, list=22%, signal=55%
GO_CELLULAR_RESPIRATION	180	-0.211431	-3.26352	0	0	0	7160	tags=73%, list=52%, signal=149%
GO_SMALL_MOLECULE_CATABOLIC_PROCESS	313	-0.151348	-3.09416	0	0.000371133	0.002	5848	tags=57%, list=42%, signal=97%
GO_RESPIRATORY_ELECTRON_TRANSPORT_CHAIN	108	-0.242048	-3.04596	0	0.000460226	0.003	7160	tags=76%, list=52%, signal=157%
GO_ANION_TRANSPORT	454	-0.120802	-3.03744	0	0.000394479	0.003	5498	tags=52%, list=40%, signal=83%
GO_PROTON_TRANSMEMBRANE_TRANSPORT	130	-0.227334	-2.99193	0	0.000461534	0.004	6443	tags=69%, list=47%, signal=129%
GO_OXIDATIVE_PHOSPHORYLATION	128	-0.233056	-2.9866	0	0.000620822	0.006	7160	tags=75%, list=52%, signal=155%
GO_GENERATION_OF_PRECURSOR_METABOLITES_AND_ENERGY	433	-0.122142	-2.98392	0	0.000558739	0.006	7160	tags=64%, list=52%, signal=128%
GO_ENERGY_DERIVATION_BY_OXIDATION_OF_ORGANIC_COMPOUNDS	254	-0.161024	-2.98148	0	0.000507945	0.006	7160	tags=68%, list=52%, signal=138%
GO_ELECTRON_TRANSPORT_CHAIN	164	-0.198963	-2.97233	0	0.000465616	0.006	9483	tags=88%, list=69%, signal=280%
GO_LIPOSACCHARIDE_METABOLIC_PROCESS	47	-0.364815	-2.96583	0	0.000500933	0.007	6724	tags=85%, list=49%, signal=166%
GO_ORGANIC_ACID_CATABOLIC_PROCESS	202	-0.176984	-2.94812	0	0.000532282	0.008	5379	tags=56%, list=39%, signal=91%
GO_PURINE_CONTAINING_COMPOUND_BIOSYNTHETIC_PROCESS	174	-0.188642	-2.94376	0	0.00055831	0.009	6547	tags=66%, list=47%, signal=124%
GO_COFACTOR_BIOSYNTHETIC_PROCESS	182	-0.180066	-2.86014	0	0.000992465	0.017	6795	tags=67%, list=49%, signal=130%
GO_ENERGY_COUPLED_PROTON_TRANSMEMBRANE_TRANSPORT_AGAINST_ELECTROCHEMICAL_GRADIENT	29	-0.439504	-2.82072	0	0.00137368	0.025	7268	tags=97%, list=53%, signal=204%
GO_MEMBRANE_LIPID_METABOLIC_PROCESS	186	-0.174266	-2.80552	0	0.00145304	0.028	7788	tags=74%, list=56%, signal=167%
GO_COFACTOR_METABOLIC_PROCESS	347	-0.132947	-2.80034	0	0.00152372	0.031	6838	tags=63%, list=50%, signal=121%
GO_MONOCARBOXYLIC_ACID_CATABOLIC_PROCESS	103	-0.234678	-2.79024	0	0.00163483	0.034	5224	tags=61%, list=38%, signal=98%
GO_ORGANOPHOSPHATE_ESTER_TRANSPORT	83	-0.258008	-2.72397	0	0.00288296	0.061	5769	tags=67%, list=42%, signal=115%
GO_MONOSACCHARIDE_METABOLIC_PROCESS	127	-0.20472	-2.70877	0	0.00304816	0.068	5348	tags=59%, list=39%, signal=96%
GO_ATP_HYDROLYSIS_COUPLED_TRANSMEMBRANE_TRANSPORT	28	-0.438238	-2.69815	0	0.00315747	0.072	7268	tags=96%, list=53%, signal=203%
GO_ORGANIC_ANION_TRANSPORT	361	-0.122147	-2.69476	0	0.00310239	0.074	5810	tags=54%, list=42%, signal=91%
GO_POTASSIUM_ION_TRANSPORT	195	-0.167555	-2.68021	0	0.00357283	0.088	4088	tags=46%, list=30%, signal=65%
GO_FATTY_ACID_CATABOLIC_PROCESS	90	-0.233912	-2.6453	0	0.00429498	0.109	5224	tags=61%, list=38%, signal=98%
GO_ATP_SYNTHESIS_COUPLED_ELECTRON_TRANSPORT	90	-0.238002	-2.63522	0	0.00434255	0.115	7160	tags=76%, list=52%, signal=156%
GO_RESPONSE_TO_ELECTRICAL_STIMULUS	35	-0.376548	-2.58195	0	0.00618629	0.167	5854	tags=80%, list=42%, signal=139%
GO_NUCLEOSIDE_BISPHOSPHATE_BIOSYNTHETIC_PROCESS	63	-0.272249	-2.57239	0	0.0065845	0.183	6771	tags=76%, list=49%, signal=149%
GO_SENSORY_PERCEPTION	350	-0.118841	-2.56231	0	0.0069856	0.201	3132	tags=34%, list=23%, signal=43%
GO_RIBOSE_PHOSPHATE_BIOSYNTHETIC_PROCESS	167	-0.168097	-2.55535	0	0.0071222	0.208	6547	tags=64%, list=47%, signal=121%
GO_CHLORIDE_TRANSMEMBRANE_TRANSPORT	61	-0.267778	-2.51688	0	0.00887578	0.261	8985	tags=92%, list=65%, signal=262%
GO_GLUCOSE_METABOLIC_PROCESS	95	-0.217321	-2.51286	0.0020202	0.00900231	0.273	5154	tags=59%, list=37%, signal=93%
GO_MONOCARBOXYLIC_ACID_METABOLIC_PROCESS	338	-0.117518	-2.51021	0	0.00890176	0.278	6866	tags=61%, list=50%, signal=119%
GO_INORGANIC_ANION_TRANSPORT	123	-0.186023	-2.49994	0	0.00915184	0.29	9007	tags=84%, list=65%, signal=239%
GO_ATP_HYDROLYSIS_COUPLED_CATION_TRANSMEMBRANE_TRANSPORT	50	-0.294129	-2.49808	0	0.00902641	0.294	7268	tags=82%, list=53%, signal=173%
GO_POTASSIUM_ION_HOMEOSTASIS	22	-0.433061	-2.46505	0	0.0113182	0.352	4068	tags=73%, list=29%, signal=103%
GO_SPHINGOLIPID_METABOLIC_PROCESS	69	-0.256456	-2.46269	0	0.0112636	0.357	7075	tags=77%, list=51%, signal=157%
GO_MAINTENANCE_OF_LOCATION_IN_CELL	82	-0.227657	-2.45445	0.00204918	0.0114783	0.369	3271	tags=46%, list=24%, signal=60%
GO_GLIAL_CELL_DIFFERENTIATION	190	-0.152365	-2.44856	0	0.0117521	0.382	2937	tags=36%, list=21%, signal=46%
GO_CARBOHYDRATE_DERIVATIVE_CATABOLIC_PROCESS	151	-0.170046	-2.44329	0	0.0118746	0.393	7454	tags=71%, list=54%, signal=153%
GO_INORGANIC_ANION_TRANSMEMBRANE_TRANSPORT	80	-0.237438	-2.43717	0	0.0119706	0.399	8985	tags=89%, list=65%, signal=253%
GO_PHAGOSOME_MATURATION	37	-0.338836	-2.4261	0.00210084	0.012494	0.422	7268	tags=86%, list=53%, signal=182%
GO_ORGANIC_CATION_TRANSPORT	26	-0.39663	-2.39571	0.00199601	0.0152368	0.503	4089	tags=69%, list=30%, signal=98%
GO_RESPONSE_TO_INORGANIC_SUBSTANCE	460	-0.098084	-2.38869	0	0.0156626	0.518	3970	tags=38%, list=29%, signal=52%
GO_FATTY_ACID_METABOLIC_PROCESS	202	-0.145168	-2.37083	0	0.0172201	0.568	3968	tags=43%, list=29%, signal=60%
GO_TRANSFERRIN_TRANSPORT	32	-0.344802	-2.36589	0	0.0173677	0.576	7324	tags=88%, list=53%, signal=186%
GO_ENSHEATHMENT_OF_NEURONS	120	-0.182697	-2.35485	0	0.0182596	0.606	4169	tags=48%, list=30%, signal=69%
GO_THIOESTER_BIOSYNTHETIC_PROCESS	48	-0.280911	-2.33196	0	0.020947	0.671	6771	tags=77%, list=49%, signal=151%
GO_LONG_CHAIN_FATTY_ACID_METABOLIC_PROCESS	59	-0.255762	-2.30208	0	0.0250134	0.752	3735	tags=53%, list=27%, signal=72%
GO_SODIUM_ION_TRANSPORT	164	-0.153934	-2.30118	0.00201613	0.0247049	0.754	2192	tags=31%, list=16%, signal=37%
GO_PHAGOSOME_ACIDIFICATION	21	-0.426092	-2.29061	0	0.0260916	0.78	7268	tags=95%, list=53%, signal=201%
GO_POTASSIUM_ION_IMPORT_ACROSS_PLASMA_MEMBRANE	38	-0.309764	-2.27514	0.00588235	0.0286084	0.819	4088	tags=61%, list=30%, signal=86%
GO_WALKING_BEHAVIOR	27	-0.361773	-2.27029	0.00204499	0.0288724	0.827	7791	tags=93%, list=56%, signal=212%
GO_ORGANIC_ACID_TRANSPORT	252	-0.126052	-2.26572	0.00191939	0.0291431	0.831	3767	tags=40%, list=27%, signal=54%
GO_GLIOGENESIS	250	-0.12538	-2.2625	0	0.0293841	0.836	2937	tags=34%, list=21%, signal=42%
GO_CELLULAR_CARBOHYDRATE_CATABOLIC_PROCESS	36	-0.319332	-2.26145	0.00393701	0.0290475	0.837	6718	tags=81%, list=49%, signal=157%
GO_DRUG_METABOLIC_PROCESS	235	-0.126305	-2.25496	0	0.0296063	0.848	4216	tags=43%, list=31%, signal=61%
GO_IRON_ION_TRANSPORT	61	-0.242469	-2.253	0.00184843	0.0294805	0.85	7976	tags=82%, list=58%, signal=194%
GO_CIRCULATORY_SYSTEM_PROCESS	415	-0.0952115	-2.24013	0.0021692	0.0313627	0.864	3978	tags=38%, list=29%, signal=52%
GO_POSITIVE_REGULATION_OF_LIPID_METABOLIC_PROCESS	101	-0.188614	-2.22331	0.00191571	0.0344973	0.882	5475	tags=58%, list=40%, signal=96%
GO_OLIGODENDROCYTE_DIFFERENTIATION	87	-0.204803	-2.22329	0.00205339	0.0339409	0.882	2901	tags=41%, list=21%, signal=52%
GO_NEUROTRANSMITTER_CATABOLIC_PROCESS	17	-0.450982	-2.21443	0.00208333	0.0355897	0.904	3524	tags=71%, list=26%, signal=95%
GO_SENSORY_PERCEPTION_OF_MECHANICAL_STIMULUS	125	-0.169476	-2.20751	0.00212766	0.0368469	0.91	3422	tags=42%, list=25%, signal=55%
GO_LIPID_OXIDATION	92	-0.197546	-2.20382	0.00579151	0.036996	0.914	3141	tags=42%, list=23%, signal=55%
GO_MITOCHONDRIAL_FUSION	21	-0.39835	-2.19812	0	0.037715	0.925	7650	tags=95%, list=55%, signal=214%
GO_AEROBIC_RESPIRATION	82	-0.204403	-2.19504	0	0.037694	0.926	7458	tags=74%, list=54%, signal=161%
GO_RESPONSE_TO_METAL_ION	308	-0.108037	-2.19448	0	0.0372492	0.926	4007	tags=40%, list=29%, signal=55%
GO_PH_REDUCTION	42	-0.289876	-2.19199	0	0.0371818	0.928	7508	tags=83%, list=54%, signal=182%
GO_MONOVALENT_INORGANIC_CATION_HOMEOSTASIS	117	-0.176234	-2.19077	0	0.0368767	0.931	4192	tags=48%, list=30%, signal=68%
GO_SODIUM_ION_TRANSMEMBRANE_TRANSPORT	107	-0.183073	-2.18795	0	0.0371952	0.938	4198	tags=49%, list=30%, signal=69%
GO_STEROID_CATABOLIC_PROCESS	16	-0.454029	-2.16926	0	0.041275	0.958	4090	tags=75%, list=30%, signal=106%
GO_SULFUR_COMPOUND_BIOSYNTHETIC_PROCESS	155	-0.150221	-2.16496	0.00207039	0.0419563	0.961	6850	tags=65%, list=50%, signal=127%
GO_GLIAL_CELL_DEVELOPMENT	101	-0.181423	-2.16234	0.00210084	0.0421209	0.966	4208	tags=49%, list=31%, signal=69%
GO_STEROL_METABOLIC_PROCESS	69	-0.220107	-2.15417	0.00200401	0.0439623	0.971	4176	tags=52%, list=30%, signal=74%
GO_POSITIVE_REGULATION_OF_ANION_TRANSPORT	39	-0.287175	-2.1498	0	0.0447432	0.973	5953	tags=72%, list=43%, signal=126%
GO_REGULATION_OF_BLOOD_PRESSURE	122	-0.166073	-2.14774	0.00406504	0.0447906	0.973	3383	tags=41%, list=25%, signal=54%
GO_ACIDIC_AMINO_ACID_TRANSPORT	58	-0.241951	-2.14463	0.002	0.0450972	0.975	5476	tags=64%, list=40%, signal=105%
GO_CERAMIDE_CATABOLIC_PROCESS	17	-0.430782	-2.12106	0	0.0518619	0.987	2991	tags=65%, list=22%, signal=83%
GO_MITOCHONDRIAL_ELECTRON_TRANSPORT_NADH_TO_UBIQUINONE	51	-0.25012	-2.1194	0.00205339	0.0517498	0.988	6840	tags=75%, list=50%, signal=147%
GO_REGULATION_OF_ANION_TRANSPORT	77	-0.204381	-2.10494	0.00402414	0.0560843	0.991	5616	tags=61%, list=41%, signal=102%
GO_SULFUR_COMPOUND_TRANSPORT	35	-0.296012	-2.10434	0.00582524	0.055582	0.991	8932	tags=94%, list=65%, signal=267%
GO_HORMONE_METABOLIC_PROCESS	132	-0.158607	-2.09971	0.00199203	0.056547	0.994	5148	tags=53%, list=37%, signal=84%
GO_FATTY_ACID_BETA_OXIDATION	67	-0.221151	-2.09769	0	0.0565387	0.994	3141	tags=45%, list=23%, signal=58%
GO_NUCLEOSIDE_PHOSPHATE_BIOSYNTHETIC_PROCESS	240	-0.119082	-2.0803	0.00211416	0.0624628	0.998	6547	tags=59%, list=47%, signal=111%
GO_COENZYME_BIOSYNTHETIC_PROCESS	128	-0.159637	-2.0789	0.00204918	0.0622018	0.998	6547	tags=63%, list=47%, signal=119%
GO_INORGANIC_ION_IMPORT_ACROSS_PLASMA_MEMBRANE	67	-0.212141	-2.07465	0	0.0631435	0.998	4088	tags=51%, list=30%, signal=72%
GO_PHOSPHOLIPID_TRANSPORT	63	-0.222292	-2.0703	0.00203252	0.0643019	0.998	7019	tags=73%, list=51%, signal=148%
GO_CHLORIDE_TRANSPORT	77	-0.196067	-2.06587	0	0.0656304	0.998	9133	tags=86%, list=66%, signal=252%
GO_NEUROMUSCULAR_PROCESS	87	-0.190141	-2.06548	0.00208768	0.0650675	0.998	3736	tags=46%, list=27%, signal=63%
GO_ORGANOPHOSPHATE_CATABOLIC_PROCESS	114	-0.162874	-2.05807	0	0.0673566	0.999	4064	tags=46%, list=29%, signal=64%
GO_CEREBELLAR_CORTEX_MORPHOGENESIS	28	-0.327345	-2.04372	0.00413223	0.0725562	1	5839	tags=75%, list=42%, signal=130%
GO_REGULATION_OF_FATTY_ACID_METABOLIC_PROCESS	43	-0.263103	-2.04051	0	0.0730476	1	3119	tags=49%, list=23%, signal=63%
GO_COENZYME_METABOLIC_PROCESS	214	-0.120993	-2.02736	0.00625	0.078412	1	6156	tags=57%, list=45%, signal=101%
GO_POSITIVE_REGULATION_OF_POTASSIUM_ION_TRANSMEMBRANE_TRANSPORTER_ACTIVITY	21	-0.363139	-2.02665	0	0.0779473	1	5508	tags=76%, list=40%, signal=127%
GO_MEMBRANE_LIPID_CATABOLIC_PROCESS	28	-0.319555	-2.02082	0	0.079721	1	2991	tags=54%, list=22%, signal=68%
GO_MAINTENANCE_OF_LOCATION	268	-0.106338	-2.01473	0.00196078	0.0820069	1	2937	tags=32%, list=21%, signal=40%
GO_FATTY_ACID_TRANSPORT	69	-0.20678	-2.01061	0.00390625	0.0832343	1	4159	tags=51%, list=30%, signal=72%
GO_FATTY_ACYL_COA_BIOSYNTHETIC_PROCESS	27	-0.32455	-2.00564	0.00588235	0.08502	1	6771	tags=81%, list=49%, signal=160%
GO_OLIGODENDROCYTE_DEVELOPMENT	42	-0.259338	-2.00341	0.00986193	0.0854721	1	5301	tags=64%, list=38%, signal=104%
GO_GLYCEROLIPID_CATABOLIC_PROCESS	40	-0.266142	-2.00094	0.00378788	0.085809	1	2892	tags=48%, list=21%, signal=60%
GO_ORGANOPHOSPHATE_BIOSYNTHETIC_PROCESS	495	-0.0796353	-1.9994	0.00610998	0.0858339	1	6771	tags=57%, list=49%, signal=108%
GO_REGULATION_OF_MEMBRANE_LIPID_DISTRIBUTION	37	-0.275641	-1.9984	0.0056391	0.085579	1	7019	tags=78%, list=51%, signal=159%
GO_LOCOMOTORY_BEHAVIOR	167	-0.130994	-1.9972	0.00809717	0.0853622	1	3997	tags=42%, list=29%, signal=58%
GO_NUCLEOTIDE_TRANSPORT	17	-0.405786	-1.99085	0.0100402	0.0878572	1	5769	tags=82%, list=42%, signal=141%
GO_CELLULAR_COMPONENT_MAINTENANCE	50	-0.235906	-1.97508	0.00389105	0.0956556	1	2000	tags=38%, list=15%, signal=44%
GO_POSITIVE_REGULATION_OF_ORGANIC_ACID_TRANSPORT	25	-0.323807	-1.97309	0.00610998	0.0958834	1	5473	tags=72%, list=40%, signal=119%
GO_CERAMIDE_BIOSYNTHETIC_PROCESS	56	-0.22202	-1.96961	0.00821355	0.0969976	1	6556	tags=70%, list=48%, signal=132%
GO_PIGMENT_BIOSYNTHETIC_PROCESS	49	-0.2329	-1.96669	0.00421941	0.0975682	1	7777	tags=80%, list=56%, signal=182%
GO_DICARBOXYLIC_ACID_TRANSPORT	78	-0.186317	-1.96486	0.00567108	0.0975848	1	5756	tags=60%, list=42%, signal=103%
GO_SULFUR_COMPOUND_CATABOLIC_PROCESS	40	-0.264872	-1.96413	0.00407332	0.0970987	1	6702	tags=75%, list=49%, signal=145%
GO_MAINTENANCE_OF_PROTEIN_LOCATION_IN_CELL	66	-0.203255	-1.95892	0.00607287	0.0995276	1	3271	tags=44%, list=24%, signal=57%
GO_EXTRACELLULAR_MATRIX_ASSEMBLY	24	-0.332807	-1.95398	0.0100402	0.101777	1	3464	tags=58%, list=25%, signal=78%
GO_VENTRICULAR_CARDIAC_MUSCLE_TISSUE_DEVELOPMENT	43	-0.25715	-1.95013	0	0.103078	1	4163	tags=56%, list=30%, signal=80%
GO_MEIOSIS_I_CELL_CYCLE_PROCESS	83	-0.182028	-1.94773	0.00831601	0.103554	1	7309	tags=71%, list=53%, signal=150%
GO_PERIPHERAL_NERVOUS_SYSTEM_DEVELOPMENT	65	-0.206073	-1.94712	0.01002	0.103006	1	1628	tags=32%, list=12%, signal=36%
GO_GLYCOLYTIC_PROCESS_THROUGH_FRUCTOSE_6_PHOSPHATE	24	-0.334732	-1.94684	0.004	0.102325	1	5736	tags=75%, list=42%, signal=128%
GO_CARBOHYDRATE_METABOLIC_PROCESS	456	-0.0800258	-1.9433	0.0059761	0.103363	1	5164	tags=45%, list=37%, signal=70%
GO_ORGANOPHOSPHATE_METABOLIC_PROCESS	443	-0.0805511	-1.94293	0.00414079	0.102683	1	5868	tags=50%, list=43%, signal=85%
GO_POSITIVE_REGULATION_OF_LIPID_BIOSYNTHETIC_PROCESS	56	-0.222564	-1.93928	0.00204918	0.104233	1	6056	tags=66%, list=44%, signal=117%
GO_POSITIVE_REGULATION_OF_TRANSPORTER_ACTIVITY	93	-0.169003	-1.93884	0.00769231	0.103633	1	2283	tags=33%, list=17%, signal=40%
GO_RESPONSE_TO_INSULIN	228	-0.110655	-1.93356	0.00408163	0.105979	1	8541	tags=73%, list=62%, signal=188%
GO_NADH_DEHYDROGENASE_COMPLEX_ASSEMBLY	60	-0.212359	-1.92449	0.00814664	0.110879	1	9497	tags=90%, list=69%, signal=288%
GO_MEMBRANE_LIPID_BIOSYNTHETIC_PROCESS	135	-0.140435	-1.91472	0.00986193	0.116196	1	7788	tags=70%, list=56%, signal=160%
GO_SUBSTANTIA_NIGRA_DEVELOPMENT	38	-0.263016	-1.91226	0.0132075	0.116875	1	4368	tags=58%, list=32%, signal=84%
GO_REGULATION_OF_MACROPHAGE_DERIVED_FOAM_CELL_DIFFERENTIATION	19	-0.357545	-1.9102	0.00393701	0.117261	1	3787	tags=63%, list=27%, signal=87%
GO_CELL_VOLUME_HOMEOSTASIS	24	-0.330673	-1.90505	0.00970874	0.119907	1	4068	tags=63%, list=29%, signal=88%
GO_REGULATION_OF_TRANSPORTER_ACTIVITY	236	-0.108359	-1.90429	0.006	0.119443	1	2389	tags=28%, list=17%, signal=33%
GO_REGULATION_OF_ION_TRANSMEMBRANE_TRANSPORT	395	-0.0825423	-1.90203	0.0139442	0.120103	1	2247	tags=24%, list=16%, signal=28%
GO_PYRIMIDINE_CONTAINING_COMPOUND_METABOLIC_PROCESS	22	-0.336778	-1.90173	0.0135135	0.119444	1	4140	tags=64%, list=30%, signal=91%
GO_LIPOPROTEIN_BIOSYNTHETIC_PROCESS	88	-0.173317	-1.90091	0.00404858	0.119079	1	8126	tags=76%, list=59%, signal=184%
GO_REGULATION_OF_HORMONE_LEVELS	362	-0.0861412	-1.89948	0.00568182	0.119156	1	5854	tags=51%, list=42%, signal=86%
GO_TRANSITION_METAL_ION_TRANSPORT	103	-0.159513	-1.89449	0.0149254	0.121393	1	7324	tags=69%, list=53%, signal=146%
GO_MUSCLE_ORGAN_MORPHOGENESIS	60	-0.208368	-1.89446	0.016129	0.120515	1	3116	tags=43%, list=23%, signal=56%
GO_CARBOHYDRATE_BIOSYNTHETIC_PROCESS	173	-0.121657	-1.89326	0.0116054	0.120421	1	3207	tags=35%, list=23%, signal=45%
GO_SENSORY_PERCEPTION_OF_LIGHT_STIMULUS	130	-0.13774	-1.88788	0.00873363	0.123169	1	5227	tags=52%, list=38%, signal=82%
GO_AMINO_ACID_TRANSPORT	121	-0.143726	-1.88649	0.0130597	0.123194	1	3849	tags=42%, list=28%, signal=58%
GO_TRICARBOXYLIC_ACID_CYCLE	33	-0.271089	-1.88164	0.0137525	0.125526	1	7137	tags=79%, list=52%, signal=163%
GO_VACUOLAR_ACIDIFICATION	21	-0.34127	-1.8763	0.00952381	0.128356	1	8436	tags=95%, list=61%, signal=245%
GO_MUSCLE_ADAPTATION	90	-0.164409	-1.87121	0.00400802	0.131071	1	4031	tags=46%, list=29%, signal=64%
GO_GOLGI_TO_PLASMA_MEMBRANE_PROTEIN_TRANSPORT	35	-0.267634	-1.86805	0.0137255	0.132402	1	4200	tags=57%, list=30%, signal=82%
GO_ATP_BIOSYNTHETIC_PROCESS	39	-0.255353	-1.86576	0.00590551	0.133272	1	6037	tags=69%, list=44%, signal=123%
GO_ACID_SECRETION	87	-0.170708	-1.85504	0.00978474	0.140272	1	5746	tags=59%, list=42%, signal=100%
GO_MONOCARBOXYLIC_ACID_TRANSPORT	118	-0.146421	-1.85218	0.0126582	0.141349	1	4427	tags=47%, list=32%, signal=68%
GO_NEGATIVE_REGULATION_OF_LIPID_STORAGE	15	-0.390926	-1.84689	0.0102669	0.144712	1	4729	tags=73%, list=34%, signal=111%
GO_CARBOHYDRATE_DERIVATIVE_TRANSPORT	58	-0.203301	-1.83765	0.0149254	0.151037	1	5769	tags=62%, list=42%, signal=106%
GO_RESPONSE_TO_COPPER_ION	31	-0.280254	-1.8365	0.0159363	0.150933	1	5487	tags=68%, list=40%, signal=112%
GO_REGULATION_OF_SYSTEMIC_ARTERIAL_BLOOD_PRESSURE	60	-0.197411	-1.83378	0.0104384	0.152131	1	3956	tags=48%, list=29%, signal=67%
GO_RESPONSE_TO_CORTICOSTEROID	126	-0.139608	-1.83193	0.0182556	0.15277	1	2143	tags=29%, list=16%, signal=34%
GO_AEROBIC_ELECTRON_TRANSPORT_CHAIN	19	-0.337313	-1.83051	0.00793651	0.153005	1	6969	tags=84%, list=51%, signal=170%
GO_EXPORT_ACROSS_PLASMA_MEMBRANE	23	-0.317122	-1.83035	0.00595238	0.152104	1	4629	tags=65%, list=34%, signal=98%
GO_POSITIVE_REGULATION_OF_ASTROCYTE_DIFFERENTIATION	15	-0.386847	-1.82984	0.0143737	0.151484	1	2027	tags=53%, list=15%, signal=62%
GO_RIBONUCLEOSIDE_TRIPHOSPHATE_BIOSYNTHETIC_PROCESS	54	-0.211299	-1.82866	0.0093985	0.151491	1	6037	tags=65%, list=44%, signal=115%
GO_SODIUM_ION_HOMEOSTASIS	31	-0.282099	-1.82738	0.00835073	0.151564	1	4127	tags=58%, list=30%, signal=83%
GO_PEPTIDE_HORMONE_PROCESSING	22	-0.325147	-1.82736	0.0199601	0.150599	1	4927	tags=68%, list=36%, signal=106%
GO_NEGATIVE_REGULATION_OF_GROWTH	201	-0.111654	-1.82688	0.0198413	0.150064	1	6374	tags=57%, list=46%, signal=105%
GO_RESPONSE_TO_TOXIC_SUBSTANCE	400	-0.0807645	-1.82235	0.01002	0.152727	1	5022	tags=44%, list=36%, signal=68%
GO_ANION_TRANSMEMBRANE_TRANSPORT	215	-0.107243	-1.81436	0.0236686	0.158321	1	9193	tags=77%, list=67%, signal=228%
GO_MODIFIED_AMINO_ACID_TRANSPORT	16	-0.386456	-1.8127	0.0100402	0.158646	1	2435	tags=56%, list=18%, signal=68%
GO_PHOSPHOLIPID_METABOLIC_PROCESS	216	-0.106118	-1.8126	0.0192678	0.157724	1	4179	tags=41%, list=30%, signal=58%
GO_REGULATION_OF_CELLULAR_CARBOHYDRATE_METABOLIC_PROCESS	93	-0.161382	-1.80574	0.0182556	0.162468	1	3722	tags=43%, list=27%, signal=59%
GO_MEMBRANE_DEPOLARIZATION_DURING_CARDIAC_MUSCLE_CELL_ACTION_POTENTIAL	21	-0.326299	-1.80248	0.0186722	0.16422	1	2075	tags=48%, list=15%, signal=56%
GO_MULTIVESICULAR_BODY_SORTING_PATHWAY	32	-0.269135	-1.80231	0.018	0.163378	1	9658	tags=97%, list=70%, signal=323%
GO_RESPONSE_TO_ACTIVITY	53	-0.20424	-1.80182	0.0179641	0.162774	1	5782	tags=62%, list=42%, signal=107%
GO_LONG_CHAIN_FATTY_ACYL_COA_BIOSYNTHETIC_PROCESS	17	-0.366727	-1.80049	0.0143443	0.163088	1	6307	tags=82%, list=46%, signal=152%
GO_ORGANIC_HYDROXY_COMPOUND_METABOLIC_PROCESS	358	-0.0836808	-1.79887	0.0246914	0.16345	1	4193	tags=39%, list=30%, signal=54%
GO_REGULATION_OF_MITOCHONDRIAL_MEMBRANE_POTENTIAL	62	-0.195374	-1.79674	0.0135135	0.164376	1	6661	tags=68%, list=48%, signal=130%
GO_SKELETAL_MUSCLE_ADAPTATION	20	-0.336246	-1.79598	0.0178218	0.163951	1	8472	tags=95%, list=61%, signal=246%
GO_REGULATION_OF_MEMBRANE_POTENTIAL	361	-0.0821962	-1.79122	0.0197628	0.167403	1	3978	tags=37%, list=29%, signal=50%
GO_MUSCLE_SYSTEM_PROCESS	351	-0.0836501	-1.79059	0.0146138	0.167025	1	3238	tags=32%, list=23%, signal=40%
GO_REGULATION_OF_GLUCOSE_METABOLIC_PROCESS	59	-0.193027	-1.79036	0.0251046	0.16625	1	3194	tags=42%, list=23%, signal=55%
GO_NUCLEOBASE_CONTAINING_SMALL_MOLECULE_BIOSYNTHETIC_PROCESS	92	-0.163495	-1.78611	0.0160966	0.169235	1	5856	tags=59%, list=42%, signal=101%
GO_NEGATIVE_REGULATION_OF_CELL_GROWTH	154	-0.124328	-1.78573	0.0163599	0.168601	1	6007	tags=56%, list=44%, signal=98%
GO_REGULATION_OF_PLASMA_LIPOPROTEIN_PARTICLE_LEVELS	60	-0.195656	-1.78418	0.00840336	0.169033	1	7198	tags=72%, list=52%, signal=149%
GO_CARBOHYDRATE_HOMEOSTASIS	191	-0.109627	-1.78246	0.0172745	0.169529	1	4142	tags=41%, list=30%, signal=58%
GO_REGULATION_OF_TRANSMEMBRANE_TRANSPORT	456	-0.0720329	-1.78219	0.0251046	0.168793	1	2216	tags=23%, list=16%, signal=27%
GO_SULFUR_COMPOUND_METABOLIC_PROCESS	154	-0.126417	-1.77173	0.024	0.177126	1	7680	tags=68%, list=56%, signal=152%
GO_FATTY_ACID_DERIVATIVE_BIOSYNTHETIC_PROCESS	46	-0.227249	-1.77023	0.0195312	0.177608	1	6771	tags=72%, list=49%, signal=140%
GO_COFACTOR_TRANSPORT	34	-0.255382	-1.76957	0.0133588	0.177312	1	7845	tags=82%, list=57%, signal=191%
GO_REGULATION_OF_NUCLEOTIDE_BIOSYNTHETIC_PROCESS	31	-0.265491	-1.76905	0.0269231	0.176735	1	6135	tags=71%, list=44%, signal=128%
GO_REGULATION_OF_ORGANIC_ACID_TRANSPORT	46	-0.217235	-1.76898	0.0294118	0.17582	1	3311	tags=46%, list=24%, signal=60%
GO_LIPID_MODIFICATION	205	-0.104348	-1.76156	0.0287474	0.181921	1	4167	tags=40%, list=30%, signal=57%
GO_POSITIVE_REGULATION_OF_POTASSIUM_ION_TRANSPORT	42	-0.229326	-1.7581	0.0294695	0.184166	1	6042	tags=67%, list=44%, signal=118%
GO_TEMPERATURE_HOMEOSTASIS	147	-0.124008	-1.75724	0.014862	0.183989	1	4970	tags=48%, list=36%, signal=75%
GO_POSITIVE_REGULATION_OF_HEART_CONTRACTION	29	-0.277328	-1.75683	0.0160643	0.183382	1	6171	tags=72%, list=45%, signal=131%
GO_REGULATION_OF_POTASSIUM_ION_TRANSMEMBRANE_TRANSPORTER_ACTIVITY	47	-0.219028	-1.75254	0.0264151	0.186671	1	7554	tags=77%, list=55%, signal=169%
GO_ORGANIC_ACID_BIOSYNTHETIC_PROCESS	216	-0.10471	-1.74968	0.0144928	0.188487	1	6752	tags=59%, list=49%, signal=114%
GO_NEGATIVE_REGULATION_OF_LIPID_METABOLIC_PROCESS	54	-0.198661	-1.74335	0.030426	0.19369	1	6466	tags=67%, list=47%, signal=125%
GO_CELLULAR_ION_HOMEOSTASIS	496	-0.0687619	-1.74254	0.0174419	0.193482	1	4036	tags=36%, list=29%, signal=49%
GO_GLYCEROLIPID_BIOSYNTHETIC_PROCESS	198	-0.106156	-1.73998	0.0163934	0.19501	1	9354	tags=78%, list=68%, signal=240%
GO_CELLULAR_MODIFIED_AMINO_ACID_BIOSYNTHETIC_PROCESS	35	-0.246054	-1.73956	0.0262626	0.194326	1	6467	tags=71%, list=47%, signal=134%
GO_ACTIN_FILAMENT_BASED_MOVEMENT	120	-0.132576	-1.73879	0.0218254	0.194021	1	2096	tags=28%, list=15%, signal=33%
GO_MONOSACCHARIDE_BIOSYNTHETIC_PROCESS	72	-0.172188	-1.73745	0.0188679	0.1945	1	3385	tags=42%, list=25%, signal=55%
GO_PHOSPHATIDYLCHOLINE_BIOSYNTHETIC_PROCESS	33	-0.245622	-1.73727	0.019802	0.193642	1	4562	tags=58%, list=33%, signal=86%
GO_AMINE_CATABOLIC_PROCESS	16	-0.362645	-1.73314	0.0229446	0.196894	1	2763	tags=56%, list=20%, signal=70%
GO_GLYCOPROTEIN_CATABOLIC_PROCESS	17	-0.339595	-1.73233	0.0188285	0.196653	1	4247	tags=65%, list=31%, signal=93%
GO_MITOCHONDRION_MORPHOGENESIS	20	-0.315148	-1.7321	0.0229885	0.195876	1	8073	tags=90%, list=59%, signal=217%
GO_POSITIVE_REGULATION_OF_SODIUM_ION_TRANSPORT	31	-0.261032	-1.73048	0.0221328	0.196567	1	3972	tags=55%, list=29%, signal=77%
GO_REGULATION_OF_FATTY_ACID_OXIDATION	29	-0.269345	-1.72849	0.019305	0.197476	1	2952	tags=48%, list=21%, signal=61%
GO_LYSOSOME_LOCALIZATION	56	-0.194549	-1.72827	0.0280778	0.196694	1	9396	tags=88%, list=68%, signal=273%
GO_FATTY_ACID_BIOSYNTHETIC_PROCESS	108	-0.142287	-1.72811	0.0238569	0.195891	1	6865	tags=64%, list=50%, signal=126%
GO_AXON_ENSHEATHMENT_IN_CENTRAL_NERVOUS_SYSTEM	20	-0.31615	-1.72754	0.0135397	0.195465	1	5301	tags=70%, list=38%, signal=114%
GO_LINOLEIC_ACID_METABOLIC_PROCESS	15	-0.369352	-1.72728	0.0196464	0.194739	1	6865	tags=87%, list=50%, signal=172%
GO_SERINE_FAMILY_AMINO_ACID_BIOSYNTHETIC_PROCESS	16	-0.359859	-1.72452	0.0250965	0.196671	1	7973	tags=94%, list=58%, signal=222%
GO_MITOCHONDRIAL_RESPIRATORY_CHAIN_COMPLEX_ASSEMBLY	91	-0.153461	-1.72237	0.0218254	0.197934	1	6840	tags=65%, list=50%, signal=128%
GO_C4_DICARBOXYLATE_TRANSPORT	20	-0.32233	-1.72051	0.037037	0.198883	1	6595	tags=80%, list=48%, signal=153%
GO_REGULATION_OF_PROTEIN_DEPOLYMERIZATION	72	-0.173941	-1.71826	0.0233463	0.200191	1	5851	tags=60%, list=42%, signal=103%
GO_GLUTAMATE_SECRETION	38	-0.235447	-1.71801	0.0174757	0.199511	1	5473	tags=63%, list=40%, signal=104%
GO_CELLULAR_RESPONSE_TO_INSULIN_STIMULUS	182	-0.107448	-1.71794	0.0277228	0.198628	1	8541	tags=73%, list=62%, signal=188%
GO_MYELIN_ASSEMBLY	19	-0.33536	-1.71753	0.039916	0.198082	1	1915	tags=47%, list=14%, signal=55%
GO_UNSATURATED_FATTY_ACID_METABOLIC_PROCESS	50	-0.207604	-1.71629	0.026694	0.198321	1	3768	tags=48%, list=27%, signal=66%
GO_NEGATIVE_REGULATION_OF_MITOCHONDRION_ORGANIZATION	46	-0.217138	-1.71481	0.0219124	0.198818	1	8409	tags=83%, list=61%, signal=211%
GO_BILE_ACID_METABOLIC_PROCESS	28	-0.272869	-1.71338	0.0341365	0.199373	1	3141	tags=50%, list=23%, signal=65%
GO_POSITIVE_REGULATION_OF_ION_TRANSPORT	209	-0.101237	-1.7106	0.0233918	0.201113	1	3245	tags=33%, list=24%, signal=43%
GO_GLYCEROLIPID_METABOLIC_PROCESS	186	-0.1074	-1.70974	0.0275049	0.200932	1	4249	tags=41%, list=31%, signal=59%
GO_CHEMOKINE_PRODUCTION	59	-0.190187	-1.70541	0.0245902	0.204467	1	3233	tags=42%, list=23%, signal=55%
GO_MITOCHONDRIAL_TRANSMEMBRANE_TRANSPORT	85	-0.154885	-1.70294	0.0258964	0.206002	1	5666	tags=56%, list=41%, signal=95%
GO_REGULATION_OF_SYSTEM_PROCESS	464	-0.0683216	-1.7016	0.0283976	0.206567	1	3311	tags=31%, list=24%, signal=39%
GO_LIVER_MORPHOGENESIS	15	-0.362689	-1.70129	0.0282258	0.205964	1	5118	tags=73%, list=37%, signal=116%
GO_NEGATIVE_REGULATION_OF_PEPTIDE_SECRETION	92	-0.152329	-1.70084	0.0321285	0.205476	1	1362	tags=25%, list=10%, signal=28%
GO_ORGANISM_EMERGENCE_FROM_PROTECTIVE_STRUCTURE	25	-0.284428	-1.69371	0.0268595	0.21194	1	7670	tags=84%, list=56%, signal=189%
GO_SENSORY_PERCEPTION_OF_SMELL	27	-0.272966	-1.69197	0.024948	0.212832	1	2884	tags=48%, list=21%, signal=61%
GO_PIGMENT_METABOLIC_PROCESS	57	-0.191331	-1.687	0.034	0.217112	1	7777	tags=75%, list=56%, signal=172%
GO_POSITIVE_REGULATION_OF_COLD_INDUCED_THERMOGENESIS	81	-0.159146	-1.68506	0.0219561	0.21809	1	4970	tags=52%, list=36%, signal=81%
GO_REGULATION_OF_INSULIN_LIKE_GROWTH_FACTOR_RECEPTOR_SIGNALING_PATHWAY	15	-0.361324	-1.68395	0.0340265	0.218336	1	3298	tags=60%, list=24%, signal=79%
GO_REGULATION_OF_POTASSIUM_ION_TRANSPORT	85	-0.156561	-1.68305	0.0215517	0.218473	1	7590	tags=71%, list=55%, signal=156%
GO_COLLAGEN_METABOLIC_PROCESS	16	-0.353131	-1.6736	0.0332031	0.228085	1	3756	tags=63%, list=27%, signal=86%
GO_ALCOHOL_METABOLIC_PROCESS	170	-0.109088	-1.67252	0.0366599	0.228456	1	4356	tags=42%, list=32%, signal=61%
GO_ERK1_AND_ERK2_CASCADE	218	-0.0982431	-1.66946	0.0258964	0.231132	1	5310	tags=48%, list=39%, signal=77%
GO_CELLULAR_CARBOHYDRATE_METABOLIC_PROCESS	213	-0.0955564	-1.66364	0.0241449	0.23682	1	3948	tags=38%, list=29%, signal=52%
GO_ASPARTATE_FAMILY_AMINO_ACID_CATABOLIC_PROCESS	19	-0.315407	-1.66361	0.0372671	0.235835	1	5819	tags=74%, list=42%, signal=127%
GO_PROTEIN_HOMOOLIGOMERIZATION	272	-0.0878143	-1.66211	0.0395833	0.236603	1	7129	tags=60%, list=52%, signal=122%
GO_ZYMOGEN_ACTIVATION	34	-0.237443	-1.66148	0.0358566	0.23625	1	3630	tags=50%, list=26%, signal=68%
GO_STRIATED_MUSCLE_ADAPTATION	38	-0.228494	-1.66094	0.0362903	0.23579	1	8472	tags=84%, list=61%, signal=218%
GO_NEUROTRANSMITTER_TRANSPORT	234	-0.0940596	-1.66039	0.0255403	0.235372	1	4089	tags=39%, list=30%, signal=54%
GO_RIBONUCLEOTIDE_CATABOLIC_PROCESS	28	-0.260595	-1.65874	0.0307377	0.23634	1	4295	tags=57%, list=31%, signal=83%
GO_RESPONSE_TO_PH	30	-0.257961	-1.65871	0.0295203	0.235386	1	2887	tags=47%, list=21%, signal=59%
GO_PROTEIN_LOCALIZATION_TO_CELL_PERIPHERY	285	-0.0840866	-1.65683	0.0459082	0.236605	1	4043	tags=38%, list=29%, signal=52%
GO_INDOLE_CONTAINING_COMPOUND_METABOLIC_PROCESS	15	-0.345528	-1.65473	0.0338645	0.238137	1	4435	tags=67%, list=32%, signal=98%
GO_POSITIVE_REGULATION_OF_PROTEIN_COMPLEX_DISASSEMBLY	31	-0.244217	-1.65465	0.0300601	0.237219	1	5538	tags=65%, list=40%, signal=108%
GO_VENTRAL_SPINAL_CORD_DEVELOPMENT	29	-0.260229	-1.65384	0.0359848	0.237227	1	3553	tags=52%, list=26%, signal=70%
GO_RESPONSE_TO_AMINO_ACID	96	-0.139403	-1.64136	0.03125	0.251136	1	5562	tags=54%, list=40%, signal=90%
GO_CARDIAC_MUSCLE_TISSUE_MORPHOGENESIS	50	-0.194834	-1.63972	0.0517241	0.252095	1	3116	tags=42%, list=23%, signal=54%
GO_DICARBOXYLIC_ACID_METABOLIC_PROCESS	51	-0.196549	-1.6395	0.0365112	0.251398	1	6224	tags=65%, list=45%, signal=117%
GO_POSITIVE_REGULATION_OF_AUTOPHAGY_OF_MITOCHONDRION	19	-0.309526	-1.63161	0.0444444	0.260015	1	5900	tags=74%, list=43%, signal=129%
GO_HINDBRAIN_MORPHOGENESIS	37	-0.225935	-1.6302	0.0438413	0.260761	1	5839	tags=65%, list=42%, signal=112%
GO_POSITIVE_REGULATION_OF_NUCLEOTIDE_BIOSYNTHETIC_PROCESS	17	-0.320318	-1.6274	0.0474308	0.263501	1	6135	tags=76%, list=44%, signal=138%
GO_IMPORT_ACROSS_PLASMA_MEMBRANE	93	-0.145489	-1.62441	0.0421687	0.266232	1	4088	tags=44%, list=30%, signal=62%
GO_MITOCHONDRIAL_CALCIUM_ION_HOMEOSTASIS	21	-0.29473	-1.62363	0.0360169	0.266085	1	1853	tags=43%, list=13%, signal=49%
GO_MITOCHONDRIAL_RNA_METABOLIC_PROCESS	21	-0.297323	-1.62338	0.0348837	0.265404	1	7071	tags=81%, list=51%, signal=166%
GO_REGULATION_OF_SYNCYTIUM_FORMATION_BY_PLASMA_MEMBRANE_FUSION	16	-0.327573	-1.62051	0.042885	0.268083	1	4970	tags=69%, list=36%, signal=107%
GO_PROTEIN_LOCALIZATION_TO_PLASMA_MEMBRANE	230	-0.0910373	-1.61682	0.0466019	0.272086	1	4043	tags=38%, list=29%, signal=53%
GO_ONE_CARBON_METABOLIC_PROCESS	20	-0.294423	-1.61601	0.0494071	0.27212	1	2842	tags=50%, list=21%, signal=63%
GO_REGULATION_OF_MYOTUBE_DIFFERENTIATION	36	-0.223404	-1.61598	0.0454545	0.2711	1	1142	tags=31%, list=8%, signal=33%
GO_SENSORY_PERCEPTION_OF_CHEMICAL_STIMULUS	46	-0.203646	-1.61587	0.039604	0.270147	1	4697	tags=54%, list=34%, signal=82%
GO_MONOVALENT_INORGANIC_ANION_HOMEOSTASIS	16	-0.334687	-1.61341	0.0430328	0.272377	1	4872	tags=69%, list=35%, signal=106%
GO_CELLULAR_MODIFIED_AMINO_ACID_METABOLIC_PROCESS	27	-0.258	-1.61337	0.0442656	0.271393	1	3090	tags=48%, list=22%, signal=62%
GO_REGULATION_OF_CARDIAC_CONDUCTION	62	-0.172163	-1.61	0.0487288	0.27462	1	4088	tags=47%, list=30%, signal=66%
GO_BRANCHED_CHAIN_AMINO_ACID_CATABOLIC_PROCESS	19	-0.307225	-1.60897	0.0391389	0.274963	1	4480	tags=63%, list=32%, signal=93%
GO_SIGNAL_RELEASE	377	-0.0712829	-1.60895	0.0383838	0.273941	1	7495	tags=61%, list=54%, signal=131%
GO_POSITIVE_REGULATION_OF_PROTEIN_DEPOLYMERIZATION	17	-0.322244	-1.60835	0.042	0.273722	1	4486	tags=65%, list=33%, signal=96%
GO_VESICLE_FUSION_TO_PLASMA_MEMBRANE	21	-0.292893	-1.60809	0.0289256	0.273025	1	7132	tags=81%, list=52%, signal=167%
GO_POSITIVE_REGULATION_OF_CARBOHYDRATE_METABOLIC_PROCESS	53	-0.189224	-1.60767	0.0401606	0.272616	1	3126	tags=42%, list=23%, signal=53%
GO_INSULIN_LIKE_GROWTH_FACTOR_RECEPTOR_SIGNALING_PATHWAY	28	-0.261462	-1.60695	0.0444444	0.272545	1	3298	tags=50%, list=24%, signal=66%
GO_SELECTIVE_AUTOPHAGY	43	-0.208384	-1.60606	0.0522244	0.272525	1	4192	tags=51%, list=30%, signal=73%
GO_CELLULAR_MONOVALENT_INORGANIC_CATION_HOMEOSTASIS	87	-0.145872	-1.6044	0.0453608	0.273726	1	7513	tags=69%, list=54%, signal=151%
GO_GLYCEROPHOSPHOLIPID_METABOLIC_PROCESS	144	-0.114915	-1.60315	0.0362173	0.27424	1	4179	tags=42%, list=30%, signal=59%
GO_INNER_EAR_RECEPTOR_CELL_DEVELOPMENT	35	-0.22407	-1.603	0.0425963	0.273414	1	1253	tags=31%, list=9%, signal=34%
GO_NEGATIVE_REGULATION_OF_CYCLIN_DEPENDENT_PROTEIN_KINASE_ACTIVITY	28	-0.256129	-1.60295	0.0480962	0.272463	1	4849	tags=61%, list=35%, signal=93%
GO_AMINOGLYCAN_CATABOLIC_PROCESS	54	-0.186657	-1.59859	0.0458167	0.277249	1	8674	tags=81%, list=63%, signal=219%
GO_HEART_PROCESS	239	-0.0897479	-1.59837	0.0543689	0.276528	1	3978	tags=38%, list=29%, signal=52%
GO_INTERMEDIATE_FILAMENT_BASED_PROCESS	36	-0.219393	-1.59729	0.0448065	0.276819	1	5028	tags=58%, list=36%, signal=92%
GO_SPHINGOLIPID_BIOSYNTHETIC_PROCESS	96	-0.140587	-1.59714	0.0483559	0.276016	1	7126	tags=66%, list=52%, signal=135%
GO_DETOXIFICATION	80	-0.152973	-1.59623	0.05	0.276115	1	8764	tags=79%, list=64%, signal=215%
GO_RESPONSE_TO_REACTIVE_OXYGEN_SPECIES	191	-0.0992805	-1.59556	0.0416667	0.275984	1	5799	tags=52%, list=42%, signal=88%
GO_REGULATION_OF_MAST_CELL_ACTIVATION_INVOLVED_IN_IMMUNE_RESPONSE	23	-0.27574	-1.59193	0.0490798	0.279553	1	9396	tags=96%, list=68%, signal=300%
GO_POSITIVE_REGULATION_OF_ERAD_PATHWAY	15	-0.339315	-1.59177	0.045283	0.278731	1	5440	tags=73%, list=39%, signal=121%
GO_NEGATIVE_REGULATION_OF_HORMONE_SECRETION	50	-0.186829	-1.5891	0.0578035	0.281207	1	3226	tags=42%, list=23%, signal=55%
GO_RESPONSE_TO_EXTRACELLULAR_STIMULUS	414	-0.0690792	-1.58875	0.04375	0.280653	1	10203	tags=81%, list=74%, signal=301%
GO_DRUG_TRANSPORT	153	-0.111199	-1.58865	0.0512821	0.27977	1	6056	tags=55%, list=44%, signal=97%
GO_NUCLEOSIDE_PHOSPHATE_CATABOLIC_PROCESS	65	-0.168655	-1.58738	0.0422535	0.280524	1	7658	tags=72%, list=56%, signal=162%
GO_METAL_ION_HOMEOSTASIS	487	-0.0626891	-1.58558	0.0506073	0.281932	1	4151	tags=36%, list=30%, signal=50%
GO_SEX_DETERMINATION	15	-0.338095	-1.58228	0.0549683	0.285272	1	8215	tags=93%, list=60%, signal=231%
GO_RESPONSE_TO_OXIDATIVE_STRESS	379	-0.0731463	-1.58197	0.0443548	0.284711	1	5497	tags=47%, list=40%, signal=76%
GO_NEGATIVE_REGULATION_OF_T_CELL_RECEPTOR_SIGNALING_PATHWAY	16	-0.323798	-1.58094	0.0499002	0.284984	1	5022	tags=69%, list=36%, signal=108%
GO_PROTEIN_TETRAMERIZATION	114	-0.123829	-1.57937	0.0547945	0.286124	1	4719	tags=46%, list=34%, signal=70%
GO_POSITIVE_REGULATION_OF_TELOMERE_CAPPING	17	-0.315945	-1.57886	0.0510204	0.285791	1	5384	tags=71%, list=39%, signal=116%
GO_ENDOSOME_TO_LYSOSOME_TRANSPORT	54	-0.181177	-1.57835	0.0574949	0.285517	1	10537	tags=94%, list=76%, signal=399%
GO_REGULATION_OF_CATION_TRANSMEMBRANE_TRANSPORT	280	-0.0818949	-1.57679	0.0496032	0.286606	1	2096	tags=23%, list=15%, signal=27%
GO_REGULATION_OF_AMINO_ACID_TRANSPORT	28	-0.260517	-1.57482	0.0376569	0.288129	1	3311	tags=50%, list=24%, signal=66%
GO_MULTICELLULAR_ORGANISMAL_SIGNALING	172	-0.103773	-1.57368	0.0444444	0.288706	1	2276	tags=27%, list=17%, signal=32%
GO_VACUOLAR_TRANSPORT	129	-0.120875	-1.57349	0.0575816	0.287966	1	10537	tags=88%, list=76%, signal=371%
GO_REGULATION_OF_SYSTEMIC_ARTERIAL_BLOOD_PRESSURE_BY_HORMONE	21	-0.289532	-1.57236	0.0443038	0.288521	1	3238	tags=52%, list=23%, signal=68%
GO_REGULATION_OF_LONG_TERM_SYNAPTIC_POTENTIATION	40	-0.212724	-1.57228	0.0438413	0.287618	1	2937	tags=43%, list=21%, signal=54%
GO_REGULATION_OF_CARBOHYDRATE_METABOLIC_PROCESS	164	-0.105088	-1.57123	0.0475248	0.288206	1	3194	tags=34%, list=23%, signal=43%
GO_POSITIVE_REGULATION_OF_ION_TRANSMEMBRANE_TRANSPORT	125	-0.12365	-1.5707	0.0456349	0.287955	1	2283	tags=29%, list=17%, signal=34%
GO_LACTATION	39	-0.209995	-1.57031	0.052	0.287477	1	2771	tags=41%, list=20%, signal=51%
GO_INTERLEUKIN_2_BIOSYNTHETIC_PROCESS	16	-0.325626	-1.57026	0.0417537	0.286571	1	2411	tags=50%, list=17%, signal=61%
GO_RESPONSE_TO_MURAMYL_DIPEPTIDE	18	-0.315545	-1.56363	0.0569745	0.294402	1	4849	tags=67%, list=35%, signal=103%
GO_POSITIVE_REGULATION_OF_INTERFERON_GAMMA_PRODUCTION	35	-0.227498	-1.56266	0.0668058	0.294707	1	3176	tags=46%, list=23%, signal=59%
GO_MULTICELLULAR_ORGANISM_AGING	28	-0.248461	-1.56259	0.0494845	0.293845	1	4462	tags=57%, list=32%, signal=84%
GO_ANTIBIOTIC_METABOLIC_PROCESS	51	-0.186921	-1.55724	0.0480769	0.300269	1	4193	tags=49%, list=30%, signal=70%
GO_CHONDROITIN_SULFATE_BIOSYNTHETIC_PROCESS	24	-0.264437	-1.55722	0.044586	0.299303	1	7853	tags=83%, list=57%, signal=193%
GO_OLIGOSACCHARIDE_METABOLIC_PROCESS	17	-0.318101	-1.55702	0.0517598	0.298594	1	7788	tags=88%, list=56%, signal=202%
GO_REGULATION_OF_PROTEIN_COMPLEX_DISASSEMBLY	97	-0.135542	-1.55592	0.0491159	0.299129	1	5538	tags=54%, list=40%, signal=89%
GO_RESPONSE_TO_INCREASED_OXYGEN_LEVELS	25	-0.259756	-1.55527	0.0534979	0.299031	1	7458	tags=80%, list=54%, signal=174%
GO_CARBOHYDRATE_CATABOLIC_PROCESS	154	-0.106679	-1.55334	0.0443548	0.300765	1	6785	tags=60%, list=49%, signal=116%
GO_LIPID_LOCALIZATION	279	-0.0809834	-1.55325	0.0483871	0.299941	1	6865	tags=58%, list=50%, signal=113%
GO_VACUOLE_ORGANIZATION	152	-0.108814	-1.5521	0.0565302	0.300465	1	4868	tags=46%, list=35%, signal=70%
GO_MECHANORECEPTOR_DIFFERENTIATION	46	-0.192467	-1.55056	0.0603113	0.301461	1	1253	tags=28%, list=9%, signal=31%
GO_POSITIVE_REGULATION_OF_CHEMOKINE_PRODUCTION	41	-0.208333	-1.55049	0.0572597	0.300597	1	3191	tags=44%, list=23%, signal=57%
GO_CELL_DIFFERENTIATION_IN_SPINAL_CORD	30	-0.242969	-1.54802	0.0590631	0.302951	1	3553	tags=50%, list=26%, signal=67%
GO_POLYSACCHARIDE_CATABOLIC_PROCESS	22	-0.27626	-1.54713	0.0541667	0.3033	1	6227	tags=73%, list=45%, signal=132%
GO_DRUG_CATABOLIC_PROCESS	61	-0.17053	-1.5471	0.0480167	0.302378	1	4216	tags=48%, list=31%, signal=68%
GO_ACTIVATION_OF_PROTEIN_KINASE_B_ACTIVITY	29	-0.237814	-1.54344	0.0650096	0.306653	1	8617	tags=86%, list=62%, signal=229%
GO_NEGATIVE_REGULATION_OF_CARBOHYDRATE_METABOLIC_PROCESS	33	-0.229229	-1.54309	0.0429448	0.306195	1	2698	tags=42%, list=20%, signal=53%
GO_RESPONSE_TO_OSMOTIC_STRESS	69	-0.157858	-1.5429	0.0603622	0.305499	1	6829	tags=65%, list=50%, signal=129%
GO_ENDOSOME_TRANSPORT_VIA_MULTIVESICULAR_BODY_SORTING_PATHWAY	24	-0.258544	-1.54144	0.0654008	0.306652	1	9658	tags=96%, list=70%, signal=319%
GO_REGULATION_OF_THE_FORCE_OF_HEART_CONTRACTION	24	-0.258607	-1.54103	0.047817	0.306349	1	6784	tags=75%, list=49%, signal=147%
GO_RESPONSE_TO_EPIDERMAL_GROWTH_FACTOR	44	-0.198648	-1.5409	0.0504032	0.30554	1	7300	tags=73%, list=53%, signal=154%
GO_ADAPTIVE_THERMOGENESIS	131	-0.11519	-1.54007	0.0452756	0.30577	1	4744	tags=46%, list=34%, signal=69%
GO_ACTIVATION_OF_JUN_KINASE_ACTIVITY	34	-0.225008	-1.53935	0.0645833	0.305747	1	7046	tags=74%, list=51%, signal=150%
GO_BODY_FLUID_SECRETION	70	-0.154682	-1.53847	0.0554455	0.305975	1	3198	tags=39%, list=23%, signal=50%
GO_PROTEIN_COMPLEX_OLIGOMERIZATION	435	-0.0654481	-1.53846	0.0596708	0.305043	1	6704	tags=55%, list=49%, signal=104%
GO_MAINTENANCE_OF_PROTEIN_LOCATION	95	-0.1325	-1.53773	0.0492424	0.305082	1	3122	tags=36%, list=23%, signal=46%
GO_NEUTRAL_LIPID_CATABOLIC_PROCESS	23	-0.26908	-1.53697	0.0559006	0.305173	1	2892	tags=48%, list=21%, signal=60%
GO_POSITIVE_REGULATION_OF_MITOCHONDRIAL_TRANSLATION	17	-0.307613	-1.53688	0.0705394	0.304362	1	6310	tags=76%, list=46%, signal=141%
GO_GLYCOSYL_COMPOUND_BIOSYNTHETIC_PROCESS	36	-0.215019	-1.53598	0.0631365	0.304664	1	4322	tags=53%, list=31%, signal=77%
GO_RESPONSE_TO_ACIDIC_PH	15	-0.324419	-1.5348	0.0670611	0.305459	1	2887	tags=53%, list=21%, signal=67%
GO_ACETYL_COA_BIOSYNTHETIC_PROCESS	20	-0.284812	-1.53383	0.059761	0.305898	1	5043	tags=65%, list=37%, signal=102%
GO_REGULATION_OF_PLATELET_DERIVED_GROWTH_FACTOR_RECEPTOR_SIGNALING_PATHWAY	20	-0.283295	-1.53345	0.0554415	0.305537	1	6443	tags=75%, list=47%, signal=141%
GO_CARDIAC_VENTRICLE_MORPHOGENESIS	54	-0.176599	-1.53193	0.06	0.30687	1	3449	tags=43%, list=25%, signal=57%
GO_LONG_CHAIN_FATTY_ACID_TRANSPORT	50	-0.181974	-1.53173	0.0695296	0.306278	1	4396	tags=50%, list=32%, signal=73%
GO_OSTEOBLAST_PROLIFERATION	20	-0.286798	-1.52952	0.0583333	0.308508	1	2947	tags=50%, list=21%, signal=63%
GO_NEGATIVE_REGULATION_OF_BLOOD_CIRCULATION	29	-0.237556	-1.52853	0.0619835	0.308949	1	8145	tags=83%, list=59%, signal=202%
GO_ADULT_LOCOMOTORY_BEHAVIOR	62	-0.160474	-1.52801	0.0681363	0.308691	1	2469	tags=34%, list=18%, signal=41%
GO_STEROID_METABOLIC_PROCESS	202	-0.0925589	-1.52774	0.0722892	0.308135	1	4205	tags=40%, list=30%, signal=56%
GO_PHOSPHATIDYLINOSITOL_BIOSYNTHETIC_PROCESS	110	-0.12354	-1.52743	0.0554455	0.307663	1	10472	tags=88%, list=76%, signal=363%
GO_SECONDARY_ALCOHOL_METABOLIC_PROCESS	63	-0.161439	-1.52454	0.0552147	0.310744	1	4133	tags=46%, list=30%, signal=65%
GO_CELLULAR_DETOXIFICATION	76	-0.149775	-1.52321	0.0953347	0.311814	1	8653	tags=78%, list=63%, signal=207%
GO_RESPONSE_TO_ZINC_ION	34	-0.219433	-1.51909	0.06917	0.316516	1	4689	tags=56%, list=34%, signal=84%
GO_NEUROMUSCULAR_PROCESS_CONTROLLING_BALANCE	43	-0.193897	-1.5181	0.063655	0.317072	1	3429	tags=44%, list=25%, signal=59%
GO_ALCOHOL_CATABOLIC_PROCESS	39	-0.201548	-1.51621	0.07173	0.318883	1	3948	tags=49%, list=29%, signal=68%
GO_MONOCARBOXYLIC_ACID_BIOSYNTHETIC_PROCESS	137	-0.110112	-1.5103	0.0730223	0.326404	1	6752	tags=60%, list=49%, signal=116%
GO_LYSOSOMAL_TRANSPORT	98	-0.130041	-1.51006	0.0679612	0.32588	1	11167	tags=94%, list=81%, signal=490%
GO_MATURE_B_CELL_DIFFERENTIATION_INVOLVED_IN_IMMUNE_RESPONSE	15	-0.325973	-1.50968	0.0781563	0.325432	1	3785	tags=60%, list=27%, signal=83%
GO_PLATELET_DERIVED_GROWTH_FACTOR_RECEPTOR_SIGNALING_PATHWAY	52	-0.179078	-1.50859	0.06	0.326088	1	5497	tags=58%, list=40%, signal=96%
GO_GLYCEROPHOSPHOLIPID_CATABOLIC_PROCESS	19	-0.290051	-1.50812	0.0887574	0.325832	1	2539	tags=47%, list=18%, signal=58%
GO_GROWTH_PLATE_CARTILAGE_MORPHOGENESIS	15	-0.33207	-1.50377	0.0681363	0.331194	1	3701	tags=60%, list=27%, signal=82%
GO_HEME_BIOSYNTHETIC_PROCESS	21	-0.268783	-1.50251	0.0623782	0.332089	1	7464	tags=81%, list=54%, signal=176%
GO_REGULATION_OF_METAL_ION_TRANSPORT	305	-0.0726009	-1.50181	0.0714286	0.332111	1	2594	tags=26%, list=19%, signal=31%
GO_MAST_CELL_ACTIVATION	43	-0.197072	-1.5006	0.0813492	0.33295	1	7234	tags=72%, list=52%, signal=151%
GO_NUCLEOSIDE_TRIPHOSPHATE_BIOSYNTHETIC_PROCESS	66	-0.155383	-1.50049	0.0628803	0.332189	1	4137	tags=45%, list=30%, signal=65%
GO_REGULATION_OF_MUSCLE_ADAPTATION	72	-0.153024	-1.49984	0.0697674	0.332118	1	4031	tags=44%, list=29%, signal=62%
GO_PLASMA_LIPOPROTEIN_PARTICLE_CLEARANCE	38	-0.205109	-1.49779	0.07173	0.334083	1	6979	tags=71%, list=51%, signal=143%
GO_RESPONSE_TO_CALCIUM_ION	135	-0.110603	-1.49487	0.0728051	0.337358	1	4007	tags=40%, list=29%, signal=56%
GO_PHOSPHOLIPID_CATABOLIC_PROCESS	30	-0.226415	-1.4945	0.0689655	0.336972	1	1942	tags=37%, list=14%, signal=43%
GO_SCHWANN_CELL_DEVELOPMENT	29	-0.231818	-1.49377	0.0585859	0.337078	1	3944	tags=52%, list=29%, signal=72%
GO_RESPONSE_TO_VITAMIN	68	-0.15171	-1.49262	0.0464646	0.337869	1	9682	tags=85%, list=70%, signal=285%
GO_REGULATION_OF_BLOOD_CIRCULATION	239	-0.0841034	-1.49131	0.0701403	0.338895	1	2208	tags=24%, list=16%, signal=28%
GO_CELLULAR_HORMONE_METABOLIC_PROCESS	57	-0.163969	-1.49109	0.0735849	0.338302	1	2588	tags=35%, list=19%, signal=43%
GO_MAINTENANCE_OF_PROTEIN_LOCALIZATION_IN_ORGANELLE	36	-0.207876	-1.48652	0.0761317	0.344176	1	3271	tags=44%, list=24%, signal=58%
GO_RESPONSE_TO_HYPEROXIA	18	-0.293001	-1.48607	0.0648536	0.343967	1	7458	tags=83%, list=54%, signal=181%
GO_CYTOKINE_SECRETION	136	-0.109557	-1.48254	0.0919765	0.348482	1	3271	tags=35%, list=24%, signal=45%
GO_REGULATION_OF_SUPEROXIDE_ANION_GENERATION	16	-0.309428	-1.4816	0.0728347	0.34888	1	4358	tags=63%, list=32%, signal=91%
GO_NEGATIVE_REGULATION_OF_PEPTIDE_HORMONE_SECRETION	37	-0.206375	-1.47969	0.0865385	0.350791	1	2008	tags=35%, list=15%, signal=41%
GO_MITOCHONDRIAL_GENE_EXPRESSION	157	-0.101988	-1.47956	0.0549242	0.350051	1	10469	tags=86%, list=76%, signal=353%
GO_NEGATIVE_REGULATION_OF_GTPASE_ACTIVITY	42	-0.191739	-1.47922	0.0662526	0.349597	1	9514	tags=88%, list=69%, signal=283%
GO_NEGATIVE_REGULATION_OF_CYTOKINE_SECRETION	37	-0.201274	-1.47662	0.0667939	0.352666	1	5060	tags=57%, list=37%, signal=89%
GO_REACTIVE_OXYGEN_SPECIES_METABOLIC_PROCESS	125	-0.113879	-1.47605	0.0747475	0.352625	1	6609	tags=59%, list=48%, signal=113%
GO_REGULATION_OF_PH	77	-0.144548	-1.47581	0.0730223	0.352048	1	8944	tags=79%, list=65%, signal=224%
GO_CELLULAR_METABOLIC_COMPOUND_SALVAGE	29	-0.230435	-1.47189	0.0881226	0.357267	1	8243	tags=83%, list=60%, signal=205%
GO_TETRAPYRROLE_BIOSYNTHETIC_PROCESS	27	-0.237092	-1.47151	0.0909091	0.356878	1	7464	tags=78%, list=54%, signal=169%
GO_SYNAPTIC_VESICLE_PRIMING	17	-0.29823	-1.47044	0.0790514	0.357561	1	5628	tags=71%, list=41%, signal=119%
GO_POSITIVE_REGULATION_OF_TISSUE_REMODELING	22	-0.260126	-1.46972	0.0843621	0.357711	1	7076	tags=77%, list=51%, signal=158%
GO_NEGATIVE_REGULATION_OF_STRIATED_MUSCLE_CELL_DIFFERENTIATION	26	-0.239775	-1.46938	0.0806452	0.357249	1	3596	tags=50%, list=26%, signal=68%
GO_VITAMIN_METABOLIC_PROCESS	93	-0.125132	-1.46887	0.0802603	0.357166	1	9557	tags=82%, list=69%, signal=264%
GO_STARTLE_RESPONSE	23	-0.251329	-1.46833	0.0774059	0.356988	1	3736	tags=52%, list=27%, signal=71%
GO_PROTEIN_PALMITOYLATION	31	-0.220696	-1.46628	0.0825516	0.359201	1	8086	tags=81%, list=59%, signal=195%
GO_REGULATION_OF_STRIATED_MUSCLE_CELL_DIFFERENTIATION	73	-0.144387	-1.46577	0.0844794	0.359101	1	3310	tags=38%, list=24%, signal=50%
GO_ORGANIC_HYDROXY_COMPOUND_CATABOLIC_PROCESS	50	-0.174431	-1.46536	0.0867052	0.358847	1	3948	tags=46%, list=29%, signal=64%
GO_TRNA_MODIFICATION	80	-0.141098	-1.4646	0.11245	0.359109	1	6341	tags=60%, list=46%, signal=110%
GO_INOSITOL_LIPID_MEDIATED_SIGNALING	151	-0.105098	-1.46455	0.0794574	0.358252	1	3956	tags=39%, list=29%, signal=54%
GO_INTERFERON_GAMMA_PRODUCTION	55	-0.167108	-1.46139	0.0779727	0.362128	1	3222	tags=40%, list=23%, signal=52%
GO_PREASSEMBLY_OF_GPI_ANCHOR_IN_ER_MEMBRANE	17	-0.293562	-1.46053	0.0807087	0.362441	1	8126	tags=88%, list=59%, signal=215%
GO_NEUTRAL_AMINO_ACID_TRANSPORT	31	-0.220745	-1.46029	0.0792683	0.361926	1	2302	tags=39%, list=17%, signal=46%
GO_CARDIAC_MUSCLE_CELL_ACTION_POTENTIAL	62	-0.156769	-1.45484	0.0886598	0.369349	1	2075	tags=31%, list=15%, signal=36%
GO_RESPONSE_TO_PLATELET_DERIVED_GROWTH_FACTOR	19	-0.274588	-1.45341	0.0928854	0.370658	1	7107	tags=79%, list=52%, signal=163%
GO_ACTIN_MEDIATED_CELL_CONTRACTION	98	-0.124484	-1.45327	0.08125	0.369906	1	2096	tags=28%, list=15%, signal=32%
GO_POSITIVE_REGULATION_OF_STEROID_METABOLIC_PROCESS	15	-0.314489	-1.4528	0.0737705	0.369576	1	5782	tags=73%, list=42%, signal=126%
GO_ENDOSOMAL_TRANSPORT	198	-0.0890075	-1.45203	0.0615079	0.369863	1	11607	tags=93%, list=84%, signal=578%
GO_MALE_MEIOSIS_I	18	-0.282824	-1.44767	0.093254	0.375775	1	6832	tags=78%, list=50%, signal=154%
GO_HETEROTYPIC_CELL_CELL_ADHESION	40	-0.192537	-1.44686	0.0776515	0.376045	1	8731	tags=83%, list=63%, signal=224%
GO_REGULATION_OF_MAST_CELL_ACTIVATION	28	-0.225986	-1.44291	0.0925926	0.381288	1	7234	tags=75%, list=52%, signal=157%
GO_INSULIN_RECEPTOR_SIGNALING_PATHWAY	120	-0.111786	-1.44243	0.0833333	0.381005	1	7322	tags=64%, list=53%, signal=136%
GO_HUMORAL_IMMUNE_RESPONSE_MEDIATED_BY_CIRCULATING_IMMUNOGLOBULIN	25	-0.244056	-1.43914	0.10119	0.385408	1	3261	tags=48%, list=24%, signal=63%
GO_POSITIVE_REGULATION_OF_GLUCOSE_METABOLIC_PROCESS	21	-0.264332	-1.43841	0.0858896	0.385698	1	3585	tags=52%, list=26%, signal=71%
GO_PHOSPHOLIPID_BIOSYNTHETIC_PROCESS	213	-0.0843193	-1.43831	0.0869565	0.384911	1	10122	tags=82%, list=73%, signal=302%
GO_MUSCLE_HYPERTROPHY_IN_RESPONSE_TO_STRESS	20	-0.266538	-1.43644	0.104	0.387035	1	3226	tags=50%, list=23%, signal=65%
GO_RESPONSE_TO_FATTY_ACID	66	-0.152267	-1.43589	0.0928433	0.387049	1	3135	tags=38%, list=23%, signal=49%
GO_MUSCLE_HYPERTROPHY	73	-0.141447	-1.4342	0.0806452	0.388889	1	4106	tags=44%, list=30%, signal=62%
GO_ACETYL_COA_BIOSYNTHETIC_PROCESS_FROM_PYRUVATE	15	-0.301394	-1.43419	0.0803213	0.387928	1	5043	tags=67%, list=37%, signal=105%
GO_CELLULAR_RESPONSE_TO_CORTICOSTEROID_STIMULUS	56	-0.163836	-1.4337	0.0987903	0.387804	1	1691	tags=29%, list=12%, signal=32%
GO_ERBB2_SIGNALING_PATHWAY	29	-0.230638	-1.43333	0.1139	0.387464	1	6338	tags=69%, list=46%, signal=127%
GO_MEMBRANE_DEPOLARIZATION_DURING_ACTION_POTENTIAL	33	-0.21376	-1.43325	0.0958084	0.38664	1	2075	tags=36%, list=15%, signal=43%
GO_NONRIBOSOMAL_PEPTIDE_BIOSYNTHETIC_PROCESS	16	-0.299111	-1.43283	0.0961145	0.386311	1	6224	tags=75%, list=45%, signal=137%
GO_CARDIAC_CONDUCTION	128	-0.106582	-1.4315	0.097166	0.387511	1	2208	tags=27%, list=16%, signal=31%
GO_POSITIVE_REGULATION_OF_LIPID_TRANSPORT	43	-0.184675	-1.43104	0.104743	0.38724	1	6763	tags=67%, list=49%, signal=132%
GO_SYNAPTIC_TRANSMISSION_GABAERGIC	41	-0.189288	-1.43078	0.0809793	0.38675	1	8162	tags=78%, list=59%, signal=191%
GO_LATE_ENDOSOME_TO_VACUOLE_TRANSPORT	16	-0.300109	-1.43069	0.095723	0.385979	1	9658	tags=100%, list=70%, signal=333%
GO_MUSCLE_CONTRACTION	277	-0.0747803	-1.4298	0.091954	0.386505	1	2127	tags=23%, list=15%, signal=26%
GO_PROTEIN_PROCESSING	157	-0.0994297	-1.42953	0.100402	0.385899	1	6024	tags=54%, list=44%, signal=94%
GO_RETROGRADE_TRANSPORT_ENDOSOME_TO_GOLGI	72	-0.145306	-1.4294	0.0818965	0.385145	1	11607	tags=99%, list=84%, signal=619%
GO_NEGATIVE_REGULATION_OF_CYTOKINE_BIOSYNTHETIC_PROCESS	21	-0.260006	-1.4289	0.10119	0.384975	1	4958	tags=62%, list=36%, signal=97%
GO_REGULATION_OF_NATURAL_KILLER_CELL_ACTIVATION	24	-0.239713	-1.42866	0.0833333	0.384453	1	8768	tags=88%, list=64%, signal=240%
GO_REGULATION_OF_LIPID_METABOLIC_PROCESS	309	-0.0712349	-1.42451	0.103792	0.390441	1	6494	tags=54%, list=47%, signal=100%
GO_CEREBELLAR_CORTEX_FORMATION	19	-0.274588	-1.42369	0.0995935	0.390885	1	7107	tags=79%, list=52%, signal=163%
GO_AUTOPHAGY_OF_MITOCHONDRION	68	-0.147168	-1.42174	0.104255	0.39308	1	6905	tags=65%, list=50%, signal=129%
GO_POSITIVE_REGULATION_OF_SODIUM_ION_TRANSMEMBRANE_TRANSPORT	20	-0.262439	-1.41947	0.0992218	0.395992	1	3972	tags=55%, list=29%, signal=77%
GO_LIPID_HOMEOSTASIS	88	-0.129496	-1.41908	0.114165	0.3957	1	2928	tags=34%, list=21%, signal=43%
GO_CELLULAR_RESPONSE_TO_TOXIC_SUBSTANCE	188	-0.0903482	-1.41185	0.10559	0.406733	1	5154	tags=46%, list=37%, signal=73%
GO_INTERLEUKIN_2_PRODUCTION	49	-0.174451	-1.41136	0.109344	0.406607	1	9706	tags=88%, list=70%, signal=295%
GO_POSITIVE_REGULATION_OF_LONG_TERM_SYNAPTIC_POTENTIATION	21	-0.257931	-1.40972	0.106589	0.408488	1	6300	tags=71%, list=46%, signal=131%
GO_INNER_EAR_RECEPTOR_CELL_STEREOCILIUM_ORGANIZATION	24	-0.242972	-1.40849	0.116858	0.409682	1	1253	tags=33%, list=9%, signal=37%
GO_NEGATIVE_REGULATION_OF_ANTIGEN_RECEPTOR_MEDIATED_SIGNALING_PATHWAY	21	-0.255358	-1.40747	0.0984252	0.410526	1	5022	tags=62%, list=36%, signal=97%
GO_CHONDROCYTE_DIFFERENTIATION_INVOLVED_IN_ENDOCHONDRAL_BONE_MORPHOGENESIS	25	-0.234502	-1.40633	0.117308	0.411578	1	7254	tags=76%, list=53%, signal=160%
GO_GPI_ANCHOR_BIOSYNTHETIC_PROCESS	31	-0.217789	-1.4047	0.110672	0.413393	1	8126	tags=81%, list=59%, signal=196%
GO_POSITIVE_REGULATION_OF_SYNAPTIC_TRANSMISSION	154	-0.098703	-1.40314	0.111111	0.41514	1	3849	tags=38%, list=28%, signal=52%
GO_LYTIC_VACUOLE_ORGANIZATION	59	-0.156232	-1.40298	0.118547	0.414432	1	4868	tags=51%, list=35%, signal=78%
GO_MULTI_MULTICELLULAR_ORGANISM_PROCESS	156	-0.0966193	-1.40207	0.0958904	0.415101	1	3369	tags=34%, list=24%, signal=44%
GO_REGULATION_OF_AUTOPHAGY_OF_MITOCHONDRION	38	-0.194348	-1.4015	0.121649	0.415102	1	7127	tags=71%, list=52%, signal=147%
GO_ASTROCYTE_ACTIVATION	16	-0.289823	-1.40062	0.103239	0.41566	1	5490	tags=69%, list=40%, signal=114%
GO_REGULATION_OF_OXIDOREDUCTASE_ACTIVITY	70	-0.139753	-1.39946	0.121622	0.416511	1	5767	tags=56%, list=42%, signal=95%
GO_RESPONSE_TO_MUSCLE_ACTIVITY	20	-0.255911	-1.3966	0.121951	0.420499	1	5441	tags=65%, list=39%, signal=107%
GO_SYNAPTIC_VESICLE_LOCALIZATION	155	-0.0970495	-1.39558	0.0843137	0.421309	1	7753	tags=66%, list=56%, signal=149%
GO_CYTOSOLIC_TRANSPORT	138	-0.0995768	-1.39556	0.102041	0.42039	1	11633	tags=94%, list=84%, signal=596%
GO_CEREBELLAR_CORTEX_DEVELOPMENT	46	-0.178519	-1.39403	0.118503	0.421958	1	7141	tags=70%, list=52%, signal=144%
GO_VESICLE_DOCKING_INVOLVED_IN_EXOCYTOSIS	44	-0.178879	-1.39252	0.113725	0.423549	1	1930	tags=32%, list=14%, signal=37%
GO_POSITIVE_REGULATION_OF_CATION_CHANNEL_ACTIVITY	56	-0.158734	-1.39144	0.122807	0.424467	1	776	tags=21%, list=6%, signal=23%
GO_REGULATION_OF_T_HELPER_1_TYPE_IMMUNE_RESPONSE	18	-0.276156	-1.39115	0.103647	0.423975	1	3093	tags=50%, list=22%, signal=64%
GO_TRIGLYCERIDE_METABOLIC_PROCESS	24	-0.235772	-1.39036	0.1	0.424316	1	7673	tags=79%, list=56%, signal=178%
GO_POSITIVE_REGULATION_OF_EMBRYONIC_DEVELOPMENT	28	-0.219112	-1.39012	0.107438	0.423778	1	5851	tags=64%, list=42%, signal=111%
GO_ATP_METABOLIC_PROCESS	41	-0.180917	-1.39011	0.112205	0.422832	1	7268	tags=71%, list=53%, signal=149%
GO_REGULATION_OF_CALCIUM_ION_TRANSMEMBRANE_TRANSPORTER_ACTIVITY	73	-0.136623	-1.38985	0.102941	0.422382	1	2283	tags=30%, list=17%, signal=36%
GO_MITOCHONDRION_ORGANIZATION	476	-0.056631	-1.38896	0.101167	0.422935	1	8750	tags=69%, list=63%, signal=182%
GO_POSITIVE_REGULATION_OF_AMINO_ACID_TRANSPORT	15	-0.293641	-1.38864	0.104294	0.42254	1	3311	tags=53%, list=24%, signal=70%
GO_NEGATIVE_REGULATION_OF_SECRETION	162	-0.093772	-1.386	0.121514	0.426103	1	1362	tags=19%, list=10%, signal=21%
GO_PHOSPHATE_ION_TRANSPORT	20	-0.25399	-1.38181	0.111554	0.43243	1	6157	tags=70%, list=45%, signal=126%
GO_EAR_DEVELOPMENT	171	-0.0897622	-1.38106	0.111111	0.432849	1	2327	tags=26%, list=17%, signal=31%
GO_PROTEIN_LOCALIZATION_TO_ENDOPLASMIC_RETICULUM	131	-0.105788	-1.38054	0.11753	0.432894	1	6241	tags=56%, list=45%, signal=101%
GO_CRISTAE_FORMATION	30	-0.213771	-1.38048	0.12037	0.432032	1	6713	tags=70%, list=49%, signal=136%
GO_RESPONSE_TO_NUTRIENT	167	-0.0927524	-1.38029	0.105159	0.431416	1	4518	tags=42%, list=33%, signal=62%
GO_PHOSPHOLIPID_DEPHOSPHORYLATION	35	-0.199184	-1.37981	0.117308	0.431333	1	10658	tags=97%, list=77%, signal=427%
GO_MAST_CELL_MEDIATED_IMMUNITY	36	-0.198267	-1.37953	0.123482	0.43087	1	7234	tags=72%, list=52%, signal=152%
GO_WATER_SOLUBLE_VITAMIN_METABOLIC_PROCESS	64	-0.153213	-1.3794	0.126556	0.430121	1	9534	tags=84%, list=69%, signal=272%
GO_REGULATION_OF_LIPID_KINASE_ACTIVITY	57	-0.15548	-1.37915	0.110891	0.42961	1	5366	tags=54%, list=39%, signal=89%
GO_QUINONE_BIOSYNTHETIC_PROCESS	16	-0.275522	-1.37564	0.113095	0.434834	1	5687	tags=69%, list=41%, signal=117%
GO_ORGANELLE_FUSION	108	-0.113442	-1.37399	0.10352	0.436707	1	7132	tags=63%, list=52%, signal=129%
GO_SERINE_FAMILY_AMINO_ACID_METABOLIC_PROCESS	30	-0.211961	-1.37389	0.109589	0.435952	1	8117	tags=80%, list=59%, signal=194%
GO_COMPLEMENT_ACTIVATION	34	-0.19549	-1.37384	0.114286	0.435063	1	5424	tags=59%, list=39%, signal=97%
GO_REGULATION_OF_EXECUTION_PHASE_OF_APOPTOSIS	23	-0.23884	-1.37238	0.119433	0.436771	1	6906	tags=74%, list=50%, signal=148%
GO_REGULATION_OF_KERATINOCYTE_DIFFERENTIATION	25	-0.229351	-1.37211	0.119048	0.436282	1	5670	tags=64%, list=41%, signal=108%
GO_REGULATION_OF_REACTIVE_OXYGEN_SPECIES_METABOLIC_PROCESS	80	-0.134125	-1.37061	0.111328	0.437989	1	6609	tags=61%, list=48%, signal=117%
GO_HOMOLOGOUS_RECOMBINATION	39	-0.185629	-1.36887	0.126953	0.440248	1	10532	tags=95%, list=76%, signal=400%
GO_REGULATION_OF_TRANSLATIONAL_FIDELITY	18	-0.267855	-1.36844	0.10251	0.43999	1	6272	tags=72%, list=45%, signal=132%
GO_AXONEMAL_DYNEIN_COMPLEX_ASSEMBLY	26	-0.224091	-1.36726	0.126016	0.441168	1	6464	tags=69%, list=47%, signal=130%
GO_REGULATION_OF_MUSCLE_SYSTEM_PROCESS	185	-0.0873303	-1.36604	0.123506	0.44228	1	4031	tags=38%, list=29%, signal=53%
GO_SECONDARY_METABOLITE_BIOSYNTHETIC_PROCESS	20	-0.252465	-1.36443	0.128514	0.444127	1	6178	tags=70%, list=45%, signal=127%
GO_TRNA_PROCESSING	121	-0.10356	-1.36271	0.130604	0.446312	1	9299	tags=78%, list=67%, signal=236%
GO_NEGATIVE_REGULATION_OF_INNATE_IMMUNE_RESPONSE	36	-0.18904	-1.36177	0.130693	0.447032	1	3147	tags=42%, list=23%, signal=54%
GO_NEGATIVE_REGULATION_OF_LIPID_CATABOLIC_PROCESS	15	-0.295296	-1.36076	0.151456	0.44799	1	5127	tags=67%, list=37%, signal=106%
GO_ENDOCRINE_PROCESS	53	-0.157764	-1.35979	0.119675	0.448891	1	3298	tags=40%, list=24%, signal=52%
GO_PLATELET_DEGRANULATION	101	-0.114088	-1.35848	0.130612	0.450053	1	4174	tags=42%, list=30%, signal=59%
GO_REGULATION_OF_SUPEROXIDE_METABOLIC_PROCESS	24	-0.23007	-1.35804	0.129094	0.449852	1	5453	tags=63%, list=40%, signal=103%
GO_REGULATION_OF_PHOSPHOLIPID_METABOLIC_PROCESS	59	-0.15401	-1.35768	0.13253	0.449529	1	5366	tags=54%, list=39%, signal=88%
GO_REGULATION_OF_RESPONSE_TO_REACTIVE_OXYGEN_SPECIES	30	-0.205116	-1.35417	0.131783	0.454882	1	5453	tags=60%, list=40%, signal=99%
GO_SYNAPTIC_TRANSMISSION_CHOLINERGIC	21	-0.245669	-1.35354	0.124756	0.455077	1	3842	tags=52%, list=28%, signal=72%
GO_HUMORAL_IMMUNE_RESPONSE	84	-0.121145	-1.3519	0.144033	0.457095	1	3430	tags=37%, list=25%, signal=49%
GO_REGULATION_OF_RENAL_SYSTEM_PROCESS	23	-0.238647	-1.35151	0.137712	0.456856	1	3311	tags=48%, list=24%, signal=63%
GO_MEMBRANE_INVAGINATION	57	-0.15356	-1.3511	0.128099	0.456646	1	2489	tags=33%, list=18%, signal=41%
GO_SIGNAL_RELEASE_FROM_SYNAPSE	157	-0.0931705	-1.34772	0.131115	0.461862	1	4089	tags=39%, list=30%, signal=55%
GO_MEIOTIC_CELL_CYCLE_PROCESS	132	-0.100989	-1.34758	0.132265	0.461135	1	10532	tags=86%, list=76%, signal=362%
GO_REGULATION_OF_EPIDERMAL_CELL_DIFFERENTIATION	41	-0.175748	-1.34343	0.118012	0.467766	1	10030	tags=90%, list=73%, signal=330%
GO_ENDOCYTIC_RECYCLING	40	-0.176865	-1.34145	0.126068	0.470453	1	2051	tags=33%, list=15%, signal=38%
GO_LONG_TERM_SYNAPTIC_POTENTIATION	81	-0.131621	-1.34039	0.139344	0.471402	1	3134	tags=36%, list=23%, signal=46%
GO_RESPONSE_TO_MAGNESIUM_ION	15	-0.289082	-1.3395	0.145791	0.472067	1	1535	tags=40%, list=11%, signal=45%
GO_REGULATION_OF_MEMBRANE_PROTEIN_ECTODOMAIN_PROTEOLYSIS	18	-0.26178	-1.33783	0.144531	0.474156	1	3291	tags=50%, list=24%, signal=66%
GO_ACTIN_FILAMENT_DEPOLYMERIZATION	46	-0.167618	-1.33767	0.145161	0.473512	1	5492	tags=57%, list=40%, signal=94%
GO_RESPONSE_TO_PEPTIDE	414	-0.0580295	-1.33751	0.142308	0.472861	1	3422	tags=30%, list=25%, signal=39%
GO_ASPARTATE_FAMILY_AMINO_ACID_METABOLIC_PROCESS	42	-0.173898	-1.33506	0.142285	0.476597	1	5819	tags=60%, list=42%, signal=103%
GO_FOAM_CELL_DIFFERENTIATION	24	-0.225866	-1.33364	0.151452	0.47829	1	3787	tags=50%, list=27%, signal=69%
GO_CELLULAR_COMPONENT_ASSEMBLY_INVOLVED_IN_MORPHOGENESIS	84	-0.122919	-1.33168	0.13035	0.480915	1	5540	tags=52%, list=40%, signal=87%
GO_CELLULAR_MODIFIED_AMINO_ACID_CATABOLIC_PROCESS	21	-0.238085	-1.33103	0.131048	0.481191	1	2633	tags=43%, list=19%, signal=53%
GO_POSITIVE_REGULATION_OF_INTERLEUKIN_2_PRODUCTION	26	-0.219771	-1.32999	0.140873	0.482206	1	9706	tags=92%, list=70%, signal=311%
GO_CELLULAR_AMINO_ACID_CATABOLIC_PROCESS	65	-0.140287	-1.32733	0.149606	0.486334	1	5077	tags=51%, list=37%, signal=80%
GO_COTRANSLATIONAL_PROTEIN_TARGETING_TO_MEMBRANE	96	-0.114985	-1.32564	0.141176	0.488563	1	6902	tags=61%, list=50%, signal=122%
GO_GLUCAN_CATABOLIC_PROCESS	20	-0.248907	-1.32549	0.149312	0.487885	1	6227	tags=70%, list=45%, signal=127%
GO_PROCESS_UTILIZING_AUTOPHAGIC_MECHANISM	443	-0.054898	-1.32429	0.129363	0.489137	1	7300	tags=58%, list=53%, signal=120%
GO_CELLULAR_GLUCOSE_HOMEOSTASIS	126	-0.100115	-1.32414	0.153082	0.488428	1	4215	tags=40%, list=31%, signal=58%
GO_NEGATIVE_REGULATION_OF_ORGANELLE_ASSEMBLY	32	-0.193053	-1.32411	0.148438	0.487518	1	8119	tags=78%, list=59%, signal=190%
GO_CARDIAC_MUSCLE_CELL_CONTRACTION	61	-0.143807	-1.32105	0.138889	0.492356	1	2096	tags=30%, list=15%, signal=35%
GO_NEGATIVE_REGULATION_OF_SMALL_MOLECULE_METABOLIC_PROCESS	53	-0.152401	-1.31973	0.136842	0.493821	1	7535	tags=70%, list=55%, signal=153%
GO_POSITIVE_REGULATION_OF_GLIAL_CELL_DIFFERENTIATION	37	-0.177894	-1.31709	0.153846	0.497853	1	2027	tags=32%, list=15%, signal=38%
GO_TRIGLYCERIDE_CATABOLIC_PROCESS	17	-0.261281	-1.31669	0.144509	0.497638	1	2892	tags=47%, list=21%, signal=59%
GO_ANTIMICROBIAL_HUMORAL_RESPONSE	24	-0.219674	-1.31637	0.15098	0.497236	1	2723	tags=42%, list=20%, signal=52%
GO_MELANIN_BIOSYNTHETIC_PROCESS	15	-0.285743	-1.31537	0.148225	0.498189	1	6178	tags=73%, list=45%, signal=133%
GO_INCLUSION_BODY_ASSEMBLY	20	-0.245218	-1.31517	0.161479	0.497581	1	9036	tags=90%, list=66%, signal=261%
GO_INNER_MITOCHONDRIAL_MEMBRANE_ORGANIZATION	43	-0.164983	-1.31441	0.151329	0.498093	1	6713	tags=65%, list=49%, signal=126%
GO_POSITIVE_REGULATION_OF_CYTOKINE_SECRETION	80	-0.12612	-1.31378	0.152475	0.498342	1	3271	tags=36%, list=24%, signal=47%
GO_LIPID_STORAGE	52	-0.155195	-1.31339	0.156746	0.498167	1	3173	tags=38%, list=23%, signal=50%
GO_REGULATION_OF_SODIUM_ION_TRANSMEMBRANE_TRANSPORTER_ACTIVITY	47	-0.1641	-1.3129	0.148893	0.49813	1	2147	tags=32%, list=16%, signal=38%
GO_NUCLEOTIDE_EXCISION_REPAIR_DNA_DAMAGE_RECOGNITION	23	-0.224591	-1.3094	0.156126	0.503707	1	8901	tags=87%, list=65%, signal=245%
GO_B_CELL_MEDIATED_IMMUNITY	69	-0.133584	-1.30911	0.174538	0.503304	1	5763	tags=55%, list=42%, signal=94%
GO_INSULIN_SECRETION	169	-0.087836	-1.30853	0.157371	0.503515	1	1171	tags=17%, list=8%, signal=19%
GO_REGULATION_OF_SODIUM_ION_TRANSPORT	77	-0.127555	-1.30767	0.136646	0.504056	1	2192	tags=29%, list=16%, signal=34%
GO_MATURE_B_CELL_DIFFERENTIATION	19	-0.250974	-1.30761	0.147253	0.503194	1	3803	tags=53%, list=28%, signal=73%
GO_RETINA_HOMEOSTASIS	43	-0.170985	-1.30675	0.150097	0.50393	1	3744	tags=44%, list=27%, signal=60%
GO_REGULATION_OF_LIPID_TRANSPORT	74	-0.126761	-1.30535	0.153226	0.505571	1	6835	tags=62%, list=50%, signal=123%
GO_RESPONSE_TO_BRONCHODILATOR	43	-0.16626	-1.30254	0.151329	0.509948	1	6054	tags=60%, list=44%, signal=107%
GO_INOSITOL_TRISPHOSPHATE_BIOSYNTHETIC_PROCESS	21	-0.23739	-1.30234	0.17562	0.509367	1	3956	tags=52%, list=29%, signal=73%
GO_GROWTH_PLATE_CARTILAGE_CHONDROCYTE_DIFFERENTIATION	20	-0.24109	-1.30207	0.17341	0.508957	1	4266	tags=55%, list=31%, signal=80%
GO_POSITIVE_REGULATION_OF_INTERLEUKIN_12_PRODUCTION	24	-0.219701	-1.30151	0.189024	0.509127	1	2148	tags=38%, list=16%, signal=44%
GO_CARDIAC_ATRIUM_DEVELOPMENT	25	-0.214517	-1.30107	0.151852	0.509036	1	3116	tags=44%, list=23%, signal=57%
GO_RESPONSE_TO_AMINE	39	-0.176976	-1.30038	0.152805	0.509402	1	6054	tags=62%, list=44%, signal=109%
GO_STRIATED_MUSCLE_CONTRACTION	138	-0.0954209	-1.30022	0.14257	0.508769	1	2096	tags=25%, list=15%, signal=29%
GO_INTERLEUKIN_1_SECRETION	31	-0.197297	-1.30018	0.150301	0.507862	1	4849	tags=55%, list=35%, signal=84%
GO_INSULIN_SECRETION_INVOLVED_IN_CELLULAR_RESPONSE_TO_GLUCOSE_STIMULUS	56	-0.146074	-1.30018	0.162109	0.5069	1	9323	tags=82%, list=68%, signal=253%
GO_NUCLEOTIDE_EXCISION_REPAIR_PREINCISION_COMPLEX_ASSEMBLY	28	-0.206156	-1.29906	0.158215	0.508211	1	8492	tags=82%, list=62%, signal=213%
GO_RESPONSE_TO_AMPHETAMINE	28	-0.204363	-1.29896	0.152866	0.507458	1	6054	tags=64%, list=44%, signal=114%
GO_ARF_PROTEIN_SIGNAL_TRANSDUCTION	19	-0.247734	-1.29876	0.15735	0.506922	1	6751	tags=74%, list=49%, signal=144%
GO_KERATINIZATION	31	-0.193	-1.29784	0.142857	0.507662	1	5353	tags=58%, list=39%, signal=95%
GO_POSITIVE_REGULATION_OF_NATURAL_KILLER_CELL_ACTIVATION	18	-0.253515	-1.29729	0.16875	0.507755	1	8768	tags=89%, list=64%, signal=244%
GO_ASTROCYTE_DIFFERENTIATION	67	-0.134967	-1.29474	0.164032	0.511805	1	7823	tags=70%, list=57%, signal=161%
GO_REGULATION_OF_FATTY_ACID_BETA_OXIDATION	17	-0.256925	-1.29362	0.16047	0.513067	1	2952	tags=47%, list=21%, signal=60%
GO_ENERGY_RESERVE_METABOLIC_PROCESS	72	-0.131806	-1.29222	0.160305	0.514904	1	3939	tags=42%, list=29%, signal=58%
GO_RETINA_DEVELOPMENT_IN_CAMERA_TYPE_EYE	114	-0.102519	-1.29212	0.15098	0.514143	1	2470	tags=28%, list=18%, signal=34%
GO_PROTEIN_TARGETING	393	-0.0568291	-1.29212	0.146893	0.513187	1	10118	tags=79%, list=73%, signal=288%
GO_COCHLEA_DEVELOPMENT	41	-0.17103	-1.29106	0.138211	0.514156	1	1013	tags=24%, list=7%, signal=26%
GO_REGULATION_OF_RESPONSE_TO_OXIDATIVE_STRESS	70	-0.129849	-1.28954	0.146341	0.516187	1	7282	tags=66%, list=53%, signal=139%
GO_VITAMIN_TRANSPORT	22	-0.225005	-1.28945	0.150713	0.515414	1	5679	tags=64%, list=41%, signal=108%
GO_NEURAL_NUCLEUS_DEVELOPMENT	52	-0.152529	-1.28925	0.158	0.514845	1	2414	tags=33%, list=18%, signal=39%
GO_EXOCYTIC_PROCESS	75	-0.125885	-1.28847	0.176938	0.515403	1	8020	tags=71%, list=58%, signal=168%
GO_AMINO_ACID_TRANSMEMBRANE_TRANSPORT	72	-0.129887	-1.28472	0.172691	0.521867	1	2433	tags=31%, list=18%, signal=37%
GO_CELLULAR_RESPONSE_TO_AMINO_ACID_STIMULUS	59	-0.141593	-1.28343	0.177551	0.523558	1	6004	tags=58%, list=44%, signal=102%
GO_REGULATION_OF_HOMOTYPIC_CELL_CELL_ADHESION	21	-0.230667	-1.28315	0.165975	0.523125	1	5362	tags=62%, list=39%, signal=101%
GO_REGULATION_OF_LONG_TERM_NEURONAL_SYNAPTIC_PLASTICITY	26	-0.212314	-1.28298	0.180608	0.52249	1	3974	tags=50%, list=29%, signal=70%
GO_CARTILAGE_DEVELOPMENT_INVOLVED_IN_ENDOCHONDRAL_BONE_MORPHOGENESIS	37	-0.177256	-1.28153	0.169734	0.524368	1	7254	tags=70%, list=53%, signal=148%
GO_CELL_JUNCTION_ASSEMBLY	220	-0.0763731	-1.28126	0.153386	0.523939	1	4669	tags=41%, list=34%, signal=62%
GO_MITOCHONDRIAL_TRANSLATION	135	-0.0937236	-1.28093	0.170498	0.523706	1	10469	tags=85%, list=76%, signal=350%
GO_RESPONSE_TO_LITHIUM_ION	19	-0.24611	-1.28064	0.146667	0.523289	1	3870	tags=53%, list=28%, signal=73%
GO_POLYOL_CATABOLIC_PROCESS	22	-0.221532	-1.27983	0.156716	0.523893	1	9488	tags=91%, list=69%, signal=291%
GO_REGULATION_OF_SYSTEMIC_ARTERIAL_BLOOD_PRESSURE_MEDIATED_BY_A_CHEMICAL_SIGNAL	30	-0.199048	-1.27956	0.152475	0.523463	1	3238	tags=43%, list=23%, signal=57%
GO_CERAMIDE_METABOLIC_PROCESS	20	-0.23686	-1.27849	0.175889	0.524533	1	7772	tags=80%, list=56%, signal=183%
GO_POSITIVE_REGULATION_OF_ERK1_AND_ERK2_CASCADE	138	-0.0903528	-1.27602	0.16996	0.528518	1	7062	tags=60%, list=51%, signal=122%
GO_NEGATIVE_REGULATION_OF_CARDIOCYTE_DIFFERENTIATION	17	-0.261516	-1.27439	0.18097	0.530732	1	3700	tags=53%, list=27%, signal=72%
GO_AMELOGENESIS	15	-0.270485	-1.27238	0.161017	0.533872	1	3630	tags=53%, list=26%, signal=72%
GO_POSITIVE_REGULATION_OF_PEPTIDE_SECRETION	188	-0.0802311	-1.27222	0.185687	0.533229	1	3311	tags=32%, list=24%, signal=41%
GO_REGULATION_OF_GLUCONEOGENESIS	31	-0.191966	-1.2719	0.165975	0.532974	1	2698	tags=39%, list=20%, signal=48%
GO_BILE_ACID_BIOSYNTHETIC_PROCESS	22	-0.227223	-1.27099	0.177914	0.533786	1	3141	tags=45%, list=23%, signal=59%
GO_REGULATION_OF_CATION_CHANNEL_ACTIVITY	151	-0.0879708	-1.27036	0.185321	0.534026	1	2089	tags=24%, list=15%, signal=28%
GO_NUCLEOSIDE_BISPHOSPHATE_METABOLIC_PROCESS	53	-0.148756	-1.27002	0.191837	0.533774	1	4983	tags=51%, list=36%, signal=79%
GO_NEGATIVE_REGULATION_OF_PROTEIN_POLYMERIZATION	61	-0.137935	-1.26959	0.190763	0.53361	1	8733	tags=77%, list=63%, signal=209%
GO_PHOSPHATIDYLINOSITOL_DEPHOSPHORYLATION	23	-0.225362	-1.26829	0.208092	0.535263	1	9490	tags=91%, list=69%, signal=292%
GO_CELL_CELL_SIGNALING_INVOLVED_IN_CARDIAC_CONDUCTION	30	-0.193191	-1.26748	0.187097	0.535994	1	4238	tags=50%, list=31%, signal=72%
GO_NEGATIVE_REGULATION_OF_CELL_ADHESION	207	-0.076566	-1.26733	0.185039	0.535382	1	5490	tags=47%, list=40%, signal=77%
GO_REGULATION_OF_SYNAPTIC_TRANSMISSION_GABAERGIC	30	-0.192595	-1.26606	0.172065	0.537012	1	6085	tags=63%, list=44%, signal=113%
GO_NEGATIVE_REGULATION_OF_PROTEIN_COMPLEX_ASSEMBLY	109	-0.104433	-1.26506	0.178344	0.538088	1	6037	tags=54%, list=44%, signal=96%
GO_REGULATION_OF_HORMONE_METABOLIC_PROCESS	26	-0.206843	-1.26485	0.180851	0.537564	1	6171	tags=65%, list=45%, signal=118%
GO_BLOOD_VESSEL_REMODELING	34	-0.184129	-1.26436	0.181633	0.537687	1	8014	tags=76%, list=58%, signal=182%
GO_MITOCHONDRIAL_TRANSPORT	231	-0.0712294	-1.26421	0.172414	0.537019	1	2259	tags=23%, list=16%, signal=27%
GO_POSITIVE_REGULATION_OF_SECRETION	298	-0.0642812	-1.26416	0.170974	0.536178	1	3345	tags=31%, list=24%, signal=39%
GO_CORNIFICATION	27	-0.204915	-1.26399	0.194444	0.535593	1	5353	tags=59%, list=39%, signal=97%
GO_ENDOCYTOSIS	453	-0.0528237	-1.26362	0.182857	0.535398	1	8186	tags=64%, list=59%, signal=153%
GO_REGULATION_OF_PEPTIDE_SECRETION	343	-0.0600891	-1.26302	0.184524	0.535658	1	3093	tags=28%, list=22%, signal=36%
GO_NEGATIVE_REGULATION_OF_MUSCLE_CELL_DIFFERENTIATION	42	-0.168407	-1.26299	0.173824	0.534799	1	3596	tags=43%, list=26%, signal=58%
GO_NEGATIVE_REGULATION_OF_GLIOGENESIS	33	-0.184098	-1.26207	0.168016	0.53567	1	2901	tags=39%, list=21%, signal=50%
GO_DEVELOPMENTAL_INDUCTION	23	-0.220173	-1.26075	0.185336	0.537375	1	7163	tags=74%, list=52%, signal=154%
GO_AMMONIUM_TRANSPORT	76	-0.127437	-1.25986	0.191579	0.538283	1	6056	tags=57%, list=44%, signal=100%
GO_POLYOL_METABOLIC_PROCESS	59	-0.137536	-1.25814	0.199566	0.540788	1	3956	tags=42%, list=29%, signal=59%
GO_CILIUM_ORGANIZATION	331	-0.0599	-1.25762	0.18677	0.540934	1	7736	tags=62%, list=56%, signal=138%
GO_DIVALENT_INORGANIC_CATION_HOMEOSTASIS	371	-0.0571953	-1.25543	0.175	0.544366	1	2802	tags=26%, list=20%, signal=32%
GO_RESPONSE_TO_GONADOTROPIN	22	-0.226685	-1.25393	0.178571	0.546513	1	5029	tags=59%, list=36%, signal=93%
GO_POSITIVE_REGULATION_OF_RESPONSE_TO_BIOTIC_STIMULUS	29	-0.196784	-1.25369	0.195029	0.546052	1	7755	tags=76%, list=56%, signal=173%
GO_INTRACELLULAR_STEROL_TRANSPORT	19	-0.231178	-1.25337	0.189409	0.545762	1	6979	tags=74%, list=51%, signal=149%
GO_ZINC_ION_HOMEOSTASIS	22	-0.22377	-1.25213	0.184426	0.547287	1	5696	tags=64%, list=41%, signal=108%
GO_PEPTIDE_HORMONE_SECRETION	195	-0.0786815	-1.25114	0.196653	0.548369	1	1548	tags=19%, list=11%, signal=21%
GO_XENOBIOTIC_METABOLIC_PROCESS	59	-0.14052	-1.25098	0.198077	0.54777	1	4850	tags=49%, list=35%, signal=75%
GO_SCHWANN_CELL_DIFFERENTIATION	37	-0.174015	-1.24835	0.189189	0.552229	1	3944	tags=46%, list=29%, signal=64%
GO_AMMONIUM_ION_METABOLIC_PROCESS	42	-0.165399	-1.24831	0.187243	0.55138	1	7906	tags=74%, list=57%, signal=172%
GO_NEGATIVE_REGULATION_OF_STEROID_METABOLIC_PROCESS	19	-0.243511	-1.24807	0.2	0.550944	1	7535	tags=79%, list=55%, signal=174%
GO_CELLULAR_RESPONSE_TO_CAMP	45	-0.157753	-1.24768	0.187629	0.550863	1	2736	tags=36%, list=20%, signal=44%
GO_MYELOID_LEUKOCYTE_ACTIVATION	494	-0.0501793	-1.24676	0.204322	0.551834	1	4973	tags=41%, list=36%, signal=62%
GO_RESPIRATORY_GASEOUS_EXCHANGE	51	-0.146678	-1.245	0.215031	0.554484	1	6098	tags=59%, list=44%, signal=105%
GO_POSITIVE_REGULATION_OF_TRANSMEMBRANE_TRANSPORT	160	-0.0855219	-1.24497	0.184426	0.553612	1	2283	tags=25%, list=17%, signal=30%
GO_PROTEIN_TARGETING_TO_MEMBRANE	179	-0.0796742	-1.24289	0.180583	0.556905	1	10165	tags=82%, list=74%, signal=306%
GO_RESPONSE_TO_NICOTINE	36	-0.17327	-1.24266	0.193424	0.556483	1	3747	tags=44%, list=27%, signal=61%
GO_GLUTATHIONE_METABOLIC_PROCESS	32	-0.186001	-1.24121	0.219758	0.558566	1	8647	tags=81%, list=63%, signal=217%
GO_CELLULAR_AMINO_ACID_BIOSYNTHETIC_PROCESS	56	-0.139115	-1.24009	0.200795	0.55997	1	1538	tags=25%, list=11%, signal=28%
GO_NEGATIVE_REGULATION_OF_MUSCLE_CONTRACTION	22	-0.231138	-1.23837	0.204969	0.562412	1	8102	tags=82%, list=59%, signal=198%
GO_REGULATION_OF_OXIDATIVE_PHOSPHORYLATION	23	-0.213753	-1.23759	0.193424	0.563038	1	7851	tags=78%, list=57%, signal=181%
GO_SARCOMERE_ORGANIZATION	34	-0.176697	-1.23705	0.185039	0.563141	1	7305	tags=71%, list=53%, signal=150%
GO_INTRINSIC_APOPTOTIC_SIGNALING_PATHWAY_IN_RESPONSE_TO_OXIDATIVE_STRESS	39	-0.169251	-1.23682	0.206074	0.562687	1	5453	tags=56%, list=40%, signal=93%
GO_LONG_CHAIN_FATTY_ACID_BIOSYNTHETIC_PROCESS	16	-0.253244	-1.23473	0.193684	0.566034	1	4270	tags=56%, list=31%, signal=81%
GO_REGULATION_OF_CELL_SUBSTRATE_ADHESION	178	-0.0789662	-1.23464	0.212181	0.56529	1	2490	tags=26%, list=18%, signal=31%
GO_MYELOID_LEUKOCYTE_MEDIATED_IMMUNITY	433	-0.053142	-1.23413	0.190965	0.565433	1	7381	tags=59%, list=54%, signal=122%
GO_REGULATION_OF_URINE_VOLUME	16	-0.26029	-1.23295	0.187755	0.566983	1	3311	tags=50%, list=24%, signal=66%
GO_POSITIVE_REGULATION_OF_MEIOTIC_CELL_CYCLE	16	-0.254446	-1.2312	0.191321	0.569527	1	10287	tags=100%, list=75%, signal=393%
GO_REGULATION_OF_CARBOHYDRATE_BIOSYNTHETIC_PROCESS	77	-0.11979	-1.23096	0.226337	0.569097	1	3194	tags=35%, list=23%, signal=45%
GO_CELL_DEATH_IN_RESPONSE_TO_HYDROGEN_PEROXIDE	25	-0.205041	-1.22935	0.218143	0.571496	1	5453	tags=60%, list=40%, signal=99%
GO_REGULATION_OF_EPIDERMIS_DEVELOPMENT	55	-0.140782	-1.22884	0.214141	0.571616	1	10103	tags=87%, list=73%, signal=325%
GO_PEPTIDE_SECRETION	436	-0.0505783	-1.22654	0.2	0.575346	1	3311	tags=29%, list=24%, signal=37%
GO_REGULATION_OF_CELLULAR_RESPONSE_TO_DRUG	23	-0.213722	-1.22646	0.216634	0.574563	1	5453	tags=61%, list=40%, signal=101%
GO_RESPONSE_TO_THYROID_HORMONE	19	-0.230548	-1.2264	0.219844	0.573739	1	5536	tags=63%, list=40%, signal=105%
GO_PHOSPHATIDYLCHOLINE_METABOLIC_PROCESS	23	-0.207428	-1.22516	0.207171	0.575305	1	1942	tags=35%, list=14%, signal=40%
GO_SPINAL_CORD_DEVELOPMENT	76	-0.117175	-1.22501	0.204545	0.574714	1	2749	tags=32%, list=20%, signal=39%
GO_POSITIVE_REGULATION_OF_MUSCLE_CELL_APOPTOTIC_PROCESS	22	-0.220106	-1.22112	0.22449	0.581714	1	3239	tags=45%, list=23%, signal=59%
GO_POSITIVE_REGULATION_OF_EXOCYTOSIS	72	-0.122977	-1.22095	0.220238	0.581133	1	10381	tags=88%, list=75%, signal=352%
GO_DETECTION_OF_MECHANICAL_STIMULUS_INVOLVED_IN_SENSORY_PERCEPTION	20	-0.229511	-1.22091	0.211045	0.580282	1	5115	tags=60%, list=37%, signal=95%
GO_NEGATIVE_REGULATION_OF_ACTIN_FILAMENT_POLYMERIZATION	48	-0.146165	-1.22083	0.220472	0.579509	1	6037	tags=58%, list=44%, signal=103%
GO_PLASMA_MEMBRANE_ORGANIZATION	81	-0.119016	-1.22007	0.217742	0.580065	1	6712	tags=60%, list=49%, signal=117%
GO_ICOSANOID_METABOLIC_PROCESS	52	-0.145294	-1.21933	0.210526	0.58069	1	7022	tags=65%, list=51%, signal=133%
GO_ACYLGLYCEROL_METABOLIC_PROCESS	43	-0.152443	-1.218	0.214286	0.582552	1	8489	tags=77%, list=62%, signal=199%
GO_RHYTHMIC_BEHAVIOR	34	-0.177747	-1.21443	0.229287	0.589042	1	3640	tags=44%, list=26%, signal=60%
GO_REGULATION_OF_NEUROTRANSMITTER_LEVELS	282	-0.0630408	-1.21252	0.234469	0.592156	1	3942	tags=35%, list=29%, signal=48%
GO_TOR_SIGNALING	100	-0.104824	-1.21116	0.220907	0.594036	1	6013	tags=54%, list=44%, signal=95%
GO_SUPEROXIDE_METABOLIC_PROCESS	48	-0.148107	-1.21054	0.231076	0.594439	1	5723	tags=56%, list=41%, signal=96%
GO_PROTEIN_HYDROXYLATION	26	-0.199466	-1.21022	0.221053	0.594185	1	3090	tags=42%, list=22%, signal=54%
GO_CELLULAR_RESPONSE_TO_CARBOHYDRATE_STIMULUS	120	-0.0948302	-1.21004	0.234694	0.593621	1	1118	tags=18%, list=8%, signal=19%
GO_PRIMARY_ALCOHOL_METABOLIC_PROCESS	43	-0.153834	-1.20933	0.207171	0.594119	1	7187	tags=67%, list=52%, signal=140%
GO_ANTIGEN_PROCESSING_AND_PRESENTATION_OF_PEPTIDE_OR_POLYSACCHARIDE_ANTIGEN_VIA_MHC_CLASS_II	86	-0.110617	-1.20842	0.21172	0.595115	1	2494	tags=29%, list=18%, signal=35%
GO_VIRAL_BUDDING	24	-0.205982	-1.20806	0.215726	0.594946	1	9807	tags=92%, list=71%, signal=317%
GO_REGULATION_OF_TISSUE_REMODELING	52	-0.141363	-1.20762	0.232877	0.594908	1	7076	tags=65%, list=51%, signal=134%
GO_REGULATION_OF_MACROAUTOPHAGY	156	-0.0829751	-1.2075	0.223485	0.594217	1	7268	tags=61%, list=53%, signal=127%
GO_ACROSOME_REACTION	17	-0.249225	-1.20733	0.239754	0.593621	1	6303	tags=71%, list=46%, signal=130%
GO_HYPEROSMOTIC_RESPONSE	22	-0.217874	-1.20687	0.229445	0.593622	1	2016	tags=36%, list=15%, signal=43%
GO_NEGATIVE_REGULATION_OF_HEART_CONTRACTION	21	-0.219328	-1.20641	0.238189	0.593641	1	8145	tags=81%, list=59%, signal=197%
GO_POSITIVE_REGULATION_OF_PROTEIN_OLIGOMERIZATION	20	-0.217392	-1.20288	0.232742	0.600321	1	6661	tags=70%, list=48%, signal=135%
GO_RESPONSE_TO_KETONE	163	-0.0802818	-1.20135	0.22549	0.602661	1	2122	tags=23%, list=15%, signal=27%
GO_CELLULAR_TRANSITION_METAL_ION_HOMEOSTASIS	87	-0.106684	-1.20113	0.225806	0.602169	1	3136	tags=33%, list=23%, signal=43%
GO_PRODUCTION_OF_MOLECULAR_MEDIATOR_INVOLVED_IN_INFLAMMATORY_RESPONSE	50	-0.142083	-1.19993	0.221569	0.60375	1	11288	tags=96%, list=82%, signal=527%
GO_POSITIVE_REGULATION_OF_EPITHELIAL_CELL_PROLIFERATION	150	-0.0857063	-1.19958	0.236515	0.603545	1	3245	tags=32%, list=24%, signal=41%
GO_LOW_DENSITY_LIPOPROTEIN_PARTICLE_CLEARANCE	27	-0.198109	-1.19941	0.232601	0.602986	1	6979	tags=70%, list=51%, signal=142%
GO_DETECTION_OF_STIMULUS_INVOLVED_IN_SENSORY_PERCEPTION	56	-0.134855	-1.19886	0.22334	0.603261	1	4798	tags=48%, list=35%, signal=74%
GO_PHENOL_CONTAINING_COMPOUND_METABOLIC_PROCESS	42	-0.156359	-1.19789	0.241517	0.604388	1	4090	tags=45%, list=30%, signal=64%
GO_PROTEIN_HOMOTETRAMERIZATION	65	-0.125728	-1.19748	0.230769	0.604296	1	4216	tags=43%, list=31%, signal=62%
GO_EPIDERMIS_MORPHOGENESIS	21	-0.215935	-1.19741	0.238	0.603505	1	7535	tags=76%, list=55%, signal=168%
GO_NEGATIVE_REGULATION_OF_SMOOTH_MUSCLE_CELL_PROLIFERATION	40	-0.164057	-1.19723	0.231092	0.602933	1	3951	tags=45%, list=29%, signal=63%
GO_BONE_GROWTH	37	-0.163056	-1.19583	0.220238	0.604953	1	3722	tags=43%, list=27%, signal=59%
GO_REGULATION_OF_LIPID_LOCALIZATION	96	-0.105415	-1.19504	0.217131	0.605825	1	3298	tags=34%, list=24%, signal=45%
GO_INTERLEUKIN_4_PRODUCTION	22	-0.219059	-1.19488	0.228283	0.60524	1	5134	tags=59%, list=37%, signal=94%
GO_ANION_HOMEOSTASIS	39	-0.160189	-1.19473	0.247401	0.604649	1	5224	tags=54%, list=38%, signal=86%
GO_ENERGY_COUPLED_PROTON_TRANSPORT_DOWN_ELECTROCHEMICAL_GRADIENT	21	-0.217159	-1.19342	0.231068	0.606417	1	5548	tags=62%, list=40%, signal=103%
GO_RESPONSE_TO_PEPTIDE_HORMONE	348	-0.055053	-1.192	0.239669	0.608497	1	3422	tags=30%, list=25%, signal=39%
GO_MULTICELLULAR_ORGANISMAL_HOMEOSTASIS	364	-0.0533037	-1.18973	0.231557	0.612467	1	3756	tags=32%, list=27%, signal=43%
GO_SYNAPTIC_VESICLE_CLUSTERING	15	-0.253397	-1.18929	0.229508	0.612489	1	7543	tags=80%, list=55%, signal=176%
GO_REGULATION_OF_LEUKOCYTE_DEGRANULATION	34	-0.172124	-1.18913	0.244399	0.611936	1	9396	tags=85%, list=68%, signal=267%
GO_NEGATIVE_REGULATION_OF_INSULIN_SECRETION	32	-0.172803	-1.18674	0.227181	0.616115	1	3226	tags=41%, list=23%, signal=53%
GO_ESTABLISHMENT_OF_PROTEIN_LOCALIZATION_TO_MEMBRANE	302	-0.0591117	-1.18663	0.242798	0.615397	1	11990	tags=93%, list=87%, signal=694%
GO_CHROMOSOME_ORGANIZATION_INVOLVED_IN_MEIOTIC_CELL_CYCLE	43	-0.152568	-1.18415	0.214894	0.619884	1	8808	tags=79%, list=64%, signal=218%
GO_CELLULAR_RESPONSE_TO_EXTERNAL_STIMULUS	280	-0.0604169	-1.18357	0.237805	0.620174	1	10119	tags=79%, list=73%, signal=292%
GO_DRUG_TRANSMEMBRANE_TRANSPORT	67	-0.120598	-1.183	0.235178	0.620435	1	5756	tags=54%, list=42%, signal=92%
GO_CELL_COMMUNICATION_BY_ELECTRICAL_COUPLING	28	-0.186608	-1.18297	0.254509	0.619565	1	1373	tags=29%, list=10%, signal=32%
GO_POSITIVE_REGULATION_OF_SODIUM_ION_TRANSMEMBRANE_TRANSPORTER_ACTIVITY	15	-0.252628	-1.1829	0.244306	0.618776	1	3876	tags=53%, list=28%, signal=74%
GO_NEGATIVE_REGULATION_OF_LIPID_LOCALIZATION	29	-0.184175	-1.1828	0.264259	0.618068	1	3173	tags=41%, list=23%, signal=54%
GO_VESICLE_DOCKING	61	-0.126764	-1.18252	0.2334	0.617763	1	2330	tags=30%, list=17%, signal=35%
GO_REGULATION_OF_PROTEIN_EXIT_FROM_ENDOPLASMIC_RETICULUM	23	-0.20338	-1.18239	0.22428	0.617059	1	6195	tags=65%, list=45%, signal=118%
GO_BROWN_FAT_CELL_DIFFERENTIATION	32	-0.176564	-1.17979	0.256673	0.621692	1	6622	tags=66%, list=48%, signal=126%
GO_PURINE_CONTAINING_COMPOUND_CATABOLIC_PROCESS	44	-0.146956	-1.17946	0.229412	0.621448	1	3936	tags=43%, list=29%, signal=60%
GO_REGULATION_OF_TRIGLYCERIDE_BIOSYNTHETIC_PROCESS	15	-0.252758	-1.17921	0.228963	0.621078	1	10310	tags=100%, list=75%, signal=396%
GO_HORMONE_TRANSPORT	243	-0.0644458	-1.17844	0.240246	0.621804	1	1171	tags=15%, list=8%, signal=16%
GO_MEIOTIC_CHROMOSOME_SEPARATION	17	-0.235085	-1.17834	0.26087	0.621094	1	7309	tags=76%, list=53%, signal=162%
GO_ERROR_PRONE_TRANSLESION_SYNTHESIS	20	-0.225379	-1.17795	0.260194	0.621024	1	6551	tags=70%, list=48%, signal=133%
GO_GROWTH_PLATE_CARTILAGE_DEVELOPMENT	29	-0.178838	-1.17696	0.251451	0.622223	1	3722	tags=45%, list=27%, signal=61%
GO_POSITIVE_REGULATION_OF_CELL_JUNCTION_ASSEMBLY	32	-0.171931	-1.17607	0.262295	0.623173	1	3238	tags=41%, list=23%, signal=53%
GO_REGULATION_OF_LIPID_STORAGE	35	-0.170427	-1.17604	0.262712	0.622291	1	3173	tags=40%, list=23%, signal=52%
GO_PROTEIN_DEPOLYMERIZATION	96	-0.102556	-1.17574	0.248509	0.622003	1	5492	tags=50%, list=40%, signal=83%
GO_ASTROCYTE_DEVELOPMENT	33	-0.16966	-1.17559	0.240987	0.621374	1	1428	tags=27%, list=10%, signal=30%
GO_EPIDERMAL_CELL_DIFFERENTIATION	127	-0.0874613	-1.17436	0.247126	0.623077	1	4887	tags=44%, list=35%, signal=68%
GO_NATURAL_KILLER_CELL_ACTIVATION	42	-0.152219	-1.17401	0.26494	0.622913	1	9729	tags=86%, list=71%, signal=290%
GO_GLYCOGEN_BIOSYNTHETIC_PROCESS	41	-0.153933	-1.17343	0.257874	0.623257	1	3939	tags=44%, list=29%, signal=61%
GO_POSITIVE_REGULATION_OF_MYOTUBE_DIFFERENTIATION	20	-0.21758	-1.17319	0.274549	0.622902	1	1142	tags=30%, list=8%, signal=33%
GO_POSITIVE_REGULATION_OF_INTERLEUKIN_1_PRODUCTION	30	-0.178039	-1.17238	0.245545	0.623693	1	2148	tags=33%, list=16%, signal=39%
GO_NEGATIVE_REGULATION_OF_RESPONSE_TO_BIOTIC_STIMULUS	31	-0.176203	-1.17236	0.237817	0.622814	1	6029	tags=61%, list=44%, signal=109%
GO_NEGATIVE_REGULATION_OF_BLOOD_VESSEL_DIAMETER	61	-0.126497	-1.16998	0.258824	0.62707	1	3238	tags=36%, list=23%, signal=47%
GO_CHONDROITIN_SULFATE_PROTEOGLYCAN_METABOLIC_PROCESS	34	-0.166347	-1.16985	0.25	0.626448	1	7853	tags=74%, list=57%, signal=170%
GO_INTERLEUKIN_1_PRODUCTION	57	-0.131855	-1.16979	0.263048	0.625677	1	3271	tags=37%, list=24%, signal=48%
GO_PHOTORECEPTOR_CELL_MAINTENANCE	28	-0.179788	-1.1671	0.251451	0.63054	1	3437	tags=43%, list=25%, signal=57%
GO_REGULATION_OF_BODY_FLUID_LEVELS	362	-0.0552887	-1.16613	0.269939	0.631678	1	4173	tags=36%, list=30%, signal=50%
GO_POSITIVE_REGULATION_OF_HEART_RATE	20	-0.216045	-1.16587	0.271484	0.63128	1	5990	tags=65%, list=43%, signal=115%
GO_REGULATION_OF_T_CELL_DIFFERENTIATION_IN_THYMUS	19	-0.220168	-1.16482	0.251521	0.632598	1	10034	tags=95%, list=73%, signal=347%
GO_NEGATIVE_REGULATION_OF_CARDIAC_MUSCLE_TISSUE_DEVELOPMENT	26	-0.191838	-1.16477	0.266385	0.631787	1	3195	tags=42%, list=23%, signal=55%
GO_NEGATIVE_REGULATION_OF_REACTIVE_OXYGEN_SPECIES_METABOLIC_PROCESS	22	-0.204296	-1.16435	0.255578	0.631758	1	6591	tags=68%, list=48%, signal=130%
GO_REGULATION_OF_LYMPHOCYTE_MIGRATION	35	-0.16602	-1.16407	0.271457	0.631427	1	8356	tags=77%, list=61%, signal=195%
GO_TELOMERE_CAPPING	38	-0.160493	-1.16383	0.274793	0.631057	1	5778	tags=58%, list=42%, signal=99%
GO_RETINA_VASCULATURE_DEVELOPMENT_IN_CAMERA_TYPE_EYE	17	-0.235597	-1.16317	0.270876	0.631571	1	4057	tags=53%, list=29%, signal=75%
GO_REGULATION_OF_MITOCHONDRIAL_TRANSLATION	25	-0.191405	-1.16121	0.258799	0.634885	1	6744	tags=68%, list=49%, signal=133%
GO_RESPONSE_TO_COLD	43	-0.153775	-1.16119	0.252964	0.634023	1	2377	tags=33%, list=17%, signal=39%
GO_ESTABLISHMENT_OF_PROTEIN_LOCALIZATION_TO_ENDOPLASMIC_RETICULUM	108	-0.0945678	-1.16034	0.252567	0.634993	1	6241	tags=55%, list=45%, signal=99%
GO_POSITIVE_REGULATION_OF_CELL_SUBSTRATE_ADHESION	103	-0.0966965	-1.15944	0.265537	0.636022	1	2962	tags=31%, list=21%, signal=39%
GO_CELL_COMMUNICATION_INVOLVED_IN_CARDIAC_CONDUCTION	52	-0.138523	-1.15877	0.253036	0.636526	1	2076	tags=29%, list=15%, signal=34%
GO_CILIARY_BASAL_BODY_PLASMA_MEMBRANE_DOCKING	95	-0.101669	-1.15836	0.272374	0.636483	1	9351	tags=78%, list=68%, signal=240%
GO_POSITIVE_REGULATION_OF_CYSTEINE_TYPE_ENDOPEPTIDASE_ACTIVITY	115	-0.0925303	-1.15816	0.27881	0.636015	1	7250	tags=62%, list=53%, signal=129%
GO_PEROXISOMAL_TRANSPORT	63	-0.124924	-1.15744	0.25098	0.636653	1	5291	tags=51%, list=38%, signal=82%
GO_POSITIVE_REGULATION_OF_CELL_MATRIX_ADHESION	44	-0.149408	-1.15706	0.256461	0.636585	1	2962	tags=36%, list=21%, signal=46%
GO_INTERLEUKIN_6_SECRETION	25	-0.193517	-1.15691	0.238659	0.636026	1	5060	tags=56%, list=37%, signal=88%
GO_PYRIDINE_CONTAINING_COMPOUND_METABOLIC_PROCESS	33	-0.166376	-1.15552	0.27	0.638105	1	6906	tags=67%, list=50%, signal=133%
GO_ORGANELLE_DISASSEMBLY	90	-0.103209	-1.1542	0.282306	0.640002	1	7168	tags=62%, list=52%, signal=129%
GO_DENDRITIC_CELL_DIFFERENTIATION	26	-0.190011	-1.15212	0.253138	0.643631	1	4281	tags=50%, list=31%, signal=72%
GO_MAINTENANCE_OF_CELL_POLARITY	16	-0.239024	-1.15211	0.261663	0.642771	1	2742	tags=44%, list=20%, signal=55%
GO_POSITIVE_REGULATION_OF_EPIDERMIS_DEVELOPMENT	25	-0.193137	-1.15096	0.257081	0.644332	1	10030	tags=92%, list=73%, signal=337%
GO_INTERSTRAND_CROSS_LINK_REPAIR	50	-0.134262	-1.14974	0.28131	0.646056	1	10568	tags=90%, list=77%, signal=384%
GO_AMINOGLYCAN_METABOLIC_PROCESS	122	-0.09076	-1.14968	0.286316	0.645263	1	3169	tags=32%, list=23%, signal=41%
GO_SYNAPTIC_VESICLE_EXOCYTOSIS	113	-0.0924655	-1.14941	0.286	0.644925	1	6303	tags=55%, list=46%, signal=100%
GO_RESPONSE_TO_STEROID_HORMONE	312	-0.0552968	-1.14864	0.278	0.645539	1	2615	tags=24%, list=19%, signal=29%
GO_TRABECULA_MORPHOGENESIS	43	-0.146678	-1.14761	0.28	0.646843	1	3116	tags=37%, list=23%, signal=48%
GO_NEGATIVE_REGULATION_OF_PLASMA_MEMBRANE_BOUNDED_CELL_PROJECTION_ASSEMBLY	21	-0.208953	-1.14737	0.28125	0.646456	1	10258	tags=95%, list=74%, signal=371%
GO_REGULATION_OF_HEART_RATE	81	-0.109442	-1.14696	0.258979	0.646459	1	2076	tags=26%, list=15%, signal=30%
GO_RESPONSE_TO_ENDOPLASMIC_RETICULUM_STRESS	247	-0.0632932	-1.14673	0.269618	0.64605	1	5453	tags=46%, list=40%, signal=74%
GO_NEGATIVE_REGULATION_OF_PROTEIN_KINASE_B_SIGNALING	37	-0.159983	-1.14637	0.293666	0.645968	1	4137	tags=46%, list=30%, signal=65%
GO_POSITIVE_REGULATION_OF_INSULIN_SECRETION_INVOLVED_IN_CELLULAR_RESPONSE_TO_GLUCOSE_STIMULUS	27	-0.1855	-1.14586	0.280876	0.646151	1	6131	tags=63%, list=44%, signal=113%
GO_POSITIVE_REGULATION_OF_SMALL_MOLECULE_METABOLIC_PROCESS	77	-0.111689	-1.14487	0.277445	0.647435	1	3126	tags=34%, list=23%, signal=43%
GO_HISTONE_PHOSPHORYLATION	32	-0.169644	-1.14447	0.295918	0.647451	1	9734	tags=88%, list=71%, signal=297%
GO_REGULATION_OF_VASCULAR_ENDOTHELIAL_GROWTH_FACTOR_RECEPTOR_SIGNALING_PATHWAY	31	-0.171598	-1.14204	0.280083	0.652005	1	3868	tags=45%, list=28%, signal=63%
GO_PYRIMIDINE_NUCLEOSIDE_TRIPHOSPHATE_BIOSYNTHETIC_PROCESS	17	-0.229302	-1.14194	0.279503	0.651343	1	1710	tags=35%, list=12%, signal=40%
GO_ENDOPLASMIC_RETICULUM_CALCIUM_ION_HOMEOSTASIS	22	-0.199212	-1.1407	0.300216	0.653193	1	6661	tags=68%, list=48%, signal=132%
GO_POSITIVE_REGULATION_OF_GLYCOGEN_METABOLIC_PROCESS	16	-0.240399	-1.1407	0.282158	0.652296	1	3585	tags=50%, list=26%, signal=67%
GO_MITOCHONDRIAL_DEPOLARIZATION	22	-0.202989	-1.13889	0.288235	0.655323	1	6609	tags=68%, list=48%, signal=131%
GO_SNARE_COMPLEX_ASSEMBLY	16	-0.239678	-1.13887	0.290061	0.654487	1	2733	tags=44%, list=20%, signal=54%
GO_REGULATION_OF_IMMUNE_EFFECTOR_PROCESS	255	-0.0610642	-1.13878	0.289272	0.653811	1	9396	tags=74%, list=68%, signal=228%
GO_THIOESTER_METABOLIC_PROCESS	39	-0.153298	-1.13858	0.286527	0.653395	1	6026	tags=59%, list=44%, signal=104%
GO_PEPTIDE_METABOLIC_PROCESS	95	-0.0984036	-1.13789	0.265086	0.653947	1	4460	tags=42%, list=32%, signal=62%
GO_TUMOR_NECROSIS_FACTOR_SUPERFAMILY_CYTOKINE_PRODUCTION	109	-0.0924801	-1.13786	0.259259	0.653123	1	8731	tags=72%, list=63%, signal=196%
GO_CHONDROITIN_SULFATE_PROTEOGLYCAN_BIOSYNTHETIC_PROCESS	28	-0.181011	-1.13774	0.280514	0.652502	1	7853	tags=75%, list=57%, signal=174%
GO_SUPEROXIDE_ANION_GENERATION	21	-0.208196	-1.13552	0.282651	0.656366	1	4358	tags=52%, list=32%, signal=76%
GO_NEGATIVE_REGULATION_OF_COAGULATION	36	-0.162862	-1.1353	0.3	0.655991	1	3124	tags=39%, list=23%, signal=50%
GO_REGULATION_OF_VASOCONSTRICTION	43	-0.143583	-1.13432	0.298755	0.657225	1	3800	tags=42%, list=28%, signal=58%
GO_CATECHOLAMINE_METABOLIC_PROCESS	28	-0.178849	-1.13431	0.295635	0.65635	1	4435	tags=50%, list=32%, signal=74%
GO_CLATHRIN_COAT_ASSEMBLY	18	-0.218846	-1.13401	0.280392	0.656117	1	6947	tags=72%, list=50%, signal=145%
GO_PEPTIDYL_CYSTEINE_MODIFICATION	40	-0.151207	-1.1338	0.286008	0.65568	1	8265	tags=75%, list=60%, signal=187%
GO_REGULATION_OF_ANTIGEN_PROCESSING_AND_PRESENTATION	15	-0.244846	-1.13348	0.281124	0.655481	1	1225	tags=33%, list=9%, signal=37%
GO_STEROID_HORMONE_SECRETION	16	-0.23377	-1.13307	0.300626	0.655465	1	7986	tags=81%, list=58%, signal=193%
GO_NUCLEOBASE_CONTAINING_SMALL_MOLECULE_METABOLIC_PROCESS	296	-0.0579103	-1.13287	0.296992	0.655043	1	6115	tags=50%, list=44%, signal=88%
GO_REGULATION_OF_KERATINOCYTE_PROLIFERATION	22	-0.199935	-1.13243	0.293774	0.655139	1	2263	tags=36%, list=16%, signal=43%
GO_NCRNA_3_END_PROCESSING	31	-0.168133	-1.12925	0.284585	0.661324	1	9699	tags=87%, list=70%, signal=293%
GO_CELL_DEATH_IN_RESPONSE_TO_OXIDATIVE_STRESS	72	-0.111518	-1.12905	0.292157	0.66088	1	7282	tags=64%, list=53%, signal=135%
GO_ACUTE_PHASE_RESPONSE	20	-0.210373	-1.12869	0.299213	0.660747	1	4689	tags=55%, list=34%, signal=83%
GO_COFACTOR_CATABOLIC_PROCESS	40	-0.146478	-1.12759	0.30303	0.662235	1	11433	tags=98%, list=83%, signal=569%
GO_POSITIVE_REGULATION_OF_LIPID_KINASE_ACTIVITY	31	-0.171997	-1.12745	0.293522	0.66163	1	5642	tags=58%, list=41%, signal=98%
GO_NEGATIVE_REGULATION_OF_HYDROLASE_ACTIVITY	305	-0.0558697	-1.12744	0.296223	0.660752	1	6030	tags=49%, list=44%, signal=85%
GO_CELLULAR_RESPONSE_TO_OSMOTIC_STRESS	33	-0.164374	-1.12698	0.295276	0.660822	1	9441	tags=85%, list=68%, signal=268%
GO_PHOSPHATIDYLINOSITOL_3_KINASE_SIGNALING	121	-0.0899497	-1.12695	0.309434	0.66002	1	5154	tags=46%, list=37%, signal=73%
GO_HAIR_CELL_DIFFERENTIATION	27	-0.177419	-1.12667	0.284047	0.659703	1	11350	tags=100%, list=82%, signal=564%
GO_FATTY_ACID_DERIVATIVE_TRANSPORT	28	-0.176355	-1.12556	0.30572	0.6612	1	6932	tags=68%, list=50%, signal=136%
GO_RESPONSE_TO_TUMOR_NECROSIS_FACTOR	215	-0.0671938	-1.12524	0.318658	0.661008	1	9865	tags=78%, list=72%, signal=270%
GO_MYOTUBE_DIFFERENTIATION	76	-0.110019	-1.12512	0.308851	0.660392	1	1214	tags=20%, list=9%, signal=22%
GO_CARDIAC_CHAMBER_MORPHOGENESIS	101	-0.0959072	-1.12432	0.311765	0.661231	1	3194	tags=33%, list=23%, signal=42%
GO_REGULATION_OF_SODIUM_ION_TRANSMEMBRANE_TRANSPORT	56	-0.130636	-1.12393	0.309237	0.66116	1	2147	tags=29%, list=16%, signal=34%
GO_TOLL_LIKE_RECEPTOR_3_SIGNALING_PATHWAY	18	-0.217007	-1.1233	0.305785	0.661638	1	5440	tags=61%, list=39%, signal=101%
GO_REGULATION_OF_NEUROTRANSMITTER_TRANSPORT	124	-0.0867253	-1.12324	0.285714	0.660908	1	3042	tags=31%, list=22%, signal=39%
GO_POSITIVE_REGULATION_OF_BLOOD_PRESSURE	26	-0.185331	-1.12301	0.286853	0.660567	1	3815	tags=46%, list=28%, signal=64%
GO_PYRUVATE_METABOLIC_PROCESS	20	-0.209894	-1.12258	0.300195	0.660672	1	10212	tags=95%, list=74%, signal=366%
GO_REGULATION_OF_MYELINATION	34	-0.1636	-1.12245	0.285996	0.660065	1	3429	tags=41%, list=25%, signal=55%
GO_GAMMA_AMINOBUTYRIC_ACID_SIGNALING_PATHWAY	20	-0.207127	-1.1222	0.321773	0.65978	1	8871	tags=85%, list=64%, signal=238%
GO_POSITIVE_REGULATION_OF_IMMUNE_EFFECTOR_PROCESS	138	-0.0835045	-1.12177	0.314961	0.659889	1	9454	tags=77%, list=69%, signal=242%
GO_AZOLE_TRANSPORT	17	-0.233184	-1.12135	0.326923	0.659952	1	3279	tags=47%, list=24%, signal=62%
GO_RESPONSE_TO_XENOBIOTIC_STIMULUS	204	-0.0685441	-1.12084	0.292683	0.660204	1	6168	tags=51%, list=45%, signal=92%
GO_NUCLEOTIDE_EXCISION_REPAIR_DNA_DUPLEX_UNWINDING	21	-0.201992	-1.1208	0.308765	0.659445	1	7727	tags=76%, list=56%, signal=173%
GO_LIPOPROTEIN_METABOLIC_PROCESS	15	-0.236919	-1.1204	0.30695	0.659432	1	3173	tags=47%, list=23%, signal=61%
GO_MUSCLE_CELL_MIGRATION	72	-0.113094	-1.11834	0.309804	0.663052	1	3238	tags=35%, list=23%, signal=45%
GO_REGULATION_OF_ERAD_PATHWAY	29	-0.177949	-1.11784	0.322835	0.663309	1	6112	tags=62%, list=44%, signal=111%
GO_REGULATION_OF_CARDIAC_MUSCLE_CELL_ACTION_POTENTIAL	25	-0.188424	-1.11575	0.294347	0.667006	1	717	tags=24%, list=5%, signal=25%
GO_PEPTIDE_CROSS_LINKING	21	-0.20166	-1.11528	0.313525	0.667198	1	4448	tags=52%, list=32%, signal=77%
GO_HOMOLOGOUS_CHROMOSOME_SEGREGATION	35	-0.160057	-1.11351	0.308	0.669983	1	8044	tags=74%, list=58%, signal=178%
GO_MICROTUBULE_NUCLEATION	26	-0.178552	-1.11294	0.322917	0.670389	1	6030	tags=62%, list=44%, signal=109%
GO_TISSUE_REMODELING	121	-0.0867352	-1.11289	0.303279	0.669619	1	9529	tags=78%, list=69%, signal=249%
GO_REGULATION_OF_SYNAPTIC_VESICLE_ENDOCYTOSIS	18	-0.216995	-1.10997	0.315789	0.675123	1	9271	tags=89%, list=67%, signal=271%
GO_NUCLEOTIDE_EXCISION_REPAIR	102	-0.0940923	-1.10981	0.30426	0.674585	1	8583	tags=72%, list=62%, signal=188%
GO_INTERMEDIATE_FILAMENT_ORGANIZATION	17	-0.223998	-1.10881	0.329317	0.675859	1	5028	tags=59%, list=36%, signal=92%
GO_RETINA_MORPHOGENESIS_IN_CAMERA_TYPE_EYE	37	-0.156772	-1.10868	0.325301	0.675261	1	7163	tags=68%, list=52%, signal=140%
GO_DEOXYRIBOSE_PHOSPHATE_CATABOLIC_PROCESS	20	-0.209945	-1.10865	0.288931	0.674439	1	6074	tags=65%, list=44%, signal=116%
GO_CELLULAR_RESPONSE_TO_PH	16	-0.229728	-1.10812	0.320564	0.674735	1	3732	tags=50%, list=27%, signal=68%
GO_NEGATIVE_REGULATION_OF_INTERLEUKIN_2_PRODUCTION	15	-0.23705	-1.10763	0.339587	0.674859	1	413	tags=27%, list=3%, signal=27%
GO_NEGATIVE_REGULATION_OF_ERK1_AND_ERK2_CASCADE	58	-0.125029	-1.10643	0.319277	0.676645	1	9935	tags=84%, list=72%, signal=301%
GO_PURINE_NUCLEOSIDE_BIOSYNTHETIC_PROCESS	19	-0.207312	-1.1061	0.322266	0.676452	1	5856	tags=63%, list=42%, signal=110%
GO_POSITIVE_REGULATION_OF_OXIDOREDUCTASE_ACTIVITY	41	-0.144321	-1.10511	0.314229	0.6778	1	5753	tags=56%, list=42%, signal=96%
GO_CELLULAR_RESPONSE_TO_REACTIVE_OXYGEN_SPECIES	138	-0.0814107	-1.10497	0.325349	0.677228	1	5785	tags=50%, list=42%, signal=85%
GO_RESPONSE_TO_MISFOLDED_PROTEIN	22	-0.201104	-1.10444	0.326531	0.677507	1	11023	tags=100%, list=80%, signal=497%
GO_POSITIVE_REGULATION_OF_LIPID_LOCALIZATION	58	-0.12352	-1.10327	0.308851	0.679097	1	3298	tags=36%, list=24%, signal=47%
GO_PLATELET_AGGREGATION	52	-0.130993	-1.10287	0.339357	0.679051	1	5362	tags=52%, list=39%, signal=85%
GO_POSITIVE_REGULATION_OF_ACTIVATED_T_CELL_PROLIFERATION	16	-0.230753	-1.10158	0.319767	0.680983	1	1994	tags=38%, list=14%, signal=44%
GO_REGULATION_OF_CELL_DIVISION	132	-0.0805046	-1.10041	0.318533	0.68259	1	2976	tags=30%, list=22%, signal=37%
GO_MEMBRANE_DOCKING	173	-0.0712794	-1.10036	0.308793	0.681876	1	11785	tags=92%, list=85%, signal=628%
GO_RESPONSE_TO_INTERLEUKIN_6	31	-0.162666	-1.09915	0.318436	0.683711	1	7105	tags=68%, list=52%, signal=139%
GO_MICROVILLUS_ORGANIZATION	21	-0.199502	-1.09904	0.312245	0.683112	1	8418	tags=81%, list=61%, signal=207%
GO_SECONDARY_METABOLIC_PROCESS	40	-0.144502	-1.0986	0.349112	0.683249	1	5599	tags=55%, list=41%, signal=92%
GO_CYTOCHROME_COMPLEX_ASSEMBLY	33	-0.152077	-1.0959	0.331337	0.68824	1	5849	tags=58%, list=42%, signal=100%
GO_RAC_PROTEIN_SIGNAL_TRANSDUCTION	33	-0.157977	-1.09525	0.318182	0.688814	1	9529	tags=85%, list=69%, signal=274%
GO_HISTONE_EXCHANGE	38	-0.148025	-1.09511	0.336032	0.688271	1	8127	tags=74%, list=59%, signal=179%
GO_NEGATIVE_REGULATION_OF_SUPRAMOLECULAR_FIBER_ORGANIZATION	114	-0.0869439	-1.09489	0.303279	0.687898	1	7401	tags=62%, list=54%, signal=133%
GO_ENDOCRINE_HORMONE_SECRETION	33	-0.158883	-1.09456	0.328571	0.687801	1	7427	tags=70%, list=54%, signal=151%
GO_RESPONSE_TO_INTERLEUKIN_1	150	-0.0759754	-1.09443	0.323353	0.687241	1	10641	tags=85%, list=77%, signal=367%
GO_ESTABLISHMENT_OF_ORGANELLE_LOCALIZATION	451	-0.0428697	-1.09387	0.32998	0.687605	1	7930	tags=62%, list=58%, signal=140%
GO_EXTRACELLULAR_VESICLE_BIOGENESIS	20	-0.201078	-1.09113	0.332669	0.692777	1	4817	tags=55%, list=35%, signal=84%
GO_SYNCYTIUM_FORMATION	36	-0.151297	-1.0898	0.332	0.694844	1	2900	tags=36%, list=21%, signal=46%
GO_RESPIRATORY_BURST	26	-0.178035	-1.08939	0.342105	0.69487	1	3385	tags=42%, list=25%, signal=56%
GO_NEGATIVE_REGULATION_OF_RESPONSE_TO_WOUNDING	65	-0.115554	-1.08932	0.304878	0.694172	1	6053	tags=55%, list=44%, signal=98%
GO_REGULATION_OF_MYELOID_LEUKOCYTE_MEDIATED_IMMUNITY	40	-0.144177	-1.08851	0.334653	0.695087	1	9396	tags=83%, list=68%, signal=258%
GO_NEGATIVE_REGULATION_OF_LIPID_BIOSYNTHETIC_PROCESS	37	-0.153249	-1.08786	0.34608	0.695642	1	6466	tags=62%, list=47%, signal=117%
GO_REGULATION_OF_FATTY_ACID_TRANSPORT	20	-0.206742	-1.08698	0.335283	0.696669	1	4739	tags=55%, list=34%, signal=84%
GO_ALPHA_AMINO_ACID_METABOLIC_PROCESS	133	-0.0826132	-1.08591	0.353877	0.698053	1	8516	tags=70%, list=62%, signal=181%
GO_NEGATIVE_REGULATION_OF_BLOOD_PRESSURE	35	-0.153352	-1.08566	0.345572	0.697721	1	4984	tags=51%, list=36%, signal=80%
GO_MALE_MEIOTIC_NUCLEAR_DIVISION	30	-0.170089	-1.08531	0.355212	0.697637	1	10532	tags=93%, list=76%, signal=394%
GO_RESPONSE_TO_OXYGEN_RADICAL	25	-0.180694	-1.08519	0.337232	0.697051	1	9098	tags=84%, list=66%, signal=246%
GO_POSITIVE_REGULATION_OF_PROTEIN_DEACETYLATION	19	-0.207465	-1.08502	0.335938	0.696549	1	773	tags=26%, list=6%, signal=28%
GO_RESPONSE_TO_AMINO_ACID_STARVATION	47	-0.134065	-1.08465	0.326531	0.696562	1	9602	tags=83%, list=70%, signal=272%
GO_MYELOID_LEUKOCYTE_DIFFERENTIATION	152	-0.076947	-1.08289	0.34238	0.699514	1	2490	tags=26%, list=18%, signal=31%
GO_PEROXISOME_ORGANIZATION	72	-0.10883	-1.08195	0.329218	0.70067	1	10192	tags=85%, list=74%, signal=323%
GO_RESPONSE_TO_MITOCHONDRIAL_DEPOLARISATION	19	-0.206647	-1.08153	0.367188	0.700747	1	6591	tags=68%, list=48%, signal=131%
GO_ZINC_ION_TRANSMEMBRANE_TRANSPORT	19	-0.204794	-1.08006	0.358674	0.7031	1	4439	tags=53%, list=32%, signal=78%
GO_POSITIVE_REGULATION_OF_TUMOR_NECROSIS_FACTOR_SUPERFAMILY_CYTOKINE_PRODUCTION	64	-0.115012	-1.07955	0.332689	0.703353	1	8550	tags=73%, list=62%, signal=192%
GO_CENTROSOME_DUPLICATION	62	-0.114508	-1.07941	0.3375	0.70281	1	10218	tags=85%, list=74%, signal=328%
GO_NUCLEOSIDE_TRIPHOSPHATE_METABOLIC_PROCESS	54	-0.128687	-1.07901	0.353535	0.702911	1	7938	tags=70%, list=58%, signal=165%
GO_VIRAL_BUDDING_VIA_HOST_ESCRT_COMPLEX	20	-0.197582	-1.07781	0.336016	0.70468	1	9692	tags=90%, list=70%, signal=302%
GO_POSITIVE_REGULATION_OF_CALCIUM_MEDIATED_SIGNALING	35	-0.156038	-1.07757	0.350877	0.704383	1	4159	tags=46%, list=30%, signal=65%
GO_PEPTIDYL_L_CYSTEINE_S_PALMITOYLATION	19	-0.203502	-1.07722	0.32438	0.704288	1	8086	tags=79%, list=59%, signal=191%
GO_REGULATION_OF_PROTEIN_SERINE_THREONINE_KINASE_ACTIVITY	434	-0.0446056	-1.077	0.362035	0.70391	1	9955	tags=76%, list=72%, signal=266%
GO_OOCYTE_DIFFERENTIATION	37	-0.147208	-1.077	0.357834	0.703066	1	8040	tags=73%, list=58%, signal=175%
GO_REGULATION_OF_CARDIAC_MUSCLE_CELL_MEMBRANE_REPOLARIZATION	20	-0.204706	-1.07635	0.352227	0.70361	1	10973	tags=100%, list=80%, signal=489%
GO_POSITIVE_REGULATION_OF_INTERLEUKIN_6_PRODUCTION	58	-0.120688	-1.07612	0.336016	0.70326	1	2148	tags=28%, list=16%, signal=33%
GO_AORTA_MORPHOGENESIS	27	-0.171228	-1.07559	0.348606	0.703566	1	2752	tags=37%, list=20%, signal=46%
GO_REGULATION_OF_VESICLE_FUSION	27	-0.172608	-1.07544	0.34902	0.703033	1	2733	tags=37%, list=20%, signal=46%
GO_PSEUDOURIDINE_SYNTHESIS	17	-0.216051	-1.07397	0.363273	0.705409	1	3515	tags=47%, list=25%, signal=63%
GO_NEGATIVE_REGULATION_OF_CELL_SUBSTRATE_ADHESION	52	-0.129946	-1.07375	0.386774	0.705072	1	1133	tags=21%, list=8%, signal=23%
GO_MULTIVESICULAR_BODY_ORGANIZATION	30	-0.164319	-1.07352	0.333969	0.704735	1	9692	tags=87%, list=70%, signal=291%
GO_CELL_JUNCTION_ORGANIZATION	261	-0.0572377	-1.07081	0.361616	0.709906	1	4669	tags=39%, list=34%, signal=59%
GO_ORGANELLE_TRANSPORT_ALONG_MICROTUBULE	73	-0.108773	-1.07072	0.348101	0.709249	1	9655	tags=81%, list=70%, signal=268%
GO_CARBOHYDRATE_TRANSPORT	105	-0.0890963	-1.06699	0.362319	0.716648	1	8501	tags=70%, list=62%, signal=182%
GO_CELLULAR_RESPONSE_TO_PEPTIDE	315	-0.0524134	-1.0658	0.34902	0.718447	1	2228	tags=21%, list=16%, signal=25%
GO_NEGATIVE_REGULATION_OF_B_CELL_ACTIVATION	27	-0.170945	-1.0657	0.369781	0.717814	1	9396	tags=85%, list=68%, signal=267%
GO_NEGATIVE_REGULATION_OF_LYMPHOCYTE_ACTIVATION	100	-0.0914659	-1.06549	0.350622	0.717427	1	10609	tags=86%, list=77%, signal=370%
GO_GLYCOLIPID_BIOSYNTHETIC_PROCESS	64	-0.114504	-1.06476	0.3625	0.718172	1	8126	tags=70%, list=59%, signal=170%
GO_NEGATIVE_REGULATION_OF_DEFENSE_RESPONSE	141	-0.0779176	-1.06392	0.340771	0.719204	1	7838	tags=65%, list=57%, signal=148%
GO_POSITIVE_REGULATION_OF_CALCIUM_ION_TRANSMEMBRANE_TRANSPORTER_ACTIVITY	31	-0.157464	-1.06058	0.369697	0.725892	1	2283	tags=32%, list=17%, signal=39%
GO_REGULATION_OF_CELL_FATE_COMMITMENT	16	-0.223498	-1.05933	0.380074	0.727833	1	1232	tags=31%, list=9%, signal=34%
GO_INOSITOL_PHOSPHATE_METABOLIC_PROCESS	43	-0.139647	-1.05868	0.376258	0.728337	1	5137	tags=51%, list=37%, signal=81%
GO_POSITIVE_REGULATION_OF_RESPONSE_TO_ENDOPLASMIC_RETICULUM_STRESS	35	-0.148847	-1.05848	0.376673	0.727883	1	5440	tags=54%, list=39%, signal=89%
GO_POSITIVE_REGULATION_OF_TRANSCRIPTION_OF_NOTCH_RECEPTOR_TARGET	18	-0.211222	-1.0575	0.374741	0.729177	1	2455	tags=39%, list=18%, signal=47%
GO_REGULATION_OF_RESPONSE_TO_FOOD	16	-0.220295	-1.0569	0.376953	0.729649	1	3000	tags=44%, list=22%, signal=56%
GO_REGULATION_OF_CYCLIN_DEPENDENT_PROTEIN_KINASE_ACTIVITY	92	-0.0931066	-1.05532	0.377083	0.732247	1	10268	tags=84%, list=74%, signal=325%
GO_REGULATION_OF_MITOCHONDRIAL_FISSION	21	-0.189366	-1.05344	0.353556	0.735523	1	5274	tags=57%, list=38%, signal=92%
GO_MODIFICATION_OF_SYNAPTIC_STRUCTURE	21	-0.189729	-1.05337	0.361472	0.734807	1	9866	tags=90%, list=72%, signal=317%
GO_REGULATION_OF_ENDOCRINE_PROCESS	30	-0.161885	-1.05319	0.350913	0.73432	1	7427	tags=70%, list=54%, signal=151%
GO_REGULATION_OF_AUTOPHAGOSOME_ASSEMBLY	32	-0.155003	-1.05306	0.383019	0.733763	1	2178	tags=31%, list=16%, signal=37%
GO_REGULATION_OF_PEPTIDE_HORMONE_SECRETION	160	-0.0722502	-1.0529	0.387226	0.733291	1	1171	tags=16%, list=8%, signal=17%
GO_CELLULAR_RESPONSE_TO_STARVATION	133	-0.0791263	-1.05177	0.393004	0.734889	1	10119	tags=81%, list=73%, signal=302%
GO_CRANIAL_NERVE_DEVELOPMENT	32	-0.156357	-1.05171	0.372881	0.73417	1	7331	tags=69%, list=53%, signal=146%
GO_RETROGRADE_AXONAL_TRANSPORT	15	-0.227047	-1.05169	0.385659	0.733348	1	7906	tags=80%, list=57%, signal=187%
GO_MICROTUBULE_ORGANIZING_CENTER_LOCALIZATION	26	-0.173984	-1.05035	0.381132	0.73548	1	8745	tags=81%, list=63%, signal=220%
GO_RESPONSE_TO_STARVATION	165	-0.071521	-1.05008	0.359438	0.735177	1	10310	tags=82%, list=75%, signal=320%
GO_CALCIUM_ION_REGULATED_EXOCYTOSIS	141	-0.0767205	-1.04932	0.389864	0.736067	1	3942	tags=36%, list=29%, signal=50%
GO_AMINO_SUGAR_METABOLIC_PROCESS	20	-0.193599	-1.04791	0.372745	0.738307	1	4920	tags=55%, list=36%, signal=85%
GO_POSITIVE_REGULATION_OF_EPIDERMAL_CELL_DIFFERENTIATION	17	-0.214227	-1.04744	0.391389	0.738453	1	10030	tags=94%, list=73%, signal=345%
GO_T_HELPER_17_TYPE_IMMUNE_RESPONSE	17	-0.215812	-1.04686	0.353053	0.738867	1	5952	tags=65%, list=43%, signal=114%
GO_REGULATION_OF_HUMORAL_IMMUNE_RESPONSE	33	-0.152592	-1.04649	0.388031	0.738814	1	5424	tags=55%, list=39%, signal=90%
GO_SECRETION_BY_TISSUE	24	-0.177136	-1.04551	0.37594	0.740121	1	7331	tags=71%, list=53%, signal=151%
GO_NEGATIVE_REGULATION_OF_RELEASE_OF_CYTOCHROME_C_FROM_MITOCHONDRIA	16	-0.213376	-1.04354	0.387674	0.743654	1	7405	tags=75%, list=54%, signal=162%
GO_RESPONSE_TO_HYDROGEN_PEROXIDE	120	-0.0816052	-1.04269	0.386774	0.744599	1	4057	tags=38%, list=29%, signal=53%
GO_NEGATIVE_REGULATION_OF_INTERLEUKIN_6_PRODUCTION	29	-0.162178	-1.04254	0.372233	0.744097	1	10609	tags=93%, list=77%, signal=403%
GO_INNER_EAR_AUDITORY_RECEPTOR_CELL_DIFFERENTIATION	24	-0.177381	-1.04173	0.395393	0.745034	1	11350	tags=100%, list=82%, signal=564%
GO_CELLULAR_RESPONSE_TO_VITAMIN	24	-0.179632	-1.04162	0.392562	0.744421	1	11319	tags=100%, list=82%, signal=557%
GO_GLOBAL_GENOME_NUCLEOTIDE_EXCISION_REPAIR	25	-0.174343	-1.04057	0.388	0.745973	1	11392	tags=100%, list=83%, signal=574%
GO_REGULATION_OF_VACUOLE_ORGANIZATION	38	-0.140767	-1.04006	0.386221	0.746307	1	2783	tags=34%, list=20%, signal=43%
GO_SYNAPSIS	28	-0.167133	-1.03987	0.39839	0.745883	1	8044	tags=75%, list=58%, signal=180%
GO_NEGATIVE_REGULATION_OF_ESTABLISHMENT_OF_PROTEIN_LOCALIZATION	135	-0.0780268	-1.0395	0.403162	0.745879	1	3226	tags=31%, list=23%, signal=40%
GO_MEIOTIC_CELL_CYCLE	176	-0.0675421	-1.0382	0.360465	0.747908	1	7309	tags=60%, list=53%, signal=125%
GO_REGULATION_OF_CELL_SIZE	162	-0.0685942	-1.03618	0.401163	0.75156	1	8175	tags=66%, list=59%, signal=160%
GO_PITUITARY_GLAND_DEVELOPMENT	28	-0.161847	-1.03584	0.386916	0.751459	1	4669	tags=50%, list=34%, signal=75%
GO_RESPONSE_TO_LEAD_ION	22	-0.186856	-1.03396	0.391566	0.7547	1	7458	tags=73%, list=54%, signal=158%
GO_REGULATION_OF_CELLULAR_RESPIRATION	27	-0.168766	-1.03365	0.402697	0.754512	1	9426	tags=85%, list=68%, signal=269%
GO_REGULATION_OF_ASTROCYTE_DIFFERENTIATION	28	-0.164849	-1.03333	0.402041	0.754386	1	2165	tags=32%, list=16%, signal=38%
GO_CARTILAGE_MORPHOGENESIS	22	-0.186552	-1.03262	0.413462	0.755136	1	3701	tags=45%, list=27%, signal=62%
GO_REGULATION_OF_NEURONAL_SYNAPTIC_PLASTICITY	50	-0.125698	-1.03213	0.377432	0.755342	1	4066	tags=42%, list=29%, signal=59%
GO_MUSCLE_CELL_CELLULAR_HOMEOSTASIS	18	-0.202752	-1.03205	0.402062	0.754633	1	4104	tags=50%, list=30%, signal=71%
GO_NEGATIVE_REGULATION_OF_RESPONSE_TO_CYTOKINE_STIMULUS	38	-0.140748	-1.03064	0.385057	0.756909	1	8590	tags=76%, list=62%, signal=202%
GO_NEGATIVE_REGULATION_OF_MICROTUBULE_POLYMERIZATION_OR_DEPOLYMERIZATION	33	-0.151931	-1.03029	0.399217	0.756821	1	5851	tags=58%, list=42%, signal=100%
GO_RESPONSE_TO_ARSENIC_CONTAINING_SUBSTANCE	29	-0.161672	-1.03008	0.407692	0.756403	1	6336	tags=62%, list=46%, signal=115%
GO_POSITIVE_REGULATION_OF_GLIOGENESIS	58	-0.112185	-1.02962	0.410204	0.756588	1	2027	tags=26%, list=15%, signal=30%
GO_MIDDLE_EAR_MORPHOGENESIS	15	-0.21777	-1.02941	0.389002	0.756192	1	6195	tags=67%, list=45%, signal=121%
GO_ADAPTATION_OF_SIGNALING_PATHWAY	16	-0.213376	-1.02936	0.414141	0.755441	1	7405	tags=75%, list=54%, signal=162%
GO_DEFENSE_RESPONSE_TO_BACTERIUM	90	-0.0921149	-1.0278	0.416136	0.758186	1	2723	tags=29%, list=20%, signal=36%
GO_REGULATION_OF_OXIDATIVE_STRESS_INDUCED_CELL_DEATH	54	-0.120668	-1.02733	0.383333	0.758385	1	7282	tags=65%, list=53%, signal=137%
GO_CELLULAR_RESPONSE_TO_OXIDATIVE_STRESS	255	-0.0561439	-1.02505	0.406439	0.762587	1	5785	tags=47%, list=42%, signal=80%
GO_POSITIVE_REGULATION_OF_BLOOD_CIRCULATION	51	-0.121684	-1.02453	0.389105	0.762884	1	6171	tags=57%, list=45%, signal=103%
GO_DEFENSE_RESPONSE_TO_GRAM_NEGATIVE_BACTERIUM	29	-0.161973	-1.02414	0.397566	0.762896	1	3003	tags=38%, list=22%, signal=48%
GO_NEUTRAL_LIPID_METABOLIC_PROCESS	81	-0.0977254	-1.01964	0.404472	0.772145	1	9047	tags=75%, list=66%, signal=218%
GO_L_AMINO_ACID_TRANSPORT	56	-0.115419	-1.01942	0.425403	0.771791	1	2356	tags=29%, list=17%, signal=34%
GO_REGULATION_OF_SYNAPTIC_VESICLE_TRANSPORT	81	-0.0981225	-1.01917	0.416162	0.771539	1	8020	tags=68%, list=58%, signal=161%
GO_REGULATION_OF_GLYCOPROTEIN_BIOSYNTHETIC_PROCESS	35	-0.143466	-1.01914	0.389691	0.770726	1	5120	tags=51%, list=37%, signal=82%
GO_HOMOTYPIC_CELL_CELL_ADHESION	67	-0.104312	-1.01776	0.401942	0.772967	1	5362	tags=49%, list=39%, signal=80%
GO_REGULATION_OF_TRANSCRIPTION_BY_RNA_POLYMERASE_III	22	-0.181333	-1.01706	0.417355	0.773686	1	3146	tags=41%, list=23%, signal=53%
GO_ORGAN_GROWTH	142	-0.0729063	-1.01668	0.417537	0.773688	1	6387	tags=54%, list=46%, signal=99%
GO_PHOSPHATIDYLINOSITOL_METABOLIC_PROCESS	86	-0.0915834	-1.01627	0.413442	0.773744	1	9490	tags=78%, list=69%, signal=248%
GO_REGULATION_OF_NEUTROPHIL_MIGRATION	25	-0.167476	-1.01537	0.408081	0.774974	1	1557	tags=28%, list=11%, signal=32%
GO_POSITIVE_REGULATION_OF_CELL_KILLING	32	-0.150933	-1.01512	0.410058	0.774725	1	2234	tags=31%, list=16%, signal=37%
GO_MEMBRANE_REPOLARIZATION	38	-0.13947	-1.01438	0.429961	0.775575	1	2075	tags=29%, list=15%, signal=34%
GO_RESPONSE_TO_SALT	15	-0.216391	-1.01289	0.414062	0.778136	1	6214	tags=67%, list=45%, signal=121%
GO_NEGATIVE_REGULATION_OF_IMMUNE_SYSTEM_PROCESS	318	-0.0492473	-1.01283	0.419913	0.77741	1	10006	tags=77%, list=73%, signal=275%
GO_MYOFIBRIL_ASSEMBLY	50	-0.118792	-1.01215	0.420319	0.778086	1	5540	tags=52%, list=40%, signal=87%
GO_ACTIN_NUCLEATION	44	-0.12998	-1.01179	0.418	0.778008	1	10438	tags=89%, list=76%, signal=363%
GO_NEGATIVE_REGULATION_OF_NOTCH_SIGNALING_PATHWAY	36	-0.142906	-1.01145	0.410506	0.777925	1	5697	tags=56%, list=41%, signal=94%
GO_B_CELL_DIFFERENTIATION	87	-0.0927139	-1.01144	0.402778	0.777097	1	3803	tags=37%, list=28%, signal=50%
GO_EXTRACELLULAR_STRUCTURE_ORGANIZATION	326	-0.0478963	-1.01142	0.420619	0.776283	1	4221	tags=35%, list=31%, signal=50%
GO_NATURAL_KILLER_CELL_MEDIATED_IMMUNITY	30	-0.15597	-1.01136	0.43513	0.775569	1	11186	tags=97%, list=81%, signal=511%
GO_PROTEIN_AUTOUBIQUITINATION	59	-0.110495	-1.01039	0.419223	0.776822	1	8301	tags=71%, list=60%, signal=178%
GO_REGULATION_OF_INCLUSION_BODY_ASSEMBLY	15	-0.21176	-1.00871	0.431907	0.779852	1	9036	tags=87%, list=66%, signal=251%
GO_REGULATION_OF_PROTEIN_OLIGOMERIZATION	34	-0.146804	-1.00802	0.440252	0.780562	1	6905	tags=65%, list=50%, signal=129%
GO_SMOOTH_MUSCLE_CELL_MIGRATION	61	-0.110031	-1.0078	0.441113	0.780236	1	3238	tags=34%, list=23%, signal=45%
GO_CHONDROCYTE_DEVELOPMENT	41	-0.136137	-1.00768	0.410569	0.779669	1	7211	tags=66%, list=52%, signal=138%
GO_NEGATIVE_REGULATION_OF_CELL_MORPHOGENESIS_INVOLVED_IN_DIFFERENTIATION	91	-0.091293	-1.0075	0.438976	0.779225	1	8601	tags=71%, list=62%, signal=189%
GO_DOPAMINE_METABOLIC_PROCESS	22	-0.180016	-1.00707	0.434263	0.779315	1	3791	tags=45%, list=27%, signal=63%
GO_MOTILE_CILIUM_ASSEMBLY	18	-0.199848	-1.00659	0.442688	0.77956	1	8741	tags=83%, list=63%, signal=227%
GO_NEGATIVE_REGULATION_OF_POTASSIUM_ION_TRANSMEMBRANE_TRANSPORT	17	-0.198255	-1.00547	0.437768	0.781142	1	10250	tags=94%, list=74%, signal=366%
GO_REGULATION_OF_EXIT_FROM_MITOSIS	15	-0.219135	-1.0053	0.429474	0.780647	1	3418	tags=47%, list=25%, signal=62%
GO_RELAXATION_OF_MUSCLE	26	-0.164333	-1.00462	0.42126	0.781313	1	7817	tags=73%, list=57%, signal=168%
GO_REGULATION_OF_EPITHELIAL_CELL_MIGRATION	192	-0.0622863	-1.00452	0.436538	0.780701	1	3320	tags=30%, list=24%, signal=39%
GO_CHONDROCYTE_DEVELOPMENT_INVOLVED_IN_ENDOCHONDRAL_BONE_MORPHOGENESIS	20	-0.191017	-1.00442	0.436647	0.780101	1	4266	tags=50%, list=31%, signal=72%
GO_NEGATIVE_REGULATION_OF_CYTOSKELETON_ORGANIZATION	122	-0.0783087	-1.00399	0.427368	0.7802	1	8313	tags=68%, list=60%, signal=170%
GO_CELLULAR_BIOGENIC_AMINE_METABOLIC_PROCESS	42	-0.12962	-1.00324	0.445808	0.781001	1	9383	tags=81%, list=68%, signal=252%
GO_PROTEIN_DEGLYCOSYLATION	27	-0.159966	-1.00319	0.449791	0.78026	1	2907	tags=37%, list=21%, signal=47%
GO_NUCLEOTIDE_BINDING_DOMAIN_LEUCINE_RICH_REPEAT_CONTAINING_RECEPTOR_SIGNALING_PATHWAY	35	-0.137746	-1.003	0.429616	0.779874	1	9533	tags=83%, list=69%, signal=268%
GO_ARP2_3_COMPLEX_MEDIATED_ACTIN_NUCLEATION	32	-0.1498	-1.00283	0.420202	0.779398	1	10438	tags=91%, list=76%, signal=372%
GO_POSITIVE_REGULATION_OF_MYELOID_LEUKOCYTE_MEDIATED_IMMUNITY	22	-0.177249	-1.00237	0.42998	0.779673	1	8844	tags=82%, list=64%, signal=228%
GO_CELL_CELL_JUNCTION_ASSEMBLY	108	-0.0820178	-1.00109	0.424431	0.781701	1	4625	tags=42%, list=34%, signal=62%
GO_RENAL_FILTRATION	16	-0.205476	-1.00103	0.430894	0.781022	1	4928	tags=56%, list=36%, signal=87%
GO_POSITIVE_REGULATION_OF_CELL_DIVISION	60	-0.112068	-1.00082	0.420319	0.780703	1	4898	tags=47%, list=36%, signal=72%
GO_CYTOKINE_METABOLIC_PROCESS	77	-0.0940029	-1.00031	0.448276	0.781077	1	5876	tags=52%, list=43%, signal=90%
GO_REGULATION_OF_T_CELL_CYTOKINE_PRODUCTION	17	-0.202013	-0.9992	0.427699	0.7827	1	9387	tags=88%, list=68%, signal=276%
GO_REGULATION_OF_ANATOMICAL_STRUCTURE_SIZE	427	-0.0424947	-0.998751	0.447154	0.782824	1	8218	tags=64%, list=60%, signal=153%
GO_ENDOPLASMIC_RETICULUM_TUBULAR_NETWORK_ORGANIZATION	16	-0.207863	-0.997941	0.445087	0.783784	1	6619	tags=69%, list=48%, signal=132%
GO_REGULATION_OF_TUBE_SIZE	106	-0.0813685	-0.997783	0.439076	0.783307	1	3311	tags=32%, list=24%, signal=42%
GO_NUCLEOTIDE_SUGAR_BIOSYNTHETIC_PROCESS	22	-0.175424	-0.997446	0.448065	0.783256	1	9496	tags=86%, list=69%, signal=277%
GO_KETONE_BIOSYNTHETIC_PROCESS	35	-0.141056	-0.996625	0.424431	0.784161	1	3183	tags=37%, list=23%, signal=48%
GO_REPRODUCTIVE_BEHAVIOR	27	-0.160491	-0.996246	0.454023	0.784196	1	2389	tags=33%, list=17%, signal=40%
GO_NEGATIVE_REGULATION_OF_MULTI_ORGANISM_PROCESS	104	-0.0856722	-0.996089	0.442424	0.783722	1	3337	tags=33%, list=24%, signal=43%
GO_TRANSCYTOSIS	15	-0.217538	-0.994622	0.445135	0.786111	1	8037	tags=80%, list=58%, signal=192%
GO_POSITIVE_REGULATION_OF_FAT_CELL_DIFFERENTIATION	56	-0.112008	-0.99457	0.463918	0.785404	1	4373	tags=43%, list=32%, signal=63%
GO_POSITIVE_REGULATION_OF_MAP_KINASE_ACTIVITY	225	-0.057595	-0.994262	0.424116	0.785259	1	9946	tags=78%, list=72%, signal=274%
GO_CELL_DIFFERENTIATION_IN_HINDBRAIN	16	-0.201915	-0.9939	0.454361	0.785288	1	5839	tags=63%, list=42%, signal=108%
GO_REGULATION_OF_RESPONSE_TO_EXTRACELLULAR_STIMULUS	22	-0.180072	-0.993223	0.444668	0.785956	1	9432	tags=86%, list=68%, signal=273%
GO_RECEPTOR_BIOSYNTHETIC_PROCESS	19	-0.191311	-0.993058	0.464427	0.785508	1	3173	tags=42%, list=23%, signal=55%
GO_REGULATION_OF_OSTEOCLAST_DIFFERENTIATION	43	-0.128702	-0.993035	0.4375	0.784731	1	10419	tags=88%, list=76%, signal=360%
GO_REGULATION_OF_REGULATED_SECRETORY_PATHWAY	142	-0.071602	-0.992868	0.445972	0.784303	1	7376	tags=61%, list=53%, signal=129%
GO_NUCLEOSIDE_PHOSPHATE_METABOLIC_PROCESS	180	-0.0630458	-0.992596	0.422481	0.784088	1	6115	tags=51%, list=44%, signal=90%
GO_REGULATION_OF_HORMONE_SECRETION	200	-0.0610474	-0.992242	0.442589	0.784085	1	1171	tags=15%, list=8%, signal=16%
GO_CELL_ADHESION_MEDIATED_BY_INTEGRIN	58	-0.110618	-0.992069	0.434959	0.783643	1	11084	tags=91%, list=80%, signal=464%
GO_REGULATION_OF_COLLATERAL_SPROUTING	19	-0.185663	-0.991406	0.453252	0.784301	1	6880	tags=68%, list=50%, signal=136%
GO_T_HELPER_1_TYPE_IMMUNE_RESPONSE	29	-0.155433	-0.990563	0.431102	0.785381	1	3093	tags=38%, list=22%, signal=49%
GO_NEGATIVE_REGULATION_OF_CELL_PROJECTION_ORGANIZATION	166	-0.0646999	-0.989823	0.46	0.786193	1	8175	tags=66%, list=59%, signal=159%
GO_RESPONSE_TO_MECHANICAL_STIMULUS	167	-0.0652591	-0.989552	0.456349	0.785986	1	9930	tags=78%, list=72%, signal=277%
GO_B_CELL_HOMEOSTASIS	25	-0.166794	-0.989438	0.445564	0.785426	1	9841	tags=88%, list=71%, signal=307%
GO_BARBED_END_ACTIN_FILAMENT_CAPPING	18	-0.194329	-0.988384	0.417495	0.786903	1	4220	tags=50%, list=31%, signal=72%
GO_REGULATION_OF_POLYSACCHARIDE_METABOLIC_PROCESS	38	-0.137271	-0.988338	0.435203	0.786199	1	3194	tags=37%, list=23%, signal=48%
GO_POSITIVE_REGULATION_OF_GLYCOLYTIC_PROCESS	17	-0.200262	-0.987848	0.449704	0.786474	1	2110	tags=35%, list=15%, signal=42%
GO_CELLULAR_RESPONSE_TO_EXTRACELLULAR_STIMULUS	224	-0.0574447	-0.986691	0.442718	0.788203	1	10119	tags=79%, list=73%, signal=292%
GO_REGULATION_OF_OXIDATIVE_STRESS_INDUCED_INTRINSIC_APOPTOTIC_SIGNALING_PATHWAY	23	-0.170171	-0.986452	0.445564	0.787895	1	5453	tags=57%, list=40%, signal=93%
[truncated: 706 more rows]

## Sheet: MF_Up
Supplementary Table 5. GSEA results (C5-CC, C5-BP, and C5-MF domains) for W3-HM Shank2-mutant transcripts.
[truncated: 327 more rows]

[truncated: 1 more sheets: MF_Down]
